# Supplementary material for: Clade II Candida auris possess genomic structural variations related to an ancestral strain
Source: PubMed Central journal article supplement (PMC6785063; doi:10.1371/journal.pone.0223433), 2019-10-09
Supplement: pone.0223433.s014.pdf [file pone.0223433.s014.pdf]

**S1 Table. Summary of genome assembly statistics of *C. auris* strains.**

| Strain    | Accession number       | Clade | Country      | Total size (bp) | Scaffolds        | Contigs | Scaffold N50 (bp) | GC content (%) | Protein coding genes |
|-----------|------------------------|-------|--------------|-----------------|------------------|---------|-------------------|----------------|----------------------|
| JCM 15448 | BGOX01000000, AP018713 | II    | Japan        | 12,125,386      | N/A <sup>a</sup> | 12      | 3,155,023         | 45.2           | 5,238                |
| B8441     | PEKT00000000           | I     | Pakistan     | 12,365,959      | 15               | 18      | 1,083,522         | 45.2           | 5,421                |
| B11220    | PYFR00000000           | II    | Japan        | 12,111,869      | 320              | 327     | 60,224            | 45             | 5,546                |
| B11221    | PGLS00000000           | III   | South Africa | 12,741,178      | 20               | 23      | 2,363,944         | 45.3           | 5,527                |
| B11243    | PYGM00000000           | IV    | Venezuela    | 12,354,602      | 238              | 282     | 86,716            | 45             | 5,601                |

N/A, not available; <sup>a</sup>There is no gap region with "N" letters.
