# Supplementary material for: Clade II Candida auris possess genomic structural variations related to an ancestral strain
Source: PubMed Central journal article supplement (PMC6785063; doi:10.1371/journal.pone.0223433), 2019-10-09
Supplement: pone.0223433.s015.pdf [file pone.0223433.s015.pdf]

**S2 Table. Summary of antifungal drug resistance related gene of *C. albicans* and protein homology search with *C. auris* JCM 15448.**

| Function                        | Gene name          | Inhibitor   | <i>C. albicans</i>         |                  | <i>C. auris</i> JCM 15448  |        |                                           |                                                                |
|---------------------------------|--------------------|-------------|----------------------------|------------------|----------------------------|--------|-------------------------------------------|----------------------------------------------------------------|
|                                 |                    |             | Accession number (protein) | Length           | Gene number (Locus tag ID) | Length | Identity (reference: <i>C. albicans</i> ) | Gene position                                                  |
| Ergosterol biosynthesis pathway | <i>ERG10</i>       |             | AOW27457                   | 402              | CAJCM15448_03520           | 400    | 77.39%                                    | contig_01: 813530..814732                                      |
|                                 | <i>ERG13</i>       |             | AOW31581                   | 451              | CAJCM15448_44470           | 446    | 71.69%                                    | contig_04: 874815..876155                                      |
|                                 | <i>HMG1</i>        |             | AOW26055                   | 1,073            | CAJCM15448_08270           | 1,019  | 62.29%                                    | contig_01: complement(1895163..1898222)                        |
|                                 | <i>ERG12</i>       |             | AOW26579                   | 431              | CAJCM15448_51900           | 425    | 55.50%                                    | contig_06: 815147..816424                                      |
|                                 | <i>ERG8</i>        |             | AOW28958                   | 432              | CAJCM15448_18590           | 432    | 55.76%                                    | contig_02: 447424..448722                                      |
|                                 | <i>ERG19 (MVD)</i> |             | AOW25709                   | 362              | CAJCM15448_36150           | 385    | 71.47%                                    | contig_03: complement(join(1295111..1296223,1296270..1296314)) |
|                                 | <i>IDI1</i>        |             | AOW28999                   | 284              | CAJCM15448_18870           | 281    | 67.62%                                    | contig_02: 511518..512363                                      |
|                                 | <i>ERG20</i>       |             | AOW27484                   | 351              | CAJCM15448_09210           | 350    | 78.51%                                    | contig_01: complement(2101134..2102186)                        |
|                                 | <i>ERG9</i>        |             | BAA13995                   | 448              | CAJCM15448_43670           | 445    | 63.45%                                    | contig_04: 660713..662050                                      |
|                                 | <i>ERG1</i>        | allylamines | AAC49715                   | 496              | CAJCM15448_21120           | 494    | 66.19%                                    | contig_02: complement(1051410..1052894)                        |
|                                 | <i>ERG7</i>        |             | AAA34342                   | 728              | CAJCM15448_12350           | 737    | 67.67%                                    | contig_01: complement(2811257..2813470)                        |
|                                 | <i>ERG11</i>       | azoles      | CAA31658                   | 528              | CAJCM15448_19130           | 524    | 70.57%                                    | contig_02: complement(566242..567816)                          |
|                                 | <i>ERG24</i>       | morpholines | AOW27923                   | 448              | CAJCM15448_22310           | 441    | 66.74%                                    | contig_02: complement(1309895..1311220)                        |
|                                 | <i>ERG25</i>       |             | AAC06014                   | 308              | CAJCM15448_20140           | 303    | 76.59%                                    | contig_02: join(853136..853143,853206..854109)                 |
|                                 | <i>ERG26</i>       |             | AOW29353                   | 350              | CAJCM15448_35460           | 351    | 72.67%                                    | contig_03: complement(1125892..1126947)                        |
|                                 | <i>ERG27</i>       |             | AOW30876                   | 346              | CAJCM15448_46890           | 343    | 61.40%                                    | contig_05: complement(522931..523962)                          |
|                                 | <i>ERG6</i>        |             | AOW28252                   | 376              | CAJCM15448_15510           | 375    | 86.76%                                    | contig_01: complement(3529375..3530502)                        |
|                                 | <i>ERG2</i>        | morpholines | AOW25777                   | 217              | CAJCM15448_11770           | 218    | 66.99%                                    | contig_01: 2679855..2680511                                    |
|                                 | <i>ERG3</i>        | azoles      | AAC99343                   | 386              | CAJCM15448_03450           | 363    | 67.10%                                    | contig_01: 798476..799567                                      |
|                                 | <i>ERG5</i>        |             | AOW30631                   | 517              | CAJCM15448_50480           | 522    | 77.41%                                    | contig_06: complement(502071..503639)                          |
| <i>ERG4</i>                     |                    | AOW28125    | 469                        | CAJCM15448_23860 | 462                        | 69.03% | contig_02: 1654178..1655566               |                                                                |
