# Supplementary material for: Clade II Candida auris possess genomic structural variations related to an ancestral strain
Source: PLoS One. 2019 Oct 9;14(10):e0223433. doi: 10.1371/journal.pone.0223433 (PMC6785063; doi:10.1371/journal.pone.0223433)
Supplement: S3 Dataset — (XLSX) [file pone.0223433.s003.xlsx]

## Sheet: S3 Dataset
S3 Dataset. List of detected copy number variation reagions among 111 C. auris strains.
sort	Description	contig	region	SAMN05379619	SAMN05379622	SAMN05379621	SAMN05379620	SAMN05379623	TWCC 50952	TWCC 58191	JCM1 5448	SAMN05379608	TWCC 58362	SAMEA44340418	TWCC 13878	TWCC 13846	TWCC 13847	SAMN05379618	SAMN05379609	SAMN05379610	SAMN05379611	SAMEA44337418	SAMN05379612	SAMN05379614	SAMN05379616	SAMN05379613	SAMN05379615	SAMN05379617	SAMEA44357668	SAMEA44358418	SAMEA44338918	SAMEA44351668	SAMEA44356918	SAMEA44336668	SAMEA44338168	SAMEA44366668	SAMEA44367418	SAMEA44347168	SAMEA44362918	SAMEA44342668	SAMEA44343418	SAMEA44348668	SAMEA44341918	SAMEA44350168	SAMEA44349418	SAMEA44344168	SAMEA44346418	SAMEA104588946	SAMEA44345668
1		1	2001..3000	0.947419	0.998927	0.900344	1.06151	1.0342	0.967456	1.09452	1.12995	0.989458	1.08963	1.07896	1.10769	1.16596	0.983155	1.04211	0.995572	1.05457	0.939699	1.04996	1.06388	0.927435	0.989065	0.97253	0.988109	0.979401	0.982136	1.08102	1.05987	1.09309	1.09622	1.00386	1.06447	1.10017	1.08791	1.13556	1.05558	1.11262	1.14894	1.08841	1.14352	1.05342	1.0667	1.05928	1.18692	1.8215	1.13985
2		1	3001..4000	0.923678	0.816343	0.953655	0.849994	0.978928	0.963966	0.916809	1.18601	0.875041	1.1049	0.941592	0.891255	1.02419	1.00536	0.866594	0.778275	0.808057	0.848639	1.03713	0.921676	0.783609	0.871866	1.02033	0.808416	0.813119	0.969439	0.922125	1.02424	0.944345	0.938784	0.922265	0.880169	0.987929	0.909654	0.963176	0.9208	0.951245	0.985953	0.976847	0.941665	0.977024	1.0005	0.903724	1.06999	1.80588	0.990932
3		1	4001..5000	1.0201	0.831284	0.906425	0.755196	0.94174	0.974428	1.00833	1.48255	0.92666	1.0162	1.02219	0.933645	0.991893	0.857145	0.836382	0.922563	0.958714	0.999664	1.07868	0.758198	0.949633	0.832281	0.899922	0.779169	0.802591	0.979824	0.986614	0.968427	1.0574	0.891485	0.915965	0.933652	0.960313	0.978954	0.951632	0.826897	0.920606	0.92536	1.04149	1.02979	0.981432	0.953427	0.967102	1.13403	2.30064	1.0054
4		1	5001..6000	1.10114	1.05045	1.04137	0.968358	1.02621	0.864622	1.11794	1.42912	0.926894	1.07981	1.11999	1.11988	1.07868	0.993368	0.933012	1.10958	1.0428	1.08079	1.09814	0.930757	1.12599	1.009	1.0892	0.980097	0.969093	1.03903	1.00717	0.963192	1.05257	0.949956	0.978845	1.02486	0.984921	1.12643	0.900883	0.98138	0.963073	1.0436	0.996582	1.04429	0.995321	1.08763	1.05693	1.10003	2.09041	0.990172
5		1	6001..7000	1.13733	1.00593	1.0603	1.00339	1.01113	1.06734	1.0526	1.37272	1.03346	1.08634	1.16476	0.961648	1.06517	0.919825	1.04008	1.05029	1.06513	1.06872	1.16266	0.94521	0.956782	1.00265	0.945456	1.00976	1.0038	1.03337	1.00169	1.02624	1.09093	1.08927	1.01248	1.13909	1.00608	0.994043	1.0734	0.975175	0.966633	0.985663	1.0141	1.07228	1.01268	1.05541	1.01139	1.07321	1.76667	1.0376
6		1	7001..8000	1.16395	1.00103	1.07899	1.00696	0.954864	0.98656	1.11352	1.25779	1.1248	0.978711	1.22156	1.19626	1.04547	0.862701	0.967761	1.07606	1.00321	1.10598	1.09748	0.929738	1.11946	0.934481	1.06312	1.00939	1.04256	1.01937	1.1134	1.08399	1.0388	1.10512	1.00718	1.08687	1.0596	1.08085	1.20349	1.14513	1.04047	1.01406	1.08738	1.12861	1.05976	1.22648	1.08868	1.19387	1.67835	1.10931
7		1	8001..9000	1.02523	1.01118	1.14889	1.06061	0.978842	1.07279	1.0326	1.34345	1.11623	1.12147	1.04752	1.19639	1.02024	0.971383	1.09105	1.06303	1.03325	0.97727	1.10536	1.02734	1.10577	1.14182	0.997673	1.00099	1.08277	0.962381	0.990282	1.09321	0.966027	1.05076	0.97566	1.09107	1.0469	1.1486	1.12107	1.02972	1.04653	0.969525	1.05268	1.02575	1.03181	1.08915	1.02114	0.985517	1.46912	0.987061
8		1	12001..13000	1.03774	0.978975	1.16546	1.03203	1.10193	0.962916	1.11802	1.36904	0.946945	1.12038	1.06111	1.03268	0.943739	0.978043	0.977946	1.02382	1.04507	1.00946	1.10351	1.07962	1.05865	0.982481	1.13394	1.10755	1.02095	0.999082	1.07856	0.970113	1.1427	1.0104	0.908892	1.04946	1.08126	1.04119	1.06742	0.982807	1.0449	0.958376	1.04588	1.01989	1.09393	1.13561	1.14985	0.986411	1.6121	1.04103
9		1	13001..14000	0.925114	1.19007	0.989548	1.05371	0.92956	1.17164	1.01184	1.17091	0.938854	0.94321	1.09157	1.11547	0.808743	1.06423	1.012	0.969204	1.08366	0.967292	0.961951	1.04989	1.05192	0.932811	0.940753	1.05574	0.916004	0.979053	1.01711	0.969119	1.07014	1.04159	0.923978	0.973867	0.998878	0.991784	0.996313	1.08487	0.996598	1.04016	1.06149	1.07886	1.11132	1.07156	1.0903	1.0435	1.14302	1.02595
10		1	35001..36000	1.01436	1.02827	1.07537	1.05791	1.00735	0.862724	0.969391	1.22894	1.09735	1.03914	1.07737	0.955058	1.03075	0.990112	1.10995	0.934881	1.0552	0.901566	0.971953	0.834971	1.1247	0.990751	1.03176	0.987883	1.00581	1.14372	1.19325	0.987888	1.04366	1.13885	0.963742	1.08628	1.10476	1.03544	1.11307	1.27862	1.16552	0.987776	1.08029	1.08308	1.10516	1.0995	1.24596	1.00899	1.39862	1.03878
11		1	43001..44000	0.753952	0.849572	0.695242	0.83949	0.790317	0.785537	0.935018	0.839201	0.99294	0.805853	1.15275	0.838743	0.81605	0.738899	1.14584	1.06875	1.20455	0.998828	1.01328	1.07148	1.2519	1.07195	1.08499	1.17913	1.18799	1.09847	1.06353	1.03583	1.01195	1.1123	0.916515	1.02199	1.0259	1.12587	1.00146	1.06754	1.19191	1.03098	1.12759	1.11727	1.06416	1.09778	1.24237	1.09055	1.63607	1.09232
12		1	51001..52000	0.9113	0.916976	0.82641	0.917669	0.872384	0.976833	0.928759	1.33442	0.815596	1.07102	0.909984	1.19057	0.907172	1.01174	0.940308	0.886406	0.861996	0.908987	0.918098	0.979139	0.839907	0.817131	0.857597	0.926154	0.872688	0.87534	0.920737	0.872181	1.03236	0.978063	0.889973	0.945837	0.921923	0.915528	0.82885	0.826322	0.904807	0.945414	0.954915	1.01448	0.925988	0.851211	0.972494	0.900323	1.83425	0.964973
13		1	55001..56000	1.18302	1.1097	1.08818	1.25424	1.10302	1.03776	1.00854	1.12292	1.13988	0.947398	1.15458	0.97035	0.940317	0.918035	1.11021	1.03077	1.06469	0.949235	1.12375	1.12845	1.07485	1.12701	1.08768	1.16452	1.12325	1.10068	1.16037	1.14072	1.14921	1.1843	1.05553	1.13883	1.09628	1.13504	1.23011	1.32555	1.13265	1.17629	1.09524	1.09559	1.11077	1.13077	1.21994	1.09953	1.69919	1.18366
14		1	56001..57000	1.11076	1.02196	0.964913	1.06778	1.06029	1.02531	1.1408	1.26897	1.04767	1.07183	1.08496	1.04666	0.957634	0.996216	1.03569	0.91126	1.01769	1.11553	1.11413	1.14142	0.952539	0.996688	1.06962	1.03323	1.04246	1.09544	1.01502	1.09106	1.0695	1.06925	0.978242	1.09892	1.09203	1.08605	1.00273	1.10551	1.0224	1.0783	1.02168	0.968594	1.03045	1.02546	1.01242	1.0644	1.62516	1.12359
15		1	57001..58000	1.10313	1.04977	1.10597	1.20635	1.0833	0.99529	1.03337	1.20634	0.958583	1.06291	1.2062	0.907802	1.12241	0.954519	1.08281	0.945723	0.987405	0.861772	1.182	1.18568	0.923472	1.0044	1.04551	1.02148	0.978418	1.10514	1.04104	1.04881	1.13833	1.15027	1.08259	1.072	1.04371	1.02701	1.00909	1.18088	1.05678	1.16463	1.08179	1.13814	1.10625	1.07526	1.15906	1.14003	1.69832	1.07706
16		1	68001..69000	1.07142	0.925468	0.95642	0.973323	0.943083	0.959951	0.952643	1.16898	0.961984	0.982205	0.946044	0.98785	0.953601	0.935205	0.963675	0.925948	1.01879	0.860911	0.983951	0.878213	0.898612	0.85865	1.05018	0.899835	0.970489	1.00538	1.02914	0.97195	1.079	1.06187	0.951336	0.968294	0.946183	1.0966	0.975666	1.00409	1.06173	0.979622	1.00307	1.05909	0.975223	0.944772	0.94782	0.991375	1.52281	1.02526
17		1	75001..76000	1.27996	1.09609	1.21872	1.18235	1.10093	1.04101	1.12423	1.2099	1.16164	0.995024	1.07594	1.01449	1.11433	1.01186	1.13878	1.09247	1.09022	1.0293	1.09947	1.12489	1.01921	1.06264	0.982433	1.03606	1.03854	1.11111	1.03123	1.01264	1.08427	1.03613	1.05046	1.02424	1.03389	1.04293	1.20751	1.09462	1.05482	1.0135	1.10054	1.11928	1.06696	1.11789	0.990318	1.09884	1.62261	1.0976
18		1	81001..82000	0.895469	0.975369	0.930402	1.03268	0.982808	1.14747	1.01596	0.945273	1.1616	0.977371	1.20108	0.928564	1.03119	1.03208	1.03118	1.07751	1.1546	1.07474	1.13356	1.12191	1.32805	1.22036	1.13631	1.15553	1.19397	1.21542	1.13948	1.18975	1.09145	1.12486	1.20796	1.04014	1.10525	1.13886	1.15566	1.17288	1.1736	1.13572	1.24441	1.02506	1.20863	1.18485	1.12543	1.15562	1.13084	1.178
19		1	82001..83000	0.976705	1.01459	1.18732	1.14549	1.3395	1.0299	1.026	0.935243	1.16938	0.924305	1.17484	0.815188	0.865763	0.929315	1.2133	1.23442	1.12285	1.23604	1.19492	1.23682	1.36222	1.33663	1.28103	1.18679	1.25936	1.13701	1.22019	1.14862	1.12769	1.11642	1.25737	1.22757	1.1792	1.25748	1.2634	1.33124	1.16018	1.17145	1.16247	1.04409	1.12906	1.13319	1.14807	1.1053	0.788917	1.20682
20		1	102001..103000	0.96455	1.04777	1.01919	1.0483	1.00711	1.08199	1.21952	1.0111	1.01152	1.07573	1.14888	1.17188	0.989477	1.03504	1.0432	0.996973	1.13465	1.11333	1.04661	0.963804	1.09686	1.09251	1.08401	1.08207	0.975731	1.10533	1.0208	0.94595	1.01096	1.08326	1.08703	1.02502	1.09754	1.15956	1.06014	1.02988	1.05225	1.03634	0.992421	0.964007	1.0699	1.02194	1.07038	1.09218	1.61361	1.04189
21		1	126001..127000	0.999183	1.02908	0.939709	0.94171	1.0667	1.02425	1.0521	1.03009	0.938056	0.930863	1.09955	0.989963	1.03634	1.02603	1.18307	1.0583	1.13523	0.975214	1.1356	1.02243	1.07541	0.998294	1.16045	1.03894	0.991826	1.19731	1.03229	1.09913	1.07696	1.08979	1.01999	1.08193	1.07994	1.04482	1.03528	1.00744	1.07055	1.17484	1.1572	1.06091	1.03226	1.06911	1.10446	1.05652	1.63415	1.07228
22		1	169001..170000	0.891359	0.906135	0.863098	0.887354	0.829411	1.00831	0.997589	1.18578	0.771568	1.17991	0.931854	1.06288	1.08464	0.988303	0.927884	0.791637	0.851575	0.887393	0.915917	0.926511	0.800385	0.767724	0.843216	0.847287	0.80404	0.923003	0.93111	0.83925	0.989242	0.859203	1.08639	0.950199	0.930095	0.863295	0.971202	0.840208	0.959756	0.888147	0.823288	0.868987	0.850064	0.905793	0.891119	0.920215	1.62976	0.865984
23		1	175001..176000	0.93894	0.773047	0.801108	0.79209	0.841879	1.08741	0.981809	0.956887	0.833802	0.982831	0.842359	0.881765	0.884776	0.900901	0.827475	0.738676	0.784682	0.816134	0.833862	0.892455	0.86608	0.820375	0.87956	0.863166	0.81103	0.816582	0.784044	0.862899	0.918733	0.861987	0.885731	0.846338	0.869228	0.781787	0.827552	0.847553	0.767204	0.863966	0.875724	0.864439	0.885108	0.80504	0.910305	0.925235	1.16973	0.907442
24		1	178001..179000	0.954338	0.901349	1.0017	0.996106	0.896533	1.01959	1.06941	1.10193	0.94369	1.13197	1.0175	0.956859	0.939587	0.944945	1.06466	0.887412	0.80276	0.915332	0.936342	0.961712	0.873204	0.830451	1.04057	0.806667	0.998517	0.909211	0.983247	0.960263	0.923655	0.984202	1.07136	0.97618	0.951835	0.988639	0.959328	0.91403	0.889615	1.01296	0.88903	1.04402	0.916246	0.985644	0.965752	0.996525	1.20874	0.949929
25		1	206001..207000	0.888574	0.699398	0.787516	0.729331	0.691675	0.908018	0.859287	0.852613	0.583175	1.0748	0.794259	0.826654	0.974823	0.867553	0.790098	0.721402	0.803449	0.817258	0.884184	0.69961	0.673421	0.821845	0.832015	0.67798	0.747562	0.804099	0.872744	0.804846	0.891991	0.81254	0.855977	0.837469	0.822574	0.653835	0.71605	0.74579	0.779951	0.812699	0.818974	0.878312	0.760915	0.788087	0.800902	0.759196	1.11943	0.827841
26		1	240001..241000	0.877323	0.874028	0.909651	0.920384	0.93864	1.06336	1.02886	1.01995	0.802089	1.02142	0.946197	1.01527	0.90733	0.880827	0.745081	0.942733	0.807793	0.891241	0.849104	0.952967	0.956016	0.935568	0.850163	0.859087	0.946974	1.07691	0.985071	0.955622	0.920217	0.960917	0.899229	0.950144	0.961181	0.96037	0.986792	0.916558	0.992499	0.982818	1.02427	0.959478	0.914093	1.03075	0.929588	0.903257	1.10819	0.926947
27	TWCC13846 and TWCC13847 unique CNV	1	478001..479000	0.947852	0.881634	0.928578	0.933584	0.986298	1.02155	1.10138	1.10667	1.01025	1.02207	1.06942	1.04417	2.15501	1.87105	0.914051	0.917456	0.921566	1.06905	1.03609	1.0316	1.03444	1.03209	1.01974	0.886621	0.794214	1.08817	1.05217	1.01908	1.03719	1.06108	0.8729	1.0929	1.13437	1.09686	0.973467	1.06825	1.05449	1.03806	0.997573	1.07441	1.09938	1.01857	1.14353	1.07321	0.897649	1.00683
28	TWCC13846 and TWCC13847 unique CNV	1	479001..480000	0.74702	0.74749	0.691427	0.63588	0.742613	0.873859	0.949371	1.01136	0.98106	1.00847	0.950292	0.991345	2.06469	1.79136	0.809319	0.784725	0.803985	0.86513	0.853131	0.878255	0.895706	0.78321	0.818132	0.813745	0.758327	1.08652	1.0308	0.992795	0.881361	0.891246	0.738425	0.818081	1.08257	1.00112	0.844637	0.84789	0.885252	0.843932	0.842469	0.99331	0.996851	0.944976	0.915332	0.891019	1.14443	0.9105
29	TWCC13846 and TWCC13847 unique CNV	1	480001..481000	0.893686	0.822723	0.834903	0.9176	0.90495	0.979221	0.912495	0.743344	1.23514	0.605519	0.86185	0.833098	1.77263	1.5478	1.04441	0.943053	1.037	0.989949	0.869175	1.04179	1.03568	0.946898	1.01248	1.07993	0.990931	1.05451	0.940474	0.920357	0.921307	0.958594	0.843474	0.96793	0.916444	1.00143	0.974632	1.04728	1.02795	0.906669	0.824886	0.928011	0.950324	0.974666	0.914335	0.904272	0.80466	0.858055
30		1	535001..536000	1.1022	1.13387	0.921527	1.02625	1.08636	1.00935	0.973438	1.09478	1.00267	1.03003	0.996964	0.93235	1.07928	1.02079	1.10365	0.967474	1.07633	0.985049	1.07767	1.02896	0.962836	1.0575	1.11334	1.09039	1.09592	1.05631	0.949324	1.03874	1.00363	1.04631	1.04741	0.980342	0.983946	1.04047	0.97074	1.04986	0.999826	1.02846	1.03479	1.03026	1.01381	0.90791	1.00443	1.02636	1.22582	1.04674
31		1	538001..539000	0.960106	0.875062	0.78935	0.887612	0.787757	1.00476	1.00179	1.28939	0.952547	1.04938	1.03055	0.984784	0.901452	0.937088	1.09129	0.935126	1.02526	0.975645	1.02704	0.964886	1.02262	0.989688	0.901366	0.9437	0.873022	1.12467	0.932022	0.964505	1.07902	1.06145	1.10162	1.02343	1.04593	0.943857	0.864911	0.988387	1.04576	0.940786	1.05404	0.958443	1.05887	1.07501	1.00666	1.04774	1.1242	0.96256
32		1	594001..595000	0.958609	0.88952	0.931403	0.995977	0.899406	0.977717	1.18782	1.05964	0.931963	1.12201	0.973318	0.971595	1.03952	0.96898	0.952921	0.884488	0.909646	1.06875	1.06606	0.951916	0.916008	0.845202	0.960764	0.923444	0.999246	0.943113	0.998045	1.1009	1.03356	1.03016	1.03854	1.05987	1.04555	0.949031	1.15111	0.899084	1.01212	1.02152	1.09985	1.01654	0.989121	1.06582	1.02052	1.08828	1.67927	1.04741
33		1	606001..607000	1.03715	0.979076	0.943769	0.901744	0.90634	1.00574	1.0795	1.0638	0.958881	1.00324	1.06796	1.12366	1.03408	0.929871	0.859832	0.894747	1.06292	1.00793	1.04121	1.00884	0.944637	0.971653	0.897229	0.965723	0.948923	0.952128	0.951342	1.00352	0.986226	1.02712	0.97361	0.968421	0.98155	0.942834	0.917133	0.830346	1.00444	0.94853	0.954844	0.91898	0.961113	1.00911	0.958142	0.898051	1.36236	0.975557
34		1	794001..795000	1.05181	0.955642	0.970856	0.982658	0.99826	0.902516	0.867323	0.848138	0.929755	0.816254	0.899227	0.94989	0.737197	0.756886	0.988143	1.01174	0.942551	0.982277	1.00861	0.983375	1.04219	0.980763	1.03597	1.04701	1.03701	0.967411	0.897148	0.87676	0.985205	0.978856	1.02543	0.907671	0.947844	1.04864	0.913373	0.92302	1.03586	0.927724	1.01432	0.977605	0.995633	0.997184	1.13027	1.05208	1.37344	0.946863
35		1	799001..800000	0.897412	0.915246	0.918222	0.819144	0.853427	0.856452	0.965744	1.08837	0.850146	0.97348	1.03166	1.04175	1.0454	0.835855	1.03823	0.871802	0.882342	0.91409	0.979999	0.886947	0.931143	0.903693	0.906585	0.863374	0.871652	1.05461	1.02926	1.02304	0.903329	0.945605	0.959358	0.949434	0.958454	1.009	0.937758	0.993472	0.940083	0.910325	0.970275	1.0063	0.97955	0.932352	0.948559	1.02577	1.37153	0.937808
36		1	873001..874000	1.04783	0.975133	1.06901	1.04041	1.02256	0.986551	1.07946	1.12692	1.0752	1.03618	1.03087	0.973912	1.03295	1.03025	1.03102	1.11376	1.02774	1.17987	0.976959	0.968891	0.973461	1.08414	1.00246	1.03123	0.971174	1.01231	1.16216	1.01596	1.05326	1.13233	1.02318	1.01653	1.07087	1.0148	1.02485	1.04327	1.12628	1.00035	1.11708	1.01393	1.16242	1.08061	1.10034	1.09491	1.3302	1.08551
37		1	1006001..1007000	0.962074	0.906562	1.05256	0.954504	0.947799	0.962199	0.895337	1.24063	0.830836	0.956965	0.996608	0.911316	1.07299	0.930363	0.943505	1.01288	0.97744	1.03076	1.02955	0.979423	0.996619	0.938364	0.896546	0.98926	0.901665	1.10577	1.05435	1.06003	1.00407	0.960705	0.891127	0.946238	1.00836	1.04356	0.843098	0.852985	1.00678	0.993426	1.00549	1.00419	1.06232	1.08118	1.06013	0.951404	0.875542	0.971472
38		1	1064001..1065000	1.24773	1.31797	1.36298	1.17486	1.2691	1.00643	1.1301	0.977146	0.873904	1.11469	0.88333	1.09105	0.942457	1.00694	0.959707	0.908034	0.947402	0.921272	1.0084	0.86375	0.932614	1.03858	0.983077	0.943845	0.889899	1.12786	1.10622	1.06127	1.09368	1.12051	0.874408	1.01917	1.13206	1.06044	0.989914	1.01259	1.10654	1.0171	1.08486	1.15475	1.08083	1.09133	1.03308	1.00858	1.11268	0.992112
39		1	1074001..1075000	0.846242	0.891946	0.815485	0.801862	0.803903	0.991695	0.972788	0.933309	0.773615	1.05301	0.875649	0.94587	0.9971	1.01717	0.958831	0.894079	0.936292	1.00263	1.0028	0.807064	0.939531	0.952844	0.839918	0.896019	0.910261	0.858708	0.999481	1.0122	0.845502	0.859553	0.900258	0.971554	0.897604	0.841198	0.768536	0.825361	0.887658	0.945775	0.994394	0.855124	0.900294	1.02083	0.860057	0.942585	0.831485	0.860835
40		1	1199001..1200000	0.790331	0.897283	0.771344	0.718935	0.781791	0.816591	0.875969	0.89107	0.657465	0.974685	0.741963	0.809455	0.986095	0.824232	0.769016	0.73862	0.683518	0.719601	0.777154	0.672849	0.672071	0.700779	0.756977	0.607524	0.710788	0.923571	0.962006	0.901252	0.858363	0.829419	0.814288	0.838334	0.938011	0.827413	0.819834	0.751628	0.926006	0.83666	0.850953	0.886278	0.916468	0.86222	0.876853	0.766879	0.894051	0.851985
41	clade IV unique CNV	1	1205001..1206000	6.58683	6.82989	6.61645	6.66953	6.89703	0.532809	0.591211	0.475009	0.673914	0.597911	0.520939	0.562079	0.515685	0.544142	0.768744	0.775425	0.20324	0.714702	0.647966	0.765462	0.685784	0.761771	0.751182	0.737008	0.774142	0.648483	0.637181	0.638762	0.587073	0.685744	0.570078	0.649472	0.663682	0.664884	0.638959	0.62694	0.647543	0.698866	0.639322	0.655114	0.625612	0.635904	0.669752	0.603661	0.872042	0.588645
42	clade IV unique CNV	1	1206001..1207000	23.626	24.008	23.2544	22.9073	23.3336	1.15649	1.0567	0.986919	0.999331	1.05772	0.896126	1.08052	1.08389	1.08901	0.860625	0.723226	0.763779	0.786008	0.785255	0.851799	0.733803	0.768531	0.744791	0.816881	0.740467	0.762824	0.60644	0.769501	0.686908	0.786324	0.760077	0.776181	0.759907	0.7816	0.763237	0.680374	0.73948	0.810806	0.760001	0.742025	0.765535	0.802779	0.844923	0.817764	1.58205	0.829138
43	clade IV unique CNV	1	1207001..1208000	13.1431	13.4828	13.4121	13.3144	13.7486	1.02685	1.20059	0.98139	1.04671	1.04441	1.0734	1.00206	1.20075	1.0409	0.0475631	0.00378963	0	0.00598702	0	0.00496118	0.00470465	0.0131366	0.00231232	0.0318023	0.0437547	0	0	0	0	0	0	0	0	0	0	0	0	0	0	0	0	0	0	0	0	0
44		1	1208001..1209000	0.130624	0.12938	0.13154	0.131822	0.118802	1.02049	0.92301	0.766375	0.952087	0.963435	0.926179	0.926267	0.929006	0.891059	0.000189495	0.000921547	0	0	0.00233058	0	0.000194507	0.0002557	0.000156106	0.000607225	0.000702464	0.000851853	0	0	0	0.00230456	0.00221848	0.00154812	0	0	0	0	0	0.00249423	0	0	0.000392504	0.00342731	0	0	0	0
45		1	1212001..1213000	3.71338e-05	0.000213443	0	0.000138739	0.000218615	0.896567	1.01552	0.830914	0.910348	1.13097	0.993685	1.10522	0.936126	0.87323	0.00262924	0	0	0.00375234	0.00229329	0	0	0.000399532	0.00148301	0	0	0.000791006	0.000921834	0.00519124	0	0.00490409	0.0022096	0.00315088	0.000710633	0	0.00947697	0	0.00307175	0.00319542	0	0	0	0.00126862	0.00224015	0	0.00529929	0
46		1	1329001..1330000	0.890815	1.02692	0.995148	0.873352	0.927834	1.03205	1.02208	1.0342	0.864862	1.02731	0.976717	1.10781	1.19085	1.07332	0.914844	0.920259	0.886515	0.818548	0.972522	0.983301	0.904763	0.879074	0.974316	0.813709	0.805691	0.993129	1.03961	1.02771	1.05156	0.962733	0.927128	0.970525	1.05714	1.06601	1.04414	1.00508	0.912418	1.03226	0.980705	1.02086	0.995079	0.944649	0.994177	0.965858	1.35288	1.01629
47		1	1481001..1482000	1.08015	0.787674	0.929824	0.765988	0.792519	1.03246	1.08348	1.1073	0.894536	1.09134	0.938635	1.06716	0.981312	0.843564	0.916088	0.806241	0.830378	0.814425	0.96072	0.823072	0.866676	0.905395	0.875832	0.823587	0.894702	0.999447	1.02176	0.909735	0.914852	0.960963	0.937901	0.980779	0.951141	0.885375	0.739225	0.837225	0.899094	0.921333	0.989045	0.968717	0.961706	0.966083	0.93992	0.982211	1.02297	0.94537
48		1	1592001..1593000	1.01998	0.970145	1.08705	0.945347	0.992958	1.07577	0.970317	1.00986	0.934204	1.08381	0.9299	1.10494	0.990039	0.906708	0.945838	0.863236	0.879436	0.888134	0.992062	0.898562	0.915254	0.904141	0.958217	0.875473	0.856769	1.14518	1.16981	1.02385	1.02549	1.07797	0.902911	1.10812	1.05786	1.11354	1.13405	0.988883	1.05903	1.06622	1.05296	1.18289	1.02712	1.06871	1.08179	1.0292	0.973541	0.990655
49		1	1598001..1599000	0.958212	0.827183	0.928225	0.929264	0.86791	1.11501	1.2091	1.02586	0.911348	1.04396	0.917937	0.977114	1.0076	0.997487	0.914465	0.960449	0.971596	0.955604	0.96856	0.966452	0.873581	1.01461	0.973135	0.997933	0.862292	1.07486	1.16309	1.12717	1.02786	1.08665	0.962438	0.977601	1.00916	1.1422	0.965177	0.961953	1.03144	0.97843	0.955951	1.00234	0.967081	0.987884	1.00746	0.91486	0.845313	0.981331
50		1	1599001..1600000	0.90823	0.851651	0.906768	1.05797	0.866021	1.11711	0.944081	1.04033	0.841071	1.11318	0.9793	1.05111	1.06289	0.963572	0.886053	0.984184	0.992297	1.03848	0.904665	0.8656	1.06392	0.974147	0.941729	1.03711	1.00709	1.10201	1.03605	1.04867	0.931564	1.07589	0.859509	1.03769	1.085	1.09381	0.928149	0.934309	1.14608	0.995089	1.03906	1.07589	0.996539	0.986646	1.03687	0.962738	0.818488	0.926849
51		1	1827001..1828000	0.791011	0.898923	1.02995	0.889644	0.908534	0.979037	0.913713	0.944701	0.842683	1.11645	0.890578	1.01056	1.13427	0.924389	0.840965	0.894173	0.917019	0.82303	0.955416	0.797804	0.865181	0.943606	0.89799	0.902672	0.89032	0.944299	0.976232	0.946243	0.95132	0.873242	0.84374	0.917188	0.912536	0.987266	0.878213	0.897339	0.89927	0.906348	0.938448	0.939348	0.967876	0.958287	0.996471	0.929174	1.23201	0.946336
52		1	1836001..1837000	1.21822	1.13317	1.0632	1.09565	1.05684	0.965706	1.01877	0.942817	1.12572	1.11661	1.04819	1.09054	0.982012	0.967478	1.12296	0.971179	0.985542	1.05166	1.07459	1.12318	1.02057	1.03973	1.0624	0.938271	0.989526	1.06204	1.03715	0.994046	1.07398	1.01141	0.925069	1.13911	1.03375	1.16818	1.07189	0.945757	1.0755	1.05007	1.06268	1.0911	1.08925	1.05102	1.06411	1.13326	1.02429	1.04222
53		1	2000001..2001000	0.897821	0.782562	0.89193	0.885472	0.852084	1.0471	0.951316	0.865152	0.644039	0.968188	0.78165	0.883819	0.83178	0.887497	0.730099	0.691771	0.766139	0.697254	0.729228	0.615281	0.737146	0.68415	0.837235	0.764859	0.667253	0.793815	0.788061	0.792644	0.825254	0.778396	0.740723	0.770262	0.791604	0.662079	0.807235	0.767348	0.74354	0.7545	0.782308	0.778079	0.83066	0.776169	0.846188	0.826304	0.623498	0.737764
54		1	2071001..2072000	1.10578	1.10455	1.06098	1.12578	1.18515	1.02265	1.03849	1.20814	1.10967	1.0642	1.15225	1.07363	1.13943	1.05869	1.03652	1.14197	1.11216	1.13686	1.15493	1.11472	1.18483	1.02981	1.0376	1.0075	1.12039	1.09007	1.11535	1.08685	1.1457	1.12968	1.05769	1.06861	1.12106	1.23057	1.16591	1.08858	1.15398	1.11366	1.09132	1.05442	1.11561	1.0494	1.17037	1.19604	1.91623	1.02622
55		1	2130001..2131000	1.05028	0.974909	1.03283	0.87355	0.940163	0.986805	1.01077	1.16716	0.88393	0.974665	1.00185	0.914577	1.14609	0.95424	0.911718	0.951996	0.936352	0.911556	1.05554	0.995925	0.842241	0.979684	0.972413	1.00323	0.933882	1.11219	1.10719	1.07761	0.963453	1.08367	0.897667	1.03044	1.10029	1.07886	1.14293	0.983798	1.05221	1.07911	1.05971	1.10999	1.03328	1.05169	1.08853	1.04179	1.75196	1.04539
56	clade I unique CNV	1	2211001..2212000	0.675191	0.58998	0.567742	0.582902	0.639223	0.83119	0.919029	0.670892	0.918134	0.804156	0.761038	0.646293	0.932506	0.848638	0.799833	0.793508	0.799945	0.854769	0.635828	0.913183	0.861327	0.778304	0.832455	0.757055	0.797727	0.643098	0.569053	0.651806	0.620171	0.631467	0.601713	0.647378	0.707196	0.646794	0.597379	0.70207	1.64242	1.60455	1.64947	1.70267	1.6575	1.63676	1.57405	1.71187	1.6381	1.6401
57		1	2230001..2231000	0.924743	0.807692	0.868864	0.843206	0.809446	0.992281	1.06044	1.26584	0.798559	1.10353	0.881376	1.03259	0.965198	1.00964	0.728062	0.820553	0.890384	0.974952	0.926367	0.816492	0.92239	0.797434	0.861168	0.860538	0.816641	0.896535	0.807284	0.94894	0.869651	0.877538	0.825611	0.87813	0.859205	0.872758	0.879225	0.846245	0.935769	0.874604	0.867821	0.900094	0.907792	0.916167	0.840871	0.930618	0.80934	0.899773
58		1	2341001..2342000	1.07381	1.09678	1.14791	1.00036	1.18107	1.12158	1.05353	1.07107	1.05597	1.08214	1.11706	1.13911	1.06113	0.96245	1.19952	1.10375	1.17094	1.30205	1.10645	1.19222	1.17614	1.17649	1.16147	1.025	1.00516	1.04474	1.11473	1.16183	1.1227	1.04668	1.1756	1.11475	1.13644	1.16683	1.12079	1.1248	1.06351	1.08326	1.02034	1.08724	1.05731	1.16358	1.02353	1.11615	1.03856	1.10738
59		1	2342001..2343000	0.983278	0.859514	0.967992	0.80538	0.883869	0.931426	1.01164	1.22546	0.782835	1.11681	1.02162	1.08453	1.03961	1.06308	0.989304	0.837545	0.845863	0.954947	0.954558	0.829421	0.805771	0.963056	0.89116	0.906315	0.929728	0.883777	0.971904	0.90095	0.989459	0.894444	0.929595	0.932714	0.94758	0.978553	0.9829	0.911483	0.906627	0.929327	0.965979	0.947495	0.981835	0.986268	0.847409	0.974537	0.859296	0.929253
60		1	2343001..2344000	1.06643	0.927805	1.00587	1.04629	0.990421	1.06996	1.02689	1.07803	1.007	1.04243	1.15956	1.15247	0.9843	1.09267	0.982316	1.01975	1.04425	1.09727	1.04147	0.923494	1.00042	1.027	1.02282	0.994281	1.08342	0.967259	1.04861	1.01449	0.984733	0.946103	0.98425	0.98933	0.988251	1.09627	1.0919	1.07858	1.01101	1.03856	1.12417	1.06461	0.974729	1.07096	1.08986	1.04628	0.805201	1.04292
61		1	2377001..2378000	0.898402	1.07468	0.933325	1.01383	0.981434	0.91345	0.969875	1.15979	0.998097	0.970888	1.0399	1.12337	0.964606	0.94206	1.05787	1.06674	0.888561	0.918451	1.00349	0.980127	1.02397	1.00442	0.983048	1.042	1.01625	1.01559	1.02161	1.07551	1.03533	1.13059	1.10071	0.989621	1.10304	1.08279	1.04506	1.10705	1.00335	1.02598	1.04276	0.983815	1.12341	1.06601	0.95707	1.22	1.15863	1.05603
62		1	2378001..2379000	1.02591	1.05862	1.05512	1.02381	1.06528	1.09596	1.18228	1.27547	1.0934	1.14046	0.996531	1.15242	0.901551	0.998637	1.08107	1.10199	1.07064	1.08691	1.0307	0.992793	1.00172	1.16138	1.24605	1.06308	1.12952	1.10401	1.02223	1.05685	1.0174	1.08114	1.08468	1.07607	1.1003	1.03594	1.04919	0.982599	1.13504	1.02966	0.976534	1.02634	1.19825	1.08525	1.01988	1.09847	1.20652	1.0725
63		1	2379001..2380000	1.0956	1.38878	1.2618	1.1794	1.19093	1.1311	1.05289	1.14997	1.14715	1.11382	1.09747	1.06168	1.11765	0.956866	1.19221	1.15282	1.26235	1.11317	1.137	1.22718	1.04052	1.12201	1.19605	1.16263	1.16532	1.19205	1.238	1.19886	1.24451	1.17439	1.12158	1.16017	1.09799	1.26926	1.19025	1.12719	1.17291	1.12723	1.07066	1.12338	1.15417	1.10369	1.26396	1.20169	1.60147	1.14931
64		1	2389001..2390000	1.10281	1.10945	1.09385	1.01757	1.13763	1.06768	1.08758	1.12735	1.05119	1.16446	1.09366	1.10559	0.994102	0.967895	1.04819	1.15874	1.19157	1.17935	1.06406	1.08753	1.15698	1.17448	1.06166	1.09907	1.09353	1.15749	1.1695	1.02861	1.15182	1.07691	0.976361	1.03028	1.03064	1.1954	1.00717	1.09967	1.12762	1.0579	1.21185	1.08257	1.06687	1.04783	1.17699	1.05657	1.07786	1.08431
65		1	2394001..2395000	0.957049	1.1205	1.13031	1.02571	1.04808	1.01592	0.998824	1.07273	0.993415	1.06318	1.09124	1.0267	0.920278	0.878814	1.05276	1.06544	1.12461	1.11554	1.14739	1.20076	1.06184	1.06984	1.08706	1.0309	1.05478	1.02417	1.0599	1.09196	1.09502	1.11942	1.05338	0.988884	1.02654	1.18182	1.02252	0.977177	1.10204	0.940857	0.98775	1.03418	1.09755	0.968333	1.03045	1.06927	1.01263	1.06032
66		1	2397001..2398000	0.886371	0.927726	0.935355	0.98682	0.912438	0.959828	0.981466	0.985084	0.922518	0.889558	0.924913	0.939991	0.990029	0.883684	0.907549	0.909924	0.882595	0.817975	0.850101	0.944064	0.86033	0.936303	0.876213	0.944534	0.929895	0.932749	0.912033	0.909052	0.971726	0.91701	0.841353	0.85702	0.942944	0.983183	0.834391	0.83778	0.876975	0.886094	0.860883	0.915173	0.895947	0.860122	0.868418	0.93886	1.30624	0.891129
67		1	2405001..2406000	0.885789	1.15987	1.00349	0.984511	0.995043	1.0719	1.08506	1.16104	1.02755	1.19299	1.03438	1.12501	0.925584	1.01826	1.06303	1.00529	1.04282	1.0348	1.01424	1.08936	1.05428	1.01258	0.977594	0.922656	1.10311	1.09795	1.15587	1.01487	1.03675	1.04715	0.976547	1.10747	0.985128	1.08418	0.947631	1.01597	1.07944	0.947999	0.990224	1.04996	1.04513	1.01678	1.02702	1.02794	1.19187	1.02174
68		1	2412001..2413000	0.86268	0.82533	0.871767	0.814209	0.837171	0.856128	0.821935	0.925562	0.80279	0.853256	0.926824	0.913564	0.840389	0.836755	0.761662	0.831922	0.75908	0.870053	0.784948	0.922937	0.746252	0.855454	0.836865	0.773034	0.731985	0.889213	0.87549	0.899424	0.845876	0.927611	0.876565	0.921404	0.934326	0.948861	0.906249	0.916022	0.906001	0.924369	0.905086	0.858533	0.846984	0.831036	0.883552	0.931093	1.60361	0.807693
69		1	2424001..2425000	0.885604	0.890441	0.962216	0.971371	0.923103	1.09709	0.919087	1.1223	0.851887	0.990008	1.01997	1.06851	0.89949	0.92527	0.904339	0.973793	0.933679	0.935671	0.930264	0.872179	0.975017	0.938285	1.06637	0.826986	0.916039	0.993849	0.996522	0.972545	1.07754	1.01659	0.874027	0.941666	0.97108	0.958315	0.851718	0.996822	0.958866	0.843351	1.02752	0.973246	0.943178	0.961039	0.830828	1.04169	1.82241	0.989457
70		1	2426001..2427000	0.986248	0.918627	0.903924	0.942672	1.0778	1.04789	0.988777	1.15782	0.901193	1.15391	0.972137	1.01768	1.12277	0.976235	1.03703	1.00092	1.02755	0.996139	0.975962	0.932943	0.93434	0.877955	1.10529	0.883059	0.972535	1.04267	1.13315	1.01681	0.985391	1.03465	0.98354	0.984103	1.03501	1.0237	1.02046	1.01793	0.91187	0.993025	1.07541	0.989977	0.940561	0.970001	0.969096	0.969229	1.67688	0.91757
71		1	2429001..2430000	0.892684	0.961574	0.950105	0.937855	0.978561	0.993934	1.05993	1.14521	0.982446	1.11804	1.02542	1.04823	0.957565	0.886189	0.946478	0.984617	0.924827	0.855857	1.0667	0.954049	0.900703	0.903174	1.02663	0.953479	1.03877	1.0628	1.04973	1.07876	1.00641	1.00289	0.844166	1.0114	0.988202	1.10532	1.02092	1.01114	0.993027	0.953959	0.944119	0.995912	0.980848	1.00189	1.11462	1.03711	1.74706	1.01149
72		1	2457001..2458000	0.957284	0.902113	0.97167	0.948479	0.983433	1.1054	0.930795	1.16508	0.861147	1.0937	1.00581	0.965298	0.931422	0.942441	0.899424	0.936198	0.931653	0.875156	0.955164	0.787587	0.832236	0.902119	0.914537	0.877214	0.833579	0.904536	0.975087	1.01973	0.924028	0.968024	0.987036	0.889012	0.957818	1.00215	1.02079	0.867505	0.942011	0.973332	0.980053	0.879394	0.983858	0.927973	0.877303	0.993387	1.72409	0.951261
73		1	2501001..2502000	1.11765	1.12943	1.05074	1.18437	1.06559	0.915864	1.01251	1.11774	0.944028	0.964108	1.06293	1.02229	0.982485	1.05126	1.17317	1.06681	0.999842	0.9739	1.11689	1.01045	1.16081	1.00018	0.952734	1.08481	1.17566	1.10866	1.11096	1.09004	1.08103	1.02265	0.905911	1.10602	0.958462	1.16799	1.06283	1.10143	1.05015	1.04628	1.08973	1.04563	1.05395	1.06809	1.11537	1.04048	1.83711	1.01125
74		1	2505001..2506000	1.09314	1.08043	1.0777	1.1147	1.23888	1.15241	1.12614	1.20888	1.05753	1.20172	1.13605	1.0354	1.09696	1.03222	1.22185	1.02901	1.08678	1.05809	1.11084	1.17825	1.08494	1.0847	1.17365	0.942359	1.26372	1.22441	1.11244	1.07788	1.16246	1.13895	1.05426	1.18862	1.19471	1.12405	1.03103	1.11696	1.1191	1.12676	1.14502	1.0011	1.13916	1.0719	1.03597	1.1217	2.09608	1.13884
75		1	2506001..2507000	1.01473	1.08928	1.0006	0.978288	0.968153	1.18904	1.03354	1.16251	1.02078	1.05671	1.06398	1.08433	1.1803	0.909417	0.958191	1.01021	1.09057	1.03204	0.976521	1.0005	0.86822	1.12046	0.995429	0.969485	1.0187	1.0672	1.07139	1.02277	0.943638	1.06846	0.948159	1.00404	1.06697	1.03646	0.954623	0.995593	1.06742	1.02273	1.08477	1.05579	0.982318	1.06922	1.0478	1.01841	1.77485	1.04681
76		1	2507001..2508000	0.875763	0.863311	0.908357	0.79872	1.0923	1.08404	1.0669	1.16827	0.969511	1.02727	1.04933	0.938813	1.01906	1.00516	0.909906	0.988961	0.968649	0.933317	1.03071	0.955164	0.829926	0.938612	1.02294	0.987647	0.945569	1.03104	1.07732	0.981729	1.01499	1.04573	0.843385	1.02226	1.14985	1.09315	0.968805	1.06309	1.04827	1.08263	1.04663	1.06701	0.98737	1.08506	0.993502	1.12457	1.67291	1.02985
77		1	2513001..2514000	1.16737	1.08259	1.08874	1.19612	1.16641	0.97329	0.954036	1.09152	1.07896	0.90472	1.09153	1.05669	0.888169	0.992793	1.14919	1.20072	1.13142	1.13723	1.14314	1.04487	1.20541	1.24409	1.17093	1.12926	1.07329	1.1519	1.17852	1.10199	1.03608	1.13656	1.02941	1.18221	1.16628	1.15181	1.20177	1.27162	1.12714	1.17667	1.07257	1.10921	1.16618	1.0998	0.995024	1.12732	1.48904	1.08778
78		1	2514001..2515000	0.838877	0.767543	0.899775	0.829391	0.980372	0.913983	1.12211	1.36161	0.830747	1.11558	1.02029	1.14877	1.05216	0.925233	0.789967	0.970229	0.982332	0.978333	1.00253	0.854773	0.947482	0.858035	0.946158	0.90317	0.811486	0.978739	1.04841	1.00828	0.897915	1.01017	0.998652	0.983074	0.925244	1.06896	0.918056	0.964718	1.02246	0.888398	1.02464	1.03026	0.997414	0.995404	0.982976	1.08565	1.74756	0.960951
79		1	2520001..2521000	0.941341	0.973549	0.944475	1.01043	1.03752	1.14263	1.00177	1.26378	0.987806	1.06388	0.991586	1.02248	1.04582	0.806616	0.997819	0.98235	1.03328	1.04236	1.00028	0.971477	0.959638	0.961242	0.980453	0.93267	1.00053	1.13967	1.13885	1.01167	0.982916	1.12283	0.982226	1.02769	0.974749	0.949193	1.02723	1.05762	1.0769	1.00598	1.06373	0.959668	1.11325	1.06994	1.04879	1.01544	1.60775	1.02769
80		1	2521001..2522000	0.917551	1.03689	0.98083	1.01414	1.01548	1.12566	1.06437	1.31084	0.894327	1.07015	1.07582	1.08413	0.954133	0.980891	0.925184	0.974583	0.9981	1.02757	1.09766	1.06956	0.934547	0.94411	1.05987	1.07279	1.0121	1.28692	1.08636	1.03576	1.03042	1.1511	0.979759	1.13083	1.04499	1.17128	1.01758	1.04373	1.11798	1.17078	1.12133	1.1133	1.07819	1.06669	1.14668	1.07316	2.02027	0.992648
81		1	2522001..2523000	1.05949	1.17702	1.17332	1.1287	1.02213	1.02402	1.00874	1.30776	0.983188	1.09322	1.13212	1.19698	1.1332	0.998544	1.20869	1.23769	1.05723	1.20329	1.06898	1.12293	1.02857	1.13076	1.04591	1.12106	1.2645	1.21525	1.22894	1.13552	1.16942	1.0633	1.08297	1.11035	1.16736	1.18298	1.1603	1.17217	1.07886	1.16173	1.18757	1.06261	1.10219	1.13251	1.18955	1.10364	1.46626	1.11498
82		1	2523001..2524000	0.905309	0.980559	0.915565	0.982579	1.11898	1.11372	0.908781	1.36315	0.982753	1.02703	1.03838	1.08665	1.03746	0.923239	1.12884	1.09106	1.1877	1.00485	0.980204	1.03524	0.990395	1.00003	0.976101	1.0768	1.01263	1.06934	1.19388	1.00277	1.06421	1.01645	0.975491	0.976827	1.16025	1.07327	1.07558	1.06155	1.01323	0.996801	1.06718	1.11046	1.03036	1.00257	1.06386	1.08215	1.69683	1.01483
83		1	2528001..2529000	1.33188	1.12803	1.24391	1.17241	1.09105	1.16786	1.05462	1.20166	1.15287	1.14717	1.14139	1.13201	1.11703	0.962775	1.07618	1.17131	1.16943	1.0494	1.08793	1.12644	1.12555	1.14978	1.13902	1.16577	1.16313	1.12143	1.20777	1.16584	1.04978	1.22892	1.0173	1.15836	1.03504	1.24305	1.19223	1.0882	1.0863	1.05165	1.02405	1.10557	1.13345	1.10664	1.07995	1.09311	1.38232	1.05042
84		1	2529001..2530000	1.08298	1.01957	1.0851	1.0531	1.06073	0.927804	1.08628	1.26558	1.05483	0.949882	1.09899	1.13084	1.1961	0.971467	1.11111	1.0696	1.20666	1.22347	1.1287	1.00447	1.16579	1.06476	1.16689	1.07681	1.09273	1.17967	1.20889	1.12439	1.11641	1.08066	1.03738	1.07328	1.08362	1.15698	1.08369	1.20028	1.04314	1.10227	1.13814	1.12774	1.11338	1.16389	1.17322	1.15104	1.59151	1.12308
85		1	2530001..2531000	1.16382	0.960877	1.09418	1.07238	1.12424	1.10844	0.9759	1.37844	1.16498	1.11471	1.14292	0.93965	1.09436	0.878824	1.18588	1.07181	1.22676	1.19275	1.14954	1.14703	1.00119	1.11274	1.17984	1.12715	1.12734	1.18439	1.17038	1.08683	1.05083	1.14389	1.04455	1.09679	1.08343	1.12503	1.03945	1.15435	1.09048	1.08296	1.13185	1.11606	1.08972	1.08104	1.02718	1.16479	1.90811	1.16337
86		1	2531001..2532000	1.00417	1.03144	0.907219	0.995809	1.00397	0.942255	1.04904	1.47812	1.06818	1.12181	1.03687	1.05205	1.01468	0.865577	1.04665	0.954083	1.06261	1.04492	0.994094	0.98307	0.988049	1.03047	1.07313	1.03116	0.892041	1.21494	1.15558	1.0023	0.970861	1.07116	0.928193	1.02135	1.04861	1.12672	0.916759	1.04002	0.969774	1.00397	1.09031	1.02477	1.06779	1.04547	1.03575	1.10017	1.80085	1.11326
87		1	2532001..2533000	0.963844	0.968224	0.982556	1.10715	0.903014	0.9344	1.04512	1.22844	1.03799	0.984083	1.15106	1.19643	1.09203	0.962274	1.05778	0.953491	1.08432	1.04266	1.07529	1.12919	1.14831	1.09166	1.0847	1.08942	0.988937	1.04722	1.1366	1.04566	1.09343	1.1891	0.954522	1.01833	1.03864	1.24782	1.00761	1.12867	1.13465	1.12894	1.12407	1.10369	1.16297	0.987035	1.11178	1.20019	1.40234	1.15694
88		1	2533001..2534000	0.918083	1.06105	0.991186	0.94612	1.02788	0.978224	1.04921	1.2173	1.00743	1.01886	0.88214	0.935747	0.936343	0.917562	1.00889	1.03006	1.16109	0.88241	0.887419	1.03416	0.925053	1.0489	1.04224	1.06198	1.01487	0.965575	0.989195	0.891739	0.989616	0.995347	0.870175	0.975688	0.893894	1.14108	1.09317	1.04192	0.892696	0.986384	0.998699	0.943412	0.976772	0.986166	0.988775	1.04381	1.61381	1.01938
89		1	2534001..2535000	1.01586	1.0396	1.09273	1.00951	0.91357	1.16578	0.954061	1.26782	0.944455	0.970713	1.0307	1.12456	1.04061	1.06774	0.955124	0.962387	1.0403	1.09684	0.980614	0.971781	0.822085	1.04959	1.15049	1.02372	1.01055	0.97668	1.07554	0.984684	1.12756	1.11458	0.978517	1.09953	0.929566	1.12689	1.08154	0.993799	1.0836	1.04473	1.1792	1.0309	1.02247	1.07566	1.05707	1.10102	1.41195	1.00044
90		1	2535001..2536000	1.13358	1.14797	1.0944	1.15343	0.902537	1.17986	1.14635	1.2571	1.06659	0.983861	1.17093	0.943573	1.14875	0.959472	1.0398	1.19212	1.10857	1.16471	1.07237	1.11464	1.03106	1.13238	1.07868	1.03611	1.1567	1.23514	1.25515	1.12219	1.14115	1.31685	1.01762	1.12168	1.07615	1.26145	1.19755	1.15418	1.22408	1.11197	1.11427	1.14411	1.13738	1.16335	1.10155	1.19454	1.10867	1.09394
91		1	2536001..2537000	0.858917	0.951037	1.00936	0.918799	0.956449	1.07826	1.08334	1.46249	0.918214	1.11381	1.0051	0.95938	1.0152	0.978414	0.898868	0.874257	0.860052	1.04643	0.98521	0.887452	0.921503	0.945133	0.958559	0.976382	0.936867	1.01981	1.05043	0.962127	1.03952	0.983419	0.885998	0.931795	0.947993	1.02079	1.08941	0.981608	0.999259	0.955041	0.95604	0.984973	0.94498	1.01305	1.06705	0.996367	1.68061	0.996957
92		1	2537001..2538000	0.774078	0.906854	0.952605	0.971064	0.823102	0.962942	1.01592	1.50672	0.983655	1.03716	1.02849	1.11151	1.02543	1.03337	1.03592	1.00369	1.0534	0.987834	1.05423	1.02579	0.895475	1.03395	0.861529	0.91874	1.00428	1.02099	0.964257	0.998448	0.993074	1.04741	0.93523	1.00469	0.990317	1.03217	0.958251	0.977346	1.00244	1.04028	0.99026	1.00495	0.98428	0.975423	1.00204	1.06217	2.09966	1.04685
93		1	2538001..2539000	0.776146	0.995658	0.948634	1.02855	0.930622	1.03195	1.00009	1.2906	1.01512	1.06113	1.17437	1.15911	1.01711	0.986986	0.94251	0.999606	1.06289	1.04958	1.05502	0.989398	0.919436	0.972756	1.03439	1.05958	1.02715	1.05225	1.14073	1.02374	1.06136	1.16884	0.868436	1.07087	1.04014	1.08644	1.02224	1.07283	1.08008	1.04952	1.01801	1.10341	1.02654	0.995875	1.03924	1.09579	1.27283	1.03509
94		1	2539001..2540000	0.952568	1.25309	1.07277	1.15126	1.02241	1.11198	0.891207	1.42595	1.06468	1.07149	1.14978	1.07486	1.06804	1.04326	1.18934	1.15904	1.16269	1.1263	1.13438	1.16177	1.2062	1.09461	1.11688	0.99981	1.16944	1.14623	1.15837	1.09701	1.11994	1.16578	1.05693	1.21928	1.1322	1.26632	1.14034	1.22088	1.06798	1.21673	1.14946	1.17645	1.12271	1.15861	1.16156	1.18168	1.5388	1.13143
95		1	2540001..2541000	1.48462	1.28057	1.43211	1.44352	1.41406	1.07167	1.05205	1.31176	1.33567	1.05414	1.16007	1.081	1.04511	1.02343	1.35811	1.38496	1.42342	1.53171	1.1311	1.43088	1.40285	1.40454	1.31638	1.27954	1.33211	1.07938	1.22856	1.09546	1.16416	1.16288	1.11681	1.27481	1.17171	1.32845	1.17442	1.29651	1.12263	1.21369	1.21528	1.12971	1.15109	1.06984	1.14073	1.23251	1.48421	1.26546
96		1	2541001..2542000	1.15083	1.03241	1.29008	1.13131	1.15922	0.983796	1.04218	1.51303	1.15557	1.05605	1.06082	1.05551	1.08619	0.935576	1.05945	0.992619	1.09553	1.19783	1.04643	1.189	1.23746	1.20631	1.17195	1.06128	1.24477	1.07832	1.17774	1.06648	1.03578	1.11049	0.980052	1.16316	1.08204	1.16656	1.16828	1.09625	1.0993	1.03394	1.07626	1.07133	1.0819	1.05051	1.11145	1.15032	1.58097	1.10572
97		1	2542001..2543000	1.08072	1.09088	1.03212	1.07031	1.02585	0.93747	1.14245	1.37132	0.951475	1.1266	1.04078	0.974077	0.956263	0.875465	1.0778	1.02883	1.00353	1.04117	1.06622	1.06518	1.19804	1.10998	1.09506	1.07267	1.04873	1.0471	1.11807	1.05911	1.05556	1.13239	0.977106	1.08308	1.02694	1.14599	0.96465	1.0221	0.984125	1.09721	1.06113	0.97637	1.21517	1.1128	1.09337	1.13132	1.38013	1.15046
98		1	2543001..2544000	1.05027	1.01127	0.973435	1.04278	0.853864	0.948413	0.998949	1.13575	0.919592	1.03896	1.01981	1.06409	0.98432	0.982329	0.967204	0.901706	1.08978	0.952426	1.06727	0.807505	0.975454	0.927505	0.918771	0.958971	0.941056	1.002	1.00788	1.01736	1.02566	1.08457	0.966457	1.13215	0.994705	1.07276	1.0072	1.00881	1.01236	1.05526	1.03291	0.985828	1.14123	1.02893	1.06519	1.20235	1.42647	1.05312
99		1	2546001..2547000	0.951009	1.05775	0.986616	0.861341	1.00063	1.01709	0.953219	1.21299	1.03917	0.998834	1.06726	1.03656	0.905998	0.988618	0.904884	0.907564	1.02614	0.886616	0.972942	1.03383	0.996048	0.856245	1.03624	0.967608	0.936121	0.983647	1.14435	0.98637	1.11458	1.06532	0.974062	1.048	1.0505	1.08481	0.960999	1.05247	1.0912	1.01756	1.12763	0.997669	1.18782	1.12893	1.06294	1.20489	1.3746	1.03704
100		1	2548001..2549000	1.02884	0.888048	0.95593	1.00248	1.10057	0.971585	0.944682	1.43412	0.955932	1.0866	1.05055	1.08784	0.920909	0.97091	0.992679	0.947331	0.986848	0.985181	1.01425	1.04828	0.970142	0.871571	0.935875	0.895059	0.918937	0.97954	1.07316	1.07325	0.942616	1.07863	0.897676	1.01684	0.993333	1.08513	0.889274	1.02219	1.03718	0.953648	0.997681	1.04683	1.14699	0.997829	1.01845	1.16436	1.76747	1.13888
101		1	2549001..2550000	1.20206	1.07328	1.10833	1.11571	1.07309	1.04923	0.980799	1.28592	0.964498	1.07519	1.18375	1.01534	1.01687	1.14385	1.06225	1.02344	1.00131	1.01328	1.06658	1.03821	0.96692	1.04837	0.918137	0.910312	1.14056	1.0746	1.07614	1.01391	1.09803	1.12288	0.919479	1.05858	0.971403	1.10535	1.0778	1.05596	1.04676	1.0754	1.07158	1.1526	1.0287	1.07978	1.07405	1.29664	2.02787	1.10792
102		1	2550001..2551000	0.953558	0.999612	0.864824	0.900782	0.943481	1.04031	1.00966	1.38466	0.825396	1.03957	1.09155	1.03685	0.893405	0.972663	0.875311	0.953538	0.938986	0.91342	1.02422	1.01123	0.888351	0.955752	0.807263	1.00462	0.861405	1.02828	1.02909	0.98598	0.928174	0.943043	0.828708	0.962702	0.988689	0.962032	0.948576	0.955054	0.964667	0.956162	1.01243	1.00838	0.968429	1.01321	1.00258	1.15019	1.83847	1.08713
103		1	2552001..2553000	0.485202	0.426235	0.470115	0.486934	0.495156	0.662427	0.65808	0.852767	0.568652	0.819802	0.653359	0.712889	0.610287	0.618872	0.501296	0.629981	0.457755	0.577562	0.51942	0.514407	0.58723	0.574838	0.581719	0.524479	0.459403	0.637206	0.61366	0.622194	0.582082	0.626535	0.545284	0.634692	0.530463	0.588585	0.649579	0.600535	0.664858	0.663366	0.635937	0.608007	0.685434	0.73146	0.599449	0.781817	1.0532	0.677641
104		1	2554001..2555000	1.09267	1.06815	1.01209	1.02927	1.03075	1.16511	1.10293	1.16258	1.04819	1.06625	1.08145	1.02977	1.0586	0.931884	1.03832	1.01747	0.956111	1.02924	1.02588	1.07917	1.09506	1.10448	1.02481	1.07879	1.03976	1.05745	1.16209	1.04539	1.07328	1.11184	1.00659	1.05194	1.08164	1.08333	1.06459	1.03432	1.02922	1.0978	1.14905	1.0518	1.05772	1.02477	1.13218	1.33121	1.65951	1.12384
105		1	2555001..2556000	1.02671	0.966528	0.914319	0.996096	0.970886	0.94683	1.07266	1.15648	0.803942	1.11203	0.89017	0.94077	1.03688	0.980576	0.849007	1.04657	0.900116	0.966347	0.884119	0.990197	0.871368	0.93238	0.963232	0.963711	0.828776	0.849237	0.931062	0.803878	0.940582	0.973629	0.769182	0.889941	0.914279	0.922834	0.929996	0.913554	0.766207	0.938973	0.966435	0.938968	0.931141	1.03001	1.00551	1.08262	1.88221	0.926581
106	clade II unique CNV	1	2556001..2557000	0.92145	0.988591	0.842895	0.798948	0.863444	1.57137	1.49667	2.17256	1.24566	1.73278	1.78447	1.69192	1.80669	1.45396	0.874814	0.871727	0.846724	0.903502	0.926302	0.804836	0.842861	0.82306	0.87272	0.810392	0.76803	0.911645	0.994785	0.92845	0.916081	0.972845	0.794898	0.931248	0.922394	0.869697	0.970191	0.913267	0.819532	0.964607	0.976517	0.9028	0.956745	1.07484	0.979396	1.1539	1.64464	1.0156
107	clade II unique CNV	1	2557001..2558000	0.826375	0.672852	0.793743	0.755077	0.75726	1.81471	1.91966	2.16966	1.48974	2.12797	1.75052	1.84991	2.10859	1.86315	0.851956	0.814478	0.873926	0.751783	0.991959	0.965128	0.827714	0.721722	0.913386	0.800585	0.817071	0.859621	0.980074	0.967389	0.930454	0.979187	0.813462	0.912097	0.955149	0.91887	0.810072	0.913624	0.901207	0.940406	1.0205	0.89736	0.98735	1.05486	0.958409	1.11372	1.55339	0.980098
108	clade II unique CNV	1	2558001..2559000	0.910099	0.836283	0.894499	0.83834	1.01384	1.8609	1.84445	1.9184	1.53427	1.68481	1.75923	1.75695	1.80287	1.67072	0.917166	0.860706	0.800957	0.887787	0.917921	0.908747	0.93513	0.777401	0.876291	0.785133	0.756194	0.902761	0.986149	1.01254	0.983515	0.947329	0.7896	0.94428	0.936714	0.937753	0.822869	0.929096	0.942304	0.853017	1.07708	0.922741	0.957862	0.907511	0.959299	1.07481	1.80947	0.912421
109	clade II unique CNV	1	2559001..2560000	0.804404	1.03171	1.039	1.04627	0.947939	1.83881	2.25888	2.57648	1.90021	2.23343	2.02629	2.30114	2.08375	1.79692	0.824515	0.910846	1.01704	0.951505	0.972401	1.01874	0.973582	1.02104	0.963174	0.830403	1.02453	1.05556	1.05251	1.03488	1.10405	0.952261	0.952499	0.958267	1.07549	1.0417	1.022	0.974184	0.996001	0.995199	1.12268	1.06748	1.15637	0.999077	1.06219	1.18606	1.55708	1.05807
110	clade II unique CNV	1	2560001..2561000	1.04446	1.13543	1.19784	1.1996	1.1623	0.87644	1.81997	2.13697	1.92751	1.6863	2.05742	1.88802	1.73311	1.67235	1.13261	1.04489	0.976417	1.0479	1.04608	1.12414	1.15531	1.12083	0.84107	1.10142	1.10866	1.17238	1.1981	1.13504	1.20056	1.21529	0.983584	1.1013	1.12792	1.22616	1.1554	1.17576	1.18714	1.14635	1.19677	1.20797	1.12702	1.19103	1.26382	1.32018	1.74695	1.15929
111		1	2561001..2562000	1.04504	1.01756	1.06954	1.21301	1.14364	1.10969	1.1311	1.32105	0.945994	0.915963	1.13279	1.05336	1.04387	0.947153	0.989458	1.04804	1.0566	1.02972	1.07649	1.08718	0.982943	1.04947	0	0.994925	1.11674	1.1207	1.18678	1.15929	1.23907	1.24411	0.960379	1.06114	1.1165	1.19838	0.990156	1.13123	1.16895	1.14685	1.27979	1.19325	1.10035	1.24187	1.17002	1.31146	1.86129	1.19791
112		1	2562001..2563000	0.931835	1.12812	1.09187	1.0694	1.04751	1.08076	1.01488	1.28002	1.00034	1.0244	1.14496	1.05172	1.04415	0.875465	1.04331	0.975476	1.10883	1.06783	1.10253	1.03906	1.21032	0.91842	0	0.961128	1.02208	1.1011	1.13917	1.12845	1.1936	1.17775	0.985093	1.01859	1.09606	1.26489	1.24438	1.14746	1.08098	1.17187	1.1861	1.10813	1.06249	1.15962	1.1481	1.29445	2.03084	1.26919
113		1	2563001..2564000	0.991336	1.05244	1.1369	1.11105	1.02037	1.05141	1.02423	1.23477	1.07473	1.03497	1.18081	1.05061	1.20192	0.97424	1.17596	1.10876	1.14536	1.10201	1.0997	1.0595	1.13496	0.976632	0	1.03474	1.04299	1.05142	1.15259	1.0883	1.1084	1.19581	0.938398	1.01317	1.08682	1.27516	1.00588	1.15897	1.11187	1.11386	1.1882	1.14806	1.08803	1.21209	1.15616	1.25331	1.70107	1.09842
114		1	2564001..2565000	0.834359	0.84673	0.877818	0.891665	0.99395	1.03472	1.03262	1.39182	1.09536	1.05562	1.16703	0.96192	0.848081	1.02936	1.00523	1.00325	0.956435	0.983568	0.929938	0.999425	0.956526	0.944373	0	0.863628	0.902754	1.05266	1.06933	1.05919	1.12884	1.13763	0.873361	0.993401	1.01029	1.16333	0.963572	1.03712	1.0715	0.994498	1.06109	1.12524	1.16232	1.00206	1.16571	1.09043	1.85717	0.997833
115		1	2565001..2566000	0.898217	0.813804	0.845229	0.858754	0.900804	0.875206	0.822811	1.04917	0.919246	0.932027	1.02317	0.847056	0.782195	0.818314	0.907809	0.903248	0.887963	0.968116	0.85329	0.930568	0.932967	0.849373	0.189776	0.983061	0.927788	0.923175	0.849038	0.845852	0.867489	0.921002	0.773752	0.951638	0.945051	1.02288	0.874388	0.867624	0.949719	0.851124	0.929233	0.922285	1.00275	0.903081	0.979503	0.96312	1.70242	0.946461
116		1	2566001..2567000	0.992066	1.01627	1.02997	0.84164	1.01699	1.0805	1.00978	1.25003	0.908535	0.939729	1.11511	0.880081	0.974093	0.997088	0.94893	1.06724	1.00275	0.966515	0.947165	1.03675	0.924797	0.990112	0.0207914	0.899599	0.943988	1.07983	1.108	0.982031	1.06609	1.11778	0.848585	1.05506	1.09526	1.13363	1.00491	1.00988	1.20143	1.03891	1.21871	1.12909	1.05919	1.12584	1.21231	1.12552	1.90968	1.04187
117		1	2567001..2568000	1.05785	1.14433	1.02006	1.09852	1.13135	0.974174	0.974557	1.15843	1.014	0.861194	1.10944	0.956723	0.939942	0.983934	1.16725	1.12471	0.965601	0.88621	1.05589	1.0623	0.99358	0.993012	0.00075126	0.936459	1.04107	1.21937	1.21562	1.13358	1.17646	1.24164	0.870202	1.11926	1.16163	1.30031	1.12976	1.19085	1.17682	1.14026	1.32633	1.23816	1.2551	1.16883	1.31226	1.24347	1.80396	1.0898
118		1	2568001..2569000	0.766577	0.770419	0.775973	0.917917	0.885806	1.18586	0.986715	1.24714	1.02641	0.977398	1.17564	1.01041	1.10988	0.986541	1.06742	1.1218	1.02127	1.06069	0.991008	1.05292	0.959067	0.964246	0	1.0428	1.00899	1.07652	1.10637	0.972137	1.14594	1.14394	0.776387	1.03785	0.995713	1.18165	1.03646	1.07795	1.18459	1.03965	1.1229	1.16844	1.05284	1.12999	1.19196	1.11412	1.65833	0.945889
119		1	2569001..2570000	0	0	0	0.00175406	0	1.02966	1.09265	1.1184	1.11005	0.943567	1.19041	1.07174	0.999743	0.839566	0.510392	0.601827	0.487348	0.519663	0.481348	0.572428	0.474172	0.513974	0	0.560215	0.483014	0.514286	0.545279	0.519789	0.545163	0.589155	0.427376	0.512436	0.501418	0.566343	0.550741	0.560532	0.353281	0.330621	0.366306	0.383318	0.336809	0.356277	0.403967	0.353126	0.591392	0.279314
120		1	2570001..2571000	0.00295832	0	0	0	0	1.05396	1.15552	1.40797	1.00636	0.997865	1.15433	1.16056	1.07422	1.03869	0.937477	1.08081	0.869703	0.988838	1.02657	0.992782	1.01134	1.09489	0	1.10973	0.973132	1.05128	1.21618	1.04219	1.15483	1.17443	0.845142	1.06248	1.05845	1.25381	0.961175	1.06108	0	0	0	0	0	0	4.28737e-05	0	0	0
121		1	2571001..2572000	0.861454	0.963888	0.890743	0.888891	0.876647	0.945351	0.967555	1.23847	1.03586	1.02263	1.1035	0.974155	0.938078	1.09949	1.02737	1.03546	1.0356	0.993355	1.01548	1.0515	0.973716	1.05474	0.00228305	0.867616	0.989526	0.974418	1.08383	1.04504	1.032	1.17178	0.772376	1.00083	1.0269	1.16106	1.05625	1.08694	0.868817	0.796952	0.785844	0.812034	0.785482	0.890508	0.829906	0.721069	0.601217	0.760371
122	clade II unique CNV	1	2573001..2574000	4.60498	4.59008	5.34884	4.59107	5.91431	1.15579	1.07935	1.38635	0.989087	0.977425	1.19053	1.03622	1.07807	0.972005	5.88494	6.79149	7.07645	6.93166	6.75827	6.7222	6.87176	6.73065	6.0367	5.63655	5.92248	7.62899	8.24378	7.42123	6.85844	7.80091	5.74106	7.41666	8.65319	7.94277	6.98367	6.90914	4.9489	4.87492	5.04356	4.98576	4.92325	4.92261	5.0136	5.38358	7.65633	4.8028
123	clade II unique CNV	1	2574001..2575000	5.14882	5.1714	5.85045	5.25592	6.09566	0.928504	1.10555	1.28458	1.15818	1.10777	1.16805	1.04204	0.976105	1.0134	6.25447	7.95623	7.71352	8.10818	7.36572	7.0008	7.19686	7.09602	7.43076	6.78356	7.09085	9.34791	9.9189	8.53864	7.77538	9.06658	6.17997	8.67809	10.2715	9.16346	7.90663	8.06845	6.02786	6.08969	6.24324	6.4912	6.23791	5.84857	6.42228	6.48744	8.75833	6.05523
124	clade II unique CNV	1	2575001..2576000	4.12865	4.28381	4.63168	4.42334	4.79122	0.985738	0.997939	1.14095	1.16714	1.07495	1.40853	1.0495	0.919351	0.962339	4.54646	5.42061	5.69825	5.66385	3.84133	5.07511	5.0401	4.73412	4.74465	5.11951	5.35021	5.27342	5.82489	4.5069	4.10043	5.08283	3.32419	4.56966	5.56432	4.98838	4.71443	4.47802	3.85092	3.71889	3.8263	3.85777	3.86951	3.7343	3.92173	3.86531	6.00471	3.70499
125	clade II unique CNV	1	2576001..2577000	3.79247	3.88503	3.75537	4.01337	3.95266	0.983927	0.89593	1.02711	1.3472	0.93091	1.31652	0.809835	0.908917	1.01017	6.10278	6.94451	6.59264	6.41601	6.43473	6.96729	6.43914	6.24639	5.15057	5.5274	6.11188	8.79356	9.18609	7.10809	6.28215	8.14568	5.00907	7.12357	9.05595	7.79736	6.88228	7.58968	5.66085	5.41818	5.69849	5.62197	5.64023	5.53047	6.0419	5.80756	6.69661	5.329
126	clade II unique CNV	1	2577001..2578000	2.44519	2.36392	2.3451	2.54076	2.56466	1.0545	1.05514	1.25086	0.907713	1.06994	1.28001	1.18504	1.02336	0.910243	4.76243	4.96351	4.63442	5.01907	5.54609	5.22519	4.85789	4.58039	3.4633	4.43226	4.227	7.28176	7.5384	5.9588	5.53504	7.24017	4.34799	6.02226	7.33205	6.60364	5.81624	6.55099	5.73731	5.49226	5.74767	5.79767	5.73752	5.59153	5.91075	5.83055	5.41689	5.23707
127		1	2578001..2579000	0.882447	0.876725	0.818731	0.885363	0.881488	0.890042	0.916776	0.819287	0.5795	0.9245	1.02822	0.865598	0.890969	0.831291	1.57238	1.23699	1.32183	1.35598	1.35281	1.34081	1.17795	1.34263	1.35017	1.54255	1.23377	1.45501	1.53814	1.52619	1.33066	1.77998	1.19231	1.22311	1.50901	1.39007	1.60123	1.67093	1.52644	1.53016	1.49139	1.53317	1.48896	1.50983	1.5871	1.69464	0.62636	1.39578
128		1	2579001..2580000	0.898959	1.21017	0.990744	1.06917	1.03965	0.966809	1.00236	1.22823	0.953989	1.06718	1.1469	1.11526	1.04499	0.980854	1.01977	1.11362	1.1563	1.05308	1.21991	1.17395	1.0656	1.04883	1.00224	1.17352	1.13004	1.29424	1.32418	1.46891	1.28617	1.31286	0.975109	1.3564	1.50126	1.2974	1.23761	1.17943	1.12146	1.17409	1.22658	1.06603	1.21058	1.12213	1.21268	1.31484	1.38543	1.25955
129		1	2581001..2582000	1.09953	1.14618	1.20079	1.04361	1.14997	0.990636	0.999542	1.20164	1.07298	1.07016	1.11899	0.941334	1.0319	1.04989	1.00636	1.02867	1.12254	1.04649	1.2023	1.01973	1.04742	1.14772	1.0192	1.19317	1.17793	1.16564	1.40431	1.34934	1.12272	1.16438	0.991384	1.22514	1.53617	1.21031	1.21549	1.09399	1.18041	1.13783	1.16989	1.16094	1.17465	1.10686	1.25515	1.35721	1.60476	1.22234
130		1	2582001..2583000	1.06458	1.37878	1.05042	1.04795	1.14023	0.961394	1.07604	1.25132	1.10097	1.0529	1.07602	0.890486	1.05817	0.955066	1.09985	1.03737	1.05945	1.12499	1.2532	1.02241	0.964732	1.09004	0.919776	0.964844	0.987199	1.19897	1.35975	1.26562	1.18756	1.22068	1.02393	1.30473	1.37557	1.21876	1.10977	1.05409	1.10993	1.11219	1.25204	1.05076	1.17824	1.11915	1.19714	1.29283	1.56992	1.22573
131		1	2583001..2584000	1.04311	0.951317	1.0085	0.885858	0.952983	0.988887	1.15679	1.23537	0.88767	0.972847	1.07787	1.01536	1.15475	0.943665	1.01641	0.835439	0.965692	0.858462	1.14405	0.889249	0.926414	0.969344	0.835128	1.02431	0.798754	1.14187	1.18879	1.13276	1.10148	1.07511	0.973397	1.21233	1.22317	1.12579	0.887712	0.971072	0.981112	0.939735	1.01331	0.972306	1.07515	1.00309	1.03008	1.12926	1.50734	1.10893
132		1	2586001..2587000	0.854708	0.913077	0.820516	0.815478	0.838834	1.14883	1.0711	1.27354	0.759302	1.11452	0.964626	1.01101	1.03961	0.977413	0.812032	0.844983	0.920705	0.987726	1.1926	0.81089	0.909832	0.834358	0.892136	0.856595	0.773553	1.02855	1.05704	1.07342	0.982434	0.970495	1.02813	1.07136	1.11114	1.09588	0.946333	0.981687	0.939428	1.00036	0.975159	0.961748	0.970663	1.03413	0.987874	1.13628	1.70885	0.988956
133		1	2588001..2589000	1.109	1.18251	1.1239	1.17779	1.2129	1.04555	1.08707	1.15471	1.12777	1.05558	1.08072	1.01532	1.0685	0.974908	1.17519	1.18287	1.18436	1.17543	1.22724	1.08403	1.16763	1.16623	1.32973	1.05983	1.03874	1.1977	1.17972	1.21243	1.16893	1.10668	1.05907	1.11973	1.1872	1.22806	1.12501	1.13287	1.10283	1.01352	1.07673	1.1343	1.02794	1.10749	1.07037	1.14616	1.46297	1.15931
134		1	2589001..2590000	1.17358	1.20036	1.2177	1.20745	1.20557	1.12787	1.17562	1.35106	1.18193	1.02041	1.09624	1.01878	0.980967	0.939621	1.16147	1.12229	1.1377	1.07843	1.19076	1.15989	1.12899	1.10053	1.19824	1.08201	1.0775	1.21605	1.25712	1.24943	1.17013	1.21599	1.08398	1.18234	1.21823	1.24151	0.97604	1.17862	1.14358	1.19214	1.16483	1.13172	1.11137	1.16628	1.14479	1.38256	1.17112	1.23542
135		1	2590001..2591000	1.05807	0.996848	1.10371	1.09183	1.06257	1.0827	1.11507	1.30898	1.18153	1.03269	1.1423	1.16766	0.901965	0.934714	1.03378	1.08633	1.05018	1.05895	1.20688	1.00933	1.05632	1.06452	1.13929	1.08687	1.16562	1.18087	1.14067	1.22031	1.18364	1.13893	1.06271	1.20017	1.08265	1.15577	1.0271	1.03362	1.00463	1.11216	1.11304	1.09981	1.12128	1.10298	1.03573	1.23263	1.31679	1.10548
136		1	2591001..2592000	1.08983	1.01734	1.08601	1.15923	1.17116	1.13274	1.03301	1.25981	1.10666	1.11203	1.15211	1.17539	1.0068	1.0772	1.08267	1.16528	1.09201	1.15969	1.19043	1.17138	1.13721	1.11053	1.12542	1.09987	1.10669	1.16285	1.22429	1.12873	1.20522	1.18991	1.03174	1.16826	1.18715	1.19919	1.22172	1.16231	1.06812	1.12559	1.14499	1.07085	1.11399	1.14567	1.1701	1.2578	1.29925	1.08406
137		1	2592001..2593000	1.08106	1.03821	1.13295	1.28882	1.21338	1.1229	0.997264	1.20465	1.05521	1.0183	1.13233	1.13393	0.902527	0.969333	1.18497	1.20445	1.10685	1.13881	1.31339	1.187	1.17895	1.17978	1.14573	1.07637	1.2301	1.10989	1.2065	1.16897	1.2278	1.28164	1.1684	1.29196	1.22748	1.24118	1.18453	1.16962	1.13336	1.22644	1.15286	1.1219	1.13763	1.15472	1.22589	1.26219	1.48154	1.11832
138		1	2594001..2595000	0.989454	1.07922	1.00166	1.07664	1.00939	0.998999	1.02375	1.19339	0.965748	0.987598	1.03686	1.02227	1.00155	0.991262	0.916834	0.944313	1.04097	1.01282	1.11411	0.964949	1.08929	1.07315	1.04598	1.09289	1.1246	1.07991	0.997667	1.13299	1.08584	1.03378	1.04303	1.10277	1.1293	1.19797	1.14515	1.03398	1.04871	1.03778	1.11226	1.03648	1.07729	1.09144	1.04978	1.17072	1.12753	1.05594
139		1	2595001..2596000	1.00494	0.923154	0.94884	0.904806	0.902834	1.15501	1.15148	1.2361	1.0101	1.02977	1.0706	1.04363	0.955425	0.905428	0.966328	1.07261	1.01298	0.970351	1.10956	0.995915	0.941877	1.00342	1.05622	0.98143	1.08685	1.01499	1.12548	1.08387	1.12534	1.04281	1.11551	1.0698	1.03497	1.13997	1.18647	1.0938	1.02146	1.11548	1.0846	1.09888	1.01944	1.05611	0.986138	1.17968	1.37758	1.04798
140		1	2597001..2598000	1.0414	0.942297	0.913897	0.930274	0.785711	0.975014	0.969224	1.2773	0.885083	1.0447	0.913451	1.04761	0.984941	0.91143	1.07651	0.947068	0.90675	0.872467	1.02472	0.775584	0.886674	0.914361	0.83905	0.869474	0.734391	0.983261	0.925667	0.974772	0.963365	0.953081	1.0142	0.960061	0.950381	0.973814	0.915044	0.905387	0.935036	0.892965	0.962291	0.921962	0.897678	0.957079	0.926522	1.06848	1.67407	1.01887
141		1	2598001..2599000	1.07257	1.11191	1.15888	1.10749	0.961189	1.0021	1.10291	1.23504	1.07092	1.04871	1.10096	1.12431	0.959932	1.01549	1.06059	1.01079	1.04659	1.12998	1.14263	1.08282	0.973181	1.14336	1.1544	1.01453	1.11587	1.03108	1.04438	1.03343	1.09716	1.07396	1.06619	1.07497	1.05039	1.06072	0.972719	1.02637	1.10538	1.07993	0.974418	1.05161	1.00944	1.09685	1.01141	1.1614	1.36037	1.10606
142		1	2599001..2600000	1.12814	1.16103	1.19555	1.10438	1.20961	1.07472	1.07633	1.15999	1.21387	1.00867	1.207	1.07443	1.0977	0.937125	1.23016	1.18834	1.03035	1.10548	1.21703	1.15806	1.25738	1.08734	1.14873	1.0932	1.21922	1.10614	1.08864	1.20331	1.25595	1.10194	1.20603	1.14437	1.095	1.32839	1.1572	1.23253	1.08404	1.20534	1.00865	1.14074	1.17735	1.18689	1.19665	1.269	1.3588	1.21538
143		1	2600001..2601000	1.11618	1.06957	1.05616	1.16575	1.16709	1.00741	1.07361	1.26791	1.03705	1.00886	1.13887	1.00223	1.06737	0.973628	1.24276	1.22924	1.09914	1.05769	1.19095	1.10817	1.19818	1.09457	1.22812	1.14514	1.06556	0.99181	1.14706	1.18695	1.11377	1.14995	1.15663	1.10921	1.04299	1.10877	1.10973	1.15284	1.17774	1.19073	1.12182	1.09383	1.1467	1.1686	1.11791	1.26296	1.21719	1.22705
144		1	2601001..2602000	0.931451	0.989097	0.966727	1.02485	0.950672	0.993593	1.07531	1.29054	1.05068	0.986164	1.1523	1.04444	0.954005	0.910985	1.08059	0.934533	1.13981	0.958305	1.17383	1.01662	1.02064	0.95449	0.979955	0.953153	1.06039	1.06335	1.14948	1.13406	1.16038	1.10191	1.0739	1.00677	1.1715	1.23179	1.09482	1.18901	1.05733	1.09001	1.08601	1.00227	1.17707	1.11972	1.08996	1.12635	1.30316	1.16485
145		1	2602001..2603000	1.12692	1.08402	1.08713	1.09771	1.00419	1.17279	1.11126	1.3138	1.12243	1.00497	1.12604	0.957647	1.09713	0.94861	1.18579	1.03768	1.07173	1.14229	1.15927	0.946503	1.00885	1.03355	1.09732	1.00005	1.18121	1.12835	1.07737	1.13421	1.09503	1.11103	1.19454	1.17164	1.10746	1.21397	1.15263	1.08687	1.14031	1.14349	1.15746	1.08031	1.11202	1.14468	0.999643	1.29398	1.37246	1.17099
146		1	2603001..2604000	1.10815	1.06633	1.10337	1.11941	1.15451	1.01255	1.19936	1.26444	1.2165	1.10437	1.14668	1.06613	1.07221	1.03505	1.18562	0.996051	1.20783	1.06957	1.09282	1.08902	1.09688	1.09858	0.985673	1.0417	1.12045	1.01974	0.948635	1.12913	1.22751	1.118	1.18361	1.05343	1.05182	1.20059	1.14836	1.02169	1.05113	1.10119	1.1604	1.14769	1.07077	1.14855	1.06016	1.25204	1.69428	1.13403
147		1	2604001..2605000	1.15685	1.10679	1.12146	1.27199	1.17789	1.18882	1.02913	1.23875	1.17956	1.04537	1.04104	1.03591	0.97005	0.821301	1.19507	1.07346	1.16175	1.12616	1.12598	1.10029	1.07757	1.22675	1.19756	1.09791	1.11732	0.986973	1.17436	1.09864	1.20891	1.17285	1.22783	1.17249	1.08046	1.1578	1.20947	1.11842	1.10885	1.14464	1.2517	1.13133	1.19925	1.10171	1.0808	1.21203	1.65875	1.10329
148		1	2605001..2606000	1.05292	1.06036	1.10825	1.12216	1.11318	1.1332	1.00129	1.2312	1.06678	1.02603	1.11034	1.12926	1.08051	1.01973	0.991092	1.06469	1.15764	1.07918	1.16844	1.02374	1.11359	1.19056	0.979965	1.09447	1.18096	1.09991	1.0933	1.10674	1.19688	1.11467	1.20579	1.15639	1.10527	1.16914	1.24667	1.12553	0.994768	1.02312	1.12846	1.07815	1.05619	1.06351	1.1319	1.24462	1.66005	1.26087
149		1	2608001..2609000	1.12278	1.11805	1.04977	1.02727	1.1207	1.09644	1.08207	1.1126	1.1841	1.06323	1.28959	1.13608	0.993402	0.951105	1.09215	1.06317	1.1347	1.06361	1.12338	1.11055	1.20404	1.13443	1.13149	0.963621	0.968329	1.08458	1.12825	1.17813	1.22131	1.1879	1.18871	1.11074	1.10204	1.23933	1.21556	1.16813	1.10679	1.1647	1.1419	1.15477	1.21121	1.15614	1.14508	1.23855	1.35563	1.14312
150		1	2609001..2610000	1.07283	0.930894	0.878073	0.931137	0.81125	0.988799	1.04173	1.21054	0.766394	1.1434	0.989028	1.15227	0.97714	0.846709	0.961116	0.938313	0.858451	0.957684	1.00178	0.927635	1.01526	0.925835	0.901658	0.929444	0.891813	0.918369	0.955359	0.954158	1.00268	1.06298	1.03763	0.99229	0.933326	1.02895	1.05478	0.888785	0.926818	1.05335	0.963354	1.07555	0.984814	0.969182	1.02922	1.07618	1.7728	1.02545
151		1	2614001..2615000	1.00712	0.915515	1.02218	0.915162	1.04072	1.08338	1.23001	1.22839	1.00034	1.04423	1.01831	1.02723	0.944528	1.00296	0.990571	1.10209	1.0082	1.04044	1.06527	0.95838	0.933149	1.01761	1.0131	0.965742	1.05962	1.02286	1.01959	0.972545	1.05586	1.05183	1.06656	1.06468	0.97175	1.08742	0.984879	1.03534	1.02163	1.0282	1.03324	0.996292	1.07528	1.06292	0.985859	1.06985	1.66516	1.03447
152		1	2624001..2625000	0.972088	0.83908	0.975475	0.922436	0.902303	1.01149	1.03769	1.19085	0.887823	0.984413	1.08007	1.01906	0.925958	0.917358	0.949889	0.991002	0.926093	0.854781	0.951071	1.00715	0.971722	1.02178	1.01022	0.949365	1.03834	1.11051	1.01689	0.936792	1.01439	1.02728	1.0136	0.959023	1.07141	0.962663	0.864361	0.991053	1.04158	0.951695	1.00887	0.950543	1.04784	1.03383	1.07345	0.959348	1.1895	0.976201
153		1	2625001..2626000	0.851973	0.8572	0.817358	1.01174	0.731174	1.10654	1.09694	1.34044	0.813621	1.12475	0.960913	1.06539	0.966855	1.01881	0.962846	0.985068	0.864032	0.989686	0.970891	0.922001	0.862944	0.928009	1.03087	0.897696	0.979533	1.05158	1.05023	0.944352	0.991757	1.00711	1.00629	0.934718	1.02473	1.08197	0.971466	0.879409	0.990963	0.869836	1.03071	1.04904	0.975927	0.970993	0.900562	0.939297	1.13902	0.978149
154		1	2632001..2633000	1.01317	1.02064	1.09831	1.0337	1.02801	0.935274	1.03335	1.29027	1.02631	1.18073	1.0801	1.13636	1.13945	0.988145	1.04641	1.13645	1.25926	1.07757	1.1356	1.06265	1.08381	1.17579	1.19585	1.08852	1.13762	1.13807	1.06613	1.08544	1.03324	1.11881	1.03852	1.11188	1.07768	1.06948	1.11199	1.1177	1.12314	1.04301	1.10115	1.14628	1.07481	1.07859	1.10394	1.08457	1.31476	1.15981
155		1	2633001..2634000	0.98277	1.06121	0.965619	0.925121	0.971081	1.00221	1.18498	1.24967	1.00312	0.998202	1.05138	0.986614	0.937585	0.887302	0.985395	1.03768	1.09027	1.16597	1.01933	1.08618	0.985411	1.05499	1.05767	0.962216	1.00572	1.15693	1.09955	1.02491	1.00905	1.13557	1.06114	1.06437	1.01235	1.09556	1.06423	1.05718	0.993546	1.0633	1.06591	1.10687	1.10506	0.956977	1.14342	1.08048	1.20153	1.20557
156		1	2635001..2636000	1.12988	1.17872	1.17655	1.35634	1.27387	0.982274	1.09038	1.16365	1.09707	1.00087	1.18696	0.992211	1.03368	0.931346	1.16418	1.13914	1.189	1.15945	1.1405	1.18021	1.21055	1.315	1.08512	1.2348	1.16176	1.16379	1.22269	1.06801	1.22207	1.19432	1.10641	1.25807	1.14395	1.18443	1.1791	1.15097	1.16976	1.1323	1.05136	1.11026	1.12879	1.16001	1.05148	1.09869	1.3108	1.14046
157		1	2636001..2637000	1.02737	1.02026	1.12009	1.21647	1.12512	1.08054	1.04343	1.16271	1.01988	1.07321	1.06071	0.877152	1.18806	0.932738	1.13282	0.98487	1.09408	1.08104	1.13016	1.20624	1.10231	1.21819	1.14112	1.01686	1.00457	1.11126	1.1593	1.07532	1.07468	1.05912	1.03708	1.04929	1.09833	1.17714	1.26721	1.0485	1.07953	1.20854	1.13442	1.04257	1.10677	1.07615	1.15786	1.12942	1.7536	1.15991
158		1	2637001..2638000	0.969155	0.915493	0.965786	0.981737	0.959557	0.938353	1.06338	1.03955	0.916731	0.973022	1.07936	1.00171	1.048	1.12253	1.00815	1.15176	1.06209	1.11206	1.11084	1.12944	1.0753	1.05322	1.04206	0.983605	1.01083	1.0658	1.1193	1.02269	1.08729	1.14062	1.08563	1.08561	1.117	1.18357	1.10988	1.12106	1.06437	1.07271	0.993251	1.13942	1.09563	1.0447	1.02855	1.10757	1.6803	1.15149
159		1	2660001..2661000	1.09915	1.12752	0.991402	1.07327	0.99117	0.985309	1.04584	1.06331	1.0643	0.965838	0.998154	0.97105	0.979152	0.994361	1.1626	1.02495	1.03764	1.18658	1.12706	0.996892	0.98084	1.12922	0.981702	1.14339	1.22691	1.06977	1.07356	1.08452	1.0767	1.13266	1.0838	1.09915	0.971824	1.1566	1.02441	1.06256	1.1313	1.10533	1.113	1.11609	1.12928	1.12307	1.12747	1.09546	1.73422	1.05448
160		1	2677001..2678000	1.05975	1.16599	1.01879	1.05748	0.939671	1.05065	0.980056	1.14482	1.06143	1.16453	1.03472	1.00324	1.04377	0.891968	1.17661	1.07765	1.07753	1.08299	1.08168	1.07541	1.14107	1.02511	1.09119	1.07669	1.01086	1.01779	1.02616	1.01675	1.05467	1.01557	0.924173	0.985915	1.01926	1.07197	1.03994	0.940722	1.03485	0.981856	0.940216	1.02461	1.01431	1.12608	1.05318	1.07317	2.07337	1.06302
161		1	2722001..2723000	0.959599	0.905539	0.969817	0.803239	0.88992	1.00945	1.03949	1.01121	0.850315	1.12898	1.03312	1.15002	1.00799	1.03328	0.785952	0.935154	0.904836	0.818118	0.954642	0.864864	0.90621	0.991111	0.906654	0.918387	0.934066	0.982592	0.967731	0.925336	0.880733	0.948961	0.879493	0.931011	0.936482	0.861556	0.762555	0.944974	0.932844	0.906789	0.97215	0.888481	0.962381	0.95045	0.955087	0.933933	1.22058	0.873922
162		1	2919001..2920000	0.885294	0.988356	1.02757	1.01416	0.954295	0.853006	0.860522	1.07529	0.981826	0.978643	0.983548	1.02693	0.963285	0.851124	0.993354	0.916309	1.09672	0.963181	0.966463	0.918764	0.937343	0.903014	0.969418	0.948132	1.04034	0.980037	1.0211	1.02195	0.981196	1.08709	1.08688	1.01293	0.997754	0.852886	1.02982	0.970636	0.980779	1.11569	1.01043	1.01028	1.00735	1.00043	1.05706	0.946636	1.69531	1.05789
163		1	2929001..2930000	0.968573	0.928108	0.805364	0.931305	0.95812	0.996768	0.970142	0.935537	0.919447	1.06664	0.993906	1.04109	1.05019	0.989184	1.01272	0.998882	1.08082	0.940117	1.03188	0.957686	0.986456	0.928576	0.949973	0.9527	0.960031	1.01752	0.993572	0.995173	0.938686	0.935263	0.934369	0.968813	0.963635	0.932612	0.956338	0.859397	1.05437	0.958496	0.963023	1.04065	0.982489	1.04918	0.965859	1.02431	1.60458	1.0571
164		1	3046001..3047000	0.796185	0.872242	0.919125	0.909285	0.944129	0.982274	1.1984	1.18188	0.797882	1.14965	0.882727	1.11206	0.990098	0.95463	0.954828	0.864449	0.937416	0.845914	0.853635	0.951516	0.850179	1.00614	0.97012	0.856369	0.921773	0.957402	0.867028	0.907384	0.978003	0.844251	0.928113	0.852039	0.914387	0.915639	0.775484	0.758685	0.920401	0.910725	0.996421	0.935066	0.925213	0.93185	0.872169	1.04374	1.46036	0.933115
165		1	3089001..3090000	0.987994	0.730583	0.916702	0.934446	0.830683	1.03937	1.05418	1.0387	0.847631	1.07549	1.01341	0.879711	1.00022	0.973498	0.834309	0.893543	0.85596	0.922861	0.974312	0.94028	0.931775	0.976296	0.938109	0.954603	0.849446	1.00395	1.00855	0.950644	1.05369	1.0113	0.939436	1.00003	0.99116	1.01804	0.91577	0.966403	1.01875	0.970817	0.987634	0.996947	0.974961	1.10336	1.01849	1.01985	0.984603	1.00753
166		1	3093001..3094000	0.76123	0.73984	0.775316	0.691188	0.769471	0.843077	0.790908	0.883466	0.703822	0.830467	0.773885	0.807869	0.793023	0.82823	0.947035	0.78355	0.755961	0.761905	0.852013	0.797194	0.778625	0.876046	0.754216	0.85616	0.752128	0.841793	0.828049	0.832426	0.821767	0.765868	0.779182	0.773158	0.810188	0.787985	0.819483	0.778538	0.833687	0.839064	0.835798	0.82095	0.791158	0.829215	0.812242	0.746623	0.622879	0.821933
167		1	3111001..3112000	0.850586	1.05925	0.993324	0.975246	0.940022	1.12083	1.10199	1.21105	0.892296	1.14095	0.945763	1.05824	0.92015	1.09633	0.971302	0.939696	0.82185	0.981022	1.00497	0.998668	0.911036	0.87038	1.03895	0.925402	0.967828	1.08336	1.00928	1.07113	1.02745	0.985705	0.973734	1.09448	1.04327	1.08512	0.959152	0.900243	1.09237	1.07477	1.00904	1.0355	1.03277	0.996407	1.05148	1.074	1.35635	1.07014
168		1	3131001..3132000	0.961753	0.926873	0.899011	0.892845	0.917317	1.06582	1.04615	1.04428	0.961807	1.04066	1.01072	1.0185	0.94364	0.883434	0.937738	0.885315	1.03268	0.993403	0.909727	0.786231	0.926985	0.90112	0.872554	0.94999	0.874093	0.977045	0.881622	0.924856	0.959553	0.899284	0.989494	0.912571	0.944299	0.964513	0.908228	0.913436	1.01725	0.902271	1.00887	0.994146	0.960831	0.99345	0.925086	0.966389	0.995047	0.926161
169		1	3164001..3165000	1.15295	1.09732	1.08489	1.1018	1.12949	0.979842	0.984179	1.11885	0.937871	1.18249	0.994271	1.08126	1.15523	0.944713	0.973173	1.00703	1.11216	1.06584	0.986422	1.13305	1.10067	1.08839	0.984794	0.932	0.98287	1.01862	1.09401	0.945018	1.01635	0.880857	1.06606	1.04873	1.06486	0.984981	1.0557	0.918223	1.1029	1.07971	1.10729	0.891282	1.06731	1.02783	1.03898	0.948638	1.67624	1.09446
170		1	3192001..3193000	1.00313	1.02697	0.89851	0.993202	1.07839	0.962461	1.09279	1.05592	1.08028	0.991657	1.0892	1.03872	1.03829	0.944055	0.923158	1.05935	0.988844	1.03391	1.0718	1.08716	0.939264	0.97938	1.04869	0.982046	0.989543	1.00598	1.0563	1.10693	1.09055	1.10181	0.98614	1.05145	1.07124	1.01599	1.10065	1.08191	1.04617	1.07107	1.05451	1.12188	1.07771	1.06485	1.02216	1.03579	1.65258	1.09069
171		1	3193001..3194000	0.940388	0.97073	0.874042	0.968348	0.910009	1.1848	1.11298	1.10047	0.915716	1.13085	0.888572	1.0047	1.0385	1.02461	0.893183	0.928825	0.919946	0.915416	0.868588	0.922243	0.797954	0.88947	0.989165	1.01237	0.892928	0.821044	0.779211	0.832612	0.813072	0.792104	0.749517	0.780817	0.781887	0.822639	0.732651	0.694696	0.830557	0.834937	0.890852	0.847737	0.86512	0.786614	0.736463	0.775633	1.30987	0.920574
172		1	3201001..3202000	1.05656	1.10157	1.08575	0.971995	1.0299	1.19134	1.02123	1.10586	0.945197	1.04347	1.15418	1.08698	1.10112	0.923137	1.01358	0.928854	0.905757	1.14438	0.996769	1.03616	1.14985	0.976344	1.03072	1.0074	0.977487	1.01349	1.10251	1.03257	0.931259	1.06843	0.911608	1.07579	1.10433	1.02681	1.09297	1.10284	1.11476	1.04667	1.15259	1.13918	1.09505	1.09376	1.16323	0.960475	1.70778	1.11679
173		1	3306001..3307000	0.957173	1.00754	1.02998	1.00719	0.983651	1.07868	1.07273	1.15636	0.949524	1.00363	0.912932	1.10195	1.07719	0.899194	0.973256	0.946965	1.00243	1.00608	1.0221	1.04969	1.07543	1.06657	1.04393	0.990194	0.945613	1.04931	1.13346	1.12236	0.955712	1.03542	0.913454	0.991816	1.07418	1.1284	1.08831	1.04448	1.02241	1.02877	1.08116	1.02969	0.996488	1.07693	0.959031	1.01845	1.33496	1.07871
174		1	3316001..3317000	1.00718	1.00108	0.899334	1.03681	1.03348	1.07583	1.09077	1.09293	1.16043	0.949303	1.1495	1.13361	1.05497	0.910697	1.48258	1.45546	1.36705	1.43061	1.3107	1.38033	1.48679	1.41552	1.38157	1.48103	1.47079	1.31097	1.3029	1.3342	1.31485	1.26936	1.16727	1.30913	1.27788	1.4164	1.17312	1.30087	1.31756	1.2495	1.19278	1.3386	1.35918	1.2693	1.34037	1.30328	1.2146	1.30471
175		1	3360001..3361000	0.9215	0.896957	1.00202	0.893826	0.925117	1.06153	1.11557	1.03473	0.964007	1.10904	0.909644	1.09687	1.13241	0.934927	0.918978	0.897906	0.831431	1.01797	0.892648	0.888808	0.960064	0.770417	0.915874	0.866193	0.976715	0.927151	0.863457	0.966511	0.914076	0.900565	0.906443	0.973867	0.841778	0.888913	0.857391	0.96678	0.836319	0.820042	0.927125	0.891121	0.964645	0.929323	0.865438	0.864077	1.33465	0.832472
176		1	3450001..3451000	1.01078	1.0412	0.99298	0.916777	0.861243	1.09758	1.13943	1.13713	0.837017	1.06282	0.931549	1.02454	0.879895	1.01444	0.94257	0.939244	0.891508	0.92298	0.979728	0.931314	0.968379	0.836244	0.931787	0.879071	0.948958	1.01557	0.854802	0.944698	0.945141	1.03637	0.956936	0.887628	0.952339	1.00351	1.01698	0.933497	0.946618	0.992404	0.965756	1.08397	0.956956	0.925773	1.03469	0.952354	1.52322	0.927278
177		1	3508001..3509000	0.908527	0.916448	1.06894	0.973878	0.922221	0.999121	1.0691	1.02991	0.866047	1.09998	1.03015	1.09749	1.04095	0.972255	1.00163	0.993465	0.958289	0.865548	1.02182	0.951989	0.889932	0.88724	1.00976	1.01465	1.03641	0.869478	0.943967	0.999983	1.00455	0.9103	1.03638	0.990687	0.93906	0.969236	0.98633	0.94776	0.944094	0.961081	0.984071	0.876441	0.919135	0.940025	0.966813	0.95688	1.24665	0.946872
178		1	3519001..3520000	1.05211	0.896238	0.833696	0.898335	0.945558	0.950451	1.03037	1.03065	0.885929	1.08188	1.07366	0.979022	1.12091	1.04591	0.955574	0.792041	0.943584	0.807351	1.05266	1.00763	1.02171	0.903877	0.976794	0.921197	0.826282	0.955323	0.994591	1.02515	1.02698	0.989355	0.993984	1.06348	1.01253	1.04869	0.971444	0.987505	0.950208	1.02248	1.012	1.03004	0.950626	1.04734	1.02255	0.981606	1.14066	0.913548
179		1	3521001..3522000	0.970714	0.927906	0.946152	0.922198	0.852131	0.980586	1.13457	0.983645	0.881126	1.04015	0.944294	1.034	0.985937	0.878926	0.902527	0.959707	0.854562	0.861007	1.08002	0.978593	0.941343	0.870764	1.01301	0.948059	0.887291	1.03695	0.870463	0.948106	1.00243	1.0602	0.928202	0.950691	0.933698	0.912288	0.956998	0.956402	0.982442	0.953438	1.00465	1.00053	0.949589	1.08889	1.02722	0.894959	1.08169	0.873653
180		1	3523001..3524000	0.902846	0.91374	0.928647	0.830065	1.02299	1.0703	0.911677	0.8888	0.959534	0.979808	0.989827	0.931932	1.13304	0.882812	0.930525	0.874764	0.956192	0.858008	0.964244	0.849202	0.884437	0.960035	0.902078	0.89185	0.95147	0.952879	0.985722	0.902299	0.966155	1.04206	0.997001	0.979996	0.999035	0.969892	0.851871	0.925825	0.966829	0.985452	1.00108	0.95229	0.97017	0.994913	1.07059	0.936159	1.16665	0.948445
181		1	3525001..3526000	0.943396	0.833519	0.868344	0.93739	0.976203	0.931915	0.88433	1.01063	0.883181	1.07607	0.914827	0.965629	0.986193	0.906449	0.817586	0.792239	0.821435	0.751066	0.848386	0.872694	0.893372	0.907648	0.793984	0.863963	0.890733	0.798318	0.83491	0.867575	0.921307	0.839937	0.848434	0.914993	0.833333	0.90569	0.801122	0.898469	0.858907	0.865318	0.873786	0.826021	0.9247	0.938357	0.91843	0.833801	1.03897	0.826098
182		1	3529001..3530000	0.937467	0.872557	0.883722	1.04595	0.875937	1.01055	0.977519	0.947882	0.875508	1.03511	0.952833	0.986712	1.05809	0.977635	0.92452	0.803909	0.910021	0.788661	0.953616	0.905037	0.882504	0.877028	0.928128	0.849607	0.842342	0.907852	0.915614	0.927181	0.977414	0.927399	0.917482	0.978074	0.909007	0.970506	0.972829	0.849208	0.972092	0.936409	0.999672	0.923576	0.919759	0.915174	0.856499	0.955977	1.23545	0.938675
183		1	3572001..3573000	0.967459	1.06008	0.98131	0.866801	1.0096	1.05336	1.06518	0.981179	0.964764	1.00428	0.892073	1.05711	1.00343	0.908508	0.914477	0.960271	0.906253	0.933162	1.0121	0.906088	1.06732	0.952484	0.868817	0.734498	0.864794	0.889324	0.852502	0.917376	1.01392	0.976809	0.908759	0.979258	0.910676	0.877072	0.993234	0.875504	0.94475	0.947858	0.99702	0.902297	0.920312	0.921865	1.00452	1.07706	0.981702	1.03317
184		1	3577001..3578000	0.810049	0.818376	0.817613	0.69204	0.85605	1.12004	0.914189	1.04423	0.817957	1.15947	0.922534	1.08571	1.00351	1.0232	0.729519	0.798323	0.895852	0.809789	0.862435	0.77654	0.92188	0.789515	0.952051	0.730374	0.738096	0.921877	0.874228	0.841921	0.997406	0.874856	0.854628	0.93521	0.970907	0.828547	0.943739	0.816767	0.89477	0.873863	0.997975	0.887	0.900778	0.903358	0.847945	1.00973	1.3905	0.919018
185		1	3596001..3597000	0.78991	0.814467	0.851996	0.858061	0.779746	0.975232	1.11422	1.06213	0.806803	1.05288	0.860533	1.10234	1.04329	0.92373	0.86239	0.722314	0.838217	0.810936	0.852423	0.736462	0.857327	0.793518	0.792872	0.953787	0.960189	0.875603	0.819568	0.863351	0.835315	0.877676	0.947237	0.889285	0.750652	0.854992	0.859985	0.833964	0.831721	0.855842	0.863053	0.903247	0.85735	0.822268	0.8686	0.955148	1.10997	0.948874
186		1	3634001..3635000	1.01124	0.931613	0.895186	0.904013	0.890232	0.990628	1.0048	0.99418	0.740242	1.05289	0.880076	0.954065	1.0278	0.958934	0.871107	0.952701	0.789392	0.94602	0.91024	0.802019	0.984049	0.959939	0.968189	0.867996	0.743611	0.90408	0.86009	0.802237	0.839981	0.834636	0.961763	0.802272	0.917675	0.903542	0.8502	0.911523	0.885936	0.94292	0.873027	0.845743	0.855307	0.832806	0.896896	0.950929	1.14459	0.93745
187		1	3677001..3678000	0.990754	1.06078	0.943201	1.01604	0.978686	0.861386	1.04398	1.00639	0.760511	1.06753	1.09728	1.05415	0.993856	0.838564	1.06696	0.946307	0.863525	1.08463	0.916486	0.91128	0.952296	0.97163	0.893863	0.999266	0.886009	0.977217	0.916167	1.08573	1.02963	1.08226	1.05942	0.976991	0.972535	1.03328	0.964716	0.899976	0.923218	0.975295	0.988911	1.04057	0.932007	0.986667	1.07183	1.02868	1.14971	1.07088
188		1	3745001..3746000	1.0596	1.0106	1.1083	1.00383	1.05386	1.06797	0.933958	0.997665	1.10464	1.02925	1.17432	0.959964	1.02201	0.919204	1.13045	1.14877	1.04978	1.05714	1.1195	1.10443	1.13384	0.897029	1.06308	1.00561	1.01498	1.12896	1.02466	1.13493	1.1074	1.11477	1.05813	1.15683	1.12852	1.04381	1.0517	1.06102	1.1318	1.01161	1.05132	1.1127	1.1678	1.07523	1.18647	0.973755	1.32852	1.11942
189		1	3807001..3808000	0.798129	0.887374	0.846671	0.768485	0.746321	0.793445	0.857768	0.893478	0.732304	0.913176	0.79335	0.895937	0.770361	0.787748	0.784993	0.766257	0.720028	0.800468	0.849551	0.802649	0.784715	0.758279	0.907249	0.833231	0.734031	0.856873	0.854579	0.85217	0.877874	0.825593	0.783921	0.836522	0.791431	0.81073	0.773043	0.778122	0.760562	0.827554	0.779745	0.767425	0.79452	0.833062	0.74596	0.798226	1.79574	0.822174
190		1	3825001..3826000	0.7833	0.93905	0.857007	0.887255	0.820416	1.02072	1.04889	0.991347	0.850106	1.03844	0.763604	0.900444	1.03094	0.93501	0.853957	0.815014	0.79247	0.681038	0.848684	0.766155	0.768924	0.805832	0.734859	0.865459	0.800642	0.892884	0.91475	0.829169	0.928076	0.912106	0.771018	0.845537	0.888415	0.837942	0.85462	0.734362	0.863916	0.872831	0.939922	0.89829	0.88391	0.869187	0.802403	0.825829	1.52447	0.902365
191		1	3831001..3832000	1.15627	1.10326	1.23913	1.13202	1.1325	1.01393	0.96178	0.992509	1.15906	0.981262	1.15208	0.952518	1.11422	1.20318	1.10394	1.12944	1.12942	1.14372	1.07474	1.19143	1.09932	1.1572	1.26356	1.2351	1.28443	1.15014	1.24655	1.14641	1.08006	1.1931	1.06513	1.1153	1.1495	1.16101	1.00078	1.01578	1.13477	1.18231	1.16211	1.15463	1.14587	1.16927	1.20147	1.06602	1.58936	1.05897
192		1	3832001..3833000	0.959611	1.02546	1.06069	1.01613	1.03286	1.09962	1.04539	0.978316	1.15071	1.00166	1.1719	1.05522	1.13448	1.08354	1.01251	1.03321	1.0234	0.945674	0.971842	1.07466	0.956028	0.979237	1.04959	1.05627	1.09428	1.15969	1.03161	1.09276	1.06231	1.10998	1.07234	1.03688	1.06433	1.08965	0.935405	1.13771	1.0798	1.14956	1.10661	1.04607	1.15306	1.23439	1.16323	1.09897	1.4791	1.04973
193		1	3847001..3848000	1.14297	1.01824	0.925823	0.976782	1.02898	0.991082	1.04024	0.966756	1.02108	0.974813	1.10808	0.972549	0.880467	0.811598	1.07035	1.0875	1.10203	1.00766	1.14468	1.09667	0.953426	1.05806	1.12164	1.02388	1.05259	1.13995	1.12538	1.03251	1.04772	1.05481	0.961825	1.04683	1.06588	1.02305	0.986088	1.02472	1.0449	0.983369	1.1108	1.0878	1.07004	1.09507	1.00751	1.01347	1.6651	0.962676
194	clade II unique CNV	2	1..1000	1.94975	1.99952	1.9779	2.03053	2.11959	0.828907	0.871596	0.891392	0.88983	0.834668	1.06969	0.861997	1.06859	0.903953	2.37454	3.04407	3.13981	3.15266	3.15204	3.347	3.10691	3.18377	3.11384	2.37284	2.34787	3.15934	3.17852	3.07405	3.08905	3.16213	2.58296	3.13627	3.6011	3.32458	3.27122	3.0382	2.92106	2.89549	2.86951	2.85325	2.73296	2.68938	2.93471	2.94206	4.10025	2.73518
195	clade II unique CNV	2	1001..2000	2.57932	2.57767	2.61921	2.61677	2.88923	1.1559	1.00413	1.12528	1.04035	1.04731	1.00947	0.935805	1.00698	0.964862	2.38006	3.43395	3.26725	3.65722	3.67697	3.5841	3.51732	3.19542	3.61212	2.09109	2.16424	3.55921	3.89816	3.70354	3.51104	3.76264	3.18644	3.71758	3.90723	3.98375	3.44674	3.51673	3.20697	3.40318	3.36705	3.35275	3.33568	3.27994	3.47638	3.55397	4.26177	3.34042
196	clade II unique CNV	2	2001..3000	1.51486	1.73608	1.47862	1.64903	1.44564	1.0825	0.91867	1.09011	1.22911	0.948569	1.13161	0.994586	1.02571	0.877098	1.67036	2.55909	2.30674	2.17943	2.1518	2.35694	2.38804	2.22665	2.40277	1.51934	1.60155	2.16309	2.18845	2.08322	2.00688	2.37047	1.91282	2.22868	2.42481	2.28719	1.99018	2.18896	2.03265	2.11349	2.08172	2.03464	2.11262	1.91856	2.28238	2.30835	4.40415	1.99248
197	clade II unique CNV	2	3001..4000	2.10459	1.99948	2.0595	2.2405	2.1741	0.973045	0.853312	1.04716	1.09696	0.93165	1.09817	1.08877	0.969054	0.958183	1.62166	1.81327	1.66812	1.78168	1.86574	1.88985	1.68556	1.81841	1.86322	1.65463	1.62278	1.90372	1.93362	1.79841	1.82287	2.06755	1.64657	1.90811	1.99432	2.09397	1.84616	1.8392	1.79865	1.93614	1.8028	1.74887	1.7114	1.70364	1.82973	2.03124	3.00595	1.68647
198		2	4001..5000	1.01778	1.16418	1.06956	1.12102	1.21424	1.03701	0.998165	1.30569	1.02315	1.00859	1.13145	0.996708	1.04927	0.923035	0.925835	1.35606	1.42838	1.51314	1.54488	1.4566	1.3303	1.46677	1.41612	1.35836	1.34279	1.54717	1.648	1.56088	1.59255	1.59697	1.34977	1.59648	1.58897	1.6896	1.45332	1.51304	1.51201	1.45973	1.41371	1.5528	1.45876	1.51485	1.51301	1.65387	2.80702	1.46092
199		2	5001..6000	0.886891	0.820499	0.899334	0.764561	1.00561	0.965269	1.15914	1.36927	0.873397	1.143	1.06857	1.04333	1.04262	0.95322	0.896191	1.31242	1.21986	1.29873	1.40112	1.30981	1.26047	1.19437	1.32753	1.04393	1.32349	1.31479	1.37679	1.31069	1.37956	1.44361	1.17205	1.35213	1.3952	1.45331	1.32231	1.27085	1.25764	1.24699	1.26361	1.30969	1.30074	1.33554	1.33122	1.41198	2.25318	1.35118
200		2	6001..7000	1.04575	1.02726	0.893754	1.02849	1.08171	0.994643	0.946376	1.37561	0.923823	1.11014	1.02069	0.966456	1.08419	1.11647	1.11059	1.1484	1.13829	1.06406	1.14431	1.10046	1.09908	1.03892	1.03408	1.20084	1.08274	1.14222	1.17509	1.1479	1.20364	1.32227	1.08703	1.16754	1.13696	1.25887	1.23475	1.08338	1.13195	1.02684	1.12429	1.12995	1.15248	1.15762	1.11862	1.35752	1.46713	1.10857
201		2	7001..8000	1.12246	1.16976	1.10167	1.17251	1.09953	1.00761	1.07589	1.33764	1.08303	1.10851	1.09512	1.09566	1.04752	0.893749	0.98536	1.09763	1.01763	1.02292	1.10216	1.15762	0.972573	1.07175	1.18352	1.18198	1.25727	1.03261	1.14113	1.09112	1.22476	1.22319	1.18729	1.15788	1.14594	1.28017	1.10238	1.10281	1.09274	1.10474	1.0876	1.14011	1.07298	1.1226	1.1186	1.38652	1.42197	1.18691
202		2	8001..9000	1.05979	1.21623	1.22555	1.24936	1.1027	1.13999	1.05674	1.38358	1.14348	1.04588	1.23604	0.946366	1.11724	1.06596	1.26908	1.36757	1.03871	1.15557	1.12254	1.16832	1.03783	1.1209	1.25988	1.04522	1.24963	1.21796	1.28277	1.18211	1.19523	1.24513	1.2101	1.15402	1.25561	1.25141	1.14071	1.229	1.16195	1.11363	1.17603	1.18459	1.18914	1.17078	1.13458	1.41406	1.50107	1.25181
203		2	9001..10000	0.99771	1.11466	1.00189	1.20628	1.02217	1.05881	0.87304	1.45866	1.22737	0.987248	1.22907	1.00441	1.03535	0.829362	1.22467	1.0598	1.09627	1.02466	1.0761	1.01155	1.0457	0.995282	1.0807	1.04221	1.07683	1.12585	1.2473	1.09056	1.16676	1.24911	1.08482	1.10921	1.17632	1.24401	1.18658	1.16232	1.12097	1.16768	1.21144	1.02349	1.19505	1.17844	1.26318	1.41309	2.0326	1.26987
204		2	10001..11000	0.990804	1.07163	0.992421	1.1536	1.164	0.962802	0.98185	1.42353	1.08829	1.0764	1.21857	1.04545	1.08095	1.02443	1.03893	1.07618	1.04568	1.03235	1.0696	1.12904	1.10726	1.00576	1.13217	0.960857	1.09446	0.990624	1.13812	1.11046	1.33471	1.22843	1.169	1.05008	1.09763	1.23065	1.19425	1.13309	1.13444	1.05031	1.11297	0.997346	1.12429	1.15532	1.15329	1.20891	1.67902	1.13806
205		2	11001..12000	0.928357	1.02952	0.975691	0.995283	0.996503	1.03735	0.969149	1.43565	1.02326	1.08945	1.12455	1.2709	1.02894	0.967079	0.90094	0.955823	0.937537	1.01195	1.00857	1.02613	1.09887	0.934849	1.01501	0.977333	0.957836	0.983515	1.04677	1.05853	1.02712	1.13993	1.07619	1.06365	1.06004	1.17932	1.04464	1.07878	1.04231	1.02354	0.984196	0.989275	1.09376	1.03714	1.01148	1.25324	1.50494	1.12561
206		2	12001..13000	0.724913	0.720181	0.686171	0.724267	0.712225	0.755648	0.795881	1.04618	0.743224	0.764266	0.792186	0.829438	0.717178	0.752804	1.00593	0.862812	0.704523	0.895316	0.861848	0.881019	0.980949	0.759414	0.829986	0.817352	0.839839	0.84804	0.88302	0.88023	0.938175	0.929344	0.819852	0.814383	0.794314	0.966584	0.752748	0.860765	0.759505	0.845755	0.746213	0.777604	0.822257	0.768833	0.815586	0.9394	1.65999	0.815148
207		2	13001..14000	0.958794	1.00899	1.04694	1.09135	1.08142	1.02817	0.992365	1.4131	0.89257	1.07925	1.1658	1.09678	1.05194	1.01951	1.1109	1.15488	1.13878	1.10744	1.01801	1.07508	1.12398	1.1471	1.04515	1.04948	0.952471	1.10102	1.1648	1.06364	1.17534	1.14925	1.17125	1.13891	1.06349	1.26123	1.16991	1.10555	1.09141	1.0886	1.03834	1.03612	1.10109	1.02183	1.0017	1.27871	1.90761	1.02858
208		2	14001..15000	1.07705	1.09729	0.900619	0.928263	1.01915	1.09223	1.01344	1.41379	0.96009	1.02463	1.13543	1.03364	1.06452	1.14338	1.07559	0.980865	0.973024	0.988192	1.16543	0.996482	1.04608	0.972157	1.20496	0.998151	0.97855	1.04565	1.08478	1.08802	1.13914	1.17295	1.06264	1.18901	1.05915	1.1139	1.10245	1.09103	1.0996	1.09178	1.14643	1.05301	1.05701	1.03432	1.05857	1.26508	1.36758	1.07472
209		2	15001..16000	1.13155	1.00494	0.985056	0.997206	1.13666	1.04232	1.14869	1.42452	1.04069	1.115	1.12156	1.13791	0.993165	1.04536	1.05927	1.10435	1.04538	1.00584	1.06131	1.07479	1.05543	0.919922	1.04286	1.07491	1.00991	1.01117	1.11746	1.07435	1.10606	1.10587	1.17046	1.08955	1.15215	1.1551	1.09552	1.0667	1.01962	1.15385	1.0535	0.980349	1.03775	1.08313	1.07941	1.11406	1.62272	1.13403
210		2	16001..17000	0.975863	0.891767	0.913966	0.903022	0.939874	1.09746	1.1067	1.49813	0.988765	0.999831	1.16037	1.05037	0.954478	0.995223	0.998092	0.960826	0.9346	0.915129	1.11203	0.890942	0.969291	1.02735	0.972647	1.01383	0.923231	1.02103	1.12307	1.0586	1.10103	1.0201	1.12041	1.09345	1.07344	1.12528	1.19641	1.07588	1.11402	1.00968	1.06625	1.07755	1.05841	1.09234	1.00607	1.27736	1.84113	1.15622
211		2	17001..18000	0.910867	0.957968	1.02989	1.04717	0.95221	1.03659	1.10579	1.56494	0.918464	1.14491	1.04222	1.13308	1.01171	0.99399	1.00012	0.865963	0.844587	0.990224	1.01819	0.904585	1.01952	0.847799	0.947114	0.910122	0.935067	1.02484	1.00615	1.02405	1.04485	1.05867	1.05955	1.01922	1.03845	1.09004	1.00273	0.959594	1.01514	0.980674	1.06677	0.989075	0.959553	0.944056	0.941689	1.1427	2.13811	1.10843
212		2	18001..19000	0.932862	0.968494	1	0.907581	0.907214	1.00517	1.12274	1.47803	0.870963	1.10204	1.08047	1.06645	0.961224	0.998479	0.996114	0.982867	0.95122	0.915452	1.02361	0.888692	0.937465	0.963151	0.951612	0.864154	0.935936	1.0782	1.03106	1.08444	1.08367	1.13318	1.13102	1.03414	1.00226	1.0443	1.12519	1.07608	1.04127	1.05371	1.01033	1.03706	1.00845	1.00253	0.910059	1.12058	2.2086	1.1722
213		2	19001..20000	0.927639	0.938837	0.85638	0.912783	0.921416	1.00955	1.09528	1.46777	0.875162	1.06856	0.910953	1.02895	0.932171	0.944908	1.07043	0.8887	0.952212	0.952868	1.00954	0.879148	0.921904	0.919427	1.04328	0.939486	0.97401	0.957077	0.95797	0.961701	0.974899	0.93447	1.10132	1.03035	0.946497	1.01814	0.999699	1.07491	0.878404	0.939975	0.919258	0.989322	0.928585	1.02285	0.948055	1.12167	1.66148	0.991978
214		2	20001..21000	0.915385	1.02141	1.09688	1.0842	0.950125	1.1269	0.909541	1.52692	1.05663	1.08415	1.06065	1.08156	1.10011	1.01274	1.07197	1.01861	0.984175	1.10558	0.990262	1.1405	0.915364	1.015	1.00877	1.01624	0.976311	0.956976	1.03182	0.989512	1.01009	1.00135	1.13448	0.991124	1.01716	1.05624	0.95913	1.06442	0.974264	0.941828	1.03829	0.999701	1.03391	0.996795	0.984991	1.06411	1.57984	1.05905
215		2	21001..22000	1.01088	1.08472	0.956803	0.985701	1.00113	1.10216	1.00252	1.31557	1.01958	1.08409	1.04681	1.13222	1.04261	1.00131	0.986592	0.950406	0.958765	0.971402	0.981061	0.995084	1.01236	0.918955	1.03391	0.952963	1.03339	0.943539	1.04301	0.990603	0.922741	1.01627	1.1121	1.00392	0.988673	1.08823	1.02692	0.973926	1.00596	1.0574	1.0145	1.00318	0.972817	1.01639	0.938023	1.09723	1.79901	1.0808
216		2	22001..23000	1.21539	1.04065	0.971739	1.06806	0.988414	0.981618	0.946142	1.38118	0.928651	1.04209	1.11082	1.04596	1.01622	0.796681	0.996599	0.895998	0.859312	1.06776	1.09094	0.914265	1.00961	0.905891	0.917259	0.959533	0.924846	1.03336	1.10908	0.974453	0.9849	1.08008	1.12688	0.991078	0.990548	1.08281	1.15173	1.11381	1.02448	1.02399	1.08166	1.04459	0.99057	1.08661	1.02662	1.12868	1.54927	1.06405
217		2	23001..24000	1.09064	0.961911	0.987479	1.0329	1.03877	1.0454	1.13729	1.41001	0.996389	1.00516	1.11199	0.941646	1.18679	0.987403	1.13459	0.87688	1.00238	1.03412	1.11188	0.943738	0.985897	0.869637	1.03972	1.0171	0.950715	1.19512	1.13579	1.0156	1.02298	1.19342	1.12777	1.05676	1.01085	1.18169	1.08244	1.12206	1.05515	1.04817	1.03453	1.09114	1.06033	1.0673	0.979954	1.14906	1.77371	1.069
218		2	24001..25000	1.07504	1.14099	1.0693	1.08994	1.11594	1.05233	1.11819	1.4466	1.16023	1.00467	1.2349	1.0676	1.01101	1.06677	1.19814	0.930518	1.01931	1.06693	1.05512	1.04184	1.12129	1.04946	1.11282	1.0838	1.066	1.07905	1.14358	1.03997	1.00687	1.11558	1.10864	1.10552	1.04739	1.17546	1.09599	1.15101	1.09637	1.12484	1.09046	1.15223	1.07113	1.07369	1.07984	1.22059	1.61851	1.19315
219		2	25001..26000	0.919148	0.881769	0.979584	0.965445	1.01124	1.02955	1.09335	1.32205	0.911428	0.964135	1.21161	1.03821	0.942358	0.965233	1.05327	1.04593	1.07861	0.93848	1.03218	0.952168	1.01098	0.938333	0.927386	1.02258	0.912992	1.17371	1.17716	1.03043	1.10348	1.09247	1.03855	1.0463	1.02558	1.10295	0.992861	1.17312	0.953534	1.1009	1.05456	1.10511	1.02659	1.02812	1.07432	1.19462	1.53465	1.07915
220		2	26001..27000	0.91843	0.950924	0.95645	0.972114	0.975836	1.09073	0.902623	1.30146	0.890386	1.00821	1.04609	1.00898	1.04368	0.976411	0.839236	0.91093	0.984924	1.04554	0.873566	1.08953	1.14362	0.926442	1.03979	0.990493	0.914028	0.943082	1.02242	1.04674	1.07776	1.06537	1.02431	1.04086	0.958049	1.04995	1.08031	1.05786	0.978676	1.01757	1.06217	1.02502	0.962018	0.985194	1.00901	1.04704	1.34085	1.00841
221		2	29001..30000	0.83124	0.82998	0.770383	0.787542	0.870221	0.892325	0.796649	1.06765	0.766733	0.830487	0.847287	0.885542	0.901334	0.807191	0.723905	0.885889	0.844242	0.739785	0.855397	0.786578	0.783245	0.887968	0.823186	0.749569	0.840744	0.928429	1.01875	0.956643	0.895056	1.02814	0.927457	0.900031	0.93226	0.934812	0.957855	1.05547	0.95826	0.929377	0.949834	0.868608	0.950505	0.851917	0.935708	0.958398	1.48407	0.974136
222		2	30001..31000	1.08933	1.02405	1.13915	1.11972	0.957621	1.05014	1.18444	1.40171	1.03072	1.08846	1.13585	1.01298	0.97718	1.08488	1.01599	1.01742	1.07364	1.11147	1.11686	1.00068	1.02411	1.14789	0.990297	0.967028	0.960391	1.05876	1.12214	1.01773	1.06002	1.13985	1.06845	1.07274	1.03685	1.09684	1.1623	1.09335	1.09479	1.1236	1.05913	1.03179	0.978654	0.989685	1.0863	1.10193	1.65856	1.03938
223		2	31001..32000	0.997785	0.908146	0.99705	0.962977	0.950617	1.01913	1.05925	1.28333	0.913757	1.01344	1.05959	1.05616	0.983442	1.06656	1.04401	1.13303	0.973784	0.96287	1.15761	1.07941	1.02904	1.14518	1.11259	0.975738	1.08564	1.09982	1.22454	1.05943	1.09183	1.13145	1.15479	1.11291	1.07427	1.20792	1.14513	1.16368	1.0971	1.05543	1.06361	1.07374	1.09645	1.10926	1.08564	1.06886	1.05661	1.043
224		2	32001..33000	1.13476	0.981143	1.05173	1.20606	1.12036	1.04504	1.04648	1.31825	1.02169	0.911002	1.17319	1.12088	0.923029	0.89874	1.18162	1.11636	1.03608	1.00044	1.15611	1.01701	1.28583	1.0713	1.03229	1.07956	1.05761	1.13145	1.23782	1.10276	1.17208	1.07659	1.16385	1.13233	1.17545	1.15885	1.01995	1.17276	1.13127	1.09669	1.13421	1.01791	1.16318	1.14801	1.0651	1.16127	1.77366	1.1076
225		2	33001..34000	1.04144	1.08751	0.914123	1.12188	1.05163	1.13179	0.95276	1.29055	1.04781	0.988123	1.09644	0.994712	1.1032	0.926318	0.988664	1.13126	1.03998	1.05209	1.06292	1.09007	1.08845	0.992805	1.16272	1.04629	1.10507	1.11174	1.12507	1.03015	1.10938	1.15542	1.03302	1.07633	1.00451	1.14142	1.13741	1.12523	1.03816	1.02067	1.04332	1.03857	1.09828	1.09096	1.06567	1.1092	1.36	1.01437
226		2	34001..35000	1.03682	1.05921	1.05066	1.11977	1.11028	0.987793	0.896614	1.02081	1.02389	0.768662	1.01478	0.96924	1.0127	0.834251	1.08886	1.16264	0.970644	0.938767	1.00921	1.17094	1.18463	0.992054	1.09561	1.06942	1.04724	1.10766	1.12914	1.04022	1.1271	1.07757	0.92593	1.10304	1.0683	1.09604	1.03802	1.23513	0.929919	1.05208	1.02531	1.10585	0.963015	1.04108	1.04377	1.07245	1.73817	0.979526
227		2	35001..36000	1.02904	1.05532	0.96149	0.985403	1.03339	1.11215	1.03886	1.3562	1.03798	0.960647	1.05977	1.15177	0.874471	0.992839	1.08371	1.0427	1.03671	1.08823	1.06056	0.942813	1.19678	1.029	1.01924	0.99826	1.06657	1.10514	1.12564	0.988367	1.12043	1.16692	1.01229	1.0435	1.12503	1.19989	1.09812	1.11636	1.05921	1.1217	1.00481	1.11373	1.0694	1.08403	1.05298	1.08083	1.36004	1.05942
228		2	36001..37000	0.876357	1.02399	0.966227	0.944753	0.907394	1.13526	1.09808	1.416	1.00496	1.05526	1.02693	1.10242	1.06495	0.906541	0.928369	0.979576	1.05705	1.08795	0.930954	0.871864	0.985581	0.922727	0.9457	0.860864	0.940564	1.07257	1.03543	1.01382	1.07128	1.04442	0.994907	0.927806	1.0038	1.0481	0.975226	1.00217	0.973608	0.949521	1.00981	1.02684	0.995905	0.966594	1.02577	1.00298	1.41379	1.10305
229		2	37001..38000	0.934892	0.880218	0.993108	0.979319	0.848368	0.934426	1.13325	1.23284	0.846535	1.07186	0.944039	1.2012	0.964912	1.18918	0.867577	0.855318	1.0133	1.04837	0.878581	0.962185	0.914294	0.935072	0.939007	0.945513	0.871468	0.929128	0.992698	0.901953	0.893357	1.00555	0.865641	0.918918	0.796892	0.957812	0.890087	1.03006	0.937559	0.873031	1.00123	0.919721	0.909473	0.945662	0.928076	0.954282	1.82558	0.984871
230		2	38001..39000	0.955019	0.947341	0.907376	1.03299	0.913819	1.01688	1.06633	1.36386	0.940434	1.03985	1.06079	0.963303	1.11653	0.950326	0.865576	1.02338	0.922184	1.05266	1.10538	1.01398	1.04593	0.942919	1.0392	1.0093	0.988279	1.1375	1.15986	1.03269	1.09007	1.09933	0.998439	1.07266	1.00974	1.0781	1.03224	1.06227	1.13991	1.08589	1.17426	1.12273	1.11009	1.01709	1.09412	1.11987	1.8241	1.0331
231		2	39001..40000	1.019	0.946543	1.02586	1.00805	1.12213	1.11501	1.12379	1.34956	1.04446	0.973709	1.17358	1.11017	1.14339	0.949695	0.937714	1.02907	0.981147	1.07503	1.09564	1.09088	1.01781	1.02329	1.08757	1.00184	0.95219	1.18084	1.15148	1.13977	1.11103	1.09091	1.11084	1.06236	1.08046	1.09297	1.09906	1.11126	1.12006	1.06115	1.11913	1.07475	1.15803	1.09454	1.17809	1.1734	1.55118	1.14047
232		2	40001..41000	1.1682	1.07911	1.13468	1.2343	1.19631	0.981644	1.09758	1.30447	1.20594	1.07737	1.2276	1.10043	1.02657	0.970233	1.12488	1.05697	1.11092	1.15125	1.09773	1.20823	1.12915	1.10009	1.05416	1.09422	1.18308	1.15727	1.25211	1.0823	1.12252	1.21024	1.16402	1.13589	1.11055	1.1895	1.10458	1.09142	1.14012	1.10115	1.13643	1.05028	1.10807	1.26023	1.10169	1.07403	1.21704	1.10756
233		2	41001..42000	1.08658	1.22675	1.12641	1.2223	1.27443	0.947276	0.866806	1.0764	1.12995	0.940026	1.11093	0.986244	1.00128	0.954435	1.14304	1.09687	1.2305	1.08707	1.03955	1.1901	1.1375	1.13019	1.09446	1.09837	1.13869	1.02734	1.11609	1.00192	1.02667	1.089	1.00198	1.1069	1.0606	1.03614	1.1658	1.10022	1.04785	1.03637	1.04862	1.00138	1.07199	1.12891	1.11177	0.961285	1.55874	0.991307
234		2	42001..43000	0.904864	1.0213	0.93051	1.14316	1.10317	0.949498	0.986816	1.38498	1.08019	1.16938	1.04721	0.979791	1.07622	1.00522	0.944311	1.02588	0.94731	0.981907	0.993618	0.992982	0.898405	1.03564	0.990629	0.979989	1.02893	1.08712	1.00934	1.0017	0.979664	1.12003	1.07733	1.04532	1.05367	1.04588	1.00179	1.07231	0.98616	0.973141	1.07339	1.01343	1.06889	1.00853	1.06564	1.15256	1.6309	1.01981
235		2	44001..45000	0.929273	0.863974	1.00158	0.922743	1.06142	0.980988	0.944665	1.21249	1.01344	1.09539	1.07467	1.00148	1.09969	0.956337	0.890388	0.978232	0.980336	0.83143	1.02613	0.884193	1.035	0.970095	0.986219	0.931501	0.877913	0.969612	1.03405	1.03613	1.07203	1.01457	1.10138	1.05999	1.03255	1.11616	1.10938	1.09679	1.07373	1.15079	1.00541	1.05264	0.991184	0.935953	1.07771	1.06786	1.87628	1.00094
236		2	46001..47000	0.982622	0.901226	0.893852	0.966218	0.907394	0.95095	1.07956	1.26671	0.97828	1.1235	0.937981	1.07324	0.974704	1.10329	0.91379	0.863471	0.983749	0.902462	0.932231	1.01182	0.874359	1.0236	0.793945	0.983895	0.840507	0.96232	0.933323	0.911191	1.02403	0.88565	1.03336	0.955945	0.900207	0.970523	0.942265	0.902186	0.938851	0.912569	1.00207	0.887646	0.916528	1.0514	0.991872	0.997726	1.67895	1.02065
237		2	52001..53000	1.10631	1.06739	1.0956	1.15046	1.02128	1.13421	1.08045	1.26996	1.05457	1.04957	1.04633	1.1255	0.983738	1.02661	1.01606	1.08339	1.06625	1.14185	1.17101	1.05979	1.17481	0.992861	1.03076	1.12982	1.03411	1.08474	1.09151	1.12408	1.07142	1.12434	1.12218	1.05258	0.979062	1.06053	1.00531	1.00426	1.09058	1.06586	1.08522	1.03276	1.10267	1.14289	1.06258	1.11285	1.32204	0.988402
238		2	53001..54000	1.02713	1.07806	1.08341	1.12844	1.1481	1.0491	1.12907	1.23995	1.09962	1.00389	1.13384	1.28854	0.879983	1.01704	1.21009	1.14778	1.13376	1.25139	1.11688	0.97401	1.24622	1.09934	1.13398	1.07146	1.05001	1.05918	1.12845	1.09785	1.13346	1.10538	1.09382	1.13339	0.974989	1.1672	1.06949	1.07212	1.11887	1.10023	1.04404	1.12591	1.17574	1.08918	1.13817	1.1644	1.37528	1.04349
239		2	54001..55000	0.903725	0.961226	0.988901	1.06341	0.979271	1.08312	0.913722	1.09786	0.894069	0.929099	1.09073	0.986974	0.977722	0.983739	0.977389	0.866019	0.969449	1.04981	1.07446	0.856907	0.951785	1.04923	0.970969	0.939903	0.916654	1.1193	1.04381	1.01246	1.18655	1.109	1.07253	1.13288	1.00629	1.06622	1.11707	1.09778	1.06076	1.08652	1.08217	1.01929	1.05977	1.04131	1.01735	1.06414	1.49865	1.05296
240		2	56001..57000	1.13117	1.05848	1.12052	1.03451	1.28598	1.04304	1.10118	1.21801	1.00753	1.05061	1.11849	1.05532	1.08319	0.999778	1.10253	1.05823	1.01703	1.0479	1.02086	1.11518	1.06856	1.12623	1.10392	1.10152	1.09594	1.16324	1.08927	1.10222	1.14613	1.07258	1.12659	1.09875	1.01935	1.02861	1.05142	1.1302	0.972092	1.04032	0.996689	1.0284	1.11322	1.06479	1.01144	1.09971	1.8315	1.0714
241		2	57001..58000	1.17176	1.02243	1.18676	1.08117	1.07111	1.1869	1.07221	1.22417	1.14838	1.13563	0.97783	0.949695	1.06186	1.02019	1.14274	1.06937	1.14418	1.0022	0.978106	1.07163	1.13545	1.04799	1.14217	1.12201	0.952594	1.08415	0.989739	0.95879	1.0229	1.05914	1.00739	0.99983	0.998911	1.03055	1.04557	0.91516	1.02897	0.998324	1.02845	1.00093	1.00775	0.931369	0.989654	1.08106	1.58967	0.990199
242		2	59001..60000	1.05631	1.01123	1.12412	1.01484	1.03001	0.909199	1.0657	1.10196	0.92774	0.88389	1.13714	0.9864	1.03196	0.807108	1.10906	1.04286	1.09409	1.11168	1.13571	1.08138	1.00135	1.05565	1.11689	1.06204	1.00202	1.09412	1.1315	1.05301	1.00155	1.11479	1.09695	1.07643	1.13272	1.11943	1.00225	1.04381	1.05036	1.03935	1.11097	0.987613	0.981583	1.08574	1.10872	1.07017	1.0391	1.10999
243		2	62001..63000	0.870354	0.892283	1.17027	0.93959	0.930871	0.961044	1.15761	1.22624	1.00794	1.0248	1.00913	0.91958	1.23143	0.853666	0.934978	0.984175	0.975728	0.936161	1.03523	0.964277	1.19904	1.12551	0.931787	0.995396	0.931283	0.950942	0.961948	1.02881	0.997711	0.988046	1.01004	1.02142	0.945068	0.995084	0.975754	0.955223	0.951265	1.08499	0.963711	0.946716	0.948613	0.906703	1.06167	0.975683	1.67092	1.01024
244		2	63001..64000	0.987387	0.980166	0.97268	0.86476	1.0652	1.03348	1.06276	1.17088	0.965248	1.16007	1.0479	1.12834	1.17069	0.998182	0.860341	0.976718	0.843493	0.840106	0.987289	0.844241	0.91371	0.961266	0.968111	0.913819	0.938825	1.08339	1.07648	0.942808	0.975734	1.02538	1.02445	0.96935	0.986648	0.946082	1.08552	0.914536	0.928902	0.984591	1.02072	0.99707	1.08138	0.923134	0.966373	1.01186	1.64112	0.950519
245		2	66001..67000	0.9734	0.992377	1.06003	1.01634	1.10212	0.969328	1.00061	1.17491	0.947381	1.11424	0.983718	1.12821	1.05069	0.847553	0.865055	1.15317	1.01458	1.00593	1.01534	1.06033	0.948406	1.00464	0.979028	0.871839	0.924767	0.983961	0.98249	1.0198	1.03741	1.04472	1.11148	0.999821	0.935805	1.07218	1.06582	1.02776	1.00666	0.977479	1.04237	0.998742	0.979077	0.974953	0.995313	1.09561	1.6187	0.922192
246		2	68001..69000	0.970615	0.971977	1.05914	0.975295	1.04383	1.01159	1.04163	1.17432	0.923944	1.11738	1.08896	1.01764	1.13962	0.869176	0.98247	1.0916	1.03273	0.986794	1.03447	1.0751	1.20315	0.959388	1.03272	1.00663	0.94527	1.04788	1.12874	1.05198	1.11375	1.16324	1.09973	1.10258	1.06362	1.03359	1.08106	1.08081	1.07143	1.22982	1.06087	1.01296	1.04159	1.01644	1.08651	1.15831	1.20566	1.06621
247		2	72001..73000	1.16143	1.10401	1.15522	1.19137	1.16711	1.06141	1.02783	1.11001	1.13719	1.02303	1.09626	1.08471	1.01237	0.99719	1.19421	1.1887	1.24454	1.23469	1.17908	1.14809	1.25725	1.05939	1.1287	1.14621	1.06609	1.08899	1.13624	1.08727	1.15853	1.09853	1.28832	1.11558	1.0023	1.19828	1.17948	1.19343	1.01048	1.07199	1.15616	1.02439	1.06627	1.04014	0.992226	1.15286	1.04593	1.12926
248		2	73001..74000	1.09208	1.22693	1.14907	1.2755	1.14497	1.03414	1.05138	1.08979	1.22111	1.06081	1.12762	1.05956	1.07131	0.92579	1.17754	1.14487	1.12558	1.14213	1.14098	1.1014	1.32385	1.08737	1.18074	1.24942	1.20973	1.10135	1.07034	1.09639	1.18634	1.08541	1.1792	1.06574	1.08856	1.2428	1.16259	1.18616	1.13533	1.13402	1.08883	1.04219	1.06929	1.03565	1.09591	1.22151	1.04489	1.14733
249		2	74001..75000	1.12449	1.16728	1.09013	1.14082	1.17526	0.912811	1.10234	1.16142	1.26454	1.03499	1.28051	1.15923	0.974655	1.07252	1.06889	1.10056	1.24344	1.16891	1.14125	1.07826	1.17181	1.15937	1.13727	1.23089	1.10856	1.14691	1.13813	1.11553	1.10969	1.15878	1.21778	1.14292	1.09954	1.2622	1.17407	1.15237	1.16736	1.12387	1.0542	1.16688	1.15866	1.16448	1.15479	1.18112	1.27829	1.12452
250		2	77001..78000	0.868312	0.877691	0.865951	0.780228	0.816216	1.19912	1.06295	1.14993	0.782013	0.978677	0.986259	1.06757	1.07782	0.980242	0.896878	0.887675	0.879081	0.795162	0.935373	0.80616	0.672327	0.867527	0.905795	0.882452	0.84905	0.976355	0.962423	0.902317	0.966185	0.922541	1.08652	0.998036	0.937366	0.994896	1.07395	0.98133	0.89749	0.900147	0.988447	0.908393	0.855579	0.903388	0.892073	1.05244	1.56048	0.97915
251		2	214001..215000	0.911869	0.916391	0.960824	0.837706	0.934971	1.06243	0.957374	1.09047	0.854949	1.04451	0.954753	0.96743	0.94221	0.838638	0.859476	1.09264	0.955878	0.961651	0.937815	0.980894	0.961255	0.970023	1.04259	0.881165	0.850069	1.052	1.01162	0.987133	0.973553	0.968098	0.948381	0.962648	0.956777	1.00034	0.979228	0.894722	0.939408	0.95478	0.959309	1.05749	0.949156	1.01928	1.0002	0.966668	1.06868	0.947051
252		2	216001..217000	0.987486	1.08545	1.08115	1.07453	0.978256	1.19794	0.953352	1.03119	1.02532	1.10986	1.15611	0.993379	1.01449	0.945558	1.10681	1.11983	1.13224	1.02002	1.15324	1.07878	1.14399	1.11688	1.06154	1.07247	1.09362	1.04933	1.15758	1.14519	1.1054	1.13521	1.07378	1.11223	1.07843	1.20404	1.07481	1.19135	1.12699	1.12847	1.11157	1.10045	1.05915	1.09622	1.06912	1.11958	0.955206	1.13597
253		2	217001..218000	1.05819	0.949149	1.10084	0.995353	1.03014	0.978617	1.0098	1.04637	1.03091	1.15431	1.16408	1.05186	1.16635	1.12763	1.04319	1.08781	0.920624	1.19914	1.04894	1.03319	1.00001	1.04693	1.05048	1.04325	1.01942	1.08096	1.15436	1.02724	1.01378	1.10008	1.01746	1.16432	1.08181	1.10824	1.03367	1.03416	0.962896	1.04568	1.04376	1.03577	1.01453	1.14905	0.979653	1.19101	0.990618	1.13688
254		2	256001..257000	1.41167	1.37085	1.19374	1.34861	1.27979	0.989954	1.07741	0.917431	1.42283	0.935784	1.07599	0.937392	1.02815	0.981058	1.32561	1.41794	1.24598	1.34039	1.10732	1.47433	1.27954	1.28653	1.1718	1.29645	1.2287	1.09393	1.04417	1.08974	1.16967	1.10089	1.29305	1.21103	1.15906	1.25083	1.18862	1.18089	1.12005	1.1441	1.15448	1.08646	1.16297	1.06755	1.09919	1.13626	0.537413	1.155
255		2	291001..292000	0.978228	0.7657	0.885428	0.890357	0.864163	0.953425	0.905235	0.984484	0.990498	1.08007	1.00707	1.08409	0.932684	0.907682	1.03496	0.856738	1.00099	0.894049	0.921874	0.931987	1.03142	0.823603	0.984824	0.981665	0.937965	1.01972	1.03266	0.894037	0.988977	0.973352	0.940892	0.918526	0.969105	0.916039	0.978194	0.958018	1.0278	0.981616	1.01503	1.01232	1.01985	1.05427	1.05579	1.03266	1.67413	0.982064
256		2	498001..499000	1.23313	1.29073	1.25081	1.30229	1.14476	1.05796	1.07264	0.970237	1.2993	0.900351	1.08784	1.06242	1.09215	1.06397	1.06806	1.26184	1.34171	1.3275	1.12897	1.26032	1.2306	1.3	1.20018	1.26495	1.26701	1.0578	1.05144	1.1168	1.1254	1.07846	1.27398	1.10832	1.23074	1.15092	1.20019	1.19157	1.0861	1.05214	1.11367	1.07821	1.04499	1.0069	1.12404	1.16079	0.85334	1.12276
257		2	509001..510000	1.12723	1.15635	1.2338	1.20271	1.20923	1.10666	1.04738	0.976139	1.34317	1.00161	1.17103	1.00448	0.970178	1.04895	1.13222	1.30583	1.29834	1.28678	1.15309	1.29732	1.28524	1.19633	1.24531	1.34156	1.43287	1.26304	1.16322	1.20321	1.19048	1.24161	1.08909	1.28165	1.26019	1.27045	1.25294	1.21627	1.15436	1.16806	1.30938	1.19307	1.15404	1.20358	1.21098	1.18464	0.80406	1.12973
258		2	526001..527000	1.40019	1.16995	1.18601	1.22418	1.323	1.14425	1.08156	1.09067	1.41612	1.01637	1.21061	1.00496	1.06813	0.909649	1.22476	1.45575	1.30142	1.2511	1.18338	1.37054	1.19911	1.37537	1.21712	2.47286	2.54817	1.20256	1.21426	1.21114	1.08958	1.11874	1.17336	1.09875	1.2192	1.26158	1.20791	1.34137	1.23815	1.20817	1.23889	1.23911	1.16598	1.14983	1.18759	1.1618	0.68852	1.21785
259		2	527001..528000	0.973078	0.883667	0.972592	0.888712	0.954513	0.975766	0.977135	0.977909	1.20794	0.831773	0.997967	0.940108	0.841681	0.828574	1.06491	1.11631	1.01503	1.04095	0.942821	0.952977	1.00857	1.13283	0.911337	2.22159	2.13425	1.01941	1.02746	1.00343	0.959396	0.986931	0.961177	0.962475	1.03888	1.0384	1.00858	0.932178	0.91097	0.883409	0.925	0.90261	0.910379	0.871632	0.913178	0.895424	0.900182	0.890038
260		2	528001..529000	0.919296	0.891699	1.03255	0.99567	0.970199	0.962496	0.919087	1.01196	1.06887	0.919269	1.0823	1.01348	0.923246	0.828843	1.03645	1.12944	1.06076	1.02163	0.973874	1.01457	1.02452	1.06926	0.880964	2.17503	1.90536	0.994792	1.00316	0.994064	1.03204	0.992812	0.939703	1.01471	1.09545	1.10001	0.896772	1.04556	0.960803	0.955481	0.891468	0.995	1.03438	0.975515	1.0801	0.802286	0.882215	0.996474
261		2	529001..530000	1.13084	1.2313	1.23355	1.20624	1.22335	1.00138	1.05044	1.11597	1.35412	1.04103	1.18859	1.04057	0.990227	0.993071	1.12411	1.1585	1.12074	1.2674	1.1445	1.2212	1.25666	1.1376	1.28347	2.50576	2.40943	1.28665	1.27024	1.21162	1.20137	1.21614	1.09957	1.15777	1.26784	1.18827	1.12853	1.25528	1.25519	1.0781	1.18149	1.24215	1.21144	1.16846	1.23445	1.15839	0.852295	1.1368
262		2	530001..531000	1.09326	1.00395	1.06453	1.11895	1.00123	1.08765	1.03514	1.07442	1.25615	1.00139	1.14736	0.898244	1.0266	1.00336	1.2539	1.26597	1.29083	1.34069	1.16082	1.26892	1.20082	1.19022	1.21579	2.65808	2.61792	1.22504	1.21122	1.22172	1.2042	1.24986	1.17576	1.1933	1.26479	1.27073	1.21178	1.182	0.909483	0.815744	0.886413	0.843131	0.881776	0.886303	0.870454	0.81321	0.727801	0.835717
263		2	531001..532000	0.966382	0.971864	1.08571	1.17992	1.12643	1.07313	1.12579	0.987949	1.24266	0.943304	1.16822	0.933051	1.12031	1.04112	1.15293	1.3061	1.23115	1.23529	1.18963	1.34224	1.1014	1.22052	1.18985	2.59079	2.66319	1.2837	1.15314	1.29438	1.18965	1.18285	1.07093	1.22795	1.28073	1.28255	1.20039	1.30933	1.08969	1.06205	1.06475	1.07537	1.01892	1.07278	1.11941	1.04696	0.931784	1.01725
264		2	532001..533000	1.31809	1.12658	1.11144	1.21289	1.11112	1.16073	0.985722	1.17724	1.32598	1.05059	1.16381	0.996445	0.962752	1.08941	1.16029	1.21808	1.20373	1.27488	1.15026	1.24065	1.13269	1.18669	1.15246	2.48453	2.43412	1.21684	1.14094	1.24526	1.17414	1.12107	1.14396	1.20749	1.2508	1.25589	1.13183	1.16186	1.19748	1.1623	1.13139	1.20778	1.16392	1.10293	1.18465	1.14005	0.650884	1.13301
265		2	533001..534000	1.18183	1.05711	1.0959	1.09553	1.19061	1.18446	0.999867	1.01309	1.24834	0.946704	1.02511	0.982682	0.983846	1.02225	1.19145	1.14706	1.17225	1.16807	1.11404	1.08626	1.06242	1.12467	1.17332	2.4086	2.27683	1.107	1.10908	1.14339	1.14106	1.1325	1.0763	1.05435	1.07872	1.15043	1.09555	1.2411	1.05532	1.1273	1.0902	1.09735	1.12501	1.13412	1.07198	1.05565	0.519175	1.05726
266		2	534001..535000	1.00022	1.06636	1.06784	1.19562	1.10189	0.907563	0.853971	0.927659	1.07541	0.84542	0.873414	0.822732	0.997603	0.965121	1.14941	0.953284	1.05377	1.10692	0.825593	1.07694	1.02735	0.958045	0.977457	2.14966	1.87609	0.745513	0.695325	0.802281	0.834018	0.851681	0.844335	0.7819	0.691124	0.721618	0.874651	0.799174	0.992518	1.09774	0.920928	1.01414	1.03445	0.922356	0.94185	0.975692	0.842083	1.06504
267		2	535001..536000	1.07022	1.13829	1.04689	1.14038	1.34564	0.995614	1.10915	1.13989	1.33061	1.03605	1.00257	1.09093	1.12665	0.98898	1.16229	1.09377	1.14068	1.22123	1.26958	1.10333	1.19576	1.22232	1.16562	2.41696	2.24982	1.15182	1.12254	1.2603	1.10887	1.10928	1.13653	1.18091	1.15824	1.25191	1.05412	1.10573	1.10833	1.06182	1.13321	1.20178	1.18935	1.08611	1.24294	1.03918	1.00493	1.18964
268		2	536001..537000	1.10648	1.01771	1.14671	1.08319	1.20192	1.05867	1.14333	1.11301	1.1491	1.03123	1.12502	1.0506	1.08571	1.00227	1.14771	1.15286	1.01626	1.05658	1.21041	1.1185	1.103	1.05395	1.08328	2.27707	2.24465	1.15099	1.12221	1.13485	1.22987	1.1748	1.13736	1.13299	1.10164	1.2386	1.16279	1.08742	1.05925	1.12188	1.1005	1.17969	1.11986	1.11994	1.16792	1.11017	1.03456	1.14796
269		2	537001..538000	1.1772	1.11071	1.18761	1.17996	1.08026	1.15542	1.04995	1.12078	1.0593	1.04592	1.06199	0.894292	0.953295	0.876811	1.16661	1.15573	1.08272	1.11026	1.17559	1.21789	1.20092	1.17631	1.16647	2.33614	2.16786	1.19801	1.17598	1.17028	1.18702	1.1393	1.14119	1.21109	1.1925	1.22253	1.12611	1.16415	1.21848	1.19949	1.16291	1.16185	1.30164	1.1265	1.28477	1.12929	1.08982	1.19218
270		2	538001..539000	1.12648	1.16045	1.06581	1.15895	1.08836	0.969879	1.0911	1.11812	1.06256	1.08895	1.12716	0.914002	1.13903	0.870558	1.06511	1.12557	1.07675	1.20467	1.13172	1.07474	1.14638	1.03665	1.03859	2.34883	2.35312	1.14626	1.23398	1.21421	1.21848	1.04392	1.08837	1.06881	1.16874	1.14808	1.07241	1.25851	1.14877	1.13311	1.05397	1.1055	1.15204	1.04223	1.17322	1.04369	0.86094	1.12122
271		2	539001..540000	1.16142	1.13163	1.21786	1.16809	1.19359	1.13122	1.04675	1.14167	1.18215	0.975324	1.0485	1.09136	0.977929	1.04905	1.02815	1.11806	1.26676	1.05932	1.14459	1.05966	1.16109	1.01832	1.23022	2.34881	2.25792	1.16984	1.1844	1.1705	1.12677	1.05421	1.11447	1.09151	1.16807	1.18037	1.25487	1.11786	1.14593	1.19117	1.15166	1.10992	1.09881	1.12083	1.10775	0.997317	0.814639	1.15296
272		2	540001..541000	0.809133	0.722517	0.768539	0.748873	0.836867	0.908752	0.884197	0.825161	1.15842	0.765565	1.04642	0.860283	0.839077	0.819167	0.975198	1.01407	1.01533	1.05975	1.01494	1.03807	1.09821	1.04196	1.16309	2.18969	2.09388	1.10881	1.10638	1.07633	1.02356	1.09607	0.961089	1.07325	1.09739	1.09842	1.11595	1.08509	1.0836	1.06939	1.02382	1.03911	1.11012	1.0786	1.11841	0.981978	1.25241	0.988366
273		2	541001..542000	0.653951	0.669359	0.691888	0.821394	0.714013	0.654616	0.778674	0.728212	0.770867	0.697735	0.676411	0.60549	0.668895	0.661961	0.738366	0.732564	0.833791	0.730488	0.63622	0.806517	0.723725	0.714978	0.934187	1.60492	1.56256	0.697303	0.68566	0.673361	0.627825	0.725769	0.650245	0.671246	0.66231	0.78524	0.67337	0.715054	0.741456	0.777319	0.675113	0.802168	0.766863	0.684347	0.810635	0.665061	0.660999	0.706093
274		2	542001..543000	1.10968	1.00375	1.07455	1.16746	1.09114	1.11237	1.10859	0.939326	1.13458	1.06121	1.08263	1.17231	1.06927	0.938452	1.15065	1.17131	1.16939	1.30431	1.03238	1.02154	1.1678	1.17105	1.16386	2.50816	2.25579	1.13567	1.10545	1.14779	1.15081	1.1503	1.03639	1.11174	1.14778	1.10228	1.13189	1.09213	1.08948	1.04134	1.11882	1.15698	1.23808	1.18616	1.15988	1.07661	0.788723	1.0815
275		2	543001..544000	0.97928	1.05595	1.09229	1.13622	1.2649	1.05733	0.944748	1.11802	1.09777	0.998215	1.1132	1.10445	1.12222	1.07226	0.927718	1.17504	1.0441	1.14302	1.10607	1.09373	1.11003	1.20699	1.07353	2.19347	2.14429	1.14514	1.15383	1.16506	1.11742	1.18262	1.1018	1.18965	1.17626	1.14762	1.15228	1.10605	1.1729	1.05651	1.10109	1.05705	1.18831	1.11002	1.09797	1.08498	0.757952	1.08856
276		2	544001..545000	1.14622	1.0646	1.10056	1.1799	1.11983	1.02416	1.15737	1.13032	1.10924	1.07822	1.13037	1.09853	1.00738	1.00117	0.950635	1.23034	1.04658	1.06047	1.20602	1.09472	0.974603	1.18266	1.18646	2.29341	2.12476	1.09987	1.16242	1.21459	1.12669	1.11823	1.10763	1.14418	1.15027	1.24027	1.11591	0.999478	1.03723	1.151	1.05561	1.06708	1.14079	1.06153	1.10735	1.09961	1.1658	1.15139
277		2	545001..546000	1.08262	1.15488	1.10956	1.12943	1.15726	1.05908	1.16538	0.98529	1.17022	0.914018	1.01476	0.996299	1.0626	0.929584	0.987587	1.06313	1.16581	1.0513	1.18496	1.04695	1.10353	1.17688	1.18	2.51744	2.18306	1.03964	1.04491	1.16711	1.05641	1.02899	1.0675	1.1552	1.12486	1.16162	1.0857	1.03673	1.05093	0.975355	1.08543	1.13448	1.07234	1.11902	0.960768	1.02807	0.945091	1.02515
278		2	546001..547000	1.14076	1.0785	1.06608	1.18125	1.15725	0.936989	1.02633	1.01587	1.23725	1.01264	1.12255	1.08943	1.23839	0.919445	0.930466	0.900634	1.16412	1.22901	1.08748	1.06328	1.05433	1.15189	1.0157	2.28546	2.24293	1.15789	1.13205	1.12151	1.09762	1.10224	1.08093	1.17834	1.16617	1.14808	1.14034	1.13246	1.2284	1.19471	1.12486	1.17631	1.06366	1.20038	1.08302	1.03148	0.86243	1.09463
279		2	547001..548000	1.05071	1.15648	1.13073	1.1842	1.14269	0.897241	0.966788	1.09824	1.23047	1.09782	1.14035	1.12509	1.01721	0.950947	1.21415	1.08201	1.09292	1.10064	1.1146	1.04699	1.0636	1.04597	0.997215	2.40688	2.15783	1.24066	1.11981	1.07328	1.11923	1.1077	1.05014	1.08344	1.15071	1.22049	1.17343	1.07905	1.14958	1.11464	1.24478	1.21569	1.12961	1.15213	1.20501	1.07409	0.959403	1.12838
280		2	548001..549000	1.05833	1.10867	1.08299	1.14659	1.08218	1.11922	0.889947	1.0539	1.14709	1.10735	1.04411	1.00181	1.04237	0.981262	0.978254	1.15731	1.09981	0.994084	1.04062	1.01623	1.08507	0.997575	1.04246	2.2842	2.07517	1.11571	1.11042	1.15528	1.14663	1.09988	1.01217	1.09509	1.14034	1.16425	1.08576	1.15749	1.16253	1.09818	1.07776	1.10659	1.15102	1.07885	1.0887	1.05141	0.926021	1.14177
281		2	549001..550000	1.26965	1.17488	1.0251	1.19937	1.00896	1.19729	0.966879	1.13565	1.19152	0.934283	1.09621	0.944488	1.07271	0.968943	1.27492	1.03138	1.18208	1.10038	1.15197	1.05569	1.25725	1.12091	1.11182	2.53216	2.1855	1.16805	1.13168	1.14449	1.11578	1.11776	0.997623	1.02885	1.28792	1.16835	1.20415	1.15151	1.1536	1.09877	1.0668	1.16712	1.12227	1.04893	1.14944	1.02855	0.996208	1.0543
282		2	550001..551000	1.13429	0.987558	1.03209	0.982004	1.08171	1.04102	1.08076	1.13949	1.08538	1.04365	0.959273	1.06409	1.15881	0.930502	1.07317	0.970633	0.991781	0.901279	1.03836	0.857296	1.03382	0.995402	1.07319	2.21759	1.97612	1.27398	1.14777	1.14656	1.06969	1.0967	0.918849	1.05831	1.13732	1.0076	1.16995	1.08137	1.08569	1.05102	1.0732	1.07598	1.08173	1.02278	1.12954	0.886074	1.09707	0.961317
283		2	551001..552000	0.943829	0.968123	0.961265	0.998613	1.02186	0.971261	1.01269	0.965591	0.884736	1.03961	0.917113	0.978827	1.02404	1.0721	1.01419	0.846121	0.873106	1.04107	0.906707	0.87549	0.893336	0.962049	0.97415	2.05927	1.87654	1.13532	1.05946	0.984214	0.865485	0.986691	0.902894	1.02114	1.00831	1.04384	1.063	1.04056	1.03279	0.977088	1.00965	1.08922	1.05702	0.909967	1.04294	0.846979	0.762091	0.956812
284		2	552001..553000	1.10228	1.09407	1.06769	1.07223	1.05221	0.769521	0.703285	0.671719	0.893488	0.73578	0.795559	0.848954	0.923187	0.716701	0.844317	0.949842	0.896693	0.866851	0.708067	0.911774	0.83361	0.874168	0.804697	1.88675	1.76629	0.843203	0.823013	0.707481	0.694787	0.722589	0.668046	0.745228	0.730085	0.76842	0.797758	0.817422	0.977903	0.86015	0.848988	0.92877	0.747419	0.849452	0.845437	0.764569	0.779827	0.836825
285		2	553001..554000	1.16596	1.07823	1.11932	1.10769	0.95214	1.00283	0.926606	0.815465	1.07881	0.903353	0.894834	0.804335	0.85959	0.833295	0.95375	1.14433	1.03856	0.980986	0.960487	1.06077	0.989678	1.00014	0.998542	2.14924	2.10791	1.0638	1.06073	0.951301	0.967619	1.01583	0.884888	0.878202	0.951868	0.966695	1.01223	0.908301	1.03783	0.901129	1.01292	1.09591	0.940481	0.980487	1.06631	0.827319	0.95068	1.00856
286		2	554001..555000	1.01008	1.11332	0.914417	0.961699	1.10496	0.798204	0.855548	0.609053	0.965184	0.751137	0.860499	0.682472	0.66713	0.734047	0.972616	0.992412	1.01945	1.03788	0.947044	1.08372	1.0106	0.979045	0.857227	1.91734	2.10112	1.09069	0.937379	0.910436	0.978976	0.895495	0.814474	0.977428	0.958157	1.01153	0.958207	0.874146	0.780597	0.765429	0.862195	0.841432	0.77741	0.843446	0.868889	0.751494	0.69264	0.709991
287		2	555001..556000	1.05845	1.05961	0.914643	1.00787	1.00338	0.914403	0.982076	1.00345	1.07746	1.05915	1.06859	1.12547	0.949962	0.866838	0.97354	0.986572	1.10336	1.04171	1.01302	1.00058	0.999452	1.08815	1.07192	2.12013	1.98869	1.05043	1.11153	1.13941	1.1484	1.04538	0.977514	1.19368	1.13154	1.21054	1.03343	1.02123	1.03047	1.07557	1.15723	1.06549	1.17263	1.0755	1.05071	0.895145	0.706178	1.03044
288		2	556001..557000	1.01885	0.956586	0.910534	1.03758	0.980716	0.984846	0.961697	0.994815	0.979924	1.01439	0.952561	1.09306	1.05612	1.0533	0.963852	1.03759	0.979384	0.867902	0.979439	0.978309	1.07232	0.994099	1.07347	2.01905	1.85269	1.01148	1.00168	1.05514	1.0137	1.08916	0.982395	1.07747	1.09611	1.03339	1.01296	1.02956	1.13533	1.035	1.10718	1.13757	1.07567	1.03999	1.10171	0.882591	0.827655	1.03155
289		2	557001..558000	0.957915	0.93477	0.940278	0.965554	0.97379	1.18809	1.06925	0.98301	1.06198	1.04478	1.06438	0.991121	1.06317	0.894844	1.0538	0.976765	1.11621	1.00569	1.06818	1.0343	0.979405	0.958757	0.923923	2.02224	1.94851	1.11103	1.09789	1.02841	1.04265	1.1046	1.02148	1.05898	1.07644	1.15295	1.10243	1.04178	1.12436	1.07781	1.09027	1.09877	1.06677	1.05056	1.07089	0.98873	0.924145	0.964383
290		2	558001..559000	1.14199	0.95498	1.07974	0.950233	0.91371	1.23852	1.07541	0.9698	0.95677	1.07744	1.03873	0.978701	1.04319	0.992886	1.13264	1.03851	1.12786	1.05575	1.07538	1.08365	0.987173	1.00982	1.16411	2.17344	1.97694	1.02387	1.00891	1.13336	1.12723	0.974468	1.07567	0.995249	1.06283	1.06267	1.061	1.00208	1.13549	1.03221	1.03494	1.03608	1.06054	0.986401	1.04467	1.04184	1.06197	0.985765
291		2	559001..560000	1.16879	1.33845	1.30287	1.04103	1.14279	1.11802	1.05739	1.03118	1.16382	1.08556	1.12439	0.99881	0.951204	0.936708	1.15958	1.08829	1.17982	1.07072	1.15521	1.2776	1.21416	1.21126	1.11832	2.45215	2.27462	1.05134	1.18738	1.12945	1.11669	1.09081	1.08813	1.09348	1.1134	1.1461	1.19966	1.06537	1.09681	1.13057	1.1754	1.08589	1.17769	1.16731	1.15186	1.09421	0.962865	1.06921
292		2	560001..561000	1.23658	1.32271	1.07539	1.19309	1.15747	1.12715	1.07689	1.03395	1.23556	0.910443	1.08535	0.946094	1.10258	1.02164	1.1965	1.1918	1.13276	1.25769	1.1335	1.25718	1.14837	1.0883	1.17946	2.62453	2.21664	1.08311	1.18092	1.14051	1.09178	1.0733	1.00505	1.15028	1.04297	1.21557	1.18143	1.12374	1.09277	1.0864	1.10578	1.13595	1.14997	1.0307	1.25427	0.990593	0.985358	1.17526
293		2	561001..562000	0.966827	1.19048	0.982487	1.19498	1.05593	0.949638	1.06445	1.02385	0.975806	1.09862	1.0331	1.04267	1.11942	0.970659	1.14281	1.08267	1.03892	1.14771	1.11722	0.976921	1.15343	1.05921	1.09836	2.15777	2.12165	1.06829	1.09472	1.07215	1.06615	0.966899	1.14014	1.0865	1.00276	1.04936	1.10463	1.10653	1.12763	1.0815	1.04971	1.0551	1.06816	1.06718	1.05942	0.990108	0.801256	1.12295
294		2	562001..563000	1.01232	1.12366	1.04349	1.16064	1.13293	1.13169	1.032	1.08154	1.09935	1.0584	1.05703	1.07455	0.869244	0.9304	1.11462	1.04862	1.01031	1.01693	1.07923	0.99562	1.15917	1.0858	1.14073	2.14475	2.09387	1.04807	1.09447	1.09233	1.04992	1.05576	1.13104	1.16315	1.10079	1.15338	1.11197	1.07439	1.04899	1.16715	1.11993	1.08848	1.10639	1.06728	1.11081	1.09427	0.959151	1.06152
295		2	563001..564000	1.10282	1.03144	1.08464	0.99454	1.02619	1.22676	1.08447	1.13177	0.966352	0.973816	1.04262	1.15807	1.0244	1.00804	1.04067	1.11731	1.13114	1.16856	1.09784	1.0386	1.07349	1.02631	1.07144	2.20429	2.10096	1.02955	1.05338	1.1344	1.04301	1.02489	1.05288	1.06006	1.18777	1.02868	1.07217	1.0371	1.09045	1.03437	1.16511	1.09229	1.04928	1.07987	1.01497	0.992278	1.37331	1.07782
296		2	564001..565000	0.922267	0.986985	1.08591	1.00577	0.897907	0.943357	1.03352	1.05719	0.937178	1.0829	1.22045	1.08082	0.958295	1.02752	0.939289	0.947717	1.06141	0.884393	1.05266	0.97402	1.04253	1.02959	1.07937	2.01401	2.04698	1.09794	1.15193	1.19584	1.02593	1.05133	1.1151	1.17184	1.10384	1.07268	1.0448	1.07133	1.09278	1.1202	1.12235	1.01859	1.18308	1.03617	1.04337	1.00519	1.12948	1.03891
297		2	565001..566000	1.01177	1.00196	0.925744	0.915588	0.997385	0.991581	1.02363	1.08029	0.919858	1.09417	0.936867	1.05124	1.05739	1.09939	0.926356	0.975768	0.993249	0.954672	1.09224	1.01972	0.986723	0.882949	0.934382	1.93959	1.91508	1.00889	1.02019	1.05131	0.986521	0.97597	0.939419	1.13115	0.990656	1.08795	0.970542	0.907479	1.03579	0.962724	1.01105	1.0483	0.96546	0.998954	1.07573	0.977555	1.03471	0.992675
298		2	566001..567000	1.13772	1.07753	1.03004	0.980607	1.06691	1.06126	1.12846	1.17835	1.05866	1.07386	0.97003	1.13578	1.16064	0.991995	0.96769	1.00639	1.02345	0.812346	0.968728	1.06944	0.934693	1.11157	0.883208	2.18044	1.88275	0.979357	0.997725	0.976201	1.04154	0.99743	0.98937	1.04148	1.02439	0.99383	1.07914	0.951754	1.03804	1.07678	1.06003	1.10738	1.05402	1.06963	1.08445	0.967888	1.1795	1.09058
299		2	567001..568000	1.05523	0.968573	1.01439	0.989546	1.05043	0.956513	1.08405	1.0399	0.903474	0.952427	1.01531	1.07005	1.12131	1.00314	1.0075	1.00512	1.09609	1.00252	1.07344	0.913172	1.1156	1.08753	1.02824	2.14786	1.85925	1.08393	1.04282	1.04133	1.00996	1.00834	0.934715	1.00868	1.02472	0.987036	1.0842	1.08013	1.03579	1.05626	1.1298	1.03231	1.0402	1.09016	1.10855	0.938599	0.862642	1.03426
300		2	568001..569000	0.886049	1.02198	0.940984	0.930096	0.949376	1.092	1.03941	1.03167	0.957277	0.99365	1.03867	0.919015	1.06238	0.916207	0.877727	0.956989	0.873086	0.976983	1.006	0.891698	1.04243	0.910261	0.918401	2.08579	1.74961	1.06273	1.00271	1.03342	0.97035	1.02601	0.988713	1.00825	0.99977	0.994436	0.955546	0.990211	1.01306	0.958066	1.05529	0.974519	1.00587	1.12081	1.01359	0.972684	1.01065	0.951467
301		2	569001..570000	0.726807	0.824184	0.79491	0.821503	0.789326	0.78894	0.776863	0.757862	0.731618	0.713529	0.739719	0.738985	0.7277	0.734502	0.756368	0.712873	0.798537	0.806825	0.775383	0.804415	0.750276	0.733149	0.822093	1.61146	1.59436	0.795053	0.728452	0.760787	0.690081	0.761545	0.756022	0.748133	0.746363	0.714022	0.734982	0.766119	0.73725	0.80745	0.767877	0.72142	0.783429	0.722825	0.75149	0.658849	0.869179	0.715193
302		2	570001..571000	0.92858	0.849662	0.807904	0.813288	0.754129	0.723746	0.786827	0.676189	0.808786	0.76543	0.684406	0.692352	0.701005	0.732424	0.859429	0.889566	0.933284	0.945674	0.734365	0.862236	0.772911	0.854695	0.879852	1.84072	1.77957	0.842077	0.741077	0.75548	0.750442	0.80689	0.781126	0.686217	0.810552	0.754925	0.851388	0.814181	0.687994	0.708953	0.714887	0.732786	0.729686	0.713086	0.721661	0.708506	0.754568	0.636075
303		2	571001..572000	0.78783	0.807883	0.824243	0.858834	0.787772	0.744766	0.836797	0.736988	0.906013	0.748532	0.876439	0.803975	0.866887	0.815308	0.805281	0.86931	0.864943	0.83394	0.863479	0.779136	0.849146	0.790482	0.895414	1.79111	1.5708	0.911381	0.871589	0.807925	0.811058	0.827695	0.799353	0.891143	0.78772	0.806322	0.884282	0.892304	0.872368	0.900107	0.928688	0.843188	0.870766	0.90348	0.872951	0.891504	0.666724	0.894865
304		2	572001..573000	1.11525	1.07671	1.02226	1.11922	1.23662	1.11654	0.950139	0.963643	1.05215	1.02761	1.05485	1.06232	1.09472	1.0455	0.949664	1.0211	1.1657	1.06206	1.08513	0.951716	1.05079	1.18846	1.1245	2.05205	2.02149	1.08582	1.0317	1.07799	1.01419	1.03449	1.04165	1.05036	1.01432	1.0192	1.12525	0.956105	1.07412	0.98411	1.03681	1.11372	1.1155	1.09445	0.998411	1.01708	0.841039	1.02562
305		2	573001..574000	0.968845	0.988636	0.939905	0.980934	1.01793	0.858674	0.777506	0.724693	0.906262	0.753049	0.738861	0.748271	0.845911	0.81978	0.785526	0.793349	0.796248	0.774345	0.685954	0.799317	0.803315	0.861686	0.791535	1.68768	1.64856	0.607686	0.652755	0.624368	0.651894	0.699894	0.701119	0.680034	0.695586	0.675796	0.647666	0.711992	0.734677	0.725221	0.724621	0.703986	0.747812	0.716758	0.67838	0.703411	0.585494	0.666342
306		2	574001..575000	1.06221	1.19973	1.09659	1.13252	1.10184	1.00596	0.930378	1.07833	1.09176	1.10357	1.05024	1.03637	0.937102	1.04072	1.17495	1.10775	1.01133	1.01677	1.10276	1.12152	0.981083	1.09222	1.08846	2.07146	1.95483	1.05797	1.1391	1.03688	1.03592	1.05182	1.04835	1.08285	1.09334	1.00446	1.13249	1.02851	1.07172	1.03469	1.07834	1.04103	1.05282	1.05537	0.948141	1.10565	0.980232	0.989966
307		2	575001..576000	1.0719	1.08499	1.1018	1.04033	1.02846	1.0497	0.943513	1.17637	1.0447	1.07572	1.06091	1.06735	1.01399	0.983674	1.04968	1.02876	1.03577	1.09359	1.14069	1.11325	1.08845	0.97314	1.12742	2.11496	2.17052	1.01053	1.02885	1.05761	1.20136	1.09978	1.05188	1.05941	1.04661	1.07406	0.96333	1.06754	1.14707	1.06299	1.06865	1.09329	1.10509	1.14253	1.14397	1.14289	1.54244	1.09307
308		2	576001..577000	1.21189	1.06961	1.12077	1.08023	1.10256	1.06738	1.08148	1.1121	0.975459	1.0647	1.04982	0.990848	1.1279	0.958971	0.947497	1.09523	1.20845	0.994669	1.03545	1.0416	1.0167	1.03048	0.967691	2.15424	2.04381	1.02247	1.05382	1.03456	1.14272	1.08575	1.04331	0.973075	1.06653	1.07549	1.09302	1.06887	1.11554	1.03757	1.02265	1.00377	1.18125	1.08158	1.02843	1.05277	1.52803	1.08883
309		2	577001..578000	1.00958	0.994298	1.0828	1.09131	0.982426	0.901536	0.876311	0.732629	0.974589	0.745489	0.977974	0.78955	1.03585	0.800225	1.02267	1.08009	1.00574	0.918344	1.00363	1.08704	0.879368	1.04375	1.04168	2.04675	2.04076	0.981923	1.01838	1.0921	1.05123	1.08672	1.13551	0.97006	0.949935	0.972595	0.963132	1.08682	1.04371	1.01887	0.982348	1.02882	1.02224	1.05328	0.997864	0.971855	1.13024	1.06868
310		2	578001..579000	1.01046	0.834025	0.932521	0.888286	0.919574	0.999961	0.98145	1.18722	0.921156	0.949128	0.884783	1.02322	1.09584	0.970548	1.0192	1.02617	1.02569	0.957445	0.884044	0.945851	0.844685	0.898987	0.90361	1.9857	1.88441	0.876425	0.88726	0.981002	1.01377	0.884498	0.999282	0.924719	0.98959	1.00636	0.837953	0.833924	0.943595	0.972009	0.916838	0.952727	0.932148	0.897209	0.869865	0.895527	1.13853	0.975763
311		2	579001..580000	0.402283	0.348677	0.374311	0.383742	0.355351	1.10899	1.07338	1.09514	1.11545	1.15405	1.08874	1.06749	1.0473	1.03715	1.28041	1.06556	1.05308	1.17926	1.10234	1.05781	1.04807	1.08314	1.09712	2.22119	2.23656	1.14699	1.07446	1.10944	1.14181	1.06469	1.10556	1.04172	1.07787	1.13	1.15529	1.14761	0.320626	0.320814	0.329801	0.353446	0.320797	0.337299	0.306836	0.348097	0.426921	0.345489
312		2	580001..581000	0.00147297	0	0	0	0	1.03979	1.05374	1.03577	1.1457	0.956924	0.998842	0.982585	0.986479	0.945966	1.03807	1.02957	1.09293	1.16781	1.08568	0.919531	1.05288	1.04195	1.13845	2.00179	2.02571	1.11071	1.05553	1.07655	1.0423	1.07092	1.07229	0.974841	1.08367	0.998442	0.986748	1.1593	0	0	0	0	0	0	0	0	0	0
313		2	581001..582000	0.0024137	0	0.00050996	0	0	1.20835	1.11358	1.17259	1.19652	1.05272	1.14832	1.06591	1.04283	1.08469	1.17517	1.14567	1.18643	1.18693	1.27461	1.17166	1.25182	1.03473	1.14358	2.43895	2.21254	1.1398	1.12966	1.14788	1.10891	1.13849	1.22063	1.08862	1.23419	1.15694	1.13939	1.17427	0	0	0	0	0	0	0	0	0	0
314		2	582001..583000	0	0	0	0	0	1.06942	0.985071	1.17215	1.26494	1.1262	1.06817	1.2167	1.02062	1.04575	1.1064	1.13855	1.26702	1.06337	1.13111	1.22763	1.14271	1.26188	1.17269	2.40844	2.47699	1.1613	1.14756	1.15365	1.19119	1.15656	1.07637	1.16104	1.17635	1.16375	1.13174	1.20552	0	0	0	0	0.00251605	0	0	0	0	0
315		2	583001..584000	0.000730298	0.00430257	0	0	0.000460654	1.04021	0.903516	1.10341	1.23994	1.02324	1.02114	1.13608	1.02598	0.86169	1.12101	1.21379	1.32288	1.05618	1.22172	1.28198	1.26274	1.25061	1.18368	2.48533	2.50149	1.0666	1.21212	1.09426	1.09607	1.2571	1.10478	1.1456	1.07178	1.21594	1.13121	1.18786	0	0.0024742	0	0	0	0	0.00267961	0	0.00239822	0
316		2	584001..585000	0	0	0	0	0	1.02144	1.00957	1.11614	1.28419	1.0562	1.09654	1.11674	1.04687	1.02452	1.09485	1.16093	1.15516	1.2144	1.0848	1.1638	1.09779	1.21627	1.18026	2.45462	2.34516	1.08714	0.989981	1.12192	1.15112	1.12642	1.19414	1.13662	1.03709	1.11656	1.12512	1.09421	0	0	0	0	0	0	0	0	0	0
317		2	585001..586000	0.00177004	0.00298821	0.00186332	0.00254685	0.00252188	1.08977	0.974457	1.13469	1.16189	1.11985	1.08411	1.0442	1.1213	0.977311	1.16443	1.10896	1.13737	1.10551	1.09723	1.05204	1.12114	1.19776	1.20489	2.46234	2.20287	1.04879	1.05151	1.08308	1.1022	1.08899	1.10216	1.07002	1.05513	1.05333	1.07376	1.02255	0.00145761	0	0.000678676	0.000636189	0.00114732	0.00116631	0.0004073	0.000270074	0.00512522	0.000992219
318		2	586001..587000	0.00397331	0.00337016	0.00372663	0.00218018	0.00335731	0.985904	1.09724	1.12224	1.12821	0.967892	0.990167	1.05752	1.0703	1.10215	1.00382	1.14042	1.18003	1.08126	1.16564	1.14575	0.963772	1.09918	1.20684	2.34112	2.25116	0.97452	1.01267	1.07444	1.0712	1.09325	1.22251	1.1229	1.05964	1.02095	1.05759	1.04312	0.000772829	0.00250425	0.000357198	0.000379815	0.000603853	0.000603616	0.000214369	0.000186258	0.0042549	0.000536335
319		2	587001..588000	0.319177	0.321075	0.290354	0.331388	0.289853	1.00596	1.10906	1.05073	1.25954	1.06546	1.05545	0.974467	1.1287	1.05071	1.19356	1.09551	1.34974	1.25591	1.05114	1.14249	1.23611	1.27359	1.30514	2.76808	2.33638	1.10978	1.10187	1.08333	1.0927	1.14785	1.22487	1.12675	1.05876	1.15686	1.00986	1.13265	0.278003	0.292076	0.264621	0.259176	0.268292	0.236024	0.273481	0.334295	0.182497	0.282112
320		2	588001..589000	1.17944	1.07095	0.97728	1.03107	1.12611	1.03354	0.998799	1.16613	0.945551	1.08263	1.02945	1.02185	0.955681	0.932552	1.15323	1.12381	1.08684	1.06268	1.02126	1.02991	1.07194	1.1504	0.977594	2.33227	2.15264	0.984397	0.963365	1.06047	1.12592	1.04218	1.18329	0.99596	1.01559	1.05637	1.05054	1.05182	1.04875	0.924308	0.917543	0.920405	1.04654	0.965888	0.97498	1.0704	1.00454	1.04253
321		2	589001..590000	0.673347	0.859301	0.867785	0.795014	0.828177	0.811989	0.847771	0.93189	0.997058	0.812888	1.03847	0.781832	0.747256	0.915901	0.982944	1.01368	0.938084	0.931035	1.02346	1.0451	0.973947	1.02808	1.01763	2.10889	1.91001	0.913927	0.939678	1.04404	1.04684	0.987853	1.14323	0.956127	0.920402	0.983694	1.07833	1.06513	0.978451	1.00184	0.98909	1.02859	1.05994	0.976283	1.00689	1.04257	1.03912	0.981501
322		2	590001..591000	1.0783	1.15803	1.1027	1.12369	1.07989	1.07878	1.04486	1.10186	1.12936	1.07252	0.999981	1.07868	1.05398	1.08857	1.12599	1.17701	1.29828	1.15487	1.097	1.14785	1.18637	1.12451	1.18934	2.47824	2.14818	1.03082	1.05999	1.13831	1.0399	1.07475	1.21538	1.0844	1.10578	1.11602	1.2399	1.08952	1.04527	1.12148	1.07376	1.01876	1.04591	1.02081	1.07124	1.22921	1.02222	1.09111
323		2	591001..592000	1.06492	1.24814	1.21949	1.0886	1.19914	1.18854	1.08473	1.10718	1.18635	1.05902	1.11738	1.0572	1.00142	1.12882	1.15262	1.20573	1.07312	1.03553	1.09057	1.09099	1.2018	1.31429	1.20383	2.74175	2.46085	1.08948	1.01495	1.09495	1.13158	1.09364	1.12211	1.07351	1.03637	1.09651	1.11742	1.07527	1.1234	1.10758	1.06958	1.09652	1.1505	1.1001	1.15173	1.14093	1.06314	1.11848
324		2	592001..593000	1.02073	1.06177	1.10384	1.181	1.11483	1.2879	1.0439	1.13095	1.08142	1.06881	1.07749	1.07208	1.07205	0.981949	0.971006	1.14227	0.958765	1.17453	1.16379	1.03039	1.16137	1.18131	1.0064	2.43731	2.15992	1.07519	1.04714	1.07657	1.13401	1.00669	1.18251	1.07745	1.08105	1.04641	1.16006	1.12186	1.17983	1.08255	1.10929	1.03735	1.11806	1.09771	1.06916	1.15829	1.02441	1.07572
325		2	593001..594000	1.00119	0.934309	0.950556	0.990616	0.915818	0.98796	1.13555	1.00956	1.159	1.08182	1.01007	1.16314	1.12546	0.945576	1.12874	0.978833	1.01225	1.03818	1.10713	0.93062	1.11836	1.08873	0.983838	2.21798	2.16095	1.0495	1.0114	1.02937	1.0739	1.03545	1.14558	1.06334	0.961487	1.07973	1.057	1.08014	1.12177	1.02913	1.08243	1.06792	0.99359	1.1092	1.04892	0.935228	1.26017	1.09248
326		2	594001..595000	1.00567	0.96782	0.892303	0.971817	0.941427	1.14085	1.00885	1.07854	1.05849	1.09261	1.04811	0.993593	1.0268	0.952283	1.13061	1.03234	1.19794	1.10199	1.05766	1.04093	1.02448	1.0796	1.01605	2.08744	2.24588	1.0119	1.02344	1.09013	1.06873	1.0486	1.09083	1.06993	1.08196	1.05412	0.995213	1.04068	0.960588	1.02162	1.10978	1.10499	0.998904	1.09414	1.14056	1.04612	1.23553	0.946613
327		2	595001..596000	1.03253	1.01343	0.925774	0.987673	0.866263	0.901562	1.09116	0.932466	1.05484	1.0169	1.05722	1.00715	1.02048	0.89746	1.10281	1.05833	1.12953	1.02008	1.06116	1.10462	1.04971	1.23341	1.14453	2.29286	2.16384	1.03143	1.03754	1.01293	1.04013	0.958686	1.0954	1.01871	1.02576	1.042	1.08191	1.08705	1.07586	1.05415	1.12208	1.06395	1.12839	1.08073	1.07746	0.992539	0.857923	1.02302
328		2	596001..597000	0.889082	0.903079	0.91836	0.881716	0.904724	0.850565	1.0186	0.983168	0.932487	0.871387	0.955169	0.97763	0.884155	0.854083	1.0863	0.912548	0.997219	0.903167	0.95439	1.00056	1.04016	0.942384	1.15102	1.98626	1.88633	0.941389	0.967372	0.90733	1.03253	0.863646	0.983513	0.910485	0.912734	0.909398	0.87298	0.836987	0.948301	0.918318	0.981401	0.911109	1.03567	1.00674	1.06214	0.88776	0.872081	1.04815
329		2	597001..598000	0.843927	0.77562	0.869845	0.748972	0.865193	1.02885	0.99703	1.08393	0.941562	0.97696	0.913833	1.05179	0.939301	0.855187	0.961981	0.976689	1.03812	1.09944	1.04112	1.00445	0.898089	0.939675	1.02738	1.84614	1.78985	0.957949	0.958115	0.920748	0.984271	0.930137	1.03277	0.980806	0.947654	0.914011	0.871111	0.877466	0.997263	0.863245	0.955647	0.912846	0.921057	0.988938	1.06425	0.995771	1.07624	1.00186
330		2	598001..599000	0.805234	0.82888	0.806453	0.688551	0.741793	1.01474	1.04734	1.18884	0.813903	1.12055	0.920452	1.0319	0.981509	1.00591	0.805873	0.788938	0.747018	0.827045	0.987596	0.808105	0.782418	0.784729	0.792023	1.84381	1.58185	0.835871	0.872656	0.880931	0.878355	0.866799	1.02621	0.897399	0.87712	0.817959	0.820538	0.805389	0.880253	0.882267	0.969069	0.925732	0.929752	0.957028	0.830871	0.972712	1.56029	0.903867
331		2	599001..600000	0.744186	0.634444	0.680601	0.613712	0.637248	0.969127	0.97721	1.07427	0.751557	0.916085	0.663683	1.01624	0.887616	0.880308	0.75105	0.781745	0.715157	0.708894	0.645272	0.726508	0.763174	0.634169	0.753719	1.62131	1.41688	0.593001	0.603461	0.558675	0.636401	0.613556	0.662517	0.615824	0.625845	0.566812	0.657517	0.53836	0.576462	0.628837	0.623069	0.57447	0.647149	0.623975	0.57559	0.683994	1.3185	0.564135
332		2	600001..601000	0.839001	0.972358	0.958627	0.909573	1.08407	1.01323	0.907913	0.779308	1.00399	0.82982	0.9342	0.788713	0.859126	0.818648	0.812944	0.888099	1.0083	0.824571	0.796424	0.937305	0.925721	0.811369	0.884779	1.95952	1.81643	0.716145	0.757563	0.703976	0.802629	0.700004	0.750014	0.768732	0.723772	0.693468	0.780981	0.765792	0.815873	0.886214	0.741409	0.822251	0.812464	0.820857	0.793678	0.803171	1.00793	0.786982
333		2	601001..602000	0.963708	0.989939	1.0354	0.995036	1.03854	0.956574	1.05786	0.987333	0.99547	0.992317	1.07818	0.931124	0.971746	0.959537	1.05286	1.0854	1.01424	1.08142	1.14784	1.19725	1.10226	1.0998	1.07892	2.20679	2.07046	1.12826	1.07969	1.05288	1.0481	1.12159	1.12956	1.06018	1.0673	1.06075	1.02356	1.08744	1.10042	1.11181	1.02127	1.12773	1.09522	1.10585	1.0354	1.19012	1.24462	1.08438
334		2	602001..603000	0.762555	0.995601	0.879142	0.965068	0.881363	0.882318	0.903491	0.810253	1.01177	0.883492	0.929136	0.929449	0.948532	0.777572	1.01535	0.890421	0.97113	1.08721	0.807862	0.93679	1.07717	1.00895	0.868066	2.02947	1.85469	0.823458	0.789759	0.755383	0.959229	0.854391	0.876769	0.804858	0.917923	0.800943	0.828344	0.866276	0.820696	0.8781	0.82919	0.828585	0.796392	0.827854	0.827956	0.905706	0.930605	0.876898
335		2	603001..604000	1.04685	0.848314	0.856164	0.844781	0.79786	0.924192	0.983853	0.889837	1.05923	0.98411	1.00634	0.896492	0.921314	0.985038	0.881813	0.939564	1.01515	0.815346	0.854744	0.828359	0.851723	1.00035	0.963457	1.99779	1.96346	0.837077	0.882952	0.876547	0.898613	0.897772	0.934973	0.847076	0.878343	0.839093	0.857017	0.905149	0.829432	0.897583	0.872233	0.88588	0.861608	0.926326	0.866595	0.896886	0.820577	0.902919
336		2	604001..605000	0.978995	0.69942	0.822242	0.856941	0.741488	1.02905	1.01243	1.0165	0.825742	1.09496	0.884086	1.06662	1.06716	0.949175	1.0514	1.01809	1.10148	0.983496	0.937274	0.945346	0.913102	0.91158	0.776988	1.7575	1.77355	0.99035	0.88203	0.949464	1.01892	0.894158	0.981428	0.950846	0.910495	0.850601	0.910822	0.87363	0.906861	0.849241	0.936537	0.905279	0.928042	0.929456	1.00274	0.931735	1.11494	0.910741
337		2	605001..606000	0.897647	0.773474	0.802981	0.797234	0.779426	1.00261	1.06525	1.03388	0.804821	1.18904	0.87293	1.23546	1.09525	0.962264	0.893656	0.865737	1.00274	0.820472	0.914882	0.878276	0.824444	0.915264	0.751982	1.78514	1.53969	0.843091	0.846408	0.888287	0.919391	0.854714	0.918103	0.917625	0.873459	0.886756	0.966585	0.85913	0.829373	0.928235	0.869357	0.870867	0.933557	0.940792	0.931035	0.844902	1.06498	0.93821
338		2	607001..608000	0.887052	0.737908	0.714729	0.599808	0.759298	1.02602	1.05709	1.01422	0.697641	0.992331	0.78866	0.969454	1.00373	0.911615	0.786414	0.793781	0.807206	0.951183	0.739846	0.778201	0.841098	0.877108	0.754343	1.61632	1.39858	0.82433	0.763996	0.737058	0.859561	0.715519	0.796274	0.812517	0.793323	0.712539	0.664465	0.655763	0.828111	0.702682	0.841237	0.74984	0.798042	0.845022	0.745788	0.846308	0.981857	0.828458
339		2	608001..609000	0.893055	0.831643	0.855193	0.827806	0.795892	0.861919	0.767316	0.715568	0.857173	0.882987	0.765524	0.871837	0.83677	0.811542	0.864154	0.869329	0.904805	0.842676	0.831457	0.949519	0.877824	0.878299	0.883394	1.71929	1.70563	0.771941	0.783073	0.776076	0.775828	0.808899	0.797392	0.812899	0.789307	0.734917	0.795339	0.812525	0.897431	0.792515	0.807294	0.7504	0.80866	0.837645	0.768307	0.797956	0.923139	0.921852
340		2	609001..610000	1.01138	0.996826	1.14761	0.959063	1.00255	0.97155	0.872798	0.804044	0.923364	0.995603	0.901131	0.901154	0.93223	0.816616	0.943908	1.13736	0.91078	1.1189	0.961932	1.02222	1.00897	0.957422	0.890467	2.01854	1.89545	0.955951	0.952885	0.87022	0.920256	0.952998	0.913711	0.896315	0.903934	0.867899	1.05069	0.981538	0.983205	0.948399	0.94344	0.932644	0.921369	0.925569	0.951335	0.937519	0.833999	0.92406
341		2	610001..611000	1.05217	1.01777	1.14094	1.09092	1.17538	1.01197	1.04592	0.992914	1.06828	1.01642	1.06919	1.11521	1.15879	0.931847	1.03206	1.07689	1.13065	0.979289	1.02067	1.08735	1.10772	1.07503	1.02875	2.27602	2.21737	0.992693	1.0271	0.965055	0.995255	0.987152	1.11864	1.05923	1.03143	0.982577	1.06828	1.02701	1.07301	0.962413	1.05788	1.06176	0.971952	1.049	1.07132	1.01279	1.03342	1.06841
342		2	611001..612000	1.07804	1.14118	1.05707	1.09469	1.15768	1.02116	1.02872	1.02007	1.20027	1.03762	1.05558	1.00374	1.15649	1.04122	1.23942	1.18366	1.21031	1.0707	1.11062	1.12106	1.17255	1.24846	1.22376	2.71819	2.42501	1.04104	1.12885	0.98448	1.05022	0.985382	1.08616	1.12238	1.08772	1.06678	1.21448	1.11919	1.08171	0.994147	1.06662	1.04221	1.04318	1.03831	1.09935	1.03266	1.10943	1.11425
343		2	612001..613000	1.23037	1.33574	1.06739	1.13823	1.19887	1.03807	0.964326	1.05995	1.38239	0.931112	1.14216	0.959974	1.10533	1.0572	1.20201	1.32923	1.39543	1.32032	1.12106	1.24752	1.35482	1.36408	1.25588	2.80754	2.71101	0.936835	1.12845	1.10222	1.12814	0.996693	1.21596	1.0961	1.0763	1.08674	1.15395	0.999687	1.05	1.12144	1.18836	1.10302	1.07925	1.17397	1.09315	1.17297	0.674847	1.14098
344		2	613001..614000	1.0707	1.22233	1.01377	1.13363	1.25523	1.15286	0.991247	1.09801	1.206	1.03646	1.01211	1.06424	1.06971	0.929843	1.11876	1.19538	1.23977	1.23047	1.04664	1.1379	1.13547	1.26268	1.096	2.5799	2.26073	0.960485	0.937359	1.05745	0.978131	0.993199	1.02462	1.02129	1.0049	1.01769	1.14432	1.02365	1.06408	1.02764	1.00562	0.996415	0.986615	1.00108	0.988314	0.935721	0.944375	0.963525
345		2	614001..615000	1.27057	1.25372	1.03586	1.24611	1.17474	1.0692	1.07019	1.08266	1.21216	1.00623	1.0376	1.07255	1.04594	1.09313	1.17294	1.30633	1.22585	1.39524	1.03935	1.24743	1.27762	1.16866	1.19277	2.43128	2.32805	1.08103	0.976853	1.0166	1.10777	1.01976	1.09028	0.984476	0.96547	1.04245	1.06135	1.10376	1.04093	1.11903	1.09893	1.08547	1.01127	1.02795	1.12228	1.11087	1.10645	1.11281
346		2	615001..616000	1.08766	1.18034	0.981104	1.12089	1.15627	0.913292	1.04711	0.795101	1.21933	0.86728	0.86338	0.855553	0.961943	0.878239	1.10525	1.15223	1.21874	1.32005	0.955593	1.26835	1.14166	1.20894	1.03343	2.45329	2.32427	0.939462	1.02295	0.989104	0.948108	0.907848	0.941043	0.962957	0.932648	0.892152	1.15058	0.939027	0.913944	0.995529	0.955281	0.963799	0.987551	0.981296	1.02628	0.952941	1.06432	0.932141
347		2	616001..617000	0.997252	1.04896	1.02037	0.970182	0.913492	1.00024	1.07859	0.925133	0.972058	1.01921	0.954855	1.05961	1.06766	1.03763	1.1739	1.00621	0.985744	0.886652	0.974004	1.06043	1.03573	1.12102	0.953642	2.18151	1.94923	0.9472	1.00114	0.977567	0.978052	0.986673	1.01691	1.01656	0.98564	0.885699	0.890263	0.974818	0.954249	0.944523	0.929045	1.00112	0.964927	0.923297	1.00556	0.914739	0.837577	0.940856
348		2	617001..618000	1.00005	0.902214	0.841209	0.981419	0.987977	1.07453	1.08419	1.14001	1.03388	1.15713	0.918158	1.21498	1.0138	1.09801	1.03552	1.0637	0.912715	1.04296	0.962146	0.954459	0.952515	0.948193	1.04798	2.09206	1.95497	0.987997	0.92426	0.980993	0.947037	0.954999	0.908458	0.967492	1.04509	0.887668	0.971576	0.923942	0.942764	0.944923	0.982098	0.930346	0.925193	0.985439	1.0663	0.922096	1.2581	0.990127
349		2	618001..619000	0.840734	0.720664	0.754682	0.929551	0.903045	0.875381	0.785584	0.695394	0.983148	0.866338	0.789348	0.785871	0.900782	0.847173	0.935973	1.0148	1.03309	0.90055	0.844061	0.992929	0.827252	0.864459	0.792169	2.08629	2.04126	0.855534	0.817492	0.843137	0.814625	0.853764	0.819434	0.807836	0.821459	0.757994	0.787688	0.826867	0.840868	0.869966	0.886538	0.809575	0.846853	0.852112	0.993137	0.835803	1.00327	0.796877
350		2	619001..620000	0.985667	0.849044	0.842827	0.912189	0.833369	0.877804	0.956657	0.871006	0.912879	1.0044	0.806784	1.01267	0.944725	0.83772	0.840231	0.976276	0.911935	0.891313	0.819254	0.849907	0.87707	0.927473	1.01203	1.87698	1.89527	0.884213	0.771963	0.849428	0.876842	0.836406	0.874577	0.807371	0.90176	0.773049	0.824826	0.834519	0.825382	0.895249	0.860713	0.791306	0.806848	0.812222	0.838706	0.860492	0.990734	0.78657
351		2	620001..621000	1.11943	0.911988	1.04044	0.95279	0.991069	1.12775	1.02673	0.955956	0.98995	0.989873	0.976674	0.956888	1.08355	0.91156	1.02301	0.974357	1.00957	1.01874	1.06277	0.934636	0.928614	1.09421	1.09867	2.21212	1.9935	0.852451	0.892539	0.879857	0.948393	1.01237	0.997569	0.987381	1.04176	0.922987	1.00177	0.891739	0.962133	0.948369	0.967971	0.996111	0.990269	0.963463	0.908194	0.994402	1.07305	1.01579
352		2	621001..622000	1.0597	1.05096	1.06724	0.97361	1.06581	0.843322	0.931079	0.845394	1.03911	0.799524	1.0729	0.653681	0.933493	0.860976	1.05824	1.09891	1.0812	1.10663	1.09262	1.36787	1.10273	1.16552	1.04528	2.45959	2.48409	0.93931	1.10222	1.11332	0.992239	1.07663	1.00044	1.09396	1.00179	1.09777	1.09234	1.09506	1.13935	1.11905	1.07721	1.09274	1.05998	1.08699	1.0355	1.09309	1.26253	1.12674
353		2	622001..623000	0.986385	0.960372	0.988038	1.02555	0.868551	0.820396	0.903866	1.10089	0.924396	0.975324	0.854526	0.941607	0.869402	0.84977	0.813204	0.95256	0.923541	0.920567	0.883988	0.86973	0.90689	1.04382	0.946285	1.85391	1.78053	0.865543	0.830941	0.881649	0.905814	0.832424	0.843323	0.885032	0.847537	0.807456	0.913505	0.738535	0.785048	0.785613	0.893245	0.838716	0.835964	0.88796	0.810356	0.88153	1.11763	0.894785
354		2	623001..624000	1.0562	1.07261	1.03017	1.16307	0.944582	1.0306	0.946084	0.796484	1.00736	0.990863	1.01319	0.938901	0.985868	0.865085	1.09043	1.12034	0.993188	1.03044	1.02517	1.02376	1.09037	1.03726	0.986551	2.35381	2.11335	1.08583	1.05392	0.996141	1.05437	1.07344	1.03291	1.06508	0.958041	0.97233	0.958735	1.1289	1.09655	1.01991	0.97757	1.01634	1.00559	0.990749	1.04009	1.0669	0.981702	0.977953
355		2	624001..625000	1.04018	1.08254	1.09295	1.15414	1.05729	0.921629	0.899944	0.740765	1.05998	0.804136	0.980014	0.904775	0.893504	0.84746	1.02744	1.03432	1.00717	1.08669	0.981984	1.07364	1.09147	1.02796	1.01563	2.06021	1.88085	1.05234	0.933206	0.921644	0.949228	0.976708	1.03489	0.955845	0.929062	0.974828	1.06731	0.975968	1.04673	1.06652	0.998047	0.906029	1.03557	0.919768	1.03321	1.03153	0.810559	1.1273
356		2	625001..626000	1.26001	1.12147	1.11205	1.01328	1.06413	1.06123	1.12587	0.986068	1.0669	1.09407	1.13938	1.0554	1.13788	0.966021	1.02348	1.05559	1.10611	1.10477	1.07702	1.07017	1.06488	1.1143	1.1303	1.95147	1.78815	0.999984	0.998967	1.05196	0.988329	1.06929	1.03211	0.938506	1.02801	0.986968	1.12701	1.07798	0.955794	0.995469	0.978946	0.986502	0.994989	1.041	1.03299	1.05844	0.918556	1.0258
357		2	647001..648000	0.749818	0.725573	0.720044	0.799315	0.838311	0.882895	0.98518	0.934665	0.695408	1.12679	0.798024	0.992104	1.00995	0.902738	0.727943	0.751691	0.787791	0.890225	0.789628	0.669013	0.65803	0.721491	0.759846	0.820026	0.74542	0.856315	0.849271	0.830145	0.751503	0.821436	0.778499	0.711944	0.707072	0.63543	0.81282	0.805022	0.816959	0.855452	0.855489	0.798969	0.79609	0.858731	0.758468	0.808293	0.827849	0.777292
358		2	819001..820000	0.912922	0.745738	0.946074	1.00361	1.03856	1.15746	1.02226	1.10909	0.889709	1.00706	0.959358	1.01693	0.893366	1.00396	0.826942	1.01332	0.984043	1.04868	1.11702	0.912741	0.920348	1.00663	1.0813	0.967735	0.988165	0.933327	0.967605	1.04536	1.03874	0.9617	0.954717	1.07268	1.03993	0.937795	1.01955	0.914407	0.961781	1.00461	1.00484	0.9314	0.960408	1.02324	1.04442	0.984204	1.12237	0.992451
359		2	1088001..1089000	1.00772	0.891834	0.977211	0.756117	1.12289	0.965549	1.00447	1.09212	0.932801	1.01058	1.07132	1.02063	0.968521	0.992589	1.00979	1.03165	1.04284	1.1167	1.10859	1.10548	1.04786	0.895966	1.02841	1.06305	0.938983	1.02611	1.05859	1.05219	1.14579	1.05057	1.07101	0.977264	0.955397	1.05582	0.88404	1.08265	1.06391	0.934736	1.03658	1.02125	1.05746	0.966042	0.957263	1.0258	1.50799	1.107
360		2	1154001..1155000	1.03577	0.9223	1.05794	0.972084	1.10515	1.02372	1.05712	1.01555	1.04214	0.966606	1.06812	0.876431	0.949311	0.819733	1.00041	1.06793	1.00076	0.999222	1.02589	0.982702	1.03469	1.00668	1.07905	1.0034	1.07508	1.1038	1.06971	1.0214	1.01144	0.974763	0.988243	1.05397	1.04622	1.07901	0.9975	1.0901	1.04109	1.05735	0.990563	1.11588	1.04986	0.983884	1.10176	1.03264	0.665815	1.0642
361	clade I unique CNV	2	1239001..1240000	0.914655	0.886532	0.957499	0.867792	0.905918	0.976842	1.08594	1.00006	0.973331	1.11064	1.01111	1.04148	0.945396	1.00181	0.636121	0.629031	0.675791	0.586716	0.564335	0.592052	0.720188	0.563348	0.581875	0.60602	0.686228	0.640198	0.608274	0.619878	0.605238	0.579753	0.59591	0.611288	0.581455	0.634466	0.571652	0.538727	2.19998	2.16947	2.0903	2.13985	2.16797	2.14402	2.12715	2.07635	2.87743	2.12627
362	clade I unique CNV	2	1240001..1241000	0.595997	0.782248	0.731204	0.581554	0.67193	1.01741	1.06362	1.09799	1.05174	1.00778	1.05119	1.03649	1.07121	0.806032	0.73923	0.775604	0.736242	0.731527	0.702548	0.683066	0.682271	0.730408	0.59131	0.709493	0.727112	0.721915	0.701098	0.744095	0.701212	0.665832	0.654965	0.670509	0.658567	0.710297	0.571586	0.669877	2.9932	2.75521	3.00181	2.85625	2.96163	2.91005	2.71095	2.78595	3.99642	2.90637
363	clade I unique CNV	2	1241001..1242000	0.46588	0.437537	0.522788	0.470791	0.512567	0.974681	1.07175	1.06646	0.879756	1.13361	0.970319	1.1094	1.05618	0.921448	0.256789	0.232691	0.239982	0.228391	0.306741	0.254439	0.308245	0.135441	0.273546	0.216181	0.255284	0.280118	0.293551	0.258231	0.260492	0.264646	0.252951	0.221035	0.25125	0.281599	0.227601	0.200106	3.41127	3.23072	3.14248	3.18664	3.41173	3.55944	3.13105	3.23801	4.04421	3.49949
364	clade I unique CNV	2	1242001..1243000	0.98022	0.786236	0.896196	0.835169	1.02443	0.989176	1.02553	1.12086	0.816797	1.06329	1.01688	0.977552	1.07711	0.996624	0.220773	0.304609	0.286346	0.180471	0.308652	0.245799	0.312196	0.221133	0.256794	0.246207	0.268078	0.288007	0.326242	0.305422	0.305557	0.319006	0.287231	0.273908	0.341385	0.318606	0.264036	0.285316	2.31895	2.42298	2.37797	2.44126	2.45875	2.45637	2.28541	2.44477	3.18421	2.54498
365	clade I unique CNV	2	1243001..1244000	0.866059	0.776148	0.825125	0.809205	0.736663	0.962654	1.12878	1.06237	0.932801	1.02372	0.970514	1.09235	0.969103	0.949175	0.0878781	0.0997716	0.0964851	0.0890524	0.126159	0.0937474	0.102761	0.0932587	0.102806	0.104941	0.0764281	0.137645	0.140099	0.133162	0.13702	0.1244	0.136073	0.111565	0.126873	0.130501	0.122893	0.13234	3.33083	3.531	3.26487	3.43353	3.2852	3.27577	3.24217	3.38331	3.98452	3.49444
366	clade I unique CNV	2	1244001..1245000	1.35282	1.45627	1.30065	1.35143	1.30815	1.08493	1.13838	0.974413	1.01563	1.01825	1.03808	1.19074	1.22338	1.03903	0.00474921	0.00615932	0.0015799	0.00641722	0	0.00478249	0.00784108	0.00521789	0	0.00803893	0.00633974	0.00589198	0.00121294	0	0	0.000645276	0.000417074	0.00112922	0.00206579	0	0.00235275	0	2.98523	3.00185	2.88756	2.91314	2.97892	3.1021	2.91303	2.96931	2.22761	3.07388
367	clade I unique CNV	2	1245001..1246000	1.26814	1.37517	1.32201	1.14898	1.29763	1.02656	0.972345	0.931173	0.882238	0.970652	1.05194	1.15435	1.07639	0.874519	0.631514	0.655652	0.54152	0.524061	0.470562	0.637596	0.647454	0.662032	0.592276	0.604542	0.646846	0.56198	0.540738	0.525593	0.479752	0.621806	0.475322	0.4755	0.55303	0.538875	0.618136	0.63811	2.96486	2.90209	2.70583	2.74487	2.77915	2.80455	2.79682	2.70776	2.44073	2.69403
368		2	1275001..1276000	1.12936	1.18971	1.20971	1.21393	1.15853	1.10656	1.06466	1.06947	1.31745	1.0644	1.0696	1.12668	1.03663	1.06008	1.19087	1.24181	1.19835	1.21876	1.18482	1.33008	1.2539	1.20137	1.11387	1.1643	1.29279	1.09815	1.1151	1.09502	1.14716	1.11548	1.05269	1.0863	1.12288	1.0968	1.16685	1.11439	1.12055	1.13186	1.03332	1.09921	1.14456	1.20247	1.13419	1.07953	0.833516	1.14975
369		2	1283001..1284000	0.99974	0.994343	1.07447	1.01161	0.926897	0.860179	0.80421	0.776882	1.0586	0.844733	0.850805	0.91922	0.808279	0.755513	1.01066	1.06817	1.09962	1.09893	0.961615	1.16861	1.21538	1.06971	1.07657	1.05394	1.04225	0.970413	1.01411	0.99142	0.88869	0.945928	0.939277	1.01108	1.02731	1.04663	0.981185	1.00566	0.953877	0.97822	0.897174	0.963134	0.948643	0.883408	0.847774	0.906665	0.888075	0.872947
370		2	1329001..1330000	0.930486	1.05606	1.09247	0.877593	1.09073	1.03355	1.02247	1.07817	1.1005	1.1216	0.914079	1.08128	1.02556	1.01289	1.00335	1.06805	1.02053	0.905856	1.1001	0.982955	1.02146	1.09322	0.901658	0.986106	0.95204	0.940537	1.09424	1.02569	0.974918	1.02791	0.972083	1.03889	1.02627	1.00293	1.07712	0.968485	0.998828	1.00943	0.998297	0	1.06021	0.962594	0.962879	1.00195	1.26891	1.04415
371		2	1426001..1427000	1.12431	1.12095	1.11644	1.13831	1.14333	0.999865	1.04375	1.03955	1.02385	0.978327	1.0221	1.03443	0.985365	0.996281	1.15702	1.11865	0.983	1.0958	1.06275	1.0449	1.07233	1.04713	0.98257	1.06521	1.08411	1.05781	1.11688	1.03143	0.969584	1.12692	0.939073	1.06059	1.06064	1.10015	1.03138	1.12772	1.16235	1.14195	1.0387	1.068	1.13006	0.967525	1.11972	0.970011	0.977641	0.991039
372		2	1430001..1431000	1.02346	1.00703	1.06988	1.07777	1.15763	1.04031	1.07809	0.996279	1.09838	0.929341	1.0694	1.10153	1.07827	1.02735	1.03063	1.01148	1.05919	1.08642	1.0702	1.01835	1.02509	1.07154	1.06226	1.07548	1.04499	1.19968	1.23815	1.10768	1.08514	1.10715	0.908972	1.1166	1.22058	1.12171	1.11767	1.04394	1.15773	0.975275	1.03503	1.08778	1.0413	1.15212	1.12101	1.10757	1.08954	1.06617
373		2	1484001..1485000	0.949808	1.04056	1.08978	1.0416	1.0059	0.901099	0.736557	0.717398	1.01245	0.773563	0.938558	0.737243	0.901738	0.853657	1.27011	1.1541	1.13994	0.994	1.02236	1.12133	1.09171	1.07644	1.0249	1.09552	1.2025	1.06806	1.0459	0.958906	0.995668	1.12425	0.912806	0.882346	0.949803	1.05848	1.02608	1.06377	1.03757	1.05637	0.880663	0.958785	1.0241	0.987137	0.961336	0.976037	0.928555	0.991406
374		2	1584001..1585000	0.940747	1.06551	1.1595	1.05342	0.965272	1.00335	0.970468	0.993237	0.998307	0.967346	1.02833	0.9254	0.855665	0.90322	0.914098	1.10711	1.14626	1.057	1.05558	1.00941	0.81501	0.947538	0.947622	1.15178	0.950592	0.973384	1.04774	1.07404	1.05688	1.04553	1.09723	1.02894	1.05172	1.06458	1.20364	1.00975	1.1177	1.05062	0.946441	0.949261	1.03798	1.01006	1.00686	1.05998	0.780561	0.995956
375		2	1641001..1642000	0.903688	0.872883	0.901776	0.836606	0.808002	1.0237	1.01376	1.01169	0.799743	1.14404	0.886295	1.07066	1.03553	0.922599	0.868584	0.820487	0.882109	0.857207	0.93885	0.830356	0.829391	0.830555	0.959213	0.811923	0.855206	0.90481	0.822305	0.880407	0.840315	0.832258	0.751629	0.827734	0.863147	0.785189	0.884128	0.873858	0.887736	0.856273	0.88194	0.891254	0.894417	0.879285	0.951292	0.823529	1.53004	0.91943
376		2	1644001..1645000	1.06516	0.978593	1.03033	1.06106	0.988742	1.03856	0.957892	1.15233	1.00461	1.17659	0.972214	1.08949	0.976203	0.948044	0.979036	0.96674	1.10042	1.03902	1.02342	0.93842	1.05075	1.13572	0.949661	0.944054	1.00816	1.00199	1.07122	1.01245	0.943854	1.04702	0.949615	0.979641	1.01795	0.967803	0.948884	0.926549	1.0255	1.06054	1.15476	1.09024	1.05369	1.0368	1.00106	0.991673	0.709157	1.01475
377		2	1645001..1646000	0.907265	0.894474	0.853349	0.987455	0.925703	1.07011	0.953377	1.06608	0.976797	0.977337	0.984865	1.05187	1.01575	1.11711	0.904185	0.900662	0.999943	0.951565	1.03531	0.89934	0.988839	1.0286	0.985107	0.915269	1.03188	1.11241	1.01539	0.931237	0.995442	1.00525	0.967203	1.00936	1.10717	1.00868	0.988617	0.961854	0.962828	1.0262	1.07924	1.06736	0.980607	1.05465	1.00343	1.03332	1.00613	1.04823
378		2	1730001..1731000	1.05012	1.08839	1.10938	1.12074	1.03175	1.04777	1.15448	1.33789	1.04529	1.14991	1.10069	0.998294	1.16082	1.04725	1.14476	1.15221	1.15983	1.27471	1.11949	1.21407	1.25578	1.11292	1.14072	1.06121	1.08087	1.07058	1.03783	1.15806	1.02453	1.07589	1.08664	1.1301	1.08196	1.06747	1.07925	1.10714	1.15648	1.07393	1.12967	1.07668	1.01256	1.15491	1.00563	1.18691	0.987466	1.02353
379		2	1741001..1742000	1.05481	1.07581	0.946505	1.0322	1.00079	0.986945	1.09259	1.12335	1.00871	1.0808	1.01317	1.06386	1.01337	0.96386	0.931875	1.09358	0.995811	0.984213	1.02111	1.08791	1.09554	1.03964	1.07601	0.93548	0.996849	1.17327	1.12709	1.05957	1.054	1.09811	0.88866	1.08803	1.05613	0.989568	1.0568	1.00257	1.02085	0.996321	1.10736	1.12176	1.10055	1.01573	1.03337	1.01252	1.19425	1.10473
380		2	1742001..1743000	1.23665	1.16105	1.00532	1.00632	1.05863	1.04957	1.04173	1.34772	0.997767	1.08311	1.02012	1.0613	1.11394	1.04812	1.03032	1.10485	1.08268	0.951804	1.08789	0.879958	1.09352	1.1056	1.11872	1.12437	1.09845	1.13158	1.14085	1.00899	1.03362	1.16221	0.889583	1.04351	1.06947	1.05411	1.07892	1.07681	1.0247	1.03341	1.09865	1.05074	1.03908	1.08632	1.1177	1.02452	1.17135	1.07163
381		2	1812001..1813000	0.984033	0.978492	0.910612	0.904201	0.944839	1.02254	0.951925	1.137	0.866184	1.00343	0.930045	0.966427	1.05811	0.930836	0.995249	0.905175	0.99726	1.01607	1.05653	0.883878	1.03365	0.987275	1.03146	0.912741	0.851439	1.05381	0.974912	0.980105	0.975272	1.08134	0.870557	0.986807	1.05458	0.922041	1.03169	0.968514	0.99379	1.01487	1.01746	1.03054	1.07417	1.09327	1.09072	1.04663	1.1866	0.93408
382		2	1813001..1814000	1.0047	0.884858	0.898707	0.851084	0.945847	1.00669	1.10762	1.31953	1.01681	1.12716	0.980158	1.0626	1.0126	0.93706	1.08933	0.877491	1.00859	0.976684	1.03198	1.08703	0.930049	0.928496	0.985019	0.989922	0.855601	0.951439	1.15001	0.995191	0.964799	0.958723	0.977541	1.00388	1.03067	1.0035	0.910294	0.840417	1.05115	0.94287	0.991465	1.046	1.03251	1.00202	1.03537	0.993284	0.963329	0.982011
383		2	1814001..1815000	0.966927	0.880027	0.983566	0.929729	0.990304	1.15224	0.975625	1.31541	0.987427	1.02659	1.06767	0.948255	1.02767	1.06521	0.887498	0.87656	0.953448	0.993701	1.02547	1.06869	0.882626	0.970838	0.99701	0.940564	0.851158	1.03168	1.09124	1.06992	0.980921	0.956474	0.992982	0.98403	1.06282	0.987002	0.910119	0.988358	1.10275	1.02287	1.02973	1.13936	1.08798	1.03589	0.954851	1.05932	1.03767	1.00208
384		2	1820001..1821000	0.94581	0.93832	1.02971	0.93185	1.00063	0.931338	1.05387	1.17927	0.89423	1.02609	1.03422	1.07288	1.074	0.981021	1.03675	0.960995	0.848192	0.93174	0.9903	0.889817	0.929052	0.996065	0.91643	0.950044	1.00757	1.04989	1.0064	1.01683	0.995471	1.12529	0.945355	1.04625	1.0801	0.910268	0.942705	0.917955	1.02875	1.06373	1.02301	1.02647	1.03714	0.957509	1.05172	0.943283	1.63077	0.971177
385		2	1894001..1895000	0.788833	0.931355	0.979957	0.998692	0.988648	0.867666	1.03588	0.77098	1.00625	0.88018	0.918974	0.962027	0.916748	0.893035	0.88507	0.981419	0.935907	0.95944	0.975738	0.925207	1.0018	0.987027	0.884652	0.980442	0.973413	0.947768	0.862953	0.957557	0.905107	0.947348	0.868259	0.94601	0.89087	0.888853	0.854708	0.90056	0.933216	0.857876	0.895263	0.967473	0.903445	1.00495	0.946008	0.952456	0.724977	0.922424
386		2	1910001..1911000	0.507644	0.527834	0.576069	0.611343	0.60369	0.672863	0.561678	0.599127	0.758931	1.50588	0.688663	0.568201	0.764612	0.586795	0.924899	0.885108	0.90203	0.885338	0.944564	0.921844	0.78384	0.828973	0.898068	0.874232	0.910182	0.94291	0.905901	0.865543	0.929157	1.02624	0.769927	0.844918	1.44271	1.52006	1.51803	1.61353	0.852636	0.916846	0.769824	0.824264	0.843623	0.775268	0.83444	0.758069	0.721747	0.785855
387	TWCC58362 unique CNV	2	1911001..1912000	1.11706	1.12698	1.1636	1.04505	1.10961	1.04673	1.00985	1.08426	1.07713	2.97582	1.06591	1.04982	1.05632	0.780262	1.11143	0.9636	1.23406	1.18852	1.15501	1.14597	1.15152	1.19716	1.08633	1.13322	1.29089	1.17706	1.09214	1.10178	1.14698	1.19245	1.01272	1.11757	2.23925	2.24942	2.0596	2.34409	1.14261	1.17367	1.10408	1.18138	1.08916	1.13619	1.2287	1.0987	1.03288	1.05645
388	TWCC58362 unique CNV	2	1912001..1913000	1.09813	1.11605	1.03981	1.08917	1.04048	0.998456	1.07894	1.0672	1.04407	3.14338	1.03516	0.926228	0.894835	0.882729	1.19616	1.0953	1.11619	1.04942	1.15044	0.955164	0.985933	1.03888	0.947924	1.10449	1.18862	1.08636	1.00832	1.1172	1.0319	1.04581	1.03407	1.04811	2.03782	2.09189	1.82349	2.08184	1.08983	1.03586	0.981241	1.08068	1.06414	1.08815	0.962107	0.997754	1.21858	1.01877
389	TWCC58362 unique CNV	2	1913001..1914000	1.1466	1.04629	1.19013	1.07341	1.04079	1.10555	1.00254	1.23771	1.01422	3.34827	1.03375	1.14832	1.27594	0.988238	1.12659	1.06557	1.16538	1.05507	1.1306	1.15129	1.01732	1.21274	1.00443	1.08951	1.08018	1.0284	1.1006	1.11389	1.10573	1.11268	1.01139	1.07645	2.02182	2.1386	1.92958	1.96692	1.00701	1.09787	1.05805	1.11934	1.02585	1.10399	0.954862	1.0228	1.33171	1.06001
390	TWCC58362 unique CNV	2	1914001..1915000	0.901435	1.08124	0.992343	1.02684	0.952998	1.00636	1.16002	1.1038	0.930803	3.21151	1.08173	0.995832	1.01878	1.03282	1.04307	0.953933	1.00796	0.930617	1.05586	0.98594	0.989495	0.98145	1.09427	0.915188	0.892032	1.0227	1.07215	1.04831	1.04559	1.00357	0.93019	1.01223	2.09881	1.98411	1.7714	2.05565	0.999709	0.99007	1.08277	1.07991	0.999568	0.999312	0.987864	1.12539	0.935846	0.981787
391	TWCC58362 unique CNV	2	1915001..1916000	0.958992	1.07103	1.13917	1.04528	1.08914	0.83119	1.06432	1.07339	1.1076	2.84393	1.00428	0.931562	0.980069	0.922803	1.06196	1.12914	1.02451	1.10246	1.03572	1.09804	0.966689	1.00239	1.11632	0.940782	1.11555	1.06604	1.04282	1.00038	1.0373	1.02433	0.95596	0.996297	2.09382	2.00842	1.95755	1.94599	0.982814	0.988447	0.999859	1.03924	1.04255	0.998852	1.03128	1.02417	1.38389	0.945361
392	TWCC58362 unique CNV	2	1916001..1917000	1.20442	1.13094	1.09598	1.30202	1.35164	0.937435	0.853729	0.911715	1.1288	2.63416	1.00679	0.868654	0.953058	0.902423	1.02492	1.24809	1.11519	1.15619	1.0483	1.09222	1.22265	0.977487	1.07866	1.15194	1.16433	1.07156	1.10977	1.10167	1.10617	1.07925	0.92995	1.0307	2.11432	2.02416	1.94364	2.073	0.964765	1.06375	1.0042	1.02114	1.0964	1.1146	1.06357	1.03075	1.45862	0.974377
393	TWCC58362 unique CNV	2	1917001..1918000	0.988712	1.2038	1.02803	0.976574	0.985502	1.03336	1.06161	1.09133	1.01949	3.08222	1.09446	0.995647	1.00703	0.905771	1.13776	1.08934	1.09371	1.02659	1.10331	1.04765	1.00796	1.17185	1.1476	1.00108	1.10322	1.08877	1.10165	1.09	1.00335	1.13689	1.0084	1.08419	2.17626	2.05836	1.9623	2.1441	1.08944	1.13464	1.07415	1.07994	1.04156	1.13896	1.10943	0.966249	1.09618	1.11207
394	TWCC58362 unique CNV	2	1918001..1919000	1.02145	1.04012	1.12705	1.10636	1.09792	1.10392	1.08333	1.08781	1.07286	3.36367	1.09734	1.15226	1.13563	1.0049	1.15095	1.14866	1.09425	1.20565	1.08379	1.06475	1.10273	1.16132	1.16335	1.07945	1.12714	1.03287	1.04529	1.11566	1.09769	1.12832	0.956563	1.06525	2.17655	2.12254	2.06903	2.15517	1.11226	1.1423	1.02374	1.14027	1.13577	1.06519	1.094	1.01367	1.25315	1.15628
395	TWCC58362 unique CNV	2	1919001..1920000	1.20679	1.09553	1.15591	1.23953	1.14761	1.13164	1.07693	1.17892	1.06185	3.07216	1.07592	1.08183	1.02677	0.972125	1.036	1.23345	1.04771	1.31822	1.0389	1.07472	0.964209	1.09301	1.07008	1.05744	0.983054	1.03661	1.0834	1.10255	1.0926	1.11135	0.966502	1.14834	2.20433	2.18672	1.96529	2.05271	1.15069	1.06948	1.07851	1.11251	1.05753	1.00341	1.10421	1.03546	1.3184	1.12674
396	TWCC58362 unique CNV	2	1920001..1921000	0.799131	0.765644	0.705579	0.756999	0.844276	0.728715	0.657396	0.693559	0.685608	2.05602	0.630894	0.770443	0.817835	0.668176	0.723171	0.699228	0.671173	0.65237	0.7083	0.749558	0.606595	0.67628	0.735259	0.709683	0.668579	0.712514	0.746753	0.735718	0.755276	0.820864	0.594366	0.704986	1.33454	1.37504	1.32044	1.49932	0.788765	0.773793	0.687499	0.786197	0.759244	0.778481	0.802907	0.706941	1.00085	0.7084
397	TWCC58362 unique CNV	2	1921001..1922000	1.03845	1.20043	1.12055	1.05264	1.08248	1.05998	1.01495	1.04465	1.07202	3.00849	1.03246	1.05044	1.09002	0.912191	1.06929	1.11962	1.09868	1.09595	1.01296	1.15848	1.038	0.975345	1.03077	1.17597	1.12882	1.0969	1.17616	1.06897	1.02327	1.07719	0.98803	1.0412	2.2311	2.20322	1.99029	2.17806	1.16144	1.04404	1.10076	1.13279	1.12683	1.10294	1.1396	1.12635	1.43957	1.07178
398	TWCC58362 unique CNV	2	1922001..1923000	1.08453	1.17737	1.14255	1.08797	1.15408	1.06768	1.08012	1.04811	1.19269	3.11474	1.00917	1.01993	0.936283	1.03396	1.17032	1.15427	1.01183	1.24934	1.11462	1.24694	1.07119	1.05875	1.14979	1.21616	1.109	1.17088	1.04596	1.10106	1.17961	1.09586	0.874666	1.10935	2.09716	1.98642	2.06642	2.16839	1.18474	1.06293	1.08335	1.03102	1.06019	1.11165	1.07035	0.950491	1.1343	1.08232
399	TWCC58362 unique CNV	2	1923001..1924000	1.13424	1.14605	1.17086	1.14784	1.20514	1.1441	1.12271	1.11053	1.12009	3.36193	1.04544	1.13588	1.13265	1.08533	1.09431	1.14137	1.00366	1.13732	1.09692	1.12996	1.02565	1.10715	1.16974	1.10629	1.12234	1.09878	1.15422	1.18116	1.05618	1.1531	1.07553	1.16456	2.30733	2.1277	2.15952	2.08972	1.09146	1.05958	1.09786	1.11159	1.10714	1.13524	1.10364	1.0628	1.09067	1.16448
400	TWCC58362 unique CNV	2	1924001..1925000	0.652292	0.696297	0.767392	0.707678	0.673132	0.81024	0.843473	0.799505	0.64071	2.35927	0.68896	0.80746	0.763182	0.742109	0.696618	0.793866	0.716656	0.794337	0.641673	0.711971	0.788946	0.730648	0.774422	0.7661	0.656927	0.760806	0.698866	0.712175	0.6661	0.692768	0.6372	0.712727	1.33834	1.36158	1.33093	1.37706	0.682222	0.607721	0.720575	0.695839	0.666573	0.646473	0.655539	0.719653	0.570892	0.708775
401		2	1926001..1927000	0.993391	1.10299	0.978682	0.968695	0.986954	0.95395	1.03977	1.05059	0.94219	1.01235	1.06608	1.06896	1.0007	0.929881	1.02234	1.12587	1.05696	0.992602	1.01546	1.0336	1.17327	1.02303	1.0677	0.991834	1.05024	1.09052	1.14342	1.0538	1.06243	1.01647	0.944361	1.08033	2.06144	2.13744	1.88534	2.10302	1.07584	1.05931	1.1078	1.02703	1.14176	1.02672	1.02158	1.11156	1.22883	1.0869
402		2	1927001..1928000	0.985023	0.923087	0.975632	0.980993	0.984417	1.12661	1.141	1.00786	0.897889	1.0829	0.962069	1.07591	1.07958	1.07444	0.957386	0.95934	0.888986	0.94234	0.898261	1.05456	0.964586	0.964502	0.960969	0.919973	0.925171	0.980209	1.02201	1.02849	1.01742	1.01833	0.894783	0.975752	1.97819	1.91077	1.77813	1.79999	1.01812	0.955311	0.96864	0.965565	1.0235	0.918489	0.95245	1.02295	1.01454	0.974136
403		2	1928001..1929000	1.00147	0.924637	0.95947	0.865939	0.959042	0.940934	0.983135	1.08164	1.09039	1.0773	0.990176	1.07546	1.04119	0.947264	0.900999	1.03261	1.07477	0.917161	1.0149	0.982913	1.04123	0.959819	1.03453	0.844233	0.856655	0.971893	1.03363	1.05708	1.04577	1.05107	0.922949	1.06303	1.93886	1.93777	1.90936	1.90153	1.00668	0.956333	0.996162	1.09061	1.01976	0.965602	1.06596	1.05471	0.886064	0.982976
404		2	1929001..1930000	1.03374	1.03281	1.00463	1.05547	1.01955	1.04852	0.999542	1.01322	1.09237	0.959523	1.02828	0.982254	0.973077	0.939992	0.987338	0.961098	1.1119	1.02199	1.12395	0.944138	1.07984	1.1067	1.10658	0.986206	0.9941	1.0839	1.05456	1.06083	1.09404	1.00419	1.02151	0.984922	2.01646	1.96783	1.8428	2.04092	0.991609	0.993426	1.0557	1.05369	1.09043	1.09397	1.0284	1.03904	0.99495	1.00422
405		2	1930001..1931000	0.834644	0.971583	0.957548	1.02217	1.11378	1.08163	1.05921	1.0259	1.10014	1.0688	1.00433	1.08354	1.01197	1.00847	0.948006	1.05856	1.09877	0.963969	1.09193	0.875543	1.03368	1.02002	1.10929	0.990103	1.07717	1.11749	1.06157	1.02154	1.01656	0.980994	1.02888	0.959251	2.02302	1.98916	1.81401	2.05043	0.957731	1.03906	1.0879	1.03431	1.02928	1.06856	1.14157	1.0372	1.14116	1.02914
406		2	1931001..1932000	0.810742	0.73101	0.815897	0.785897	0.863827	0.748274	0.739536	0.774842	0.803652	0.823431	0.791413	0.859008	0.73123	0.84657	0.788913	0.857255	0.894131	0.806036	0.813661	0.84196	0.812919	0.869182	0.848621	0.814089	0.803039	0.837868	0.872462	0.813374	0.749666	0.778728	0.832559	0.773777	1.67483	1.52661	1.41746	1.76637	0.844331	0.767362	0.874546	0.890475	0.782734	0.790891	0.83623	0.849698	0.925731	0.813593
407		2	1932001..1933000	0.736363	0.794526	0.842277	0.652053	0.700232	1.079	0.965853	0.906987	0.705233	0.993058	0.815246	1.01685	1.02187	0.846319	0.70203	0.792512	0.882616	0.750552	0.758221	0.718761	0.765253	0.68809	0.753602	0.792927	0.693964	0.877013	0.846263	0.814403	0.809761	0.809803	0.7647	0.812016	1.60637	1.40879	1.55222	1.62507	0.905609	0.767302	0.806606	0.829401	0.756809	0.79397	0.887368	0.844064	0.69438	0.841741
408		2	1934001..1935000	0.9126	0.958945	1.05442	0.768643	0.863749	0.870308	0.964251	1.03444	1.02417	0.960149	0.991637	0.983198	0.938404	0.825447	0.737714	0.879635	0.887001	0.828001	0.970555	0.911081	0.783026	0.98678	0.970218	0.855489	0.931493	0.968952	0.895421	0.850999	0.925561	0.90688	0.824475	0.919646	1.76687	1.76899	1.79882	1.88691	0.788257	0.849542	0.852953	0.919883	0.79458	0.822463	0.844923	0.860883	0.964992	0.765099
409		2	1935001..1936000	1.06465	1.1838	1.277	1.25825	1.15155	1.11956	1.10032	1.01042	1.19879	0.947667	1.19522	1.03919	1.08076	1.10845	1.09579	1.26481	1.19602	1.1207	1.07895	1.21825	1.06039	1.07621	1.08489	1.2679	1.15542	1.20406	1.14857	1.15056	1.22065	1.07661	1.05115	1.03996	2.10977	2.21141	2.27526	2.1596	1.06877	1.13655	1.14281	1.1297	1.01763	1.12552	1.11305	1.11562	0.975784	1.07233
410		2	1936001..1937000	1.18493	1.03444	1.1356	1.24898	1.12933	1.05705	1.0698	1.08748	1.1079	1.18972	1.12865	0.956859	1.21597	0.949389	1.12979	1.07808	1.19983	1.18082	1.0574	1.17184	1.17014	1.05679	1.09583	1.15542	1.06133	1.15823	1.14883	1.11028	1.10824	1.15601	1.02757	1.01695	2.23564	2.21217	2.07537	2.09899	1.08323	1.1826	1.12658	1.13487	1.13533	1.14398	1.06338	1.05928	1.14946	1.10726
411		2	1937001..1938000	1.25836	1.1564	1.14906	1.31276	1.16394	1.03621	1.06705	1.02984	1.2483	1.01639	1.08092	0.97617	1.02872	1.01551	1.08399	1.16796	1.31765	1.20791	1.17228	1.20034	1.27726	1.25074	1.15421	1.25605	1.29613	1.15175	1.09767	1.23465	1.03342	1.14993	1.16491	1.19544	2.2589	2.34205	2.2867	2.32763	1.25767	1.18842	1.16589	1.15549	1.09367	1.20427	1.20392	1.10601	0.91548	1.11063
412		2	1938001..1939000	1.15403	1.18982	1.19231	1.17534	0.981871	1.01854	1.14854	1.15955	1.08089	1.05453	1.02782	1.12922	1.09263	1.01883	0.989967	1.09811	1.17488	1.08199	1.14588	1.21002	1.06213	1.18025	1.01248	1.17977	1.15487	1.2019	1.0562	1.16059	1.06036	1.07459	1.10718	1.20747	2.20379	2.14564	2.06195	2.20329	1.16883	1.12162	1.10221	1.1357	1.12042	1.07426	1.12159	1.10328	0.893471	1.02711
413		2	1939001..1940000	1.02519	0.981829	0.990136	0.986335	1.02486	1.06893	1.07448	1.04138	1.05735	1.08227	1.03936	1.11045	1.21007	0.987997	1.17745	1.19151	1.07806	1.14472	1.1315	1.12029	1.15114	1.07323	1.10366	1.04593	1.04399	1.03944	1.03387	1.03345	1.01157	1.16159	1.0495	1.11067	2.09934	2.13539	2.11149	2.19872	1.11691	1.11333	1.12759	1.02927	1.13515	1.02329	1.04825	1.01105	0.860225	1.09706
414		2	1940001..1941000	1.04904	1.07702	1.04014	1.03695	1.07556	1.00993	0.989236	1.15032	1.07487	1.0523	1.10701	1.04679	1.04674	0.905595	1.08421	1.19745	1.16469	1.07917	1.10625	1.12909	1.09571	0.979013	1.15174	1.09962	0.963087	1.06747	1.07633	1.01961	1.07489	1.17395	1.08279	1.07167	2.12763	2.05021	1.97569	2.15503	1.00685	1.03796	1.07654	1.10955	0.979983	1.11658	1.06262	1.00255	1.17658	1.04611
415		2	1941001..1942000	1.033	1.07069	1.30448	1.13227	1.1126	1.15478	1.1207	1.11274	1.19298	1.07433	1.06871	1.01138	1.0105	0.922756	1.04241	1.12506	1.22018	1.10989	1.05748	1.14077	1.09198	1.0403	1.15922	1.08532	1.06738	1.02976	1.12788	1.04599	1.14611	0.983981	1.09708	1.02791	2.05465	2.06614	1.98519	2.15643	1.04374	1.08355	1.13553	1.1912	1.05562	0.968323	0.99004	1.09989	0.85626	1.01479
416		2	1942001..1943000	1.13921	1.22017	1.19451	1.24413	1.11222	1.07752	1.14106	1.01505	1.18494	1.08211	1.05094	1.0497	1.15729	1.16864	1.06402	1.17869	1.18363	1.04662	1.10137	1.18448	1.25306	1.10116	1.23813	1.04977	1.19347	1.0858	1.07792	1.142	1.09265	1.13717	1.1658	1.17296	2.23596	2.20321	2.02873	2.37639	1.07835	1.07571	1.04437	1.17215	1.0976	1.05705	1.03821	1.08224	0.718769	1.09076
417		2	1943001..1944000	1.03359	1.11067	1.07486	1.12475	1.05427	1.13189	1.07882	1.14892	1.04993	1.05786	1.09006	1.09934	1.06871	1.09006	1.06359	1.03264	1.14487	0.912213	1.11875	0.962679	1.11758	1.09051	1.04139	1.08207	0.971587	0.937079	1.03098	1.10057	1.06269	1.08366	1.18292	1.0781	2.03339	2.13669	1.84418	2.11869	1.03189	0.994317	1.02953	0.99858	1.07569	1.07723	1.02106	1.09022	0.80845	1.0698
418		2	1944001..1945000	0.96705	1.11714	1.01788	1.03269	0.919293	0.931321	0.921374	1.23042	0.982543	1.05333	0.999106	1.17024	1.19619	0.952895	0.900301	1.03943	0.980468	1.21822	0.961037	1.03054	1.05744	0.985589	1.06738	1.03606	1.01205	0.906757	0.960182	0.879298	0.95134	0.886701	1.00995	1.07719	2.01762	1.87157	1.64514	1.79414	0.900591	0.945224	0.940199	0.91917	1.07122	0.974871	0.98408	0.930329	1.50061	0.980598
419		2	1945001..1946000	1.18923	1.16297	0.905209	0.964632	0.975188	0.956391	1.05154	1.05054	1.08914	1.00602	1.07382	1.06569	1.18898	1.0089	0.976821	1.14245	0.97822	1.07481	1.01668	0.970941	1.01412	1.00895	1.08204	1.05783	1.08071	1.00119	0.976484	0.981419	0.996994	0.910908	1.08786	1.07017	1.96609	1.97008	1.85084	2.0252	0.961292	1.02025	1.0281	1.01995	1.00625	1.0301	1.06737	0.921864	1.06411	1.06848
420		2	1946001..1947000	1.02667	0.934557	1.05408	1.00966	1.00878	0.999611	1.07986	1.17869	1.10778	1.21919	1.12768	1.03065	1.11282	0.946522	1.04558	1.14856	0.978027	1.14752	1.03059	1.04601	0.99713	1.15219	1.13738	1.09802	1.13091	1.06899	1.02281	1.06298	1.04816	1.04378	1.15808	1.1212	1.94682	1.99881	1.97915	2.03197	1.08092	1.07593	1.06632	1.08111	0.979369	1.03992	0.998389	1.043	1.35774	1.09616
421		2	1947001..1948000	1.01504	1.13126	1.16589	1.08768	1.0184	1.10661	1.10858	1.02287	1.00586	0.952043	1.12215	1.03604	0.938986	0.884473	1.08786	1.1016	1.31678	1.27068	1.10402	1.13033	1.11355	1.04176	1.16819	1.20487	1.11404	1.08586	1.09482	1.10194	1.04403	1.13551	1.13444	1.01987	2.13679	2.20283	2.10712	2.2644	1.1169	1.07629	1.0473	1.11612	0.99516	1.13256	0.987435	1.10748	1.32937	1.12972
422		2	1948001..1949000	1.12249	1.0049	1.14656	0.977119	0.999907	1.09747	1.00542	1.13162	1.01152	1.03912	0.977762	1.04493	1.08349	0.897784	0.99198	1.13644	1.17954	1.15046	1.17701	1.04826	1.14987	0.961985	1.15182	0.962642	1.02079	1.08254	1.08259	1.02376	1.115	1.1425	1.10529	1.04456	2.11467	2.11982	1.78855	2.06033	1.01133	1.06473	1.05898	1.068	1.12529	1.03043	1.00986	1.15735	1.1125	1.05222
423		2	1950001..1951000	1.08877	0.896137	1.01188	0.976365	1.04893	1.13204	0.884347	1.09932	0.930698	1.09424	1.02588	0.914226	1.0639	1.02281	1.02637	0.953199	0.994687	1.00964	1.10361	0.844231	0.93958	0.93365	1.06424	0.984439	0.871161	0.995218	1.03339	1.07395	0.983092	1.11017	1.03605	1.0885	1.90855	2.00969	1.79178	2.13398	1.13343	1.09276	1.02422	1.05052	1.0758	1.0641	1.03973	0.993824	0.809147	1.10753
424		2	1951001..1952000	1.29743	1.24135	1.12219	1.28865	1.18356	0.989569	0.91827	1.15064	1.09564	1.06576	1.08077	1.09847	0.934587	1.00095	1.30379	1.19504	1.108	1.16974	1.13243	1.20316	1.17463	1.13813	1.18453	1.06012	1.05803	1.18162	1.12587	1.16464	1.15089	1.18162	1.14207	1.13779	2.32294	2.41974	1.98148	2.4089	1.15781	1.26659	1.1729	1.22901	1.20975	1.16494	1.1825	1.09794	0.932442	1.12654
425		2	1952001..1953000	1.23006	1.21144	1.21196	1.11018	1.05536	1.00426	1.14333	1.23117	1.16284	1.0857	1.1793	1.022	1.07406	0.92412	1.13481	1.24702	1.1857	1.30341	1.08704	1.11878	1.18561	1.12238	1.14875	1.17629	1.15328	1.22942	1.19422	1.13409	1.17615	1.14195	1.23146	1.15901	2.14281	2.25334	1.96529	2.28857	1.15029	1.1195	1.17834	1.08759	1.13968	1.11411	1.13101	1.22062	0.822337	1.1697
426		2	1953001..1954000	1.04218	0.939567	0.966247	0.947726	1.01199	1.07534	1.03357	1.14594	1.07764	1.0317	1.14548	1.13622	1.07484	0.927441	1.00442	1.05561	1.01708	1.09096	1.02468	1.11014	1.13373	0.995378	1.03244	1.06645	0.979603	1.12381	1.02038	1.0887	1.15356	1.09607	1.06291	1.14412	2.14054	2.1603	1.95632	2.32486	1.09184	1.06576	1.15175	1.15493	1.08757	1.08414	0.924293	1.08422	0.685639	1.1198
427		2	1954001..1955000	0.977881	1.04522	0.938964	1.001	1.03629	1.10943	1.05395	1.16118	1.14075	1.17332	1.01721	1.07864	1.07404	1.0907	0.995379	0.966787	1.16232	1.10956	1.08017	1.02888	1.15022	1.12231	1.04014	1.08738	1.0325	1.09305	1.03006	1.09006	1.05934	1.08102	1.00775	0.959205	2.07476	2.04783	1.95379	2.19128	1.15329	0.980494	1.08145	1.04246	1.09825	1.02735	1.09674	1.08575	1.17592	1.05533
428	JCM15448 unique CNV	2	1966001..1967000	0.975542	1.06609	0.836129	0.922118	0.922791	1.19786	1.11414	3.23699	0.812001	1.08133	0.724476	1.03771	1.08571	1.03626	0.928038	0.911165	0.915915	0.894491	0.724605	0.888535	0.90255	0.977575	0.931367	0.925103	0.899329	0.697739	0.755438	0.716249	0.759569	0.70359	0.795058	0.781582	0.73263	0.785632	0.836985	0.740696	0.729512	0.72488	0.751678	0.810486	0.716935	0.741834	0.700653	0.74518	0.723062	0.715694
429		2	1975001..1976000	0.909728	1.05157	1.06429	1.01116	1.11778	0.952262	0.939591	1.00536	0.852902	0.801591	0.788499	0.681762	0.962486	0.843082	0.922152	0.856033	0.83769	0.859788	1.02604	0.927457	0.890564	0.829684	1.059	0.988698	0.867385	1.17103	1.13547	1.02443	1.0459	1.06725	0.91183	0.975916	1.0899	1.07182	0.977271	1.01292	1.00801	1.03537	0.995511	1.09991	1.08424	1.02937	1.0509	1.04968	1.71496	0.95691
430		2	2028001..2029000	1.00365	0.999612	0.950566	1.00701	0.941092	0.994599	1.0556	1.17405	1.0268	1.06539	0.981466	0.97545	1.08371	0.936022	0.884821	0.951488	1.02737	0.944072	1.04514	0.930684	0.990504	0.997551	1.08383	1.01953	0.978348	1.10633	1.01805	1.01728	1.05174	1.08703	0.948364	1.06506	1.0203	0.994512	1.04286	0.914199	1.02923	0.956743	1.03545	1.0419	1.15945	1.07471	1.08825	0.941505	1.4409	1.03109
431		2	2029001..2030000	1.00381	0.951969	0.926136	0.970994	0.938312	1.08205	0.96713	1.15919	0.867844	1.01328	0.957268	1.10077	1.04256	1.04903	0.912819	0.958418	0.961884	1.02495	0.966658	0.933196	0.950983	0.860919	0.88434	0.997562	0.902078	0.980361	0.992174	1.04491	1.07105	1.00422	0.894721	1.11299	1.05707	0.972245	0.930876	1.00684	1.06755	1.06464	1.07801	1.08288	0.986555	1.0537	1.06864	0.98616	1.46106	1.03546
432		2	2030001..2031000	1.06744	0.974965	1.05898	1.05967	1.05659	0.888537	0.889229	0.796801	1.01341	0.819271	0.785601	0.751716	0.909144	0.806932	0.964788	1.0623	0.978291	0.966025	0.941758	1.02614	1.02254	1.02231	1.1582	0.96508	1.01106	0.986425	0.954729	0.988056	0.979487	1.05112	0.931592	0.958176	0.965346	0.964112	0.992311	1.01259	0.853194	0.844984	0.886619	0.862426	0.835541	0.766797	0.884527	0.860315	0.988471	0.754042
433		2	2031001..2032000	0.880318	0.95462	1.0023	0.818599	0.894995	0.906784	1.06806	1.05979	0.859301	1.053	0.825655	1.00192	1.00515	0.95373	0.940888	0.806391	0.876215	0.862895	0.90253	0.988567	0.918731	0.933155	0.810902	0.967636	0.985688	0.920914	0.927452	0.908067	0.959651	0.873187	0.907197	0.927842	0.973857	0.934061	0.952424	0.897299	0.90109	0.926172	0.907283	0.922171	0.852731	0.893915	0.97915	0.866685	0.693278	0.855963
434		2	2032001..2033000	0.992215	0.972842	1.024	1.0638	1.02858	0.98258	1.04425	1.06744	1.02919	0.947176	0.992988	0.905583	1.03775	0.904909	1.12713	1.04212	1.07426	0.92126	0.971795	1.00587	1.05053	1.0308	0.855344	0.942776	0.931467	1.05457	1.01099	0.995963	1.05737	1.01799	0.954025	1.03213	0.957297	1.01037	1.02072	0.950386	1.03758	0.915614	1.03587	1.04594	1.00117	0.964446	1.07364	0.990351	0.898403	0.985765
435		2	2191001..2192000	1.12205	1.1609	1.01134	1.15657	1.0736	1.04112	1.03326	1.06164	0.989555	0.999191	0.998426	1.05776	1.05476	0.999231	1.04989	1.0777	1.03752	1.07454	1.09587	1.23272	1.10466	1.0336	1.04832	1.04005	1.14247	1.16364	1.08701	0.986921	1.00025	1.05307	1.03641	1.09111	1.02067	0.959091	1.02296	1.04042	1.02434	1.01195	1.08618	1.02859	1.07534	1.04659	1.08092	1.08519	1.05373	0.973304
436		2	2229001..2230000	1.01422	0.874332	0.918948	0.780119	0.845978	1.03522	0.862216	0.995764	0.712413	1.0207	0.831237	0.872674	0.985049	0.906495	0.735926	0.903502	0.809029	0.827678	0.831914	0.780303	0.797602	0.838466	0.844162	0.678723	0.773957	0.798298	0.815163	0.858302	0.847133	0.833798	0.871045	0.808528	0.835953	0.789878	0.994708	0.885148	0.834851	0.798355	0.905184	0.926045	0.817285	0.792323	0.858085	0.851961	1.42473	0.83872
437		2	2244001..2245000	0.992041	1.00122	0.997992	0.978803	0.898493	1.00357	1.01915	1.18591	1.01231	1.16139	0.994186	0.962329	1.04968	1.06218	1.09554	0.951187	1.00156	0.975561	1.02269	0.853428	0.922621	0.928624	1.05448	0.925184	0.8968	0.971883	1.06405	0.948603	1.03136	1.01196	0.970655	1.02943	1.00885	0.962339	0.848727	0.988447	0.933646	1.02837	1.0159	0.988069	1.00029	0.944639	0.94604	0.982463	1.03112	0.945308
438		2	2259001..2260000	1.15589	1.14283	1.11107	1.10194	1.12528	1.00978	1.12278	1.17944	1.15437	1.03383	1.12115	0.968169	1.14584	0.912942	1.19989	1.20558	1.19099	1.12342	1.15791	1.07076	1.20156	1.09921	1.20617	1.18925	1.14192	1.26313	1.20889	1.1147	1.19544	1.31356	1.05009	1.13755	1.19937	1.16374	1.14724	1.15293	1.20172	1.1339	1.16204	1.10936	1.11309	1.14269	1.16635	1.16378	1.44914	1.06795
439		2	2274001..2275000	0.996361	0.996635	0.896304	0.88566	0.916654	1.01247	1.0028	1.1362	0.915595	0.958574	1.0669	0.794728	1.16757	1.03201	0.922483	0.951742	0.999275	0.89289	1.02643	0.92321	0.962678	0.805408	0.879823	0.969475	0.900769	1.13118	1.10614	0.985039	1.0346	1.07159	0.962464	1.02047	0.961197	1.15037	1.03921	1.12592	1.11599	0.927273	1.03203	1.08604	0.983083	1.09239	1.04479	1.02488	1.65212	0.966225
440		2	2331001..2332000	1.02978	0.952845	1.0405	0.826042	0.928802	1.14458	1.0623	0.981623	1.12167	0.930829	0.993175	1.05241	0.993284	0.969194	1.07747	1.1086	1.08705	1.12274	1.0673	0.95344	1.23185	1.14853	1.21026	1.1124	1.07368	1.07645	1.12548	1.08501	1.05745	1.12384	0.960885	1.09272	1.12147	1.00383	1.00634	1.06829	1.00985	1.04807	0.923205	1.11189	0.966567	1.00959	1.01792	0.942734	0.795628	1.02984
441	clade I unique CNV	2	2339001..2340000	0.993316	0.882049	0.957734	1.01278	1.00044	0.963852	1.13029	1.07861	1.05872	1.23839	1.02813	0.961813	1.02303	0.949305	0.871628	0.879955	0.892075	0.966981	0.999007	0.882386	0.942048	0.961881	0.984492	0.962461	0.84531	1.01579	0.935719	0.939685	0.938087	0.974551	0.910286	0.951183	0.953389	0.878316	0.960999	0.882749	2.73592	2.80139	2.82208	3.05267	2.8764	3.02864	2.68035	2.72352	3.7205	2.84564
442		2	2425001..2426000	1.02738	0.932939	0.988842	0.998058	1.00313	0.82763	0.811412	0.780342	0.970664	0.711718	0.857143	0.775232	0.854136	0.832006	0.934812	0.909275	0.959879	0.931632	0.828744	0.889722	0.973947	1.07184	0.969467	0.988589	0.944744	0.986456	0.864806	0.88842	0.795664	0.892776	0.806621	0.838589	0.873228	0.866705	0.738522	0.937501	0.939291	0.926903	0.86032	0.848981	0.941628	0.859539	0.817151	0.847053	0.980368	0.870569
443		2	2436001..2437000	1.16877	1.00363	1.11809	1.09141	1.0591	0.957493	1.14456	1.2352	1.10175	1.07468	0.995826	1.0201	1.08528	1.00816	1.09991	1.01112	1.12138	1.14909	1.11143	1.11577	1.00972	1.03991	1.08896	1.11428	1.08744	1.13297	1.10278	1.07449	1.03214	1.12566	1.02262	1.06411	1.05359	1.08158	0.925268	1.05727	1.03637	0.957855	1.02638	1.05416	1.01444	1.14589	1.04661	0.938981	1.27017	1.06181
444		2	2448001..2449000	1.04884	1.02161	1.02441	1.05279	1.15715	1.04049	0.990646	1.03807	1.13313	0.959604	1.138	1.02975	0.918128	1.09322	1.14816	1.11647	0.951797	1.04527	1.13403	1.05391	1.1244	1.05535	1.12259	1.11905	1.02742	1.14083	1.13861	1.06853	1.13715	1.06672	0.96147	1.12297	1.15708	1.09916	1.08079	1.09319	1.11874	1.04273	1.03644	1.15716	1.09314	1.06938	1.06879	1.05652	0.985222	1.08592
445		2	2465001..2466000	1.15272	1.09221	1.01272	1.0105	0.948212	1.05203	1.16951	1.10998	1.00447	1.10102	1.05494	1.11505	0.941273	1.01757	0.993129	0.971724	1.11615	1.12852	1.01693	0.994222	0.892339	1.10353	1.12758	1.10465	0.930984	0.965007	1.04353	1.0266	1.00423	0.922191	1.01683	0.999056	1.00198	0.962569	1.06448	0.961626	1.01077	1.01441	1.07147	1.0181	1.0133	1.01457	0.962772	0.990975	0.849955	1.00319
446		2	2677001..2678000	0.855067	0.960653	0.845455	0.891606	0.889186	0.98523	0.839468	0.673271	1.14684	0.782989	0.963003	0.943174	0.831908	0.877145	1.07697	1.18287	1.09148	1.04345	0.964318	1.17851	1.19911	1.04979	0.955651	1.21072	1.14075	1.10309	0.982238	0.916746	0.888838	1.05522	0.851984	0.954133	0.900546	0.989704	0.859589	1.05743	1.02565	0.985873	0.976445	1.06589	0.933647	0.961172	0.98094	0.875737	1.00625	0.966046
447		2	2689001..2690000	0.963869	0.997668	0.900442	0.904013	0.919964	1.02474	0.968966	0.970416	0.806158	1.04703	1.00329	1.02422	0.908809	1.0409	0.944346	0.860593	0.908299	0.889879	0.964169	0.923483	0.844891	0.945348	0.922879	0.913239	0.954683	0.928134	0.954311	1.07541	0.921877	1.01297	0.883637	1.06599	1.02265	0.919833	1.06942	0.922306	1.00032	1.01847	1.03929	0.984185	1.11884	0.996519	0.957938	0.927498	1.22618	1.02023
448		2	2692001..2693000	0.95492	0.915088	0.819888	0.935685	0.806097	1.00861	1.01636	0.930288	0.870238	1.09292	0.919432	0.893533	0.904135	0.852905	0.970947	0.819396	0.849529	0.773926	0.944378	0.782279	0.851699	0.947881	0.927835	0.84629	0.759003	1.04992	0.9874	0.867238	0.999794	0.945854	0.818946	0.892318	0.868286	0.869237	0.975578	0.989993	0.982061	0.859358	0.955281	0.975991	0.952357	0.944281	1.05993	0.789649	1.08763	0.891165
449		2	2798001..2799000	1.05055	1.09345	1.02126	1.10566	1.1013	1.04605	0.890898	1.08149	1.1094	1.04775	1.10943	1.02073	1.05093	0.951012	1.23494	1.12698	1.0622	1.02432	1.06806	1.12632	1.08965	1.1158	1.11475	0.923861	0.885245	1.08621	1.13352	1.20207	1.151	1.14488	1.12868	1.09706	1.03216	1.01708	1.06978	1.07956	1.02977	1.08554	1.08072	1.08013	1.08014	1.06494	1.03743	1.09926	0.910877	1.11739
450		2	3025001..3026000	1.00047	1.01606	0.921802	0.988337	0.951226	1.10136	1.03987	1.09348	0.877668	0.962189	1.05459	1.07816	0.998737	0.992357	0.971408	0.920484	0.937629	1.03805	1.00986	1.0576	0.916433	1.00393	1.13069	0.989097	1.01831	1.14429	1.12843	1.03495	0.987847	0.982782	1.06426	1.06748	1.12287	1.08888	0.927995	1.01892	1.02601	1.05101	0.971159	1.09204	1.02532	1.08635	1.06361	1.01543	1.37518	0.936181
451		2	3072001..3073000	1.02578	1.08548	1.01554	0.916291	1.15207	1.12156	1.08906	1.04467	1.2685	1.01866	1.15153	1.07373	1.01413	0.965576	1.41284	1.38887	1.33066	1.37176	1.02094	1.34981	1.39148	1.24176	1.21938	1.17452	1.27922	1.21035	1.1384	1.11187	1.17438	1.18604	1.0557	1.17845	1.09673	1.16026	1.17042	1.20209	1.1772	1.12441	1.13487	1.1139	1.18381	1.14461	1.16972	1.14657	1.65334	1.157
452		2	3080001..3081000	1.09994	1.1182	1.15623	1.09712	1.06098	0.995824	1.14938	0.99768	1.12893	1.03882	1.11316	0.895412	1.00434	1.03777	1.042	1.11272	1.115	1.19094	1.0583	1.08618	1.14187	1.17254	1.06565	1.14846	1.14055	1.02943	1.03656	1.10185	1.04939	1.07701	0.988225	1.09547	0.972055	1.1259	1.15676	1.06925	1.09017	1.04288	1.08443	1.15075	1.01586	1.03473	1.08914	1.04813	1.51047	1.03312
453		2	3087001..3088000	0.981545	1.03029	0.991558	1.03661	0.974735	0.905787	0.896614	1.12527	1.03057	0.878443	1.04171	0.91554	0.875763	0.832432	0.978716	1.05161	1.05317	0.994406	1.03111	1.12759	0.952806	1.03314	0.984609	1.08718	0.994109	1.07197	1.01511	1.02216	1.01725	1.08664	1.07184	1.09383	0.967304	1.07869	1.13816	1.08369	1.12734	1.03451	1.09307	1.12015	1.08193	1.07559	1.04934	1.08615	0.991527	1.0662
454		2	3088001..3089000	1.05246	1.00594	1.11707	1.01723	0.977889	0.924113	0.913129	0.887429	1.11131	0.830736	1.14674	0.956839	0.994901	0.919278	1.11133	0.928562	1.11423	1.06403	1.05141	1.04532	1.09735	1.04092	0.973106	1.0265	1.10907	1.15494	1.0522	1.01121	1.04336	1.16222	1.13593	1.12678	1.06293	1.12899	1.17514	1.0267	1.10348	1.19121	1.11966	1.15561	1.22247	1.11256	1.15025	1.16391	1.20503	1.13474
455		2	3090001..3091000	1.04788	0.997545	0.978025	1.05101	0.954498	1.1307	1.07874	1.19292	1.04005	1.05791	1.0843	1.14296	1.03785	1.0349	0.995474	0.990005	1.03998	1.0399	1.0209	0.925281	1.10108	1.05552	1.09478	1.11013	1.06847	0.997794	1.0281	1.03569	1.02561	1.05085	1.11201	1.04052	1.00733	1.06481	1.07365	1.03365	1.00429	1.04153	1.02475	1.00307	1.06441	1.11306	0.988464	0.923354	1.64723	1.05272
456		2	3092001..3093000	1.02284	1.0246	0.96152	1.14491	0.968013	0.954125	0.95291	1.2023	1.15559	1.05499	1.141	1.08307	0.903612	1.09259	1.07918	1.12086	1.05561	1.00552	1.0073	1.13285	1.10152	1.15334	1.05925	1.02434	1.11668	1.0392	1.10632	1.01592	1.02266	1.09947	1.09642	1.04736	1.0202	1.1303	1.05243	1.05669	0.955139	1.06453	1.04399	1.04781	1.03282	1.07925	0.987746	1.09485	1.43092	1.10954
457		2	3093001..3094000	1.01024	0.982649	1.02959	1.00311	0.946799	1.08651	1.05625	1.19098	0.975636	0.917889	1.21272	1.16475	1.15792	0.986865	1.09418	1.02747	1.00467	1.09878	1.06908	1.00283	1.01669	0.965828	1.0562	1.02899	1.06566	1.0445	1.09396	1.11804	1.1109	1.13503	1.12223	1.1169	1.04889	1.16505	1.20265	1.02637	1.16422	1.04729	1.07385	1.1178	1.01873	1.07343	1.09345	1.05475	1.46537	1.15017
458		2	3094001..3095000	0.941997	0.97383	0.931285	1.03127	1.1323	1.00971	1.18419	1.22559	1.03914	1.10738	1.06816	0.932593	1.04177	1.05241	1.02999	1.17508	1.07271	0.983245	1.01768	1.0077	1.11325	0.926746	1.08156	0.972077	0.988165	0.987521	0.992883	1.01953	0.960094	1.0021	1.12523	1.11571	1.05302	1.036	0.921948	1.07079	1.12654	1.06601	1.0277	0.951369	1.04237	1.03301	0.990147	1.02547	1.66392	1.00166
459		2	3098001..3099000	1.02417	1.16016	1.1347	1.18315	1.03018	1.06094	0.960896	1.03578	1.04917	1.19144	1.16079	1.15428	0.999556	1.01628	1.21586	1.2517	1.10526	1.10627	1.02275	1.11035	1.08954	1.14519	1.04707	1.10747	1.15091	1.01502	1.15387	1.10958	1.08998	1.11539	1.14031	1.10891	1.03868	1.14877	0.97958	1.11644	1.06586	1.11075	1.13018	1.073	1.12802	1.06476	1.14598	1.067	1.73414	1.14867
460		2	3100001..3101000	1.25695	1.11085	1.14315	1.0652	0.964601	0.992535	1.09541	1.06614	1.14172	0.950979	1.07917	1.03592	0.958965	0.945743	1.12983	1.11924	1.16222	1.13314	1.07128	0.95366	1.11957	1.10766	1.01911	1.11856	1.07218	1.07975	1.1375	1.0576	1.07851	1.10203	1.06912	1.01406	1.05653	1.19952	1.14498	1.08542	1.0158	0.939224	1.10728	1.14359	1.12875	1.11685	1.02818	1.05198	1.18942	1.09349
461		2	3101001..3102000	1.17735	0.989569	1.02143	0.953761	1.00682	1.08218	1.01408	1.1995	1.10996	0.949222	1.10368	1.0792	1.04201	0.948239	1.07423	1.08349	1.10232	0.930509	1.09351	1.12005	1.03765	1.01229	1.04216	1.05864	0.94859	1.12676	1.12276	1.00613	1.07529	1.06616	1.18424	1.09176	1.10925	1.16365	1.0838	1.00116	1.08577	1.0662	0.970766	1.16144	1.10207	1.06656	1.06641	1.09688	1.45071	1.02869
462		2	3102001..3103000	1.08608	1.32526	1.08576	1.28775	1.13571	1.06617	0.974832	1.18721	1.04956	1.06256	1.09091	1.2009	1.09896	0.998637	1.07753	1.09174	1.16288	1.13235	1.05524	1.04517	1.05475	1.09744	1.07417	1.07739	1.19027	1.09666	1.09833	1.06058	1.07295	1.06812	1.16028	1.06314	1.04985	1.15545	1.08825	0.985711	1.08251	1.03566	1.05185	1.03747	0.999588	1.06007	1.06229	1.08853	1.25251	1.1223
463		2	3103001..3104000	1.15237	1.10666	1.05636	1.20148	1.13065	1.07331	1.14906	1.16297	1.171	1.00941	1.06631	1.11805	1.09113	0.978433	1.22483	1.16421	1.10254	1.08553	1.0099	1.2645	1.27818	1.17221	1.30834	1.06405	1.16483	1.03133	1.05778	1.04126	1.06562	1.15599	1.11218	0.986607	1.00174	1.13246	1.04977	1.02371	1.06779	1.08943	1.13314	1.11797	1.05303	1.01382	1.05119	1.09141	1.24131	1.03409
464		2	3104001..3105000	1.12451	1.16031	1.0795	0.926687	1.2081	0.921856	0.934734	1.20955	1.13673	1.10666	0.95929	1.11083	1.06222	0.986689	1.15511	1.26568	1.32319	1.13842	0.987568	1.19326	1.21737	1.1028	1.19623	1.11346	1.03619	0.921005	1.0714	0.991136	1.02112	1.02674	1.07666	0.994548	0.914808	1.16919	1.10307	0.928372	1.02823	0.999787	1.02252	1.01748	1.00795	0.973776	0.971089	1.06182	1.75286	1.07653
465		2	3105001..3106000	1.09317	1.19482	1.13485	1.04489	1.04474	1.17166	1.04119	1.20712	1.15944	1.06232	1.13853	1.03342	1.09287	0.907988	1.1233	1.36908	1.35249	1.16072	1.04844	1.10171	1.08133	1.07932	1.32708	1.04159	1.00062	1.03257	0.982704	0.990568	1.04937	1.07721	1.0491	1.00906	1.03706	1.06989	1.05944	1.01116	1.05542	1.05239	1.11938	1.01561	1.08224	1.02686	1.12429	1.03254	1.93138	1.07518
466		2	3110001..3111000	0.973338	0.969449	0.895755	0.861529	0.954693	0.993987	0.882494	1.28849	0.965038	1.09708	1.14919	1.09676	1.14273	1.04622	0.99757	1.02329	0.850876	0.914317	0.922778	0.950738	0.911024	0.863996	1.05695	1.09178	0.960057	1.02641	1.12906	0.965517	1.01166	1.06713	1.11631	0.994548	1.08618	1.18766	0.892682	0.983134	1.08637	0.997082	1.07475	1.05354	1.00473	1.02432	1.0295	1.09162	2.18213	1.00256
467		2	3111001..3112000	1.04295	0.989513	0.919889	0.974245	1.06267	0.907493	1.07215	1.30946	0.944697	1.12785	1.10678	1.02357	1.03484	0.980696	0.932965	0.984899	0.957792	0.990104	0.944937	0.929412	0.962143	0.948952	1.01205	0.951658	0.925277	1.06287	0.96713	0.961497	1.07743	0.939918	1.06734	0.975297	0.96347	1.02382	1.11136	0.984789	1.00918	0.999266	0.924446	0.956962	0.980657	1.07396	0.935515	1.08376	1.71028	0.954971
468		2	3112001..3113000	1.21868	1.18476	1.27423	1.26492	1.19928	1.14197	1.04774	1.19598	1.12057	1.02056	1.01802	1.03438	1.14719	0.986745	1.11904	1.16081	1.07876	1.18703	1.22755	1.18609	1.2172	1.28379	1.27719	1.21112	1.36815	1.11987	1.24219	1.23092	1.23476	1.22452	1.30218	1.17448	1.21288	1.3114	1.18504	1.18706	1.18983	1.23856	1.19493	1.18401	1.23741	1.18445	1.09295	1.34202	1.42332	1.23909
469		2	3113001..3114000	1.20187	1.27325	1.25231	1.31317	1.22372	1.11033	1.02766	1.27516	1.04937	1.08773	1.08512	0.953773	1.08474	1.06573	1.31076	1.18384	1.26832	1.29269	1.20508	1.31692	1.32035	1.26441	1.32861	1.28184	1.23297	1.27528	1.28596	1.22338	1.21127	1.20492	1.3443	1.23891	1.16697	1.35781	1.25947	1.17823	1.08249	1.27653	1.28184	1.28419	1.23796	1.31563	1.2301	1.24297	1.4944	1.22972
470		2	3115001..3116000	1.082	1.07726	1.12234	1.02516	1.01592	1.04296	1.03714	1.32418	0.978771	1.08896	1.07481	1.09915	1.08113	0.985242	0.958712	1.05068	1.01162	1.0277	0.962202	1.07026	0.941695	1.08252	1.12655	1.08981	1.06914	1.07354	1.04716	1.04733	1.03305	0.940664	1.10383	1.06753	1.0746	1.11517	1.0568	0.966562	1.0179	1.08078	1.00031	0.941598	1.03839	1.05393	1.0787	1.15361	1.6697	1.05409
471		2	3116001..3117000	1.08939	1.09744	1.15495	1.04893	1.08923	1.1309	1.01718	1.30767	1.14376	1.11666	1.25334	0.962096	0.985168	0.909185	1.0434	1.13082	1.1397	1.12738	1.02628	1.11301	1.16807	1.15338	1.04041	1.10243	1.16245	1.05027	1.1379	1.07804	0.989753	1.11929	1.22558	1.15588	1.09892	1.25633	1.19999	1.03238	1.09435	1.10359	1.13458	1.09844	1.09171	1.21072	1.06295	1.26278	2.16054	1.1568
472		2	3117001..3118000	0.86773	0.934186	0.789467	0.83614	0.832565	0.817789	0.976793	1.19241	1.13968	1.03668	1.06103	0.952927	0.914765	1.02547	1.1075	1.18687	1.078	0.981715	1.08209	1.05199	0.93079	1.07475	0.975467	1.11178	1.11258	1.0291	0.964578	0.993035	1.11372	0.946601	1.13582	1.07859	1.01736	1.18391	1.03611	1.08159	0.966937	1.07465	1.03765	1.01582	1.0669	1.06934	0.94932	1.14956	1.73292	1.10791
473		2	3119001..3120000	1.0372	1.04089	0.953684	1.00285	1.14352	0.988152	1.02987	1.15978	1.10652	0.893557	1.12586	0.84834	0.951658	1.07171	1.09762	1.08159	1.06314	1.08375	1.07345	1.08279	1.05958	1.07669	1.08016	1.0619	1.02963	1.03403	1.0107	1.0492	1.02736	1.05872	1.2032	1.04384	1.08312	1.11766	0.956844	1.08486	1.02466	1.09612	0.985536	0.99689	0.93411	1.01409	1.02073	1.13518	1.29651	1.06505
474		2	3121001..3122000	1.01306	1.07808	1.03665	0.969865	1.0108	1.0685	1.1133	1.36155	1.08588	1.06193	1.06648	1.12501	1.12331	0.83747	1.11322	1.01285	1.10561	1.14706	1.05122	0.965475	0.932298	1.01535	0.983429	0.897642	1.02394	1.01676	1.03268	1.01904	1.04464	1.00137	1.05406	0.971736	0.992763	1.09292	1.00456	1.06114	1.02527	1.01202	1.02154	1.02671	1.02816	0.97793	1.04958	1.07672	1.67918	1.02403
475		2	3122001..3123000	0.94071	0.995141	1.00139	0.980557	1.03843	1.08537	1.02562	1.35905	1.05276	1.08321	1.12433	1.12548	1.12063	0.999973	0.875216	0.917541	1.04982	0.888803	0.983746	0.910156	1.03642	0.914401	1.06915	0.894207	0.916408	0.995106	1.12022	1.01398	1.01791	1.02123	1.10867	1.04483	1.0313	1.13418	1.06072	0.911889	1.01489	1.03379	0.99802	0.933869	1.01573	1.0365	1.02896	1.13863	1.87028	1.13957
476		2	3123001..3124000	0.958968	0.951565	1.00588	1.09109	1.1357	1.00804	0.905243	1.24223	0.993923	1.00198	1.07344	1.02278	0.931698	0.909129	0.973386	1.0752	0.846268	0.865966	1.08522	0.83413	0.846861	1.01974	1.04123	1.02833	1.10403	1.06905	1.11915	0.968614	1.13294	0.980524	1.1064	0.964879	1.07869	1.10937	1.0939	1.03409	0.92584	1.0364	1.0405	0.945729	1.00809	0.995639	1.03593	1.05793	1.98601	1.07084
477		2	3124001..3125000	0.796656	0.833789	0.923243	0.846278	0.763311	1.02979	1.04084	1.4116	0.824912	1.23726	0.939969	1.0146	0.940159	0.94873	0.892401	0.837169	0.904927	1.11141	1.0299	0.69817	0.815435	0.821869	0.808317	0.824213	0.730079	1.00741	0.916012	0.920615	0.941192	0.821362	1.02712	0.952457	0.922699	0.957821	0.974236	0.843301	0.885095	0.950964	0.988152	0.928742	0.934221	0.982677	0.875395	0.990965	1.84833	0.935493
478		2	3125001..3126000	0.981706	0.950789	0.966168	0.811643	0.861742	0.978145	0.972571	1.46534	0.901652	1.22176	0.911632	1.08269	1.12434	0.962366	0.84607	1.00717	0.783589	0.955903	0.955332	0.90284	0.871186	0.916814	0.802404	0.958011	0.868324	0.984641	0.88367	0.953191	0.962569	0.915185	1.02156	0.946711	0.935069	0.955664	1.08884	0.850576	0.950854	0.942539	0.954397	1.02531	0.957791	0.972937	0.888772	1.02774	2.14805	0.980536
479		2	3126001..3127000	1.0086	0.97847	1.08669	1.04427	1.06345	1.23916	1.10477	1.36745	1.04283	1.16141	1.20363	1.00346	1.04139	0.977014	1.00369	1.19934	0.968619	1.0779	1.03332	0.959557	1.11394	1.06689	1.05327	1.01719	1.06335	1.10839	1.0662	1.00486	1.05016	1.18347	1.11419	1.01121	1.16494	1.09604	0.969157	1.11654	1.03789	1.07227	1.1128	1.07373	1.1066	1.13002	1.1203	1.15903	2.36468	1.09266
480		2	3127001..3128000	1.06796	1.2026	1.10676	1.09245	1.02919	1.10542	1.0552	1.26492	1.0901	1.08548	1.09175	1.02529	1.05967	1.05088	0.945306	0.992619	1.23201	1.06161	1.12813	1.13915	1.12882	1.10932	1.08998	0.97398	1.15093	1.14523	1.08095	1.07638	1.12954	1.07415	1.10829	1.1064	1.14649	1.21499	1.09961	1.15505	0.979302	1.1431	1.08805	1.06863	1.09539	1.05958	1.16716	1.16613	1.50991	1.05772
481		2	3128001..3129000	1.06922	0.843506	0.964756	0.900545	0.957238	0.969853	0.960245	1.20923	1.03228	0.92349	1.04801	0.964305	1.06534	0.945363	1.03417	0.982426	1.19635	0.832518	1.086	1.00143	0.891002	0.982249	1.05856	1.05004	0.979428	1.08689	1.06253	1.0484	1.18672	1.08321	1.17668	1.09594	1.09028	1.14053	1.1839	1.04682	1.03728	1.08605	1.08033	1.01391	1.09154	1.09823	1.01775	1.13689	1.61112	1.03501
482		2	3129001..3130000	0.914407	0.968854	1.03782	0.944138	1.03104	1.06478	0.917644	1.21101	0.933317	0.885175	1.02341	0.930014	0.91087	0.886013	0.986651	1.0128	0.93857	0.904338	1.03369	0.918512	0.951761	0.808509	0.999566	0.966829	0.950644	0.912416	1.09056	0.942995	1.05524	0.952372	1.16889	1.0786	1.10659	1.05276	0.993498	1.00385	0.929596	1.06648	0.960961	0.97524	0.940451	0.98416	0.976909	1.08807	1.5119	1.03423
483		2	3130001..3131000	0.940165	1.04952	1.13663	1.05094	1.03514	1.04036	1.08908	1.38287	0.976458	0.950656	1.06686	1.01557	0.977919	0.880846	0.999892	1.02814	0.968761	0.950645	1.05609	0.912647	1.03316	1.07683	0.973213	1.02877	0.905072	1.1362	1.09794	1.03834	1.0188	1.07066	1.16528	1.06012	1.19747	1.20061	1.04785	1.00925	1.10516	1.04429	1.07001	1.02555	1.05305	1.09721	1.07585	1.21492	1.65997	1.07188
484		2	3131001..3132000	0.997921	0.898148	0.845327	0.864631	0.902006	1.03759	1.07618	1.33231	0.927152	1.24117	1.03912	1.15713	1.06436	0.946587	0.900016	0.94042	0.926478	0.95	0.93802	0.890794	0.956465	0.820519	1.01443	0.947914	0.863829	0.958335	0.979055	1.10473	1.01148	0.931096	0.998945	0.983037	1.06676	1.01484	1.12325	1.02217	1.04925	1.05949	1.04822	1.009	1.03623	1.04585	1.01803	1.10669	1.29225	0.998923
485		2	3132001..3133000	0.98105	0.988502	1.03857	0.90431	0.903342	1.05159	0.999842	1.33166	0.870181	1.01538	1.18462	1.06415	0.8795	0.984212	0.969857	0.957713	0.952769	0.862871	1.01533	0.902966	0.975527	0.953938	1.0144	0.975303	1.08853	1.01101	1.08307	1.0471	1.07173	1.01957	1.08476	1.07399	1.07234	1.06639	1.05005	1.05886	0.98074	1.04204	0.9759	1.0059	1.10763	0.994166	1.06051	1.12233	1.30908	1.05324
486		2	3133001..3134000	1.02508	0.97993	0.965197	0.885521	1.05476	1.07458	1.00875	1.41561	0.929255	1.04628	1.22779	1.00123	0.969714	1.01895	1.01425	0.973944	1.00914	0.914245	1.173	0.917944	1.02037	1.0177	1.16672	0.927341	1.03183	1.12406	1.10714	1.06376	1.05607	1.14691	1.10161	1.1758	1.24234	1.1914	1.05971	1.14691	1.08216	1.08643	1.08513	1.05972	1.12781	1.11339	1.10944	1.2608	1.52283	1.12005
487		2	3136001..3137000	0.976111	1.04387	1.05081	1.09375	0.972119	0.94222	1.12057	1.29295	1.06177	1.02517	1.13168	1.07586	1.16003	1.03498	1.01541	1.04745	0.958289	1.0333	1.1554	1.01296	0.976354	1.09446	1.05731	0.958047	1.09669	1.08526	1.08532	1.13669	1.048	1.06106	1.11932	0.964688	1.1912	1.14946	1.11441	0.996188	1.06678	1.0621	1.10549	1.04496	1.10908	1.08547	1.05187	1.20354	1.37735	1.14799
488		2	3137001..3138000	0.991212	0.927187	0.876425	0.93513	0.979498	1.07961	0.990779	1.47586	0.935542	1.07083	1.0843	1.13652	1.13486	1.01135	1.16196	0.851321	1.06814	1.03807	1.09161	0.907276	0.939762	0.91635	1.02467	0.932788	0.948467	0.968445	0.99363	1.04228	1.09726	0.917186	1.02721	0.991925	1.17415	1.08681	0.993564	0.965273	0.934899	1.0185	1.08347	0.968318	1.05023	1.08157	1.06385	1.20319	2.19539	1.02232
489		2	3138001..3139000	1.02555	1.08121	1.05091	0.989843	1.03365	1.07755	1.05678	1.5816	0.94672	1.16511	1.0954	1.04246	1.0332	1.06697	1.06263	0.926456	0.988854	0.901554	1.16267	1.00552	0.900326	0.890309	0.934275	0.951132	0.8824	0.978079	1.06694	1.14501	1.09516	0.956898	1.10254	0.991607	1.29882	1.13895	1.03521	0.913901	0.98523	1.08797	1.1129	0.996463	1.12097	1.20753	0.959535	1.22925	2.17269	1.09946
490		2	3139001..3140000	0.862841	0.952508	0.920223	0.995264	1.07454	1.06474	1.14287	1.47403	1.025	1.02973	1.16216	1.1894	1.0274	0.931365	1.05424	1.01307	1.05919	0.947466	1.08107	1.01366	0.933684	1.05237	0.942295	0.908327	0.963341	0.973891	1.00126	1.07393	1.16259	0.935917	1.10721	0.961692	1.33935	1.02049	0.980173	0.887864	1.01068	0.95464	1.00095	0.994943	1.06145	0.991322	1.00184	1.25106	2.0381	1.14049
491		2	3140001..3141000	0.923294	0.981638	0.909269	0.845039	0.832588	0.930533	0.949722	1.38001	0.934849	1.00668	1.10007	0.992464	1.03677	0.90591	0.930264	1.01214	1.04296	0.929517	1.09189	0.955679	0.965255	1.00348	0.903132	0.973654	0.954569	0.988393	1.04798	1.0332	1.11448	1.04724	1.15991	1.05912	1.23691	1.13083	1.06177	0.970675	1.07201	1.03003	1.00113	0.937107	1.08423	1.04564	1.05082	1.19312	1.98218	1.10986
492		2	3141001..3142000	0.86117	0.91492	0.911681	0.79106	0.823079	0.975582	0.875009	1.31318	0.924234	1.00041	1.13815	1.09564	0.93222	0.925558	0.918682	0.906755	0.959899	0.906931	1.20438	0.857695	0.972926	0.896933	0.874486	0.911862	0.809563	1.07549	1.14914	1.08269	1.15527	0.975565	1.16566	1.04664	1.33923	1.14922	1.01039	1.05556	0.955736	0.912108	1.04593	1.04082	1.02542	1.16739	1.01943	1.1851	1.87026	1.09772
493		2	3142001..3143000	0.831227	0.993725	1.05048	0.95058	0.895159	0.999681	1.02997	1.30412	0.987403	1.09302	1.19291	0.959263	0.955366	0.919853	0.939561	1.04475	0.913545	0.774034	1.12216	0.899687	0.914744	1.03353	0.933065	0.92223	0.943971	0.99538	0.991563	1.06222	1.05784	1.02616	1.12666	1.01296	1.27767	1.11247	0.950049	0.901056	0.983968	0.967582	1.02451	0.956734	1.01776	1.17888	0.978967	1.29903	1.52658	1.01719
494		2	3144001..3145000	0.915335	0.926199	0.905817	0.82733	0.88173	0.965435	1.07501	1.39556	0.899533	0.953268	1.04079	0.92542	1.03215	0.885113	0.783371	0.867787	0.855828	0.948841	1.07734	0.939712	0.92036	0.932124	0.929806	0.954848	0.871608	0.942758	1.00989	1.0319	0.963404	0.891347	1.00421	0.934599	1.35499	1.07129	0.943959	0.924358	0.910452	0.934115	1.00824	0.91768	1.05364	0.940976	0.964637	1.13748	1.60679	0.996823
495		2	3145001..3146000	0.84691	0.91192	0.941092	0.923754	0.993294	0.867964	0.966195	1.00627	0.78979	0.903993	1.04566	0.926753	0.846671	0.862284	0.873771	0.882842	0.901959	0.828467	1.03863	0.915884	1.01789	0.871571	0.999771	0.896264	0.994864	0.82935	0.926142	1.02713	0.969466	0.931741	1.13882	0.942486	1.29416	1.08771	0.903742	0.952646	0.943321	0.970517	0.96222	0.884503	0.966779	0.904023	1.05529	1.17122	1.71362	1.01487
496		2	3146001..3147000	0.98506	0.926816	0.904022	0.955872	0.922822	1.10356	1.15595	1.31032	0.883052	1.16672	0.980065	0.924836	1.06831	1.03319	0.816579	0.758113	0.956719	0.99394	1.02008	0.838513	0.917211	0.967323	0.898243	0.812694	0.877571	0.848182	0.969517	1.03577	0.948019	0.790665	1.05571	0.912862	1.406	0.993822	1.03464	0.894425	0.94519	0.995189	0.982321	0.939937	0.868804	0.914202	0.977145	1.10219	1.70873	0.97983
497		2	3147001..3148000	0.943953	1.0107	0.954518	1.0235	0.855957	1.01715	1.02741	1.34743	1.05575	1.092	1.16303	0.598511	1.06636	1.01048	1.03909	0.983112	0.914214	1.00679	1.2982	0.973694	1.00316	1.06786	0.915737	0.898548	0.966617	1.02678	1.08298	1.18233	1.14936	1.10064	1.20178	1.13347	1.60172	1.30012	1.216	1.07292	1.1677	1.14965	1.11169	1.06599	1.13849	1.08008	1.06295	1.35819	1.64187	1.10247
498		2	3148001..3149000	1.06726	1.09455	0.989205	0.988168	1.0523	1.08732	1.13094	1.32581	1.01081	1.07645	1.10573	0.728658	1.12032	0.985836	0.976785	0.95744	0.938074	1.03978	1.23667	0.959915	0.978797	1.03275	0.96173	1.02368	1.02238	1.01605	1.0871	1.153	1.11356	1.02697	1.21695	1.13514	1.58584	1.252	1.15069	0.983957	0.98481	0.991262	1.02022	1.03713	1.05901	1.13678	1.02138	1.30061	1.59342	1.13611
499		2	3149001..3150000	0.970368	0.937253	0.970572	1.05624	0.886828	0.95528	0.888828	1.0144	0.873856	0.818442	1.0569	0.55071	0.93367	0.751431	0.826196	0.815278	0.898637	0.871416	1.28175	0.872453	0.870274	0.959644	0.993692	0.897741	0.816447	1.02452	1.12189	1.08905	1.03346	0.958133	1.18392	1.17247	1.08351	0.828905	1.11753	1.18971	1.0609	1.06291	1.05827	1.02311	0.992402	1.11891	1.0243	1.33427	1.31939	1.12303
500		2	3150001..3151000	0.881506	0.790853	0.816623	0.811127	0.771392	0.909758	0.991789	1.33996	0.707658	0.947108	0.92278	0.559529	0.930495	0.731886	0.762076	0.78355	0.761673	0.716697	1.0456	0.792958	0.847116	0.878139	0.830552	0.823769	0.782352	0.828559	0.87483	1.04244	0.908192	0.90381	0.960352	0.896461	0	0	0.956866	0.805795	0.959394	0.902582	1.00054	0.893371	0.900496	0.911133	1.02723	1.13398	1.33349	0.904484
501		2	3151001..3152000	0.920744	1.05562	0.924499	0.99672	0.923696	1.06704	0.999458	1.28246	0.857133	1.02646	0.990464	0.701754	1.01517	0.95245	0.8789	0.87547	0.857692	0.975955	1.16394	0.953818	0.911632	0.824682	0.941631	0.816228	0.858455	0.875117	1.05352	1.06795	1.03018	0.94036	1.10222	0.906888	0	0	1.18757	0.891917	0.923688	0.976357	0.992939	0.989654	0.997414	0.95444	0.981894	1.15842	2.20089	1.05002
502		2	3152001..3153000	1.03158	1.10369	1.13419	0.953503	1.13385	1.15443	1.08298	1.23118	0.971905	1.06723	1.16137	0.644687	1.00939	0.961392	0.984803	1.08283	0.958025	0.983998	1.32819	0.965948	1.05765	1.1259	1.29383	0.967835	1.06517	1.12091	1.36215	1.19329	1.23515	1.34498	1.27051	1.21077	0	0	0.879181	1.09713	1.09049	1.14321	1.12863	1.12595	1.14704	1.21434	1.19195	1.27894	2.11894	1.20865
503		2	3153001..3154000	0.878981	1.06686	0.938827	0.979021	0.986306	1.08084	1.06638	1.19278	0.855634	1.08435	1.02239	0.683942	1.09349	1.08393	0.885627	0.864176	0.939765	0.899642	1.3213	0.87302	0.992534	0.922303	0.897912	0.903125	1.0281	1.17347	1.19158	1.18812	1.21917	1.05848	1.14342	1.14524	0	0.00205453	0	1.01816	1.042	1.06732	1.05355	1.17045	1.16199	1.03028	1.08429	1.31454	2.46483	1.08689
504		2	3154001..3155000	0.889106	0.98585	0.97981	0.954435	1.06506	0.918987	0.772749	0.546204	0.62817	0.711711	1.10322	0.61207	0.784848	0.742099	0.655924	0.686703	0.751373	0.81237	1.24888	0.757641	0.743419	0.721379	0.846416	0.764813	0.72093	1.38721	1.20168	1.0692	0.933705	1.3071	1.28466	1.14595	0.873054	1.10122	0.87762	1.16622	1.31702	1.5935	1.61629	1.33492	1.32683	1.35118	1.47582	1.21752	1.5829	1.22627
505		2	3155001..3156000	0.410624	0.572439	0.534264	0.383471	0.561814	0.354077	0.220599	0.0161836	0.197276	0.220125	0.710764	0.303431	0.144066	0.132289	0.173532	0.172126	0.261995	0.198996	0.694715	0.322641	0.197679	0.21401	0.307121	0.267557	0.2367	1.19886	0.873316	0.674803	0.293022	0.964306	0.752739	0.78475	1.11948	1.77951	0.975134	0.777847	0.719663	1.66543	1.10809	0.885546	0.904029	1.10626	1.18788	0.797669	0.89807	0.842978
506		3	1..1000	0.89865	0.934208	0.852457	0.858735	0.915147	0.985799	0.00214467	0.815311	0.717346	0.00502921	0.00447774	0.00566488	0.00115381	0.00196659	0.723609	0.866724	0.742612	0.858079	0.975244	0.871528	0.856975	0.780493	0.797272	0.735621	0.759276	0.964916	0.907647	0.895901	0.752869	0.941033	0.990887	0.94468	0.892646	0.948511	0.976479	0.987228	0.880028	0.942259	0.910926	0.885129	0.856203	0.921824	0.00846756	0.00300806	1.8316	0.911644
507		3	1001..2000	1.00442	1.0466	1.04659	1.01638	1.02822	1.01617	0	1.17378	0.89095	0	0	0.276713	0.306105	0.254868	1.00841	1.03938	1.05957	1.05064	1.049	1.03914	0.970944	1.04534	0.953476	0.934873	1.00066	0.961914	1.01964	1.03275	0.787794	0.871601	1.11993	0.996369	1.0144	0.97204	1.11833	0.966889	0.972327	0.934065	0.987679	0.980681	0.992634	1.00992	0	0	1.48651	0.996063
508		3	2001..3000	1.01799	0.91137	0.94883	0.991528	0.952569	1.085	0	1.23866	0.781892	0	0	0.995014	1.07701	0.976383	1.04895	0.958804	0.941842	0.906537	0.990076	1.05176	0.879599	1.02748	1.00565	1.0081	1.00678	0.970676	0.939184	0.983176	0.882167	0.962558	1.07307	0.98851	0.940069	0.973549	0.961681	0.920542	0.904142	0.89558	0.955871	0.911745	0.9388	1.00231	0	0	1.28852	0.93695
509		3	3001..4000	0.968808	0.917223	0.924136	0.992905	1.05583	0.775889	0	0.921796	0.898856	0	0.00210717	0.910878	0.877133	0.824279	1.05635	1.00692	0.958167	0.887178	0.925938	0.971813	0.951007	1.03345	1.16151	1.0068	0.976723	0.964166	0.918699	0.912655	1.0044	0.924007	1.00095	0.853332	0.878566	0.949526	0.997588	1.04119	0.762792	0.723918	0.764127	0.722151	0.689218	0.805408	0	0	0.604351	0.73578
510		3	4001..5000	1.01578	1.16737	1.00058	1.05944	1.09868	0.952166	0	0.946202	0.85723	0	0	0.837176	0.771722	0.755133	1.07248	1.02676	1.02473	0.945447	0.986972	1.11607	1.03176	0.945524	0.925757	0.934157	0.951505	0.925599	0.955505	0.989006	1.03654	0.995716	1.03025	0.942622	1.00395	1.09507	1.00687	0.973807	0.912183	1.01465	0.864589	0.824578	0.93087	0.88663	0	0	0.890473	0.895053
511		3	5001..6000	0.876753	0.885644	0.9478	0.921316	1.02877	0.662629	0	0.914299	0.505242	0	0	0.622057	0.736773	0.647926	0.783217	0.874322	0.751363	0.81482	0.86512	0.87054	0.784995	0.910269	0.908195	0.820134	0.760602	0.932556	0.904134	0.884942	0.919873	0.887909	1.00877	0.848014	0.845868	0.92436	0.95337	0.95667	0.886993	0.918679	0.901594	0.926947	0.935962	0.937447	0	0	1.0157	0.891138
512		3	6001..7000	0.893327	0.850235	0.813327	0.898622	0.895167	0.967745	0	1.24311	0.769618	0	0.00212417	1.03816	1.03162	0.882107	0.693372	0.821653	0.733386	0.820771	0.879541	0.791403	0.902465	0.787997	0.874076	0.819826	0.88326	0.88899	0.849707	0.837954	0.928341	0.860973	0.955791	0.877255	0.81874	0.863014	0.880522	0.80747	0.871399	0.922415	0.910176	0.878863	0.848293	0.909905	0	0	1.20766	0.854926
513		3	7001..8000	0.872743	0.863087	0.885242	0.818342	0.857776	1.07338	0	1.48738	0.75769	0	0.540668	1.15396	1.02841	1.06422	0.755065	0.772886	0.810649	0.94712	0.873948	0.857517	0.976512	0.852297	0.842914	0.893455	0.715767	0.900419	0.926094	0.905112	0.974417	0.870855	0.965437	0.834199	0.88059	0.913584	0.794592	0.83103	0.928158	0.841298	0.935564	0.925912	0.840644	0.918274	0.00266889	0	1.69672	0.90114
514		3	8001..9000	0.995148	0.919031	1.01272	0.861638	0.919121	0.935344	0.333634	1.36852	1.01496	0.438902	1.02273	1.05425	1.01644	1.03983	1.02071	0.817939	0.868316	0.973494	0.95604	0.979181	0.965668	0.971054	0.962364	1.08589	0.921501	0.91918	1.02844	0.985208	0.9955	0.968752	1.05615	0.868231	0.986524	0.98441	0.874871	0.914417	1.00747	1.04624	0.983357	0.942529	0.92623	1.04706	0	0	1.62702	0.954327
515		3	9001..10000	0.956616	0.882218	1.00599	0.859587	0.876819	1.06091	1.07061	1.40361	0.896664	1.05157	1.05784	1.04199	1.01829	0.943591	1.07633	0.977329	0.91313	0.968499	1.02937	1.08189	1.02351	0.977431	0.861851	1.02635	0.904352	1.03746	0.960182	0.981827	1.03959	0.949154	0.990452	0.892135	1.05241	0.999772	1.01793	0.997159	0.993379	0.942389	0.937868	1.05223	0.891639	0.955504	0.0118117	0.00894968	1.62232	0.985676
516		3	10001..11000	1.02851	1.05587	1.02032	1.02746	1.10484	0.950189	0.899126	1.41319	0.919447	1.16589	1.1042	1.014	1.19427	0.984351	1.06154	1.07774	0.988398	0.847444	1.13194	0.911554	0.926256	0.990815	0.998181	1.12582	1.046	0.964825	1.06684	1.08681	1.03566	1.14236	1.03784	1.00629	1.01189	1.05781	1.00854	1.03756	0.930183	0.988067	0.931974	0.991601	0.97319	0.988713	1.27544	1.01518	1.77104	1.01836
517		3	13001..14000	1.20562	1.21851	1.24333	1.2125	1.30406	0.942972	0.958843	1.14646	1.30796	0.850718	1.14987	0.952051	1.04358	0.891514	1.27178	1.27648	1.12735	1.2075	1.05274	1.10257	1.16579	1.15372	1.22241	1.32718	1.25351	1.03772	1.09488	1.12934	1.13891	1.12885	1.1198	0.948742	1.09701	1.05977	1.07022	1.11421	1.05063	1.11147	0.984205	1.0269	1.10183	1.12692	1.27022	1.34026	1.31519	1.06338
518		3	14001..15000	1.30366	1.28921	1.22019	1.23553	1.30302	1.05749	0.966579	1.34548	1.18799	1.10868	1.16422	1.06411	1.13235	1.02548	1.20542	0.997086	1.24021	1.13324	1.07793	1.18081	1.21477	1.14763	1.0862	1.38781	1.20162	1.12445	0.982267	1.03789	1.14449	1.01383	1.12324	1.06924	1.02968	1.04648	1.08044	1.03998	1.08784	1.04657	1.04502	1.13431	1.11122	0.987772	1.14926	1.26141	1.27568	1.0579
519		3	17001..18000	0.968177	1.00321	1.03049	1.00265	1.06722	0.944433	1.07032	1.31528	1.25016	0.963266	1.24726	0.959876	0.976894	0.970288	1.05932	1.04877	1.07938	1.05676	1.07202	1.16252	1.0715	0.961961	1.01378	1.06611	1.16234	1.09083	1.03013	1.02194	1.11817	1.218	1.11233	1.03616	1.0555	1.07171	1.10891	1.15753	1.06576	1.17857	1.08222	1.13334	1.16182	1.16437	1.30951	1.38663	1.43555	1.14026
520		3	18001..19000	0.878103	0.965382	0.943132	0.940164	1.01011	1.01292	0.977678	1.21638	1.04949	1.09046	1.23378	1.01807	1.07793	0.978359	0.823792	0.967051	0.804016	0.860242	0.910622	0.907002	0.911291	0.860296	0.852846	1.01742	0.857357	0.833974	0.93244	0.881845	0.947646	0.940886	0.931698	0.935055	0.826599	0.898128	0.848749	0.919135	0.996138	1.01601	0.913668	0.947448	0.920091	0.981644	1.1108	1.09552	1.60091	0.931175
521		3	20001..21000	1.00053	1.13255	1.04337	0.932811	1.18774	0.941616	1.00795	1.44433	0.845214	1.09105	1.11614	0.984015	1.07369	0.955001	1.16326	1.09983	1.0272	1.15243	0.943809	1.18253	1.11345	1.05638	1.17034	1.1813	1.12322	1.03343	0.973165	1.0065	1.08034	1.0722	1.17883	0.949725	0.997217	1.07102	1.05977	1.0468	1.01988	1.11353	0.939663	1.05615	0.980194	1.03686	1.07717	1.31066	1.25752	1.03399
522		3	25001..26000	1.05205	1.00703	0.971072	1.133	0.997854	1.03803	0.960621	1.3148	0.848945	1.08395	1.14662	1.07614	1.08967	0.970632	0.888232	0.970455	0.881785	1.00231	1.06118	1.09982	0.988887	0.946771	0.935884	1.06327	0.968724	0.938184	0.925046	1.03344	1.0731	1.00871	1.09439	0.961528	0.964032	0.913473	1.15338	0.953003	1.03385	1.09631	1.01469	1.03276	0.93714	0.953591	1.08763	1.30394	1.7807	1.00289
523		3	26001..27000	1.18019	1.03349	1.10891	1.20203	1.00526	1.08844	1.02389	1.3834	0.945156	1.11353	1.11887	1.12053	1.13147	0.913137	1.01747	1.03921	1.05972	1.05994	0.968066	1.1592	0.970434	1.00883	0.990844	1.03284	0.954042	1.01075	1.10027	0.984897	0.966086	1.01721	1.11797	1.069	1.02958	1.08165	1.02356	0.882789	0.904973	1.0999	0.979115	1.10179	1.09051	1.05103	1.05528	1.19816	2.455	1.04985
524		3	27001..28000	1.15398	1.15951	1.10436	1.13104	1.08298	1.00556	1.09963	1.35725	0.962282	1.12938	1.19156	1.0415	1.0289	1.0126	0.909799	1.0985	1.22323	0.988145	1.0111	1.18681	1.01246	1.021	1.09832	1.04747	1.1163	1.12855	1.16287	1.00795	1.02379	1.0961	1.15224	1.00665	1.06673	1.04215	1.0439	1.12646	1.05823	1.07911	1.05514	1.02219	1.16219	1.07836	1.17788	1.25494	1.49258	1.14561
525		3	29001..30000	0.688386	0.865772	0.811817	0.914607	0.832643	0.973273	1.04176	1.11331	0.918085	0.933306	1.17739	1.01032	0.999842	0.945446	1.03839	0.956208	0.962289	0.905019	0.87516	1.15375	1.07175	1.0023	1.02467	1.05862	0.950548	1.00942	0.97267	0.958231	0.943019	1.12852	1.01389	0.985478	0.952728	1.06345	1.03657	1.09755	1.10911	1.17853	1.13672	1.12098	1.11013	1.03908	1.11044	1.27645	1.21437	1.09163
526		3	31001..32000	1.03283	1.03134	0.973573	1.07657	0.917442	0.890934	1.00432	1.29528	0.908753	0.983767	1.03522	1.02656	1.02288	0.996216	0.961093	0.914823	1.04478	0.892173	0.90377	0.937694	0.915193	1.05201	1.02159	0.981774	0.874541	1.03107	0.978677	0.970317	1.00846	1.0793	1.08162	1.03885	0.968205	1.059	0.950159	0.949791	0.969617	0.964106	1.02502	1.084	0.945221	0.914714	1.02028	1.21124	1.72832	1.022
527		3	33001..34000	1.06683	1.05431	1.09285	1.18218	1.13278	1.01567	1.07286	1.27535	0.975548	1.079	1.15071	0.950318	1.11532	1.01479	0.99474	1.09627	1.0081	1.03448	0.987242	1.19275	0.987052	1.00333	1.04353	1.20862	0.995593	1.02782	1.01144	1.03916	1.04573	1.08978	1.14913	1.01315	1.03061	1.00991	1.15951	1.03908	1.04098	1.04123	1.03543	0.965432	1.05429	1.012	1.10794	1.21297	1.41537	1.02889
528		3	34001..35000	1.08734	1.07446	1.14618	1.20855	1.20257	0.961035	1.0031	1.35491	1.06001	1.02835	1.11314	1.00617	1.06674	1.00374	1.11045	1.11176	0.947878	1.17224	1.13009	1.14734	1.05272	1.04637	1.05842	1.25968	1.08574	1.07824	0.995386	0.998235	1.06439	1.13953	1.15744	1.09445	1.01408	1.0412	1.02855	0.880727	1.04056	1.06017	1.01921	1.02904	1.06328	1.11049	0.980457	1.18322	1.17039	1.10522
529		3	40001..41000	0.905272	0.97237	1.04371	1.05907	1.12644	1.11625	0.968423	1.35154	1.12933	1.0679	1.06603	1.16328	1.06036	1.03204	0.987598	0.962415	1.0061	0.916838	1.02165	1.15093	1.0778	0.961537	1.05255	1.07691	1.0089	0.998899	1.02274	0.968702	0.993192	1.06056	1.00134	1.02527	0.967387	1.01569	1.00414	0.921851	1.04939	0.967291	1.00233	1.00442	1.04765	1.07273	1.05558	1.09682	1.74845	1.00076
530		3	41001..42000	0.907352	0.969449	1.06881	1.0931	1.00372	1.02012	1.04392	1.33212	1.006	1.18792	1.02338	0.935037	0.909667	0.907719	0.973339	0.995346	1.10931	0.975561	1.03737	1.06108	1.11997	1.03305	1.18012	1.06767	0.992906	1.07232	0.999976	0.958258	1.06373	0.984589	1.15064	0.938069	1.00448	0.963797	0.913527	0.995187	0.957839	0.944893	0.959496	0.956649	0.99994	0.981582	0.989932	1.12191	1.85986	0.966546
531		3	42001..43000	1.02794	0.996612	1.01344	0.92411	1.02917	1.0808	1.03936	1.24745	1.05628	0.991509	1.16577	1.02446	1.04728	1.00482	1.08718	1.05214	1.06796	1.08066	1.01886	1.30538	0.927058	0.99354	1.08115	1.07181	1.08602	0.994457	1.02511	0.994241	0.999155	1.07731	1.30839	1.07031	0.990077	1.05612	1.02998	1.09968	1.02653	1.0727	1.06382	1.02013	1.01328	1.09581	1.1127	1.11719	1.91948	0.954175
532		3	43001..44000	1.0647	1.09271	1.08646	1.23053	0.920761	0.937557	1.015	1.17588	1.165	1.04738	1.1343	0.977221	1.07643	0.907506	1.05585	1.23324	1.11406	1.28043	0.96677	1.24286	1.16579	1.08751	1.12588	1.21481	1.08178	1.09242	1.06766	1.07424	1.08791	1.10378	1.25545	1.09029	1.06675	1.10331	1.15672	1.21097	1.07667	1.16821	1.09023	1.10913	1.09475	1.13057	1.14301	1.21747	1.29069	1.05173
533		3	46001..47000	0.778534	0.8704	1.07324	1.05178	1.0645	0.922311	1.07096	1.33631	1.09457	1.07004	1.11374	0.980492	1.07833	1.0528	1.16833	1.05697	1.0203	1.15702	1.12498	1.09459	1.00115	0.960842	1.04326	1.17243	0.952418	0.99035	0.999908	1.03806	1.04131	1.01011	1.11812	1.04445	1.02983	0.970046	0.913747	0.960218	1.01414	1.03948	1.05825	0.980026	0.985619	0.922325	1.08373	1.14635	1.70488	1.10563
534		3	47001..48000	1.02326	0.975414	0.980545	0.93411	0.912562	1.04113	1.0272	1.11469	1.06589	1.11242	1.1034	0.998752	1.10822	1.01551	1.00896	1.03353	1.022	1.03291	1.10551	1.03682	0.929915	1.05609	1.06278	1.21506	0.926286	1.04031	1.05562	0.982865	1.04588	1.03824	1.14079	0.973038	1.01633	0.980216	1.01039	0.988268	1.00607	0.987426	0.998824	1.02115	1.04603	1.06272	1.00885	1.07494	1.90014	1.06508
535		3	52001..53000	1.06427	0.897788	1.00339	0.941591	1.07284	1.01088	1.04154	1.26604	1.13198	1.21395	1.07897	1.01334	1.09326	0.954379	1.08153	1.02748	0.935289	1.12453	1.0806	0.974514	0.952527	1.05455	0.981067	1.09281	1.08063	1.00954	0.989215	0.995271	1.07261	1.02977	1.16539	1.00272	1.09959	1.00783	0.943013	0.960655	1.00615	0.983419	1.07694	1.02962	1.01716	1.11673	1.04453	1.16159	1.81226	1.04426
536		3	64001..65000	0.938878	0.847382	0.909386	0.961927	1.00396	1.02591	1.01317	1.08498	0.914418	1.06466	0.955866	1.12593	1.07895	1.01678	0.935215	0.89628	0.870068	0.913815	0.932651	0.988694	0.833342	0.952947	0.849968	1.79507	1.67473	0.927516	0.936534	0.949384	0.968041	1.03478	0.989263	0.952375	0.906793	0.95615	0.954843	0.907389	0.953026	0.949742	0.927152	0.900047	0.877871	0.928986	0.877024	0.930506	1.36136	0.927206
537		3	65001..66000	0.616545	0.714272	0.749828	0.724079	0.691691	0.680876	0.732309	0.592733	0.778902	0.642467	0.741079	0.673109	0.674891	0.684771	1.00892	0.918228	0.930316	0.954338	0.946214	0.977478	1.02324	0.935064	0.935611	2.05955	1.89964	1.00001	0.934128	0.889059	0.965969	0.962217	0.891721	0.94458	0.910272	0.916065	1.01887	1.02727	0.763379	0.729889	0.641045	0.724373	0.736137	0.632733	0.644242	0.749119	0.891672	0.762426
538		3	66001..67000	0.871171	0.853998	0.866157	0.948598	0.938703	1.0366	0.962239	0.930213	1.01751	1.10287	1.11744	1.01094	1.08952	0.905818	1.06201	1.22081	1.04066	1.02457	1.0357	1.10347	1.17102	1.09369	1.20115	2.44148	2.21009	1.21346	1.10485	1.05061	1.00659	1.114	1.06127	1.12278	1.03442	1.06735	1.10592	1.1545	1.09877	1.06369	1.06534	1.10105	1.00779	0.982002	1.11912	1.10109	1.05796	1.03959
539		3	67001..68000	1.1748	0.93095	1.00088	1.12975	0.919004	1.07795	1.19397	0.989022	1.09029	1.08431	0.971568	1.12743	1.07884	0.978572	1.08628	1.01148	1.01362	1.06031	0.957672	0.946324	1.13468	1.03231	1.06369	2.47375	1.97535	1.02645	1.01472	0.986992	0.861683	0.97361	0.951807	1.05271	0.992507	0.942672	1.01384	0.928095	1.01595	1.01442	1.05992	0.978251	1.1895	1.05634	1.02107	1.01199	0.892291	0.967154
540		3	68001..69000	1.05376	0.995287	1.07739	0.977456	0.954341	1.05168	1.11949	0.902394	0.956866	0.949983	0.911887	0.871623	1.08823	0.853091	0.877372	0.92764	1.00024	0.947275	0.95549	0.974483	1.03268	1.01778	0.9497	2.1363	2.04529	1.01441	0.996357	0.965499	0.902405	0.943292	0.869483	1.00672	0.975947	0.928955	0.918056	0.878348	1.0731	0.981866	1.04375	0.995532	1.05707	1.01632	1.08459	0.999785	0.992475	0.947113
541		3	69001..70000	0.945203	0.96026	0.93461	0.849439	0.813225	1.09821	1.15725	1.0556	0.923461	1.05641	0.863244	1.04561	1.14908	0.97604	0.798637	0.938172	0.905109	0.890847	0.928623	0.927131	1.03742	0.865034	0.945524	1.94081	1.67522	0.936724	0.86436	0.961461	0.882	0.938977	0.877106	0.997927	0.936383	0.891581	0.864823	0.964817	0.975966	0.912649	0.974588	0.9873	0.940501	1.01146	0.974702	0.957029	1.23932	0.8998
542		3	70001..71000	1.01639	1.13139	1.09923	1.07917	0.99117	1.01469	0.999316	1.04099	1.06948	0.977957	1.15277	1.04282	0.970119	0.85092	0.956	1.08731	1.08396	1.10154	1.01499	1.04272	1.06832	1.00743	0.978326	2.04465	2.07433	0.990746	1.07527	1.05138	1.01878	1.06674	1.01006	1.07386	1.00208	1.11124	1.01938	1.01454	1.06697	1.01152	1.05069	1.04528	1.04715	1.00636	0.991497	0.962878	1.20296	0.97056
543		3	71001..72000	0.937034	0.995163	0.986743	1.05219	1.13639	1.00331	0.951808	0.915921	0.964071	0.970975	1.08696	1.03064	1.03973	0.957209	1.04673	1.15631	1.14105	1.04113	0.970331	1.1671	0.956976	0.98348	1.12651	2.25725	2.13002	1.09715	1.06921	1.00828	1.00543	1.00436	0.940537	1.06793	1.08341	0.995996	0.988111	1.13717	1.01548	1.11068	1.0325	1.04326	0.936566	1.00861	1.02469	1.01166	0.689158	0.983557
544		3	72001..73000	1.00725	1.05643	1.0273	0.994976	1.05384	0.992412	1.04473	1.06025	0.934163	1.11182	1.02766	1.02845	0.965158	0.922116	0.973967	1.10146	0.977612	0.919503	1.06889	1.0032	0.969716	0.945396	0.940938	2.07006	1.92388	1.05669	1.07796	1.0462	1.04112	1.00385	0.941051	1.03297	1.0035	0.929705	1.11226	1.09248	1.0043	1.10206	1.10927	1.07433	0.989423	1.04677	0.995334	0.998844	0.995337	0.971248
545		3	73001..74000	0.935932	1.07709	1.088	1.00559	1.04798	0.943191	0.971569	0.975325	1.06527	0.973291	1.08566	0.970573	0.971371	0.84375	1.07812	1.14727	0.985208	0.996701	1.07432	1.05622	1.03219	0.988833	1.08672	2.18547	2.15404	1.15358	1.04112	1.06942	1.09518	1.08442	0.952277	1.01557	1.07056	0.993506	1.13121	1.11528	1.10439	1.07974	1.06088	1.06309	1.04761	1.02789	1.13048	1.07268	1.32279	1.05976
546		3	74001..75000	0.961852	0.961484	0.880544	1.03507	0.94466	0.935292	1.06869	0.913757	0.912315	0.913863	0.985052	0.985767	0.914795	0.822841	0.953916	0.95855	0.982808	0.968499	0.870676	1.0206	0.858154	0.862326	0.933065	2.03202	1.79225	1.02594	1.02915	0.904233	0.881342	1.1162	0.81742	0.980806	0.99549	0.87598	0.946003	1.05922	0.970038	0.974694	1.10467	0.994915	1.05897	1.00553	1.10225	0.896616	0.922559	0.928529
547		3	75001..76000	0.967335	0.877882	0.876808	0.901922	0.885454	0.989849	1.04539	1.01148	0.845552	1.16538	0.910137	1.11833	0.97858	1.09098	0.922483	0.88556	0.967373	0.926613	0.837516	0.965033	0.927618	0.798233	0.861861	1.80373	1.67719	0.872835	0.903591	0.861878	0.903545	0.976422	0.771444	0.928507	0.878161	0.860192	0.851784	0.764454	0.991882	0.85476	0.979419	0.942368	0.967765	0.920075	0.950907	0.868445	1.14267	0.839283
548		3	77001..78000	0.838877	0.884442	0.928441	0.873709	0.801709	0.844083	0.786318	0.649815	1.00031	0.826313	0.801252	0.903656	0.910988	0.873981	0.858943	0.802103	0.74954	0.729615	0.782384	0.788039	0.84714	0.898172	0.844104	1.85279	1.72383	0.799981	0.698925	0.799965	0.853156	0.799377	0.700844	0.748024	0.863841	0.738421	0.733201	0.843073	0.895083	0.753018	0.782397	0.770207	0.741521	0.763421	0.826091	0.768397	0.693762	0.734296
549		3	78001..79000	0.975901	0.783259	0.825645	0.766711	0.880731	0.975372	1.02636	1.01917	0.857778	1.10039	0.837117	1.02677	0.925337	0.990798	0.88957	0.832589	0.85994	0.820138	0.890439	0.790772	0.921284	0.889158	0.926928	1.83358	1.82106	0.877358	0.863661	0.877346	0.846112	0.786646	0.79323	0.814702	0.903149	0.7994	0.776935	0.790581	0.890945	0.802752	0.889423	0.938636	0.886496	0.942173	0.899983	0.889725	1.02464	0.821289
550		3	79001..80000	0.924792	0.967124	0.965305	0.946893	0.90584	0.91603	0.947193	0.909885	0.971526	0.943594	1.08115	0.95683	0.999201	0.956606	0.97534	0.974536	0.989259	1.03436	0.964579	1.09862	1.1601	0.978158	0.995595	1.98292	1.93461	0.897742	1.08613	1.12718	0.940975	0.990987	0.922913	0.975606	1.01145	0.973319	0.80165	0.927738	1.02786	0.985693	0.981374	1.07991	1.01325	1.10027	0.966898	0.968782	1.04934	1.0445
551		3	80001..81000	0.869735	0.861132	0.95438	0.838449	0.887586	0.738127	0.588516	0.616899	0.707271	0.595743	0.766764	0.62122	0.703263	0.577796	0.867305	0.810764	0.915794	0.912715	0.783195	0.892918	0.922573	0.900337	0.862807	1.98418	1.92411	0.814544	0.792127	0.861435	0.767998	0.825501	0.760751	0.806925	0.914213	0.831616	0.719964	0.885178	0.845505	0.820302	0.908086	0.859615	0.810341	0.876686	0.849328	0.792489	1.01677	0.793525
552		3	82001..83000	0.82817	0.780226	0.725487	0.793676	0.802045	0.744644	0.575264	0.459178	0.722721	0.595817	0.750408	0.631323	0.596363	0.668426	0.751926	0.804313	0.795104	0.8253	0.740965	0.813991	0.883088	0.825337	0.876252	1.6558	1.57009	0.754468	0.740883	0.713586	0.68231	0.710384	0.598545	0.69271	0.710848	0.671192	0.744085	0.697362	0.720101	0.770507	0.724013	0.709959	0.76165	0.769611	0.766292	0.700385	0.788704	0.687259
553		3	83001..84000	0.836575	0.820061	0.832618	0.821572	0.902897	0.704555	0.737792	0.666746	0.834559	0.739032	0.752422	0.628014	0.637594	0.757591	0.792881	0.794261	0.694638	0.811008	0.727299	0.826257	0.824152	0.794078	0.757933	1.74532	1.69111	0.695761	0.727317	0.682404	0.662161	0.735467	0.587169	0.67039	0.723235	0.646188	0.729023	0.71889	0.799536	0.78384	0.808732	0.76695	0.788058	0.753088	0.783603	0.710824	1.14093	0.745335
554		3	84001..85000	1.02711	1.06499	1.12439	1.05257	1.02982	0.991948	1.07695	0.991962	1.1045	1.14234	1.14779	1.10823	1.12747	0.900094	1.09032	0.976266	0.991153	1.10692	1.02283	1.01552	0.975065	1.10326	1.02487	2.38056	2.13484	1.11213	1.07521	1.0524	1.05254	1.17643	0.948701	1.08195	1.04858	1.00879	1.06657	1.07198	1.12852	1.05069	1.14814	1.08932	1.09075	1.0799	1.11457	0.993023	1.1019	1.07636
555		3	85001..86000	0.0881556	0.082142	0.0896745	0.0763956	0.0937547	1.0047	0.982543	0.94347	0.920608	0.973486	0.998783	1.09996	1.13191	0.885855	1.15389	1.02646	1.0632	1.05818	1.09807	0.952326	1.17073	1.12363	1.09718	2.16638	2.15539	1.01597	1.09182	1.009	1.07647	1.07511	0.97187	1.06712	1.08645	1.01936	1.0882	0.966165	1.06632	1.10734	1.05115	1.17396	1.17968	1.08024	0.987167	0.973504	0.934666	1.10214
556		3	86001..87000	0.00617659	0	0	0	0	1.02612	1.00488	0.899245	0.959453	1.02962	1.00888	0.963127	0.997731	0.854492	0.912144	0.923729	0.987628	0.963539	0.967274	0.855698	1.03221	0.934921	0.935845	2.09965	1.89765	0.953041	1.01623	1.00181	0.883906	0.9623	0.878641	0.972246	0.957157	0.921223	0.913857	0.926687	1.0279	1.01514	0.969792	1.00421	1.01939	1.08862	1.03404	0.937751	1.01313	0.915514
557		3	87001..88000	0	0.00206703	0.00678639	0.00246757	0	0.876484	0.882862	0.830368	1.00783	0.841266	0.919296	0.901242	0.801317	0.790772	0.878449	0.900267	1.12313	1.00527	0.875878	0.962668	0.972901	1.00505	1.023	2.01796	1.90323	0.982359	0.983655	0.917695	0.964691	1.08899	0.872589	0.941621	0.987053	0.903687	0.885118	1.05785	1.02739	1.01477	1.05311	0.994734	1.00575	1.05296	1.00103	0.976055	1.52529	0.95523
558		3	88001..89000	0.560473	0.631231	0.604558	0.625673	0.706377	1.02619	0.873273	0.84973	1.23554	0.937211	0.95709	1.00776	0.944794	0.868332	1.05752	1.06265	1.01415	1.1524	1.08116	1.0467	1.0487	1.04438	1.11315	2.12267	2.11811	1.14512	1.00842	1.02572	1.03746	1.15465	1.00407	1.09407	1.09086	1.01484	1.03281	1.13598	1.08239	1.06485	1.08546	1.11085	1.11128	1.05114	1.08521	1.04921	1.50809	0.943109
559		3	89001..90000	1.07455	1.03399	1.06115	1.09377	1.16088	1.13226	0.945057	0.962116	1.04632	1.0845	1.11758	1.0364	0.951046	0.968006	1.16549	1.11394	1.2277	1.0515	1.10971	1.12004	1.09574	1.17266	1.13888	2.36512	2.17323	1.11177	1.10625	1.04982	1.00334	1.13498	1.0529	1.09637	1.17111	1.05474	1.16962	1.11714	1.08257	1.07471	1.11623	1.06871	1.11982	1.09854	1.04313	1.07674	1.02357	1.00842
560		3	90001..91000	1.17735	1.08403	1.06075	1.12227	1.12923	1.07521	0.896422	0.980121	1.16172	1.02986	1.13942	1.07923	1.08246	1.0955	1.15915	1.13639	1.07371	1.14987	1.11729	1.09028	0.948503	1.12815	1.03616	2.36681	2.28605	1.12023	1.15799	1.01893	1.06796	1.0292	1.10095	1.07764	1.09418	0.970668	1.14262	1.15963	1.12362	1.12753	1.06615	1.09702	1.10973	1.04756	1.03378	1.05704	1.16406	1.07128
561		3	91001..92000	0.9937	1.05141	1.1015	1.00412	1.00038	1.06064	1.04115	0.9341	1.20524	1.00337	1.07856	1.11605	0.883179	0.866096	1.26148	1.30796	1.34465	1.3591	1.28621	1.50243	1.42725	1.39245	1.37031	2.72947	2.70042	1.3428	1.2542	1.34607	1.24091	1.41328	1.22848	1.35567	1.31677	1.1798	1.29406	1.38139	1.21134	1.23808	1.16699	1.21461	1.22017	1.27619	1.1437	1.19949	1.2661	1.18694
562		3	92001..93000	1.0923	1.16037	1.09216	1.07497	1.12459	1.15471	1.12805	0.967876	1.13685	1.10304	1.01575	1.17246	1.27796	0.970845	1.03394	1.12346	1.10447	1.13027	1.05484	1.18176	1.1223	1.06865	1.13991	2.46324	2.18994	1.00374	1.1036	1.00405	1.0683	1.05165	0.97605	1.03304	1.12991	1.02594	1.06602	1.13739	0.986121	1.10165	1.10797	1.03022	1.07496	1.04404	0.984905	1.00011	1.08554	1.06278
563		3	93001..94000	1.05297	1.0492	1.07973	1.04217	0.965069	1.03338	1.01675	1.13722	1.07568	1.01178	1.09781	1.01247	1.07801	1.05395	0.890174	1.02132	1.01303	1.03518	1.13375	0.932313	1.12103	1.00176	1.05436	1.90018	1.94664	1.08035	1.11303	1.07828	1.04871	1.09942	1.0631	1.09181	1.13208	1.03002	0.999457	1.0653	1.03967	1.11448	1.0979	1.03498	0.996005	1.00503	1.05305	0.992213	1.00149	1.05092
564		3	94001..95000	0.917848	1.04481	0.960765	0.893459	0.921338	0.958402	1.00679	1.15159	0.99298	1.11665	0.974474	1.11131	1.04721	0.999184	0.881789	1.04387	1.02218	0.948446	1.07074	0.93514	0.943373	0.930869	0.948841	2.00837	1.86525	1.03371	1.05626	0.961488	1.06541	0.93883	0.859536	1.06201	1.00759	0.947079	0.995873	0.999042	1.02525	0.965679	0.994644	1.05385	0.903525	1.05827	1.05493	0.970607	1.18255	0.979088
565		3	95001..96000	0.936662	0.939297	0.876661	0.847001	0.964327	1.07842	0.958359	1.09028	0.863355	1.05271	1.07565	1.03933	1.06174	1.04798	0.823378	0.939922	0.858461	1.00307	1.08433	0.921581	0.968002	0.778887	1.02825	1.76956	1.69553	0.990847	1.03203	0.965969	1.07858	1.07195	1.06609	1.05943	1.04657	0.996482	1.01509	0.997367	1.03253	1.0642	1.03974	1.07713	1.00762	1.10871	0.995485	1.04705	1.50749	1.04759
566		3	96001..97000	0.854733	0.996017	0.895274	0.915459	0.801279	1.03671	0.902272	1.00145	0.834221	0.945849	0.986123	0.984181	1.0922	1.01379	1.03361	0.836765	0.906952	0.861449	0.942458	0.848341	0.897335	0.95914	0.995419	1.86484	1.82566	0.87466	0.90626	0.880505	1.00014	0.983723	0.95517	0.966336	0.997167	0.87535	1.0256	0.893929	0.932815	0.910705	0.9366	0.979504	0.98273	0.956885	0.862619	0.941672	1.19042	0.897484
567		3	97001..98000	0.967137	1.04738	1.03338	1.11651	0.944332	0.991651	1.12715	1.12566	0.940804	1.06485	0.977363	1.02616	0.976864	0.862358	0.984732	0.944369	0.971303	1.00711	1.06306	0.915768	1.07829	1.0851	1.0063	2.07759	1.97595	0.897944	0.958581	0.929054	0.928459	0.934414	1.04924	0.963914	0.926509	0.945195	0.865108	0.927827	0.91457	0.999716	0.99201	0.970341	1.03632	1.06818	0.950156	0.899699	1.03069	0.963784
568		3	98001..99000	0.887312	0.799346	0.929049	0.799998	0.875468	0.969162	1.05348	1.09322	0.83306	1.14884	0.980166	1.09449	1.0332	0.956977	0.985016	0.939404	0.935674	1.07587	0.995045	0.926448	1.02673	0.979069	0.889228	1.8801	1.93264	0.881627	0.924279	1.04746	0.904537	0.983824	1.00178	0.985615	0.961363	0.898742	1.07094	0.856018	0.92491	0.934245	0.942565	0.93781	0.911083	1.0358	0.96647	0.935991	1.12935	0.967744
569		3	99001..100000	0.994888	0.975291	0.87362	0.904766	0.874125	1.09507	0.929661	1.02405	0.791192	1.08832	0.910078	1.089	1.17536	1.00483	0.775708	0.905044	0.898556	1.03937	0.972662	0.829242	0.815922	0.908695	0.925338	1.93936	1.91731	0.877723	0.892762	0.867762	0.934668	0.857488	0.913693	0.909001	0.870807	0.806774	0.96388	0.898756	0.82547	0.882497	0.905327	0.891548	0.873946	0.908534	0.792638	0.860594	0.951841	0.873135
570		3	100001..101000	0.990259	1.0398	1.17286	0.945258	0.980778	0.997346	0.946033	0.990832	1.02946	1.04608	1.11411	1.00586	1.21017	0.888267	0.983548	1.118	1.02789	1.1103	1.02799	1.11971	1.02662	1.00533	1.08351	2.31404	2.07325	0.943133	1.006	1.06012	1.05917	1.11732	1.10739	0.977227	0.996506	0.952689	1.05595	0.919749	0.994465	0.998124	1.10085	1.02741	1.04637	1.03007	1.02948	1.02216	1.21574	1.00459
571		3	101001..102000	0.970108	1.01464	1.05178	0.960262	1.13008	1.14383	1.03973	1.06383	1.08635	1.07629	1.11646	1.01384	1.07588	0.994899	0.933924	1.10003	0.984853	1.10689	1.06188	0.943917	0.957426	1.01187	0.985916	2.29548	1.90349	1.02531	1.06709	1.05512	1.12247	1.08009	1.09918	1.01311	1.05589	1.02875	1.15964	1.02736	1.00057	1.03863	1.03101	1.09685	1.03235	0.992672	0.995742	1.07426	1.20969	1.07581
572		3	102001..103000	0.87533	0.948251	1.05136	0.927321	0.966529	1.06745	1.09155	1.092	0.859648	1.0422	1.02983	1.10608	1.01806	0.92527	0.921098	0.913291	1.02989	0.908461	1.00986	0.866209	0.946862	0.907097	1.05116	2.01599	1.78103	0.977278	0.897274	0.90757	0.950662	0.909442	1.09556	0.933989	0.895092	0.919773	0.901257	0.918709	0.925409	0.900408	0.97615	0.985458	0.97646	0.936843	0.933971	0.976735	0.951241	0.943448
573		3	104001..105000	0.914246	0.823117	0.887713	0.91755	0.951546	0.996803	1.0913	1.19423	0.746061	1.05063	0.918617	1.12809	1.01621	0.828907	0.898382	0.791524	0.713526	0.796417	0.931355	0.808777	0.907802	0.799815	0.765095	1.83379	1.61275	0.835719	0.862448	0.927527	0.946654	0.933032	0.913968	0.86202	0.880549	0.809502	0.821923	0.887398	0.840212	0.926803	0.991144	0.868294	0.865664	0.972415	0.894335	0.945081	1.0544	0.982869
574		3	105001..106000	1.0593	0.867625	1.07311	1.09185	1.11783	0.935108	1.04409	1.11395	0.979964	1.06087	1.096	1.02725	1.14687	0.879343	1.0297	1.13905	0.984033	1.03462	1.03174	1.06112	1.03491	0.995482	0.985331	2.16173	1.90591	0.951672	0.971487	0.991704	1.05031	0.987806	1.05176	1.02468	1.03523	0.921521	0.960626	0.960228	0.966056	1.04374	0.988108	1.03595	1.01715	0.926182	0.984412	1.00931	1.28641	1.02696
575		3	106001..107000	0.955588	1.06017	0.966982	0.923773	1.10745	1.00211	0.877971	1.0119	1.00018	1.09786	1.03206	1.08422	1.02088	0.963442	1.03631	0.97258	1.01601	1.01708	0.962053	1.02263	1.04849	1.0921	0.977701	2.15994	1.92727	0.891282	0.921436	0.989911	0.948324	0.926155	1.03813	1.05557	0.951439	0.879425	0.891406	0.997942	0.973697	1.09307	0.906372	0.960808	1.00132	0.928669	1.00854	1.05775	0.940758	1.02873
576		3	107001..108000	1.0366	1.02704	1.09604	1.07864	1.14496	0.788739	0.918712	0.912379	1.06928	0.743913	1.11366	0.806321	0.932674	0.709799	0.925859	0.967982	1.074	0.966539	0.947855	0.993529	1.04076	0.934849	1.07217	2.2641	1.86847	0.961458	0.989254	0.92877	0.955948	0.919002	1.02973	1.03442	0.911073	0.915119	1.19058	1.09526	0.959296	0.981035	0.907265	0.867468	0.927196	1.03267	0.983641	0.976893	1.2304	0.959726
577		3	108001..109000	1.11232	1.02973	1.07999	1.15988	1.17014	0.992123	0.862775	0.873527	0.909462	0.859848	0.954379	1.02879	1.01462	0.92784	1.03935	1.1287	1.20024	0.887166	1.09627	1.04516	1.01505	1.15708	1.05213	2.56976	2.22219	1.04025	1.01874	0.941087	1.02938	0.987041	1.14815	1.07147	0.991763	0.962168	0.982768	1.0504	0.978774	1.06417	1.06293	1.01136	0.993912	1.06146	1.08438	0.995296	0.96797	1.06635
578		3	109001..110000	0.953695	0.962596	0.911328	0.887741	0.922213	0.971655	0.928843	1.07195	0.897752	1.04744	1.02697	0.999346	0.992643	0.950298	0.786628	0.883792	1.02888	0.937954	1.06778	0.934247	0.986651	1.0074	1.04334	2.03226	1.80764	0.964267	0.99626	0.933295	0.908742	0.974615	1.08095	0.924273	0.876558	0.903712	0.96465	0.949801	0.91775	0.958667	1.03172	1.03148	0.876211	0.993378	1.00139	1.00178	0.906526	1.01187
579		3	110001..111000	1.21905	1.1523	1.15111	1.25225	1.23037	1.02032	0.990704	1.16645	1.11081	1.11642	1.11422	1.15136	1.15702	1.14414	0.969194	1.05081	1.07476	1.1135	0.983457	1.1647	1.10004	1.1354	1.13578	2.50819	2.25461	0.988373	0.975387	0.990816	0.951429	0.925574	1.12558	0.970534	0.977575	1.02031	1.22945	0.901938	1.05454	1.03638	1.02927	1.02011	0.995542	1.04214	0.980318	1.0808	0.950448	1.09427
580		3	111001..112000	1.28139	1.11564	1.15314	1.31862	1.3135	1.11219	1.15574	1.01327	1.17847	0.986177	1.21752	1.16407	1.04479	0.89399	1.05143	1.28393	1.19818	1.22813	1.0308	1.26082	1.35449	1.08511	1.09535	2.5109	2.30715	0.965626	1.01783	1.06152	1.1794	1.04407	1.18153	1.05554	1.09709	1.09307	1.08585	1.07653	1.05142	1.03922	1.0414	1.05164	1.04493	0.940004	0.977671	1.04824	0.933815	1.10543
581		3	112001..113000	1.08063	0.905674	1.06991	0.971985	1.00434	0.917019	1.12886	0.94612	0.901612	1.03454	1.1191	0.962319	1.04802	0.912951	0.912416	1.01018	1.06968	1.06942	1.05304	0.911522	0.961486	0.877947	0.886926	2.18441	1.97839	0.969632	1.06711	1.02038	1.14208	1.02954	1.14119	1.11098	0.991061	1.01552	1.15401	1.0984	1.05392	0.967071	0.973945	0.994336	1.01414	1.04143	0.974659	1.08259	1.00557	1.0778
582		3	113001..114000	0.939348	1.00766	1.15654	1.05601	1.03351	1.2562	0.99985	1.00664	0.993818	1.15941	1.04681	0.945607	0.981548	0.889278	1.11071	1.07253	1.08302	1.02974	1.01555	1.03815	1.13342	1.0675	1.04992	2.02935	2.02747	1.00555	1.03803	1.01759	1.00207	0.972827	1.10121	0.996069	0.874244	0.964931	1.0178	1.06543	0.939614	1.01319	0.973802	0.956117	1.00032	1.06828	0.920134	1.02386	0.98234	1.06366
583		3	114001..115000	0.981037	0.984963	0.951232	1.08649	1.00751	0.946174	1.0026	1.00206	0.916248	0.945439	0.954609	1.05983	1.12148	0.866041	0.828529	0.936574	0.908573	1.05676	0.926544	1.00591	0.961	0.849668	0.980463	1.93842	1.8732	0.945121	0.927879	0.916506	0.922231	0.905368	0.970326	0.942877	0.910222	0.939901	1.03281	0.937025	0.949484	0.979682	0.932313	0.915135	0.923553	1.01459	0.901923	0.983571	0.949694	0.97511
584		3	116001..117000	1.24783	1.20952	1.19249	1.12963	1.26348	1.13492	1.05634	0.966387	0.954449	1.03831	1.06529	1.03887	1.04413	0.981188	0.851979	1.00321	0.945204	0.914807	0.834254	0.988462	0.890795	0.928081	0.887189	1.73022	1.54543	0.824736	0.85225	0.857086	0.807021	0.860853	0.86171	0.813373	0.812122	0.788318	0.896222	0.868476	0.899642	0.94871	0.938127	0.949166	0.912321	0.895664	0.91948	0.933766	1.07268	0.827126
585		3	181001..182000	0.927144	1.02092	1.01895	0.915964	0.941084	1.10823	1.14115	0.974104	0.971268	0.910449	1.054	0.920008	0.886226	1.05418	1.09696	0.937326	0.940434	1.08902	0.90845	0.893906	0.925636	1.17235	0.988707	0.924849	0.994109	1.03819	0.949731	1.03437	0.94969	1.0157	0.900498	0.955353	0.988408	1.00899	0.836831	1.09148	1.07153	1.06855	0.997725	0.96434	1.07722	0.933682	1.03811	0.985592	0.841271	1.05761
586		3	182001..183000	0.974898	1.10192	1.00759	1.11934	1.04999	1.14582	1.09533	1.12263	0.985856	0.992553	1.19612	1.02415	0.939636	0.984416	1.11958	1.0426	1.02966	1.18544	1.14708	0.955868	1.02234	1.136	1.00625	0.979463	1.10677	1.08679	1.15416	1.10483	1.17287	1.09754	0.9528	1.11441	1.11138	1.1623	1.10456	1.12896	1.13199	1.06393	1.0983	1.09466	1.12279	1.051	1.08444	1.08203	0.900878	1.08645
587		3	237001..238000	1.01992	1.25079	1.22663	1.2257	1.11903	0.907843	1.0308	1.13149	1.16147	1.02488	1.19502	1.11681	1.06532	0.989444	1.28608	1.19811	1.22983	1.03771	1.17844	1.16328	1.08914	1.14572	1.09974	1.20311	1.14162	1.08285	1.17953	1.09791	1.10147	1.03565	1.01455	1.15683	1.09539	1.19762	0.997192	1.08314	1.1175	1.1336	1.04421	1.11503	1.18396	1.09397	1.09435	1.14187	0.712232	1.08551
588		3	257001..258000	1.17976	1.225	1.0572	1.25626	1.16908	1.07965	1.14145	1.06069	1.13414	1.02939	1.11981	1.05911	1.02691	1.09422	1.21672	1.35206	1.2109	1.24252	1.16648	1.1894	1.10669	1.34013	1.06292	1.19979	1.23073	0.910854	1.13022	1.13982	1.10312	1.05913	1.23855	1.11396	1.02609	1.18851	0.995015	1.11967	1.19438	1.11512	1.13396	1.14827	1.17746	1.14222	1.04305	1.1084	0.934183	1.13468
589		3	258001..259000	1.26582	1.24866	1.09329	1.27404	1.02049	1.07543	1.03003	1.03541	1.2831	1.09631	1.12927	1.12715	1.09035	1.05402	1.17114	1.10672	1.27199	1.2273	1.19206	1.21252	1.1915	1.30037	1.11643	1.38813	1.21489	0.94724	1.1343	1.16614	1.12971	1.08295	1.17871	1.16734	1.16794	1.1445	0.945432	1.20354	1.14772	1.1499	1.0756	1.06576	1.09528	1.14643	1.01995	1.16984	0.840498	1.17053
590		3	259001..260000	1.25746	1.24008	1.17005	1.25702	1.22111	1.06544	1.11383	1.13371	1.13443	1.10133	1.02291	0.923084	1.15782	1.09008	1.1624	1.28478	1.32215	1.26804	1.14498	1.31336	1.1743	1.25616	1.2655	1.20135	1.16938	1.04103	1.03176	1.09492	1.1133	0.985963	1.16317	1.11401	1.07011	1.12251	1.06083	1.17	1.0545	1.0044	1.03885	1.0518	1.14398	1.13636	1.07933	1.07639	1.2509	1.09751
591		3	333001..334000	1.08871	1.03049	1.02618	1.08956	0.948158	1.11973	1.0598	1.26551	0.994221	1.04414	0.948729	1.16878	1.06066	0.891189	1.02692	0.990475	0.974007	0.998434	1.07703	0.863245	0.96613	0.905962	0.979506	1.01814	1.04054	1.08352	1.08295	1.051	1.0409	0.96548	1.05125	1.03977	1.08428	1.09125	1.01285	0.935628	1.12027	0.970507	1.04695	1.13734	0.989192	1.04847	1.0253	1.09667	1.73726	1.09432
592		3	440001..441000	0.910471	1.01892	0.905866	1.08093	1.13311	0.863809	1.04928	1.07085	1.09927	1.0784	1.05729	1.08949	0.869086	0.938359	0.805612	0.949993	0.85593	0.817293	1.12206	1.00318	0.978785	0.965916	0.897365	0.96314	0.980359	1.07918	1.10306	1.05426	0.965978	1.07979	0.964363	1.08172	1.10004	1.06968	1.14825	1.1353	1.07889	1.09373	1.0927	1.08625	1.0494	1.08217	1.16106	1.06865	0.964006	1.09032
593		3	441001..442000	0.886482	1.01722	0.951713	1.00756	0.892161	1.07081	1.09602	1.06967	0.98779	1.08004	0.983956	1.05027	1.04272	0.963823	0.924141	0.845444	0.897999	0.860457	1.0099	0.863834	0.899511	0.931205	0.854329	0.859087	0.934848	0.969804	0.988953	0.960379	0.931249	1.03832	0.954078	1.072	1.09051	1.10951	0.995763	1.04973	0.993232	1.0147	1.00354	0.994127	1.00014	1.07329	1.03107	0.99252	1.28392	0.998449
594		3	470001..471000	0.964538	1.03526	0.995246	0.999812	0.953256	1.09448	1.09254	1.2042	0.881706	1.11991	1.06291	1.23998	1.01912	1.04357	1.03128	1.00595	0.956324	0.970016	1.03405	0.972727	0.904009	0.89575	0.852465	1.00453	0.891471	0.979367	0.957552	0.985953	1.0534	1.04331	0.928539	1.01265	0.95091	0.977914	1.03218	1.02487	1.01813	0.982497	0.998538	1.02586	1.05147	1.08355	1.04878	1.04786	1.47115	1.00763
595		3	503001..504000	0.899888	0.92111	0.904904	0.946883	0.976882	1.10088	1.04427	1.02177	0.907769	1.07517	0.990949	0.861802	0.949774	0.870939	0.8913	0.908363	0.997563	1.02356	0.927672	0.955353	0.980755	0.92852	0.916976	0.868631	0.869879	0.958264	0.932896	0.911971	1.00378	0.973693	0.997942	0.982418	0.965189	0.957769	0.953853	1.02552	1.01367	1.03748	0.951807	1.03415	0.935217	0.981367	1.11209	1.03408	0.816013	1.06441
596		3	564001..565000	0.971618	1.05426	0.988489	0.968021	0.871197	1.05464	1.08711	0.968559	1.0508	1.16533	1.0582	1.09693	1.05142	1.00423	0.956273	0.926465	0.866594	0.997633	1.11209	1.04021	0.966884	0.931564	0.964237	1.01026	0.940432	1.09802	1.04915	1.07681	1.12216	1.06519	0.912593	1.07893	1.0735	1.06281	1.19542	1.12843	1.04373	1.01315	1.11517	1.06104	1.07632	1.03722	1.03447	0.996842	1.18814	0.996653
597		3	572001..573000	0.822885	1.02248	0.941573	0.857932	0.904091	0.937837	1.00562	1.09364	0.868319	1.05694	0.996064	0.988785	1.05603	0.939639	0.863669	0.932878	0.938175	0.983173	1.03756	0.989429	0.92188	0.818633	1.10066	0.888588	0.733715	0.939746	1.03435	0.983557	1.00077	0.978717	0.905973	0.984221	1.00672	1.04608	0.87032	0.931812	1.01663	0.958186	0.917766	1.00019	0.961646	0.897107	0.977885	1.03379	1.31902	1.04628
598	clade II unique CNV	3	583001..584000	2.51501	2.59869	2.42061	2.68467	2.50314	1.03265	0.989703	0.87537	1.04102	1.01317	1.13225	1.0414	0.905377	1.03214	3.75097	3.921	3.81282	3.671	3.74782	3.62901	3.74865	3.95946	3.53575	3.81769	3.99946	5.62939	3.58423	3.75169	3.70087	3.65565	3.74397	3.63802	3.77483	3.94238	3.57046	3.5066	1.62597	1.68729	1.66108	1.66606	1.73737	1.67109	1.74517	1.68239	1.50979	1.64237
599		3	584001..585000	1.87841	1.89463	1.88803	1.89175	1.6978	0.907213	0.977895	0.833757	1.02709	0.966437	1.10328	0.852818	0.900515	1.02305	2.0265	2.07797	2.17967	1.94751	2.07135	2.00873	2.09222	2.07887	1.95179	2.06072	2.25344	2.73816	1.96809	2.08164	1.87566	1.86036	2.08669	2.04727	2.026	2.12796	1.83202	1.90608	1.25095	1.19775	1.23968	1.18535	1.25169	1.14454	1.22169	1.17424	0.847286	1.18878
600		3	588001..589000	1.01503	0.952025	0.905542	0.926628	1.00743	0.983446	1.11439	1.06019	0.840741	1.09103	0.998698	0.956168	0.986795	0.960752	0.8692	1.00441	0.950359	0.81231	1.0127	0.894631	0.886929	0.942839	1.00213	0.852662	0.858218	1.0528	0.979036	0.86927	0.964043	0.946979	0.948869	0.930711	0.990119	0.895443	0.946861	0.872491	0.991247	0.917467	0.977713	0.957798	0.994566	0.981889	0.959278	0.956992	1.29488	0.999862
601		3	591001..592000	0.979651	0.859492	0.9605	0.969746	1.0401	0.819425	0.826508	0.841647	0.963249	0.940153	0.877646	1.00138	0.931086	0.835429	0.904671	1.02804	1.00274	1.00492	0.947277	0.860596	0.922828	0.938636	1.01935	0.967463	0.920596	1.01136	0.948693	0.872758	0.967796	0.986875	1.00284	1.0277	1.01825	0.982407	0.940111	0.92298	0.972669	0.960129	0.91348	0.844575	0.910479	0.907747	1.0057	0.950994	1.17768	0.878892
602		3	595001..596000	1.01504	0.972493	1.11885	0.950659	0.99274	0.957624	1.11772	1.12946	0.974274	0.997185	1.02008	1.14847	0.979221	0.972329	0.956734	0.999878	0.881613	0.959632	1.08982	0.917934	0.990225	0.839081	0.939221	0.949265	0.908742	1.03246	1.07546	1.03087	1.10496	1.07101	1.05686	1.08499	1.03129	1.09126	1.10735	1.07107	1.04457	0.986254	0.999859	1.10383	1.05204	0.954808	1.03722	1.06411	1.5618	1.01445
603		3	667001..668000	1.06069	1.03532	0.945741	0.91868	0.808876	1.13146	0.998156	1.08261	0.969818	1.04492	0.94064	1.04202	1.04026	0.999583	0.879077	0.891512	0.834277	0.926996	0.940705	0.867733	0.991902	0.872657	0.869715	0.87019	0.958477	0.967015	0.9177	0.923357	0.880123	0.848077	0.896114	0.935556	0.982393	0.855895	0.911416	0.816569	0.888196	0.89566	0.944672	0.848003	0.933245	0.92874	1.03615	0.996497	1.05003	0.934018
604		3	669001..670000	0.843803	0.881016	0.980683	0.94283	0.867161	1.05527	1.03598	1.0823	0.82459	1.09383	0.850405	1.0289	0.995798	0.932061	0.903676	0.881808	0.878676	0.931692	0.914882	0.923368	0.928991	0.973627	0.940294	0.883938	0.948098	0.958142	0.910539	0.991357	0.929245	0.919453	0.833686	0.973321	0.95838	0.870124	0.960076	0.883502	1.02148	0.89576	0.952174	0.899971	0.920342	0.96288	0.988196	0.899857	0.956231	0.909203
605		3	695001..696000	0.784835	0.812568	0.802324	0.800008	0.84145	0.777	0.836538	0.811572	0.756965	0.868627	0.926731	0.865121	0.907912	0.809102	0.878189	0.753252	0.671507	0.785255	0.903742	0.819246	0.853875	0.766861	0.73722	0.645408	0.803074	0.975645	0.85062	0.841539	0.944011	0.921113	0.826294	0.889285	0.880185	0.936985	0.892396	0.930295	0.858144	0.904345	0.812974	0.845163	0.93248	0.873218	0.908033	0.870121	1.37667	0.868648
606		3	726001..727000	1.25577	1.24999	1.29637	1.40959	1.29668	1.01911	1.07116	0.871827	1.44254	0.951558	1.21054	0.921663	1.12494	1.02097	1.3689	1.36776	1.25057	1.25509	1.18386	1.38566	1.39978	1.50049	1.32131	1.24315	1.22545	1.08565	1.11041	1.18665	1.275	1.12292	1.14164	1.12274	1.13275	1.27371	1.24254	1.24518	1.22763	1.25366	1.1472	1.13794	1.14777	1.18588	1.16042	1.26042	0.637191	1.31773
607		3	736001..737000	0.980196	0.850864	0.955057	0.863303	0.839256	0.964753	1.02618	1.06249	0.836236	1.02358	0.88333	0.970252	1.01775	1.0325	0.892472	0.761395	0.851109	0.863564	0.798353	0.878181	0.830838	0.861646	0.902029	0.835351	0.826194	1.04376	0.975911	0.938185	0.897375	0.836167	0.781277	0.877055	0.914444	0.918213	0.885953	0.826471	0.892667	0.944984	0.839638	0.916265	0.925787	0.938214	0.914807	0.955157	1.05392	0.948392
608		3	742001..743000	0.839879	0.956575	0.97927	0.939738	0.942036	1.08841	0.977019	0.818606	1.14239	0.922683	1.08438	0.92395	0.898878	0.826542	1.07254	1.02066	0.879223	0.982038	0.895716	1.03145	1.05433	1.01445	1.04067	1.04232	1.02085	1.08113	1.00022	0.990781	0.943107	1.04764	0.860494	0.9823	0.968395	1.04987	0.964364	1.07338	0.92312	1.0298	0.985607	1.01233	0.941055	1.01339	1.01054	0.959013	0.898654	0.930389
609	clade I unique CNV	3	794001..795000	0.525096	0.582925	0.544775	0.47636	0.592463	1.04168	1.10501	0.950288	0.903135	1.02088	1.02065	1.02282	1.0112	0.976745	0.431752	0.440415	0.417103	0.450078	0.509884	0.452991	0.385428	0.420555	0.499402	0.429335	0.411056	0.549121	0.547569	0.550706	0.511642	0.554181	0.453528	0.534784	0.516011	0.533888	0.531458	0.534266	1.8537	1.81071	1.72319	1.89278	1.77943	1.86105	1.73222	1.9232	1.97658	1.74385
610	clade I unique CNV	3	795001..796000	0.460966	0.401408	0.399603	0.332161	0.48905	1.12236	0.953861	1.07071	0.908729	1.05059	0.960811	1.1389	0.984389	0.971439	0.217362	0.267672	0.18582	0.161781	0.28778	0.212196	0.213192	0.233942	0.210284	0.212275	0.207376	0.291922	0.247847	0.331547	0.289631	0.293149	0.258426	0.294033	0.273445	0.237055	0.325229	0.277793	2.20995	2.24948	2.26758	2.23592	2.14433	2.31466	2.22937	2.33351	2.4801	2.22939
611	clade I unique CNV	3	796001..797000	0.747478	0.731482	0.717347	0.823604	0.64137	1.0347	1.01869	1.11801	0.924791	1.05892	1.06589	1.04879	0.97644	1.03254	0.817172	0.671469	0.779456	0.673999	0.661101	0.752523	0.723142	0.641297	0.678046	0.663371	0.709225	0.717351	0.711549	0.676005	0.706734	0.772349	0.66123	0.692182	0.707014	0.654927	0.632868	0.656635	3.04247	3.17452	3.04066	3.33517	2.99805	3.12499	3.07297	3.14117	4.22846	3.11591
612	clade I unique CNV	3	797001..798000	0.739618	0.748322	0.768853	0.705428	0.814287	0.993348	1.03367	0.953746	0.930771	1.15106	0.992843	1.07976	1.0102	0.971986	0.461088	0.442004	0.352753	0.381902	0.487846	0.420891	0.410678	0.383399	0.365444	0.366401	0.40605	0.457536	0.519817	0.415636	0.497907	0.531993	0.458595	0.493213	0.50612	0.487435	0.431213	0.456549	1.68127	1.73701	1.54475	1.73309	1.65034	1.62079	1.69559	1.59299	2.00328	1.65676
613		3	798001..799000	1.10041	1.16848	1.20861	1.10674	1.22499	0.852542	0.861899	0.785619	1.10949	0.807677	1.01347	0.971264	0.821731	0.916031	1.00956	1.03367	0.935289	1.14626	1.00553	1.11967	1.05039	1.01641	1.06664	1.04522	1.0519	1.13271	1.02494	1.06592	1.06063	1.10572	0.917926	0.975861	1.03847	1.01977	1.02723	1.07975	1.20731	1.34349	1.26322	1.26098	1.26327	1.15955	1.29411	1.2526	1.49513	1.30391
614		3	800001..801000	0.959834	1.03859	1.01539	1.00839	1.00051	0.978259	1.05975	0.979709	0.881827	1.04596	1.07805	1.11954	1.17215	1.00568	1.10902	1.0961	1.14447	1.02931	0.974675	1.10111	1.05425	0.940929	1.1098	0.979418	0.932828	1.09467	1.09502	1.11572	1.01664	0.988747	0.962464	1.05406	1.05662	1.10266	0.968454	0.978733	1.08703	0.955311	1.05507	1.04559	1.02997	1.04388	1.04382	1.09314	0.984023	1.0251
615		3	848001..849000	0.833208	0.974336	0.791801	0.869309	0.86136	1.00821	1.02207	1.04466	0.715524	1.07627	0.869345	1.01177	1.08901	0.920845	0.767228	0.794073	0.885391	0.804232	0.892378	0.873861	0.772534	0.731759	0.842816	0.759466	0.770875	0.897174	0.935554	0.829009	0.777714	0.889697	0.737511	0.928817	0.892216	0.738676	0.837865	0.812238	0.900043	0.867983	0.986563	0.901443	0.989202	0.950665	0.926254	0.77743	1.25703	0.878507
616		3	852001..853000	0.847343	0.853336	0.854311	0.740024	0.817605	1.08658	1.00012	1.10853	0.711374	1.03115	0.805637	0.953151	0.975681	0.960743	0.716337	0.761734	0.756882	0.763386	0.800348	0.834203	0.775598	0.774253	0.700457	0.720522	0.715056	0.850454	0.75898	0.831219	0.776663	0.890213	0.751602	0.849726	0.847058	0.775291	0.837909	0.771878	0.907732	0.80159	0.831387	0.771413	0.906635	0.857892	0.864934	0.757743	1.04108	0.74909
617		3	925001..926000	0.976717	1.01837	0.945368	0.956843	1.00551	0.957711	1.11392	1.00242	1.08688	1.01012	1.09207	1.05531	1.09278	1.04279	1.1654	0.984993	1.01076	1.03041	1.03308	1.06009	1.02473	0.971366	1.08063	0.983541	1.00023	1.0238	1.05654	1.00386	1.03252	1.10857	1.01958	1.04729	0.993242	1.05188	1.08499	0.9645	1.02759	1.09177	1.11327	1.03481	1.03624	1.04743	1.03674	1.02767	1.15097	1.05678
618		3	1228001..1229000	1.03773	1.03837	0.973916	0.963116	1.1458	1.02224	1.02553	0.935795	1.04122	1.02896	1.08843	1.09472	1.03444	1.08777	0.995758	0.996794	0.969723	0.996952	1.09429	1.07582	1.00402	0.944901	0.978638	1.00336	0.996357	1.08449	1.11828	1.08134	1.08155	1.13291	1.02235	1.07087	1.07458	1.11853	1.14271	1.0599	1.1218	1.10006	1.10682	0.996482	1.02132	1.08064	1.20182	1.16348	1.14474	1.09247
619		3	1234001..1235000	0.978525	1.0686	0.952821	1.05219	1.04447	0.993374	1.14643	0.966352	1.01817	1.15543	1.05767	1.03642	1.01546	1.00836	1.03469	1.00505	0.9838	1.05317	1.06926	0.944106	1.04596	0.975265	1.04808	1.09055	1.01602	1.07488	1.06183	1.06789	1.09234	1.14592	1.09591	1.0948	0.998365	1.13951	1.09915	1.07949	1.05005	1.07188	1.05297	0.990281	1.0592	1.09884	1.15867	1.0555	1.1618	1.03664
620		3	1237001..1238000	0.806187	0.867479	0.943975	0.798135	0.840255	1.01788	1.14356	0.989933	0.899702	1.07766	0.972001	0.975664	1.07113	0.848397	0.865386	0.848773	1.07441	0.885015	0.94861	0.79896	0.854811	0.988913	0.98217	0.876144	0.975099	0.984286	0.978716	0.992263	0.896628	1.00127	1.02034	0.932086	0.98754	1.08372	1.06023	1.02535	1.07984	0.949671	0.928732	0.96828	0.995935	0.940976	0.991251	0.956284	1.07454	1.01657
621		3	1249001..1250000	1.03311	1.04291	1.16838	1.10376	1.08609	0.983394	1.04467	1.00213	0.994946	1.08034	1.05703	1.08664	1.09822	0.975613	1.07404	1.02492	1.14446	1.07417	1.05996	1.10537	1.03429	1.02253	1.04112	1.15815	1.10492	1.02554	0.943065	1.07231	1.04209	1.01031	1.10561	1.05772	1.05383	1.14078	1.08517	1.07961	1.05274	1.00317	1.05625	1.02172	0.989916	1.01783	1.03445	1.08379	0.703761	1.06709
622		3	1287001..1288000	1.1175	1.11881	1.06483	1.11571	1.00202	1.15848	0.898634	1.03656	1.03755	1.13229	1.05842	1.11648	1.07332	1.02189	1.04294	1.05019	0.989482	0.959548	1.05268	1.02484	1.10626	0.937781	1.03889	1.10365	1.01803	1.07038	1.11699	1.04887	1.05073	1.08749	1.05485	1.00763	0.9923	1.1209	0.985582	1.005	1.05609	0.987976	1.07594	1.0677	1.02603	0.977469	1.00053	1.09235	1.00416	1.01487
623		3	1294001..1295000	0.908441	1.10205	0.967541	0.969082	0.943824	0.857143	1.00216	1.0327	0.825549	1.00988	1.09156	0.827657	1.00198	0.81644	0.943813	1.11782	1.01239	0.874009	1.10537	0.914444	0.955894	0.946827	0.950539	0.89301	0.913124	1.04396	1.07821	1.0331	1.08026	1.13654	1.12181	1.07784	1.07855	1.06353	1.04814	1.00636	1.01778	1.05746	1.09329	0.972117	1.0198	1.06631	1.02607	1.0429	1.4813	0.988402
624		3	1357001..1358000	1.02743	0.822634	0.91531	0.8471	0.769104	1.1287	0.977386	0.982686	0.780385	0.951855	0.888581	1.15226	0.999309	0.87502	0.875441	0.814939	0.797078	0.834908	0.96031	0.789805	0.829367	0.893329	0.877589	0.792537	0.801011	0.915397	0.943084	0.92617	0.855464	0.881677	0.853129	0.961628	1.01883	0.897966	0.888614	0.785516	0.823631	0.903653	0.965158	0.885633	0.988799	0.952148	0.921913	0.953136	0.940391	0.940865
625		3	1522001..1523000	0.993131	0.956631	0.878092	0.995957	0.973978	0.711325	0.694081	0.730504	0.794739	0.690793	0.568673	0.656552	0.736506	0.763453	1.035	0.817036	0.891457	0.920829	0.806855	0.84957	0.845134	0.954194	0.949758	0.912895	0.922607	0.84015	0.759086	0.765614	0.763224	0.76503	0.796904	0.86508	0.768897	0.775061	0.82443	0.826104	0.811833	0.909443	0.806419	0.882376	0.85886	0.796282	0.75969	0.8288	0.659761	0.834689
626	TWCC50952 uniqe CNV	3	1577001..1578000	1.13628	1.04749	0.977897	0.948697	0.96325	2.0962	1.11202	1.05983	1.0664	0.917909	0.99241	1.04295	1.06401	0.967849	1.01873	1.01138	0.97508	1.06425	0.943464	0.870834	0.891464	0.913705	0.957349	0.924885	1.00545	0.874366	0.860575	0.925992	1.08084	0.903976	0.974515	0.897772	0.956777	0.937744	0.951632	0.818096	0.961507	0.901319	1.01158	0.90318	0.984965	0.879336	1.01726	0.984707	0.888017	0.977711
627	TWCC50952 uniqe CNV	3	1578001..1579000	1.08436	1.24675	1.15002	1.16013	0.991678	2.20677	1.06437	1.05703	1.24521	1.08047	1.00797	1.02865	1.17082	0.85784	1.13698	1.12583	1.16679	1.17255	1.10828	1.19806	1.21482	1.1128	1.12317	1.02199	1.12383	1.01431	1.10832	1.17346	1.17905	1.09478	1.2096	1.14372	1.10015	1.15982	0.987825	1.07954	1.17752	1.1674	1.09808	1.18576	1.13084	1.0886	1.13291	1.07558	0.928767	1.0904
628	TWCC50952 uniqe CNV	3	1579001..1580000	1.25866	1.09913	1.12257	1.28101	1.1481	2.05809	1.15096	1.02891	1.23609	1.02022	1.15186	1.08222	1.17448	1.00268	1.12909	1.20952	1.17174	1.01929	1.08354	1.32315	1.21319	1.27657	1.23473	1.21465	1.17676	1.11638	1.07573	1.17598	1.20095	1.10852	1.13809	1.06471	1.10244	1.06713	1.14891	1.05369	1.02619	1.13343	1.14374	1.0039	1.09805	1.08688	1.23346	1.11778	0.815452	1.04827
629	TWCC50952 uniqe CNV	3	1580001..1581000	1.08968	1.14456	1.00887	1.0919	1.2485	2.15375	1.15942	0.966844	1.18028	1.0871	1.13579	1.13663	1.11073	0.950428	1.2513	1.11544	1.11127	1.17868	1.05661	1.00139	1.07561	1.10061	1.17947	1.08425	1.00063	0.941571	1.08907	1.13018	1.10029	1.0523	1.18602	1.08595	1.05873	1.04209	1.05863	1.11146	1.04757	1.11679	1.06661	1.13918	1.09208	1.08606	1.03582	1.12854	0.86624	1.09894
630	TWCC50952 uniqe CNV	3	1581001..1582000	1.09332	1.16466	1.21699	1.12988	1.16025	2.07266	1.12839	0.963784	1.12684	1.08896	1.01015	1.16744	1.10441	1.10096	1.15122	1.15985	1.22629	1.02495	1.0111	1.13036	1.1255	1.08526	1.19708	1.05106	1.05374	0.958984	0.991835	1.09517	1.06128	1.04085	1.06057	1.02026	1.03013	1.04207	1.09379	1.18903	1.04754	1.01843	1.05098	1.11571	1.0092	1.07246	1.05812	1.04592	0.946367	1.00671
631	TWCC50952 uniqe CNV	3	1582001..1583000	0.902895	1.18157	1.05387	0.925627	0.9151	1.75974	0.841537	0.793286	1.00255	0.829524	1.0202	0.797999	0.89665	0.754363	1.00979	0.903314	0.977713	0.914998	0.981052	0.944138	1.06239	0.960922	0.946012	0.994045	0.983151	0.950952	0.868028	0.958737	0.932595	0.89343	0.998013	0.909584	1.01422	0.940506	0.922498	1.10058	1.01878	1.07766	0.995814	1.03228	0.969476	1.04794	1.0755	1.017	0.958204	0.959011
632	TWCC50952 uniqe CNV	3	1583001..1584000	0.89225	0.993534	1.08974	0.971708	1.022	2.02426	1.12251	1.04873	0.998525	1.08292	1.03466	1.07716	0.998136	0.826987	1.06828	1.07907	1.04839	1.16613	1.02998	1.0877	1.11853	1.10581	1.0905	1.15823	1.04076	1.02282	1.03119	1.11533	1.0329	1.07047	1.06268	1.07264	1.04505	0.964845	1.0813	1.06942	1.03127	1.05973	1.0227	0.964805	0.999045	1.01349	1.01457	1.03832	0.962149	1.0568
633	TWCC50952 uniqe CNV	3	1584001..1585000	1.0112	1.16719	1.08961	1.13426	1.03644	2.14296	1.08864	1.01589	1.04715	1.09159	1.05453	0.927736	1.0151	1.08134	1.0256	1.09806	1.23104	0.866695	1.05963	1.16612	1.12451	1.1373	1.07077	1.15578	1.08177	1.11643	1.03991	1.1572	1.00047	1.07626	1.04456	1.04189	1.04837	1.03699	0.956404	0.880043	1.10673	1.07094	1.06397	1.12697	1.08303	1.0842	1.14828	1.09555	1.03953	1.10273
634	TWCC50952 uniqe CNV	3	1585001..1586000	0.966147	0.980593	1.09482	1.05667	1.00825	2.12716	0.928684	0.870573	0.984195	0.970814	0.973853	1.08417	1.06106	1.0126	1.09283	0.979708	1.04359	0.928645	0.993544	1.0044	1.09094	1.05565	1.09011	0.990248	1.02089	1.05623	1.09467	0.97889	0.94631	1.04927	1.00207	1.04283	1.0567	0.963788	1.09284	1.09507	0.989173	1.1169	1.0199	1.09424	1.01434	1.01049	1.03257	0.992642	0.910104	1.05424
635	TWCC50952 uniqe CNV	3	1586001..1587000	0.850351	0.951598	0.918566	0.988743	0.881488	1.94577	0.886851	0.881384	0.866442	0.965252	0.940079	0.849246	0.894312	0.909343	0.878781	0.903314	0.952769	0.746943	1.00137	0.918827	0.837415	1.00325	0.909815	0.929081	0.972807	0.906108	1.0107	0.99386	1.01438	0.999993	0.968019	1.01476	0.936301	0.927881	0.918804	1.02123	0.911538	0.948319	0.940002	0.961833	1.04339	0.99168	1.03526	0.931074	0.907493	0.959976
636	TWCC50952 uniqe CNV	3	1587001..1588000	1.02799	1.10131	1.01566	1.02153	0.980848	2.05835	1.02372	1.02525	1.02375	1.04147	0.967931	0.934365	0.968452	1.00488	1.02179	0.917014	0.957549	1.00232	1.03131	0.935792	0.987562	1.06643	1.05556	1.01268	0.989833	0.963375	1.02908	1.03104	1.01627	1.06827	0.972456	1.06014	1.01975	0.983771	0.930854	0.918153	0.952664	0.981736	1.00303	1.06262	1.03597	0.933508	1.01319	1.01445	1.08775	0.930192
637	TWCC50952 uniqe CNV	3	1588001..1589000	1.00922	1.18333	0.971082	1.02584	1.01687	1.90752	0.921048	0.813056	1.0806	0.852287	0.927895	0.946094	0.824176	0.954732	0.919807	0.910667	1.04523	0.950179	0.927533	0.972465	0.930377	0.974147	0.995468	1.06471	1.1042	0.953213	1.0133	0.896948	0.950397	1.03972	0.957033	0.917789	0.930566	0.941444	1.06171	0.957076	0.9992	0.970096	1.00922	1.01145	1.03855	0.993521	1.01136	0.982565	0.969402	0.941714
638	TWCC50952 uniqe CNV	3	1589001..1590000	1.01191	0.978897	1.05506	1.10198	0.871338	2.19168	1.14621	1.13788	1.02145	1.04412	0.949961	1.00595	0.980513	0.99706	0.911386	0.938633	1.03593	0.984046	1.01642	0.995336	1.21928	0.907057	0.974462	0.963276	0.857831	1.00856	1.06746	1.0554	1.02971	1.02605	0.998829	1.12143	0.973113	0.966908	0.939297	0.996713	1.07005	1.04212	1.02064	1.10894	1.11448	1.02392	1.03304	0.975711	1.10548	1.08061
639	TWCC50952, TWCC13878, TWCC13846 and TWCC13847 CNV	3	1590001..1591000	0.922527	0.973482	1.11753	1.06807	1.0595	1.98482	1.09493	1.01627	1.09558	0.991247	1.10859	2.31356	1.73532	1.66764	1.03725	1.10692	1.09822	1.09125	1.00062	1.12031	1.12744	1.08229	1.15354	1.01517	1.08344	1.07595	1.08551	1.09463	1.01409	1.03716	1.01423	1.0169	1.05276	1.08972	1.25718	1.04764	1.00815	1.02877	1.06276	1.13438	1.09886	1.04925	1.0961	1.01689	0.863958	1.06617
640	TWCC50952, TWCC13878, TWCC13846 and TWCC13847 CNV	3	1591001..1592000	1.0321	1.13611	0.989058	0.993361	0.998775	2.23589	0.976126	1.04091	1.03041	1.09956	1.0822	2.94563	2.15471	1.80687	1.14032	0.960816	1.16292	1.07184	1.04108	1.11822	1.07725	1.14078	1.01873	1.20889	1.00541	1.04589	0.989797	1.06672	1.17726	1.03054	1.00018	1.03678	1.0856	1.02963	1.13447	1.03418	1.09574	1.03335	1.04093	1.00725	1.1341	1.05724	1.03225	1.08947	0.728864	1.14292
641	TWCC50952, TWCC13878, TWCC13846 and TWCC13847 CNV	3	1592001..1593000	1.07942	1.13773	0.995599	1.11649	1.15935	2.08044	1.07011	1.06106	1.03079	1.08546	1.02409	2.94851	2.17703	1.98138	1.17502	0.992713	1.14862	1.11681	1.13192	1.16057	1.09566	1.11016	1.01476	1.14084	0.962279	0.944046	1.05466	1.02361	1.14457	1.10766	0.998297	1.09779	1.04319	1.0364	1.05555	1.02235	1.10037	1.06639	1.00837	1.11919	1.05543	1.11265	1.00884	1.04469	0.892465	0.986337
642	TWCC50952, TWCC13878, TWCC13846 and TWCC13847 CNV	3	1593001..1594000	1.15104	1.23971	1.21114	1.17144	1.16378	2.06184	1.15161	1.06609	1.17057	1.03968	1.13023	2.62208	1.86371	1.97239	1.24695	1.10861	1.16914	1.09161	1.20598	1.16395	1.06534	1.26823	0.977653	1.19547	1.13233	1.14747	1.11964	1.08567	1.15269	1.23473	1.13405	1.16263	1.1165	1.11611	1.2381	1.15131	1.1969	1.18054	1.08967	1.19012	1.20346	1.13485	1.0943	1.13247	0.863861	1.1136
643	TWCC50952, TWCC13878, TWCC13846 and TWCC13847 CNV	3	1594001..1595000	1.03701	1.03598	1.10271	0.939649	0.926788	2.02973	0.934292	1.07809	1.13181	0.983848	1.04138	2.90835	2.16225	2.00422	1.08149	0.918115	1.08373	1.16204	0.995977	1.09619	0.969728	1.08327	0.974121	1.09407	1.03584	1.00517	1.03469	0.988766	0.974496	1.0387	1.09682	1.03006	1.00746	1.0608	1.06322	0.966582	1.01941	1.05551	0.939716	1.0999	1.02686	1.07908	1.05572	1.02573	0.790483	1.01627
644	TWCC50952, TWCC13878, TWCC13846 and TWCC13847 CNV	3	1595001..1596000	1.06825	0.85146	0.969562	0.856931	0.935478	1.86779	0.902923	0.896655	0.95947	0.985248	0.901683	2.52125	1.83545	1.59865	0.870266	0.770733	0.828443	0.90545	0.953635	0.887105	0.837865	0.886353	0.805234	0.809259	0.868667	1.02335	0.982102	0.877967	0.963758	0.958244	0.972039	1.00328	1.00487	0.880337	1.05311	0.993482	0.998721	0.926682	0.998234	0.91391	1.00463	0.966349	1.01428	0.914842	0.868386	0.994034
645	TWCC50952, TWCC13878, TWCC13846 and TWCC13847 CNV	3	1596001..1597000	0.99906	1.02159	1.07108	0.971153	1.08745	2.02798	0.94812	0.975867	1.14341	1.06262	1.0809	2.81762	2.02945	2.06654	1.03253	1.07073	0.987689	0.964447	0.957942	1.1902	1.00389	1.06824	1.06492	1.09764	1.12203	1.02498	1.0447	1.08094	1.07948	0.978219	1.03841	1.00998	1.01321	1.05495	0.94077	1.06127	1.06898	1.09826	1.05473	1.05435	1.13425	1.0794	1.08056	1.01327	0.775688	1.0838
646	TWCC50952, TWCC13878, TWCC13846 and TWCC13847 CNV	3	1597001..1598000	0.971024	0.990636	0.999482	0.931979	1.05394	2.0108	1.18468	1.13457	0.918803	1.16446	0.955305	2.70233	1.87525	2.05092	1.01716	0.924377	0.949933	1.00221	0.962939	0.819477	0.959736	1.04816	1.00022	1.06877	0.943549	1.01192	0.99264	1.00257	1.01983	1.01173	0.963405	1.03985	1.05977	0.944692	1.0521	0.932535	1.09575	1.00437	1.03922	0.997877	1.01529	0.987731	0.950103	0.947241	0.959712	0.990789
647	TWCC50952, TWCC13878, TWCC13846 and TWCC13847 CNV	3	1598001..1599000	1.07968	0.918762	0.957999	0.961501	1.04468	1.98176	0.909991	1.21161	0.878958	1.12164	1.04997	2.71178	2.02379	1.95807	1.05043	0.990654	1.0396	1.10398	1.04421	1.02447	1.00465	1.07878	1.00987	1.02947	1.05129	1.00489	1.03646	1.08393	1.14917	1.10576	1.01038	1.06162	1.09539	1.03496	1.00361	0.974491	1.03354	1.06069	1.03686	1.11265	1.08228	1.04295	1.11088	0.989894	1.05199	1.056
648	TWCC50952, TWCC13878, TWCC13846 and TWCC13847 CNV	3	1599001..1600000	1.13303	1.10745	1.14125	1.10602	1.05898	2.11383	1.11325	1.09988	1.06775	1.09346	1.06152	2.96789	2.34242	1.99785	1.07454	1.0251	1.1357	1.09926	1.02338	0.993255	1.10233	1.13642	1.01904	1.17318	1.0686	1.02421	1.06492	1.04374	1.12757	1.08675	1.05537	1.04593	1.12879	0.994922	0.985209	1.03303	1.1332	1.08535	1.00122	1.07181	1.05907	1.01516	1.07044	1.14547	1.00205	1.07683
649	TWCC50952, TWCC13878, TWCC13846 and TWCC13847 CNV	3	1600001..1601000	0.791469	0.912156	0.924293	0.983897	0.950461	1.91741	1.01792	1.04479	1.0749	0.958836	1.10292	2.66067	1.88607	1.6377	0.956071	1.00694	0.992277	0.885636	0.875365	0.824249	0.86794	0.957566	0.879355	0.837091	0.980288	0.940578	0.984101	0.996504	0.877333	0.907322	0.953102	0.850901	0.960793	0.870414	0.894683	0.983768	0.89748	0.926132	0.966515	0.945985	0.983717	0.897485	0.987521	0.941356	1.3484	0.878355
650	TWCC50952, TWCC13878, TWCC13846 and TWCC13847 CNV	3	1601001..1602000	0.823083	0.839967	0.798303	0.828866	0.939624	1.56214	0.87541	0.72883	0.945608	0.852799	0.928524	2.21503	1.79102	1.65749	0.857546	0.869686	0.807176	0.972024	0.796246	0.923778	0.781737	0.742626	0.903453	0.966856	0.90703	0.815771	0.848504	0.812282	0.83614	0.854658	0.835425	0.83226	0.821013	0.819153	0.885887	0.857821	0.80117	0.900508	0.917454	0.920082	0.79466	0.77445	0.941013	0.785961	1.04535	0.773546
651	TWCC50952, TWCC13878, TWCC13846 and TWCC13847 CNV	3	1602001..1603000	1.04336	1.13673	1.11253	1.07555	1.08509	1.94739	1.05685	1.19661	0.921204	1.05286	0.965034	2.97947	1.95574	1.83487	1.09414	1.0848	0.946915	1.01735	0.998718	1.07828	1.00112	1.01014	0.99419	1.01235	0.919437	1.10031	1.09844	1.08945	1.10278	1.03045	1.02199	1.10274	1.09402	1.06414	0.944376	0.918094	1.06703	0.991422	1.03698	1.10161	1.02054	1.02717	1.18781	0.985238	1.14797	1.14992
652	TWCC50952, TWCC13878, TWCC13846 and TWCC13847 CNV	3	1603001..1604000	1.02639	1.10185	0.983213	0.984789	1.05238	1.91925	1.14923	1.15432	0.980835	1.08848	0.997721	2.56562	1.92154	1.82397	1.06702	1.03236	0.988347	0.979146	1.06439	0.925123	1.00131	1.02776	0.963652	0.989895	1.00713	1.17827	1.06575	1.04329	1.03188	1.13785	1.04326	1.0061	1.04054	1.0943	1.06494	1.11441	1.11623	0.99567	1.11504	1.17228	1.12113	1.05323	1.15638	1.05914	1.24742	1.14742
653	TWCC50952, TWCC13878, TWCC13846 and TWCC13847 CNV	3	1604001..1605000	1.22615	1.15328	1.14572	1.2208	1.15309	1.96145	1.01879	1.16407	1.12913	1.10886	1.10796	2.80808	2.20047	2.06763	0.988072	1.06313	1.11888	1.20255	1.09825	1.09231	1.09464	1.12698	1.0062	1.13757	1.16048	1.06419	1.05187	1.02648	1.05823	1.09091	1.1442	1.06088	1.10608	1.12472	1.09289	1.05255	1.12081	1.04966	1.03819	1.07041	1.057	1.07233	1.13472	1.12941	1.04369	1.0214
654	TWCC50952, TWCC13878, TWCC13846 and TWCC13847 CNV	3	1605001..1606000	1.19114	1.09081	1.14353	1.21514	1.28965	2.15648	1.1162	1.15217	1.25532	1.15282	1.07796	2.67641	2.2288	1.89983	1.09867	1.17383	1.10845	1.19902	0.998121	1.14508	1.05051	1.21862	0.993234	1.25658	1.14689	1.04032	1.12272	1.02914	1.11043	1.05213	1.074	1.08273	1.04689	1.03236	1.01287	1.01085	1.1429	1.02732	1.12312	1.0636	0.99986	1.03334	1.04818	1.05689	1.01205	1.0493
655	TWCC50952, TWCC13878, TWCC13846 and TWCC13847 CNV	3	1606001..1607000	1.03509	0.958136	0.976936	0.973046	1.07921	1.97616	0.932281	1.22415	1.02954	1.05195	0.984228	2.96105	2.15774	1.8557	1.06625	1.02683	1.0222	1.11337	1.00671	1.05286	0.984754	0.996408	1.11195	0.97466	1.0398	1.01055	1.1067	0.96825	1.01224	1.0161	0.941957	1.05566	1.01832	1.02832	0.98279	0.936252	1.01292	1.06673	1.05595	0.991772	1.00764	0.978298	1.07716	0.965616	1.17391	1.09424
656	TWCC50952, TWCC13878, TWCC13846 and TWCC13847 CNV	3	1607001..1608000	1.17199	1.22436	1.10225	1.3313	1.05428	1.98237	1.06193	1.05033	1.08179	1.08328	1.07135	2.62871	1.91415	1.97565	1.09252	1.03112	1.08108	1.19295	1.0973	1.26864	1.1727	1.11345	1.13457	1.20438	1.03858	1.095	1.13612	1.1098	1.07823	1.10808	1.04363	1.09092	1.13039	1.06297	1.15417	1.08417	1.06176	1.06951	1.09682	1.10049	1.01132	1.1726	1.12981	0.979594	1.26458	1.10202
657	TWCC50952, TWCC13878, TWCC13846 and TWCC13847 CNV	3	1608001..1609000	1.15168	1.04465	1.11441	1.10451	1.04925	1.97091	1.03608	1.07676	1.09769	0.948879	1.00212	2.69226	2.0591	1.87818	1.00487	0.962452	1.13227	1.02417	1.06176	1.01523	1.07843	0.995298	1.04841	1.06662	0.969049	0.943894	1.13324	1.01185	1.10439	1.01771	1.0059	1.11617	1.011	1.08142	1.11578	1.01576	0.987715	1.08005	1.11164	1.04534	0.990983	1.05921	1.06329	1.01538	0.924164	1.08506
658	TWCC50952, TWCC13878, TWCC13846 and TWCC13847 CNV	3	1609001..1610000	0.940846	0.891699	0.878593	1.00945	0.914327	1.86084	0.878522	0.943118	0.988297	0.970187	0.948652	2.44008	1.95174	1.60577	0.936577	0.953557	1.05932	0.971056	0.955499	0.956152	0.991683	0.923798	0.946402	1.00484	0.939756	0.973739	0.987895	0.988473	0.963562	0.988415	1.00914	0.931968	0.950092	1.0074	0.841515	1.02492	0.892706	0.910705	0.909533	0.885975	0.969426	0.952179	0.948131	0.914274	0.950216	0.852799
659	TWCC50952, TWCC13878, TWCC13846 and TWCC13847 CNV	3	1610001..1611000	0.882769	1.13681	1.08025	1.09592	1.00001	2.18471	1.07993	1.18296	0.967722	1.12034	1.00787	2.81131	1.97407	1.93951	1.05843	0.997866	1.02767	0.995924	1.05705	1.03157	1.07955	0.992301	1.0361	0.961119	1.08852	0.999832	1.06971	1.02731	1.14234	1.07985	1.06154	1.00832	1.05718	0.981631	1.03002	1.08612	1.05793	1.02297	1.0745	0.972278	1.02088	1.00442	1.0247	0.986858	1.32347	1.08366
660	TWCC50952, TWCC13878, TWCC13846 and TWCC13847 CNV	3	1611001..1612000	1.20357	1.12145	1.21736	1.01314	1.13767	2.18661	1.11408	1.20588	1.03478	1.08146	1.12142	2.94596	1.99726	2.03455	1.06019	1.09299	1.11305	1.15292	1.04045	1.05366	1.05097	1.14644	1.09944	1.15129	1.04096	1.03061	1.0308	1.12353	1.06807	1.04077	1.08146	1.13766	1.02913	1.05495	1.10982	1.02384	1.10032	1.16939	1.10643	1.14413	1.08138	1.06115	1.08728	1.042	1.21456	1.08225
661	TWCC50952, TWCC13878, TWCC13846 and TWCC13847 CNV	3	1612001..1613000	0.974019	0.999758	1.07029	1.04685	0.943309	1.9618	0.957015	0.984132	0.993318	0.85704	0.996811	2.29779	1.77661	1.69126	1.00978	1.04042	0.983506	1.12254	0.960263	1.14614	1.03012	1.09329	0.904293	1.06746	0.951039	0.949938	0.9262	1.0978	0.973081	1.01541	1.10154	0.9505	1.04922	0.908017	1.01643	1.04644	1.02698	1.03786	0.872161	1.01279	0.940753	0.95355	0.955301	1.00172	0.797581	1.03406
662	TWCC50952, TWCC13878, TWCC13846 and TWCC13847 CNV	3	1613001..1614000	0.789823	0.73401	0.809875	0.76681	0.778504	1.72315	0.894328	0.946292	0.835937	0.90573	0.886015	2.35624	1.68826	1.66326	0.918622	0.973144	0.985785	1.10791	0.80362	0.950581	1.07418	0.96988	0.972257	0.989976	0.950372	0.803784	0.87582	0.868862	0.874209	0.863324	0.765339	0.914155	0.870393	0.910285	0.842702	0.849119	0.882649	0.838292	0.836763	0.885908	0.817647	0.896523	0.838031	0.936923	0.934782	0.832919
663	TWCC50952, TWCC13878, TWCC13846 and TWCC13847 CNV	3	1614001..1615000	0.994505	1.05477	1.03967	1.18176	1.06206	1.77876	0.948262	1.11097	1.15686	0.944361	1.13068	2.58464	2.03697	1.78398	1.17354	1.06126	1.1217	1.1418	1.09193	1.12267	1.23592	1.22691	1.06972	1.06161	1.16543	1.01959	1.06429	1.0981	1.03457	1.05034	1.01664	0.98352	1.01462	1.07584	1.03611	1.12954	1.09816	1.03058	1.0034	1.09616	1.02135	1.03349	0.970553	1.07898	0.815452	1.06028
664	TWCC50952, TWCC13878, TWCC13846 and TWCC13847 CNV	3	1615001..1616000	1.13848	1.0876	1.12626	1.20738	1.08982	2.09941	1.08409	1.15249	0.989136	1.11147	0.967515	2.78494	2.14089	2.04728	0.998601	1.04772	1.05713	1.082	1.07929	0.99068	1.03636	1.04624	0.907951	0.97465	1.05051	0.930629	0.976668	1.10859	0.991502	0.908631	1.10996	1.06266	1.00703	1.02616	1.00713	0.990716	0.982207	0.985883	1.01373	1.00458	0.968993	1.02364	1.05729	0.97504	0.89204	1.13268
665	TWCC50952, TWCC13878, TWCC13846 and TWCC13847 CNV	3	1616001..1617000	1.19877	1.11988	1.05363	1.10585	1.18483	1.94264	0.962048	1.0152	1.01388	1.07287	0.996123	3.00089	2.00535	2.03973	1.09411	1.08056	1.01734	1.05639	1.07593	1.14342	1.10868	1.08915	1.04321	1.01955	1.00731	1.04016	1.16896	1.10585	1.03537	1.08161	1.08567	1.04861	1.03073	0.991136	1.13009	1.13285	1.08178	1.00762	1.06758	1.13991	1.09824	1.12034	1.02269	1.04558	1.09295	1.00792
666	TWCC50952, TWCC13878, TWCC13846 and TWCC13847 CNV	3	1617001..1618000	1.25496	1.05972	1.0702	1.15279	1.15054	1.86801	1.10361	1.12726	1.10559	1.09819	1.03304	2.8517	2.41678	2.00649	1.07172	0.989516	1.16827	0.984787	1.14971	1.18799	1.08248	1.05443	1.0936	1.07364	0.960145	0.980858	1.10461	1.05836	1.0388	1.03864	1.04853	0.988929	1.04519	1.01626	1.05111	1.05963	0.993839	1.04378	1.03738	1.03697	1.06432	1.05472	1.13151	1.02878	1.11095	0.966958
667	TWCC50952, TWCC13878, TWCC13846 and TWCC13847 CNV	3	1618001..1619000	1.04618	1.05374	1.08613	1.04841	1.07803	1.94179	1.0319	1.08913	1.04847	1.07427	1.07144	3.11331	2.04521	1.92868	0.971882	0.993588	1.04666	1.11629	0.967469	1.04339	0.953438	1.06439	1.12027	1.02594	1.00358	0.994234	1.09084	1.02214	0.988614	1.00584	1.08337	1.01768	0.963098	1.02354	1.03776	0.978466	0.961987	1.05565	1.05393	1.10426	1.04315	0.990135	0.999911	0.991803	0.741571	1.02883
668	TWCC50952, TWCC13878, TWCC13846 and TWCC13847 CNV	3	1619001..1620000	1.08999	0.981503	1.0132	0.880933	1.10163	2.10332	1.08361	1.0795	1.02603	0.939918	1.07896	2.94303	1.99667	1.91624	1.06797	1.08991	1.05146	0.984046	1.03548	1.16244	1.0295	1.10785	1.00444	1.04085	0.986997	1.08443	1.12218	1.1126	1.02232	1.16647	1.01543	1.02031	1.07412	1.00122	1.07767	1.03973	1.12354	1.13986	1.0648	1.16531	1.0748	1.03882	1.09312	1.06383	0.889139	1.05704
669	TWCC50952 and TWCC13878 CNV	3	1620001..1621000	0.914679	0.942555	0.983056	1.04709	1.03896	2.06101	1.01065	1.15907	1.00656	1.10017	1.08037	1.69692	1.42086	1.46304	1.17851	1.08727	1.08536	1.03955	1.04802	1.11616	1.10829	1.13762	1.20796	0.996864	1.07644	1.07594	0.996949	1.01111	1.0312	1.13793	1.06255	1.06793	1.00677	1.0167	1.02424	1.02472	1.05834	1.05018	1.09173	1.13894	1.06938	1.00614	1.00479	1.07004	0.927858	1.09638
670	TWCC50952 uniqe CNV	3	1621001..1622000	1.08162	1.16994	1.00912	1.09766	1.19853	2.27504	1.18551	1.09977	1.00584	1.12377	1.06661	1.11396	1.08048	0.923573	0.95947	0.963365	0.900076	0.926948	1.08592	1.02069	1.00278	1.09465	1.03261	1.05933	1.03853	1.04648	1.02778	1.08957	1.02815	1.02045	1.16209	1.00635	1.09379	1.03048	1.03387	1.07417	1.045	1.09694	0.99485	0.974804	1.02194	1.14326	1.01952	1.09608	0.97677	1.03648
671	TWCC50952 uniqe CNV	3	1622001..1623000	1.00522	1.10086	1.10895	1.16259	1.0741	1.95888	1.06799	1.00974	1.06853	1.11573	1.09083	0.966223	1.10303	0.905771	1.05893	1.0326	1.0274	1.05854	1.2013	0.990176	0.952113	1.09049	1.14179	1.03937	1.00366	1.03932	1.12782	1.09819	1.03176	1.06375	1.02708	1.11003	1.02629	1.05442	1.07903	1.10635	1.0789	1.04449	1.06875	1.08593	1.10825	1.10902	1.13798	1.09412	0.8375	1.11651
672	TWCC50952 uniqe CNV	3	1623001..1624000	0.954796	0.888295	1.12521	1.02842	1.02963	2.09481	1.1473	1.0235	1.00929	1.08342	1.00685	1.02165	1.08148	0.935307	0.989671	0.962208	0.95283	1.12948	1.06384	1.14854	1.02328	1.01362	1.1378	1.01648	1.0501	1.09513	0.988361	1.10044	1.0236	1.07829	1.10653	1.02933	1.03763	1.07848	1.10874	1.01518	1.1159	1.05966	1.07964	1.20276	1.02941	1.08117	0.967338	0.978821	1.19394	1.04212
673	TWCC50952 uniqe CNV	3	1625001..1626000	0.75415	0.738144	0.645237	0.667146	0.787788	1.84805	0.95064	0.891944	0.82002	1.02322	0.84377	0.931591	0.949676	0.966383	0.666227	0.815118	0.715531	0.794445	0.73898	0.794829	0.782637	0.757808	0.787652	0.799498	0.707285	0.703235	0.791642	0.780718	0.740068	0.896795	0.757424	0.681136	0.818162	0.819835	0.790678	0.874007	0.778249	0.775175	0.760064	0.734827	0.787092	0.827384	0.810195	0.771395	0.712328	0.768541
674	TWCC50952 uniqe CNV	3	1626001..1627000	0.90198	0.856066	0.865471	0.860053	0.825101	1.97826	1.05179	1.02472	0.801492	1.16703	0.831067	0.999569	0.954656	1.02924	0.848284	0.839416	0.952911	0.899236	0.807126	0.864506	0.804276	0.94594	0.766246	0.804038	0.757045	0.864631	0.834842	0.818822	0.859659	0.867877	0.870814	0.857685	0.903339	0.88361	0.821967	0.879855	0.857391	0.80119	0.844666	0.83959	0.820163	0.835149	0.838235	0.817476	0.904282	0.86804
675	TWCC50952 uniqe CNV	3	1627001..1628000	1.04574	1.23553	1.19946	1.07922	1.14114	2.11882	1.16724	1.10742	1.04607	1.11149	1.09449	0.928194	1.05618	1.12672	1.05376	0.993738	1.06591	1.021	1.00116	1.07629	0.920445	1.10166	1.00447	0.944742	1.08474	1.04281	1.11189	1.05831	1.05219	1.06893	1.07104	1.13964	1.04074	1.11691	1.00849	1.04428	1.05184	1.15434	1.08727	1.11547	1.0218	1.08096	1.10591	1.11942	0.778995	1.13994
676	TWCC50952 uniqe CNV	3	1628001..1629000	0.91843	1.06187	0.987126	1.00751	0.988078	2.08635	0.953636	1.10582	0.914733	1.13299	1.04659	0.997097	1.00133	0.911476	0.941966	0.902956	1.03324	0.895674	0.919879	1.08552	1.0343	1.09091	0.970052	1.0081	1.06498	0.98317	1.04068	0.979635	0.948167	1.01133	1.00856	1.00485	0.957314	1.05165	1.03682	1.03375	1.13722	1.09077	0.971203	1.03699	0.936928	0.99125	0.965484	1.05234	1.14615	0.970006
677	TWCC50952 uniqe CNV	3	1629001..1630000	0.914395	0.973695	1.03056	1.02374	0.942489	2.24647	1.00704	1.00746	1.08296	1.08319	1.02627	1.03699	1.11656	0.974954	1.03934	1.03041	0.957458	0.920447	1.00436	1.09739	1.01214	1.09651	0.987556	1.0693	1.03532	0.950729	1.09082	1.01415	1.02389	1.01314	1.05463	0.97587	0.951868	0.995706	1.10384	1.00799	1.02606	0.994367	1.02715	0.965147	0.957268	0.996417	1.02413	0.948256	1.07645	0.96593
678	TWCC50952 uniqe CNV	3	1630001..1631000	1.1125	1.06142	0.994952	0.998276	0.94562	2.09008	1.10455	1.03943	1.06752	0.958836	1.09095	0.86625	1.01115	0.862312	1.06279	1.02742	1.09322	1.13379	0.970415	1.0548	1.04295	1.02434	1.11928	1.24927	1.06669	1.02324	1.07885	1.04866	1.00313	1.04783	0.948452	1.04051	1.0676	1.01105	1.09917	1.00667	1.07589	1.10779	1.03241	1.06254	1.05337	1.02186	1.00627	1.04316	0.852024	0.996689
679	TWCC50952 uniqe CNV	3	1631001..1632000	1.03335	0.9995	1.11751	0.965583	1.04324	2.08887	1.25578	1.15454	1.00192	1.08257	1.02169	1.01799	1.11842	0.955827	0.930999	1.05782	1.04009	1.11839	1.09018	1.03183	1.15554	0.938948	0.999595	1.05781	1.078	1.03724	0.997201	1.09568	1.08554	1.07871	1.14067	1.07147	1.05099	0.982594	1.11228	0.994166	1.05548	1.10238	1.11403	1.08485	1.06259	1.05832	1.06883	1.0137	1.1261	1.12129
680	TWCC50952 uniqe CNV	3	1632001..1633000	1.34308	1.09017	1.11239	1.30669	1.18721	2.24974	1.13611	1.12592	1.10205	1.038	1.14836	1.015	1.12332	1.04264	1.06567	1.14787	1.17959	1.28809	1.17018	1.12195	1.27164	1.20757	1.25096	1.16036	1.24856	1.09053	1.0507	1.08138	1.18058	1.10487	1.11786	1.12293	1.06337	1.11486	1.13495	1.0787	1.15758	1.14095	1.04391	1.13296	1.1171	1.07381	1.12969	0.996013	1.27657	1.11165
681	TWCC50952 uniqe CNV	3	1633001..1634000	1.04878	1.00814	0.908808	0.939917	1.04085	1.98941	1.08304	1.04101	0.860284	1.10374	1.0246	1.00898	1.07816	0.987264	0.926581	0.987203	1.08391	0.888492	1.07076	0.989776	0.909772	0.908807	0.842836	0.954023	0.918568	1.02823	0.954602	0.929072	1.04803	1.06663	1.01336	1.06743	0.986177	1.02074	1.02123	0.971795	1.03432	1.02254	0.962479	0.994279	1.00956	0.974257	1.04678	0.976419	1.03976	1.03478
682		3	1662001..1663000	1.20281	0.993793	1.24514	1.08834	1.06377	1.03135	1.16181	1.09502	1.10151	1.09387	1.10263	1.02876	1.00931	1.08654	1.12199	1.04872	1.19953	1.14761	1.06711	1.12323	1.13833	1.08981	1.10268	1.11355	0.959109	1.03154	1.19045	1.05461	1.04502	1.00219	1.05783	1.01413	1.09609	1.12512	1.12446	1.12325	1.03419	1.13951	1.12305	1.00512	1.14311	1.11787	1.0405	1.04253	0.854171	1.10184
683		3	1945001..1946000	0.663618	0.530609	0.644374	0.566243	0.693104	0.850696	0.679402	0.581861	0.554936	0.794091	0.689445	0.667074	0.712138	0.599132	0.611179	0.601121	0.650026	0.549168	0.65878	0.64612	0.624198	0.6692	0.640913	0.668953	0.530597	0.618709	0.664797	0.637191	0.656531	0.668146	0.600613	0.719092	0.699982	0.592702	0.6706	0.584598	0.769679	0.652838	0.694589	0.723784	0.781255	0.686639	0.639193	0.62631	0.482834	0.666154
684		3	1946001..1947000	0.918541	0.82215	0.745061	0.763916	0.745681	1.11644	1.00175	0.886949	0.81072	1.0965	0.828645	1.10378	1.01998	0.956077	0.805766	0.692101	0.742481	0.705153	0.7889	0.69672	0.790259	0.849189	0.795936	0.800042	0.75809	0.760583	0.786984	0.8372	0.792549	0.830461	0.717127	0.821405	0.797372	0.766008	0.805058	0.841745	0.925674	0.758918	0.927063	0.866367	0.851735	0.932147	0.912953	0.799921	0.481191	0.781654
685		3	1947001..1948000	0.926315	0.758207	0.842513	0.782854	0.799843	0.95416	0.896956	0.951082	0.743619	0.997333	0.825765	0.948439	0.843633	0.874733	0.768554	0.866997	0.830185	0.833558	0.781042	0.742064	0.922974	0.753725	0.788403	0.759928	0.736033	0.762845	0.766286	0.790559	0.837044	0.724303	0.739516	0.858514	0.803982	0.712786	0.796219	0.792811	0.835937	0.77176	0.834254	0.903209	0.843623	0.979608	0.853658	0.758283	0.943331	0.814934
686		3	2078001..2079000	1.10046	1.19246	1.13773	1.07974	1.09884	1.05176	1.23053	1.29084	1.21986	1.12386	1.11056	1.11883	1.05402	0.98155	1.12066	1.07685	1.11738	1.07355	1.10879	1.1826	1.26099	1.18573	1.14078	1.15177	1.11531	1.01979	1.09729	1.11037	1.06901	0.983741	1.13018	1.13615	1.1154	1.05964	1.04664	1.02341	1.10742	1.05681	1.11034	1.131	1.08499	1.03163	1.181	1.09079	1.15263	1.10336
687		3	2089001..2090000	0.906139	1.05258	0.950173	0.945585	0.890545	1.08366	1.0068	0.982208	0.909905	1.10298	1.00883	1.05738	1.10492	1.04659	0.961957	0.980225	0.931582	0.937942	1.07426	0.865095	1.02575	1.0068	0.905015	0.93906	0.91186	1.08384	1.05184	0.936242	0.998094	1.01224	0.927297	1.04635	1.09955	0.849246	0.880918	0.9443	0.995355	0.926983	1.00515	1.03115	1.02749	1.09434	1.02685	0.967618	1.07858	1.01158
688		3	2171001..2172000	1.16125	1.11395	0.978525	0.94836	0.94441	0.988152	1.03032	1.14772	0.94618	1.14847	1.02278	0.923775	0.845152	1.00657	0.974902	0.959434	0.986383	0.93064	0.9592	0.834203	0.774091	0.950694	0.849997	0.997281	0.974502	0.99682	1.05168	1.0379	1.0424	1.01972	0.901305	1.03073	1.04561	1.00187	0.871661	0.950109	1.01401	0.929617	0.961898	1.0228	0.995673	0.971986	0.939952	0.941803	1.03822	0.9955
689	clade IV unique CNV	3	2273001..2274000	2.25421	2.3389	2.31181	2.46017	2.37023	1.03661	1.01899	1.01111	1.01866	1.03755	1.05426	1.09432	1.00004	1.04145	0.477361	0.434039	0.454352	0.432774	0.392143	0.384975	0.423442	0.387378	0.366927	0.390473	0.355043	0.37514	0.392526	0.417464	0.400362	0.414295	0.395093	0.34381	0.39384	0.36355	0.373362	0.359951	0.874354	0.879162	0.83846	0.921269	0.847628	0.856675	0.836809	0.894344	0.805066	0.847096
690		3	2274001..2275000	0.691357	0.804974	0.654298	0.745207	0.681634	1.08513	0.962231	1.11528	0.889999	1.00048	1.06055	1.08234	1.0865	0.872005	0.568898	0.536839	0.535028	0.494353	0.641906	0.467286	0.591752	0.488268	0.592422	0.566804	0.509234	0.636111	0.616057	0.629897	0.554525	0.578748	0.534822	0.599058	0.615227	0.614006	0.52374	0.595054	1.54306	1.83782	1.79289	1.82113	1.64348	1.71242	1.65576	1.68184	1.30629	1.70675
691		3	2275001..2276000	1.03556	1.14466	0.976466	1.0392	1.07286	1.07491	1.0767	1.11517	0.929723	1.02318	1.01318	1.0927	0.956815	0.981095	0.499946	0.54123	0.543323	0.590791	0.636621	0.523352	0.526045	0.522652	0.536078	0.604515	0.554499	0.52607	0.586218	0.600302	0.505688	0.544401	0.541078	0.514995	0.625977	0.559071	0.487943	0.54394	1.65085	1.57651	1.53041	1.67431	1.57231	1.56159	1.51723	1.58074	1.2581	1.63723
692		3	2276001..2277000	0.609898	0.495032	0.556317	0.504049	0.578963	1.0241	1.03518	1.14183	0.897671	1.09753	0.979291	1.1508	0.999447	0.982487	0.475856	0.49693	0.578455	0.565182	0.474375	0.488729	0.540925	0.425629	0.572099	0.414635	0.586215	0.490394	0.504185	0.459997	0.395774	0.438963	0.42483	0.421352	0.439882	0.424018	0.409379	0.427478	1.39611	1.46792	1.52654	1.45326	1.55678	1.46203	1.41612	1.60105	1.2059	1.63878
693	clade I unique CNV	3	2277001..2278000	1.20086	1.13071	0.981928	1.09799	1.24943	1.07721	1.05973	1.16302	0.979916	1.04049	0.911386	1.00686	1.13801	1.01772	0.269153	0.321761	0.341622	0.315866	0.311384	0.311903	0.379885	0.282357	0.310368	0.291731	0.314677	0.317315	0.334412	0.297498	0.286684	0.30858	0.275402	0.307575	0.312679	0.288061	0.34315	0.325458	2.17721	2.21812	2.21215	2.33236	2.24166	2.24936	2.22298	2.19499	1.99851	2.28917
694	clade I unique CNV	3	2278001..2279000	0.908243	0.693702	0.815357	0.721096	0.753044	1.0919	1.19224	1.12809	0.964442	1.09712	0.997364	1.25093	1.12825	0.909426	0.00448865	0.00533181	0.0120214	0.00718203	0	0.00789374	0.00290545	0.00914129	0.00240013	0.00803893	0.00300303	0.00440124	0.00265876	0	0	0.000387165	0	0	0	0.00106563	0.00371603	0	2.36284	2.36973	2.26338	2.33013	2.27412	2.2871	2.24101	2.24005	1.94989	2.3942
695		4	1..1000	0.831512	0.809793	0.782004	0.792249	0.693814	0.940698	0.891323	0.83622	0.691217	0.899321	0.882039	0.932924	0.810459	0	0.812565	0.970831	0.786789	0.793931	0.864271	0.757189	0.735213	0.863524	0.823713	0.717785	0.722756	0.812637	0.784665	0.759828	0.827878	0.846749	0.840936	0.741458	0.818096	0.785683	0.730826	0.819721	0.833922	0.838523	0.840728	0.808113	0.856827	0.763472	0.803989	0.849335	1.01812	0.78287
696		4	1001..2000	0.939893	0.884072	0.89753	1.06736	0.857292	0.970395	1.02554	1.17861	0.798333	1.01296	0.969376	0.980161	0.994832	0.770114	0.821459	0.871388	0.851018	0.866743	0.828427	0.931314	0.866725	0.854559	0.879999	0.785595	0.783493	0.939046	0.876945	0.821538	0.95918	0.902759	0.959926	0.85906	0.891514	0.868274	0.883689	0.865344	0.883559	0.923958	0.974525	0.829705	0.896027	0.866629	0.896864	1.01799	1.638	0.934769
697		4	2001..3000	1.04617	1.07645	1.00301	0.987633	0.970199	1.02006	1.02495	1.20227	0.911815	1.11212	1.15244	1.07123	1.0241	0.947227	1.19261	0.965471	1.06365	1.13774	1.06346	1.10034	1.07937	1.07934	1.03874	1.14594	1.12501	1.00309	1.10932	1.06017	0.985568	1.0826	1.07837	0.978238	1.00803	1.13769	0.972653	0.969535	1.0072	1.08251	1.02047	1.01877	1.02351	1.05038	1.02208	1.15789	1.96451	1.07728
698		4	3001..4000	1.08902	1.14044	1.11376	1.03414	1.06323	1.00634	1.09815	1.17363	1.02041	1.01223	1.12817	1.09801	1.01132	0.846755	1.0334	0.956462	1.04283	1.03353	1.14638	1.05855	1.07746	1.03973	1.07403	0.976264	1.11252	1.03696	1.07895	1.00613	1.06507	1.05471	1.0365	0.996488	1.04292	1.06062	1.00355	1.05105	0.981523	1.17987	1.03501	1.00808	1.05531	1.07812	1.1011	1.09513	1.24814	1.13435
699		4	4001..5000	1.09701	0.866828	0.882113	0.893816	1.07398	1.10692	1.01601	1.21662	0.984268	1.05958	1.02527	1.06571	1.04363	0.945725	0.971254	1.04269	0.993239	1.05927	1.03848	0.99931	1.045	0.960523	1.07259	0.948349	0.987682	1.03493	1.05497	0.964292	1.10635	1.04937	1.11782	1.03841	0.969709	1.00409	0.996928	1.19862	0.941942	1.09716	1.07029	1.05092	1.04109	1.10647	1.00596	1.07192	1.03464	1.07065
700		4	5001..6000	1.17921	1.10652	1.09166	1.09734	0.982457	1.09866	1.0339	1.21712	0.988072	0.913944	1.16246	0.930238	1.05717	1.04779	1.13582	1.00836	1.09731	1.0326	1.03757	1.10604	1.08489	1.03162	1.15353	1.10519	1.06111	1.02162	1.01458	1.01736	1.09917	1.1055	1.06222	1.0571	1.0579	1.05981	1.01656	1.09109	1.0154	1.03615	1.07973	1.05641	1.05001	1.01102	1.05524	1.08484	1.20686	1.12763
701		4	6001..7000	0.917959	1.18099	1.04783	1.02121	1.03076	1.106	1.11583	1.35368	1.11038	1.05586	1.15013	0.888588	1.02996	0.994129	0.801396	0.951319	1.05623	0.914197	1.03895	1.08328	1.01237	1.07216	1.08557	0.989532	0.940011	0.975443	1.05616	0.996141	1.09584	1.06548	1.04964	1.03255	1.03066	1.08946	1.01766	1.07936	0.990728	1.11924	1.0144	0.989085	1.04583	0.905363	1.05611	1.03141	1.32764	1.09374
702		4	7001..8000	0.832279	0.856256	0.859459	0.85039	0.941732	0.919774	0.936203	1.48427	0.625091	1.05861	1.05894	1.1979	0.99996	1.08032	0.896641	0.939752	0.91709	0.901339	0.902614	0.858305	0.887658	0.842013	0.903512	0.841849	0.842544	0.935923	0.831552	0.888997	0.873187	0.970587	0.9993	0.913745	0.87498	0.879109	0.947609	0.845214	0.863006	0.877509	0.921142	0.856862	0.936777	0.863611	0.852447	1.03255	1.74186	1.01049
703		4	11001..12000	0.897932	0.906056	0.927147	0.803883	0.877865	0.966599	1.01816	1.31448	0.791926	1.19303	0.997109	1.02371	1.02678	1.03704	0.830815	0.802771	0.934813	0.765227	0.894606	0.90038	0.771538	0.751871	0.744694	0.791114	0.874647	0.864215	0.899981	0.936206	0.878021	0.823197	0.91395	0.88608	0.847397	0.876969	0.759103	0.797826	0.895064	0.878501	0.877814	0.930175	0.871471	0.963975	0.846906	0.937751	1.77955	0.852745
704		4	15001..16000	0.99771	1.02391	0.90921	1.01092	0.986501	1.0026	1.12351	1.32368	0.929465	1.12661	1.1176	1.14238	1.12455	0.891282	0.905097	1.04237	1.02977	0.983974	0.969595	0.950371	0.964392	0.951925	1.06343	1.02458	1.0356	1.03242	0.944792	0.973991	1.00406	0.938747	1.01051	1.04633	0.94282	1.0234	0.960362	1.03782	0.912663	0.988127	1.03475	1.00943	1.04615	0.962798	1.02481	1.00047	1.86291	1.0035
705		4	16001..17000	0.977052	0.941735	0.932717	0.94171	0.878326	0.959811	1.064	1.45947	0.917312	1.08245	1.05174	1.15937	1.13994	1.04712	0.993875	0.982585	0.963747	1.03541	0.917688	0.949256	0.891038	0.986796	0.970442	0.870797	1.06026	0.977217	0.869949	0.951549	0.993506	0.882064	0.98425	0.939526	0.898513	0.874071	0.807169	0.799432	0.846346	0.993586	0.896317	1.0001	0.855952	0.901199	0.928998	0.927023	1.82326	0.978489
706		4	17001..18000	0.885604	1.05187	1.04675	0.93403	0.990202	0.914972	1.02205	1.19294	1.04744	1.0101	1.11689	1.07464	1.05801	0.889788	1.01306	0.994302	0.937264	1.06353	1.04698	1.02636	0.974372	0.995929	1.09254	1.02368	0.948361	1.00758	0.910054	0.886095	0.99162	0.989069	0.982794	0.978548	1.00481	0.891095	0.972983	0.988883	0.940044	0.976838	0.961738	1.0309	0.928323	0.949427	0.987789	0.968298	1.71823	1.01967
707		4	21001..22000	1.06246	1.08938	1.06044	1.15009	1.08201	1.02152	1.14456	1.37538	1.13361	1.05006	1.16471	1.09906	1.04185	0.919593	1.05597	1.15317	1.10405	0.957994	1.03902	1.0842	1.12198	0.984255	1.2002	0.986079	1.06623	1.03916	1.03963	1.04506	1.10006	1.16674	0.978242	1.12541	0.950976	1.11991	1.08024	1.06154	1.05549	1.05855	0.99693	0.997165	1.04595	1.05927	1.05545	1.07725	1.82912	1.11288
708		4	22001..23000	0.927317	0.803704	1.11731	0.953642	1.06764	1.03248	1.03218	1.20843	1.00566	0.997643	1.20889	0.946026	1.04957	0.990288	0.98009	1.00878	1.09915	1.06279	1.06863	1.14593	0.973862	0.96097	1.10794	0.907783	0.926392	1.1401	1.12787	1.07824	1.17428	1.19736	1.05653	1.15796	1.09271	1.09766	1.07472	1.18421	1.11565	1.15405	1.07868	1.07549	1.04615	1.0792	1.16292	1.10348	1.4275	1.08136
709		4	23001..24000	1.08936	1.09938	1.1217	1.21009	1.06032	1.08078	0.932247	1.08377	1.05035	0.955228	1.24086	1.10859	1.04415	0.974639	1.20567	1.10461	1.12592	1.263	1.17226	1.24677	1.2231	1.04569	1.07771	0.885271	0.984837	1.04179	1.19496	1.11516	1.11689	1.22975	0.978357	1.08657	1.13888	1.18378	1.13374	1.15562	1.0812	1.12368	1.10038	1.13224	1.15084	1.18162	1.17982	1.10926	1.39131	1.11915
710		4	36001..37000	1.15899	1.05161	1.28474	1.06803	1.18007	1.1651	1.1483	1.19468	1.10634	1.04711	1.17318	1.0701	1.12038	1.02104	1.0241	1.03179	1.13084	1.08193	1.00864	1.20171	1.06216	1.1368	1.14405	1.04948	1.08719	1.13977	1.12966	1.07741	1.06691	1.22388	0.959447	1.09084	1.08585	1.08783	1.07943	1.05855	1.09033	1.05249	1.09946	1.20184	1.03513	1.06893	1.19857	1.06939	1.55422	1.15683
711		4	44001..45000	1.10594	1.0846	1.04645	0.915429	0.944863	1.02087	1.25992	1.32274	0.91761	1.08005	0.992045	1.01328	1.03846	1.06924	1.09561	0.950444	0.977126	0.98199	1.00778	0.872936	1.02167	0.945109	0.882945	1.03356	0.964729	0.998047	0.952487	1.02776	1.06282	1.02164	0.985705	1.02632	0.988276	0.88425	1.01241	0.935618	0.963669	0.88994	1.0043	1.00341	0.954269	0.990442	0.845502	0.937817	1.86011	0.969121
712		4	45001..46000	1.0144	0.976942	1.00591	1.0176	1.01081	1.02999	1.02983	1.30103	1.00344	1.05799	1.05529	1.05399	1.16568	1.06199	1.00951	0.889801	1.00824	1.07637	0.963358	1.06717	1.03043	1.02542	1.01875	0.939141	1.05507	0.961671	0.987808	1.02676	0.923439	1.05539	0.943155	1.05924	1.00966	0.888239	1.07963	0.843222	1.01044	0.911867	0.981241	0.946137	0.979268	0.990585	1.0384	0.931568	1.68923	1.03923
713		4	49001..50000	1.25762	1.15162	1.07505	1.23439	1.16146	1.02583	1.15907	0.980307	1.15624	1.0062	1.13894	0.946746	1.0973	1.01376	1.08749	1.26142	1.20312	1.35529	1.11572	1.21311	1.12694	1.15843	1.10904	1.11995	1.04923	1.14064	1.18464	1.03015	1.13268	1.17235	1.05146	1.13015	1.14351	1.10214	1.01126	1.13729	1.11881	1.09863	1.13114	1.26465	1.11003	1.03711	1.08573	1.16779	1.11095	1.11175
714		4	54001..55000	1.02431	0.985963	1.05512	1.1328	1.11853	1.08192	0.990229	1.27319	1.05035	1.00238	1.10867	1.04475	1.02115	1.0464	0.93647	1.10422	1.02354	1.0211	1.08136	0.984836	1.0259	0.963223	0.926284	1.11598	1.04817	1.06431	1.07944	1.0343	1.01026	1.03861	1.06684	1.04229	1.01745	0.980344	1.00232	0.967712	0.985406	1.01999	1.01312	0.93593	1.0474	1.02332	0.971197	1.04303	1.64452	1.05494
715		4	81001..82000	0.976222	0.941926	1.00946	0.82074	1.01526	1.05189	0.98624	1.2981	0.973944	1.07732	1.0321	1.2723	1.07013	1.01276	0.893917	0.903765	0.949225	1.09368	0.930581	0.847279	0.937537	0.894816	0.90159	0.931121	0.903992	1.03104	1.02944	0.924262	0.986246	0.934737	0.990896	0.936803	0.934334	0.934419	0.874146	0.863511	0.946256	0.934636	1.00617	0.940601	0.908386	0.944874	0.881955	0.959618	1.64351	0.982967
716		4	93001..94000	1.03606	0.968269	1.09786	0.937172	0.959034	1.03499	1.08031	1.15215	1.09219	1.06742	1.16377	1.06391	0.929903	1.04936	0.993485	1.11294	1.03655	1.13526	1.08478	1.12509	1.07325	1.05369	1.13923	1.08205	1.0983	1.05929	1.05087	1.0702	1.06715	1.09452	0.990284	1.06735	1.07149	0.953396	1.05581	0.914902	1.03456	0.963425	1.10443	1.07742	1.06532	1.10845	1.05355	1.08481	1.69564	1.04929
717		4	266001..267000	1.09359	1.05028	1.06119	1.01365	1.02314	0.947486	1.09452	0.938867	1.10774	1.01998	1.05343	1.01752	0.915623	0.972357	1.0895	1.07423	1.06729	1.14585	1.03692	1.27278	1.08974	1.10003	1.02021	1.09687	1.11791	1.20204	1.14049	1.07213	1.09104	1.09942	1.02006	1.04078	1.06573	1.08548	1.25215	1.06095	1.16214	1.09282	1.00905	1.05134	1.13265	1.14671	1.14263	1.06156	1.01232	1.09025
718		4	317001..318000	0.850178	0.93268	0.815809	0.89887	0.885064	0.923492	1.0504	0.981131	0.874581	0.973311	1.07446	1.05237	1.10651	0.865141	0.904458	0.934214	1.00322	0.87702	0.957411	0.866598	0.927046	0.891028	0.825254	0.864616	0.732196	1.05182	0.964772	1.02079	0.947116	1.04016	0.881197	0.943087	1.07625	0.88124	1.13528	0.931158	1.09588	0.977368	0.986473	1.00155	1.02373	0.927901	1.01743	1.0002	1.41342	0.962998
719		4	321001..322000	0.98891	1.00561	1.06463	1.04461	1.05626	1.02467	1.02174	1.0065	1.0437	0.983794	1.07394	1.04451	0.977051	0.873953	1.09556	0.971038	0.878058	1.07943	1.10598	0.936769	1.05909	1.11678	0.96534	1.05335	0.998535	1.14884	1.0224	1.0479	1.05308	0.991752	0.985678	1.08497	0.989259	1.0431	0.982372	1.13547	1.00674	1.09802	1.04563	1.09755	1.1608	1.17074	1.02646	1.1107	1.4721	1.14971
720		4	324001..325000	1.09838	1.00918	1.08098	1.22295	1.10113	1.07806	1.09279	0.997845	1.09651	0.987705	1.11331	1.04224	1.02673	0.968155	1.23813	1.07848	1.07592	1.07202	1.06646	1.07412	1.12492	1.16252	1.15505	1.13454	1.05952	1.04671	1.05772	1.08242	1.01071	1.09526	0.958586	1.11436	1.10961	1.06608	1.04526	1.05693	1.07338	1.02569	1.04266	1.10651	1.15405	0.983086	1.13387	0.966053	1.68038	1.1079
721	clade IV unique CNV	4	384001..385000	2.30884	2.21131	2.27787	2.26291	2.21871	0.638923	0.692912	0.607097	0.878531	0.613975	0.720644	0.709074	0.646519	0.626219	0.521063	0.480154	0.446513	0.416677	0.364717	0.399953	0.438189	0.456409	0.398421	0.450942	0.404347	0.322761	0.311774	0.369909	0.32493	0.399813	0.357219	0.333465	0.36106	0.391503	0.424485	0.405604	0.391629	0.379895	0.348697	0.406677	0.382189	0.356174	0.369636	0.379742	0.588433	0.393857
722		4	470001..471000	1.04998	1.10764	1.12203	1.1908	1.11081	1.08408	1.14344	1.06156	1.09327	0.948091	1.11155	1.08811	1.01886	0.981819	1.13171	1.16484	1.07887	1.23401	1.06635	1.10796	1.11787	1.22101	1.23239	1.1898	1.13007	1.09397	1.08795	1.13217	1.13919	1.12878	1.05608	1.16163	1.13446	1.12889	1.23368	1.14315	1.16368	1.07654	1.12259	1.12249	1.08619	1.11252	1.09335	1.13075	1.04684	1.15751
723		4	677001..678000	0.605949	0.668921	0.653651	0.576777	0.616253	1.00884	1.05052	1.11555	0.925113	1.06169	0.889261	1.16879	1.02333	0.952598	0.89535	0.836135	0.832839	0.847623	0.853728	0.805582	0.867721	0.987651	0.877023	0.965306	0.815078	0.900611	0.889996	0.935292	0.867018	0.862033	0.850387	0.901288	0.852388	0.937412	0.750725	0.725372	0.842188	0.853308	0.84505	0.963751	0.863339	0.841993	0.938827	0.841382	1.34126	0.922549
724		4	678001..679000	0.815297	0.773497	0.870786	0.833365	0.838413	1.10325	1.06734	0.926054	0.890386	1.00293	0.999675	0.945043	1.02391	0.956142	0.902705	0.953472	0.985775	0.891587	1.00277	0.926773	0.962738	0.970767	0.971399	0.992586	0.997481	0.995421	0.876606	0.969466	0.959995	0.938037	0.791357	0.935037	0.901678	0.959381	0.995235	0.957988	0.94427	1.01122	1.03183	0.99274	0.948593	0.839722	0.974841	0.84954	0.932481	0.879759
725		4	681001..682000	0.828665	0.857279	0.979349	0.881091	0.796353	0.991817	0.953494	0.920863	0.877515	0.937386	0.908998	0.932185	0.855803	0.945567	0.858837	0.73278	0.797605	0.792712	0.751509	0.76605	0.745875	0.75092	0.814902	0.806857	0.862547	0.780024	0.846748	0.806292	0.862715	0.816338	0.766661	0.862084	0.810469	0.821284	0.780607	0.750994	0.818984	0.751726	0.922892	0.841318	0.878878	0.850055	0.835555	0.761244	0.881364	0.762686
726		4	685001..686000	0.771875	0.861907	0.809356	0.880041	0.813545	1.0086	0.931805	0.894504	0.810672	0.98887	0.896925	0.904629	1.03163	0.809854	0.878627	0.923409	0.98932	0.932242	0.864048	0.870813	0.997871	0.765111	0.814288	0.87435	0.760364	1.02158	0.972195	0.872509	0.920109	0.811213	0.856022	0.951938	0.928302	0.900029	0.942024	0.927242	0.909552	0.944172	0.933188	1.02593	0.880096	0.943094	0.988957	0.952121	1.02135	0.921119
727		4	700001..701000	0.973833	0.927367	0.873973	0.962571	1.00365	1.02509	1.13323	1.13405	0.897357	1.07604	1.01415	1.08804	1.02011	0.857998	0.95722	0.841852	0.94168	0.969144	1.00421	0.904122	0.92825	0.939571	0.924772	0.907394	0.860571	0.952412	0.991068	1.03897	1.04131	1.06392	1.00342	1.07277	1.02726	0.989994	0.945498	0.90397	0.897157	0.955031	1.02343	0.972164	1.05036	1.03864	0.888793	0.999589	1.59377	0.985586
728		4	711001..712000	0.673174	0.686221	0.76545	0.802585	0.752247	0.961202	0.873415	0.86692	0.817184	0.949283	0.944455	0.906459	0.890969	0.894445	0.815111	0.901395	0.844526	0.79362	0.900069	0.944337	0.856513	0.927897	0.905239	0.849363	0.894333	0.930893	0.920106	0.92759	0.9351	0.880598	0.983069	0.977646	0.976526	0.87835	1.01307	0.976701	0.94113	1.00385	0.974088	0.974158	0.945362	0.894007	0.883595	0.918539	0.90465	0.945317
729		4	722001..723000	0.995024	0.83899	0.951056	0.862342	0.896853	1.02035	1.05194	1.1311	0.989063	1.13145	1.01704	1.06075	0.98925	0.986067	1.16555	0.994942	0.938763	0.994179	0.872848	0.927646	0.918196	0.995034	0.978687	0.973191	0.82226	0.987318	1.10222	1.01563	0.973376	0.977795	0.852596	0.967502	1.02566	0.969065	0.948246	0.915537	1.01624	0.97215	1.0138	1.08623	1.06299	0.981521	1.00805	1.03977	1.51115	0.985425
730		4	725001..726000	1.06939	0.978964	0.973641	0.899177	0.971596	0.928539	0.993558	0.990714	1.20437	0.974779	1.23412	0.971459	0.910219	1.04553	1.26793	1.04786	1.12883	1.10717	1.09223	1.30294	1.15994	1.231	0.964774	1.18301	1.14912	1.20097	1.22471	1.14599	1.15822	1.14228	0.993629	1.20439	1.23956	1.27678	1.21413	1.15182	1.1747	1.18606	1.1073	1.05806	1.19291	1.09326	1.1243	1.1371	1.63584	1.15739
731		4	743001..744000	0.940821	0.74412	0.93512	0.926251	0.99555	1.11927	1.08694	1.11367	0.920285	1.18243	0.959757	1.07253	1.13507	0.943201	0.871438	0.890055	0.952232	0.943714	0.985275	0.918806	0.912641	0.935592	1.00356	0.828753	0.856154	0.877733	0.894518	0.910525	0.947862	0.847358	0.986876	0.935783	0.934863	0.970173	0.863899	0.852003	0.91594	0.910335	0.893477	0.903769	0.896309	0.979239	0.902577	1.00829	1.05932	0.988357
732		4	758001..759000	0.913058	1.00507	0.973357	0.966892	0.908541	1.02999	1.09147	1.06911	0.807101	1.0503	0.965348	1.05864	1.0628	0.958303	0.966624	0.985754	0.846268	0.992339	0.90996	0.996671	0.840381	1.00342	0.943573	1.04646	0.76558	0.936501	0.999112	0.943669	0.965458	0.957276	0.997489	0.933698	1.04612	1.00112	0.980349	0.91075	1.02743	0.880364	0.936126	0.981014	1.00516	0.988212	1.01387	0.891774	1.14321	0.944137
733		4	771001..772000	1.03613	1.10702	1.09715	0.965266	1.0709	1.07597	1.14739	1.0923	1.03388	0.947344	1.05688	0.98347	1.13361	0.913174	1.11709	1.18149	1.10653	1.15898	1.01735	1.06645	1.08794	0.98646	1.14753	1.09462	1.02036	1.09303	1.06589	1.14092	1.0277	1.05555	1.00414	1.13987	1.15138	1.14747	1.06336	1.09742	1.05671	1.12512	1.16726	1.04396	1.12573	1.03169	1.1054	1.06509	1.64901	1.1303
734		4	775001..776000	1.0435	1.0084	1.08015	1.20421	1.09997	0.967893	0.958901	1.02543	1.04926	1.23987	1.06246	1.0981	1.05267	1.10948	1.09227	0.999248	1.1288	1.06734	1.08725	1.07502	0.994613	0.989568	0.977184	1.09415	0.990448	1.07627	1.09882	1.07992	1.17008	0.968079	1.06212	1.04351	0.995432	1.13182	0.925268	1.12085	1.06665	1.03054	1.0168	1.10348	1.08336	1.09487	0.973019	1.11028	1.03056	1.10258
735		4	777001..778000	1.02591	1.06202	0.996187	1.01342	1.11569	1.01069	1.05883	1.08786	0.898695	1.03537	0.994364	1.09027	1.07502	0.846059	0.899294	0.882748	1.00351	0.904207	0.966668	0.953829	0.936869	0.992613	0.844504	0.92948	0.928376	0.864641	0.982413	0.882279	0.929127	0.93989	0.965348	0.891771	0.894092	0.996916	0.911416	0.869091	0.976455	0.924719	0.953111	0.941	0.942675	1.00598	0.933114	0.951069	1.18808	1.03631
736		4	780001..781000	0.979329	0.93058	0.95388	0.989972	0.980786	1.0796	1.0921	1.18839	1.00646	1.08443	1.008	1.03557	0.975326	0.91951	0.941267	0.89469	0.883244	0.9864	0.995101	0.898457	1.02257	0.992941	0.951427	0.94409	0.898056	0.923672	0.926356	1.02148	1.01192	0.936839	1.05567	0.9823	0.97441	1.08878	0.873574	0.928085	0.959023	0.932032	0.922044	0.968204	0.899892	0.995128	0.974605	1.02911	1.32906	0.979392
737		4	814001..815000	0.945414	0.928558	0.897716	0.906253	0.941388	1.04837	0.940684	1.095	0.931576	1.11303	0.954354	1.20637	1.03375	0.987255	1.0189	0.885419	0.776023	0.860625	0.916756	0.95488	0.883756	0.937917	0.938148	0.937628	0.905458	1.02509	0.942347	0.988216	0.887924	0.948104	0.920934	0.90881	0.8873	1.00629	0.820252	0.828394	0.986962	1.00438	0.927322	0.977216	0.977245	0.907153	0.973287	0.850443	1.18137	0.836861
738		4	815001..816000	1.03992	1.04283	0.918212	1.15558	1.12804	0.982396	1.09073	1.07044	1.05299	0.98135	1.03801	1.15545	1.1275	1.00741	1.2209	1.04779	0.968882	1.05746	1.09222	1.0839	1.06042	1.05239	0.967203	1.12274	1.01825	1.07302	1.08273	0.983788	0.993742	1.10088	1.0122	1.09813	0.980335	1.05021	0.916429	1.00734	1.05324	0.962153	0.977794	0.964026	0.946268	0.916218	0.971754	0.994662	1.80955	1.07404
739		4	832001..833000	1.19776	1.23586	1.06411	1.16613	1.05537	1.05942	1.08428	1.01544	1.30889	0.936296	1.12396	1.07678	0.871424	1.13822	1.17001	1.15113	1.14162	1.22344	1.03745	1.16382	1.22947	1.19197	1.05835	1.14762	1.17626	1.11283	1.06676	1.12424	1.14259	1.11205	1.19956	1.14241	1.01115	1.15419	1.20586	1.16163	1.12552	1.16114	1.08106	1.06646	1.12028	1.07556	1.13599	1.05369	1.20224	1.18942
740		4	838001..839000	1.18515	1.14674	1.107	1.1556	1.05115	0.959312	1.23671	1.05923	1.0461	1.01175	1.06805	1.16591	1.15102	1.09383	1.18242	1.13681	1.15482	1.24673	1.14166	1.05562	1.28252	1.15689	1.13404	1.11854	1.07111	0.998585	1.0434	1.10361	1.13799	1.13375	1.12372	1.09531	1.13443	1.14979	1.06186	1.06096	1.05028	1.09137	1.07921	1.10479	1.02702	1.14448	1.08942	1.04578	1.26945	1.0714
741		4	843001..844000	0.990148	0.923109	0.907709	0.949757	0.839787	1.12341	1.04801	1.10772	0.800396	1.1331	0.920809	1.09789	1.05295	0.97194	0.910877	0.954948	0.931998	0.958855	0.887363	0.874565	0.893542	0.979612	0.930596	1.00138	0.841157	0.744367	0.767053	0.822114	0.896108	0.864854	0.928264	0.842614	0.829491	0.949117	0.836458	0.793545	0.825754	0.821935	0.916722	0.885376	0.884403	0.868818	0.867056	0.950678	1.27229	0.870614
742		4	845001..846000	0.869116	0.903911	0.951634	0.936944	1.00824	1.04762	0.9754	1.02065	0.992182	1.1311	1.03198	0.988532	1.0292	0.840735	1.0014	0.946814	1.01529	0.806789	1.00135	1.07211	0.905188	0.923606	1.02953	0.891098	0.98777	0.969571	1.0094	1.01873	1.00537	1.01752	1.06162	1.06043	0.931524	1.13383	1.15166	1.05573	0.998085	1.01363	0.96606	0.991554	1.0078	0.990851	1.05583	1.02084	1.04183	1.04002
743		4	848001..849000	1.01898	0.917739	1.01507	0.93737	1.00888	1.10846	1.00628	1.07155	0.900734	1.10449	1.03087	0.85312	1.09466	0.950289	0.899756	0.949363	0.919753	1.02738	1.01492	0.941152	0.938437	1.06745	1.03781	1.01243	0.919622	0.984793	0.982684	0.960467	0.943942	1.02054	1.04894	0.986871	0.976881	1.01687	0.963924	0.999211	0.955775	0.95482	1.00439	1.03508	1.03819	1.03684	0.998529	0.966714	1.27782	1.04644
744		4	849001..850000	0.999889	1.05956	1.10467	0.91978	1.08132	0.99627	1.05237	1.03934	0.93754	1.04071	1.02278	0.897806	0.983176	1.00682	1.15763	1.04028	0.976336	1.01926	0.95563	0.901652	0.907741	0.95572	0.983516	0.869311	0.999176	1.03919	0.993416	0.942285	1.00365	1.01813	1.10073	0.970361	0.975914	1.018	1.10197	1.04763	1.01885	0.992504	1.00799	1.1033	1.04997	1.01592	1.08882	1.01188	1.38915	0.955105
745		4	858001..859000	0.659694	0.562828	0.717112	0.66235	0.731736	0.631593	0.618291	0.732943	0.502413	0.682627	0.576006	0.647597	0.474897	0.616432	0.753312	0.706582	0.586952	0.580036	0.663366	0.663148	0.677834	0.725422	0.707736	0.723712	0.673961	0.617097	0.637404	0.622043	0.613363	0.682388	0.647733	0.618364	0.632868	0.619974	0.78705	0.717641	0.627273	0.676979	0.608558	0.668768	0.635696	0.607974	0.709099	0.689442	1.41015	0.569605
746		4	861001..862000	0.928951	1.14462	1.06437	0.966594	1.1058	0.927393	0.953168	1.03554	1.18758	1.09343	1.12008	1.04177	0.951244	1.02268	1.10083	1.04096	1.10786	1.12337	1.14958	1.27249	1.16507	1.08142	1.03352	1.10788	0.99742	1.05707	1.14554	1.11916	1.14548	1.09216	1.16562	1.02076	1.07531	1.15088	1.04946	1.1467	1.10949	1.10401	1.07208	1.08378	1.10646	1.10561	1.06731	1.07684	1.29274	1.04946
747		4	865001..866000	1.19847	1.03675	1.04409	1.00558	1.02157	1.25332	0.938014	1.12792	1.00678	1.0503	1.07852	1.05498	1.15418	1.18718	1.21849	0.958146	1.0426	1.01538	1.0809	0.949898	0.962386	1.06169	1.11284	1.17871	1.14301	1.12625	1.03584	1.09224	1.08113	1.05787	1.02634	1.10945	1.15313	1.11422	1.1298	1.04853	1.02882	1.04682	1.15229	1.0651	1.12024	0.996161	1.07984	1.01207	1.316	1.06466
748		4	867001..868000	1.03913	1.05843	0.960147	1.04877	1.04957	0.860432	1.00674	1.1606	0.96009	1.08283	1.0333	1.02004	1.13527	0.994249	0.959008	1.08032	0.994616	1.07876	1.04074	0.965149	1.02882	1.0012	0.974023	0.991943	0.819336	0.948792	0.978192	1.04794	1.05339	1.0392	1.06646	1.11905	0.989044	1.08261	0.861964	0.91738	1.09091	0.963785	0.952575	1.06788	1.01371	0.950706	0.95797	0.986942	1.50896	1.05832
749		4	868001..869000	1.11659	1.12628	0.999708	0.986137	0.986556	1.02523	0.990796	0.995236	1.14517	0.977425	1.06192	1.11912	1.1421	0.932357	1.07706	1.16576	1.03757	1.12219	1.01299	1.01349	1.2335	1.04418	1.17362	0.945286	0.929711	0.948589	1.03292	1.02763	1.0693	1.00147	1.05514	1.05458	1.01166	1.09891	1.13224	1.11065	1.0707	1.10866	1.01534	0.985752	1.02319	1.08599	1.14706	1.04361	1.51063	1.03656
750		4	871001..872000	1.17018	1.04866	1.08391	1.15644	1.21779	1.06599	1.03091	0.977391	1.18555	1.06392	1.07127	1.06812	1.07824	1.04217	1.17384	1.14277	1.12677	1.13587	1.00988	1.0528	1.17474	1.16039	1.19402	1.0452	1.12174	1.12237	1.12098	1.04977	1.08686	0.97963	1.14453	1.09198	1.05518	1.03557	1.03246	1.12633	1.02313	1.11403	0.98291	1.10743	0.991275	0.946572	1.01571	1.0873	1.30484	1.07244
751		4	873001..874000	1.1022	1.06827	1.08871	1.14363	1.08378	0.984846	1.07485	0.977791	1.14467	0.933657	1.02827	1.09235	1.11761	1.00178	1.19804	1.10339	1.0305	1.15356	1.10067	1.05121	1.08439	1.20412	1.24778	1.15062	1.10383	1.08973	1.11862	1.05158	1.04323	1.15409	1.13102	1.07581	1.07711	1.19448	1.15096	1.1918	1.23048	1.10539	1.08986	1.20556	1.16557	1.0939	1.15567	1.07594	1.44993	1.15552
752		4	875001..876000	1.13316	0.962551	0.899138	0.933019	0.915725	0.935738	0.952918	1.15849	0.816797	1.13855	0.954999	1.1049	1.07321	0.835299	0.951132	0.962227	0.866695	1.05377	0.972625	0.889796	0.836102	0.955009	0.901327	0.858371	0.897257	1.05602	0.960415	0.89465	0.945406	0.962429	0.95367	0.990122	0.908561	0.979432	0.953348	0.858149	0.918209	0.902461	0.954254	0.897502	0.978171	0.97615	0.91366	0.916751	1.48643	0.944029
753		4	876001..877000	1.0267	0.955935	1.02884	1.01559	0.874547	0.974646	1.05973	1.14182	1.03749	1.10153	1.00021	1.05332	0.959261	0.929241	0.819102	0.895951	0.934145	0.943857	0.959378	0.970594	0.879599	0.945636	0.973428	0.995486	0.924469	0.989214	1.03317	1.0192	0.983417	1.01894	0.942507	1.02894	1.0444	1.03537	1.05216	1.00249	1.03525	0.917807	1.00883	1.00707	1.00705	1.04213	1.05081	1.03906	2.32526	1.03388
754		4	877001..878000	0.946429	1.00942	1.00122	1.00854	0.873126	0.987461	1.00559	1.12871	0.972767	0.996007	0.992521	1.06657	1.04841	0.951198	0.850736	0.973182	0.83928	0.877821	1.04274	0.925218	0.931058	0.997839	0.945768	0.860692	0.946394	0.981345	0.972593	0.920979	0.985873	0.925076	1.00754	0.977018	1.04885	1.1248	1.04598	0.937798	0.97221	1.03214	1.03381	0.975013	0.970492	1.01543	1.02087	0.993228	1.81914	1.01015
755		4	878001..879000	1.11452	1.02376	0.846269	0.904439	0.960705	1.1263	1.04004	1.08188	0.925846	0.955416	1.05175	1.03418	0.944064	1.03175	0.954543	0.929822	0.864913	0.927665	1.04705	0.972296	0.946266	1.06385	1.01113	0.828155	0.964377	1.00825	0.931159	0.950662	0.996935	0.947504	0.981499	0.992454	1.00424	1.02407	1.02127	0.97466	1.00481	1.02209	1.08753	1.04216	1.05378	0.986125	0.964101	1.02375	1.97922	0.972187
756		4	879001..880000	1.04751	0.816725	0.79543	0.919532	0.950149	0.994415	0.940033	1.14576	0.859495	1.06209	1.0862	1.00845	1.33293	0.945112	0.798554	0.977432	0.964527	0.891229	1.06064	0.787135	0.85441	0.847255	0.858017	0.734325	0.842263	1.0059	1.08058	1.0022	1.13684	0.960742	1.05369	1.06516	1.02621	1.06021	1.01399	1.00999	1.04353	1.0284	1.06775	1.07302	1.0161	1.10196	1.05997	1.06623	2.37965	1.0703
757		4	885001..886000	1.04779	1.07926	1.08093	1.02163	1.04542	0.926702	1.01544	0.980079	1.04512	1.07192	1.07933	0.990615	0.969369	1.00911	1.05685	1.086	1.07975	1.01965	1.023	0.957434	1.09745	1.05373	1.13386	0.954866	1.02613	1.02572	1.01431	0.973485	1.00753	1.04603	0.951807	1.08049	1.00265	0.994018	1.01918	0.925151	1.03382	1.03077	1.05737	1.05032	0.967282	0.950378	1.067	0.968903	1.3658	1.03892
758		4	889001..890000	1.04299	1.06868	0.992353	0.946973	0.984487	1.14893	1.06361	1.04562	1.08407	1.03094	1.08743	0.96923	1.09359	1.06737	1.012	1.09967	1.19179	1.06999	1.03168	1.08615	1.03728	0.88744	1.02687	1.00745	1.01663	0.980037	0.956155	0.896513	1.01197	0.925335	1.07726	1.04253	0.982343	1.01016	1.14513	1.003	0.972141	1.12495	1.00557	1.00301	0.989302	1.02796	1.03093	1.05956	1.48726	1.10227
759		4	890001..891000	1.1053	0.973628	0.987753	1.00832	0.952678	0.951098	1.12015	1.10998	1.04311	1.10256	1.01448	1.15312	1.11786	1.01053	1.00398	1.15916	1.12051	1.10549	1.07865	1.0811	1.03811	0.99668	1.04342	0.969974	0.965984	1.00142	1.07321	0.9766	1.0871	1.0681	1.07727	1.05543	1.03076	1.03031	1.08589	1.02854	0.99515	1.02617	1.05668	0.971642	1.04731	0.974533	1.07743	1.10146	1.40551	1.11119
760		4	891001..892000	1.11275	1.02188	0.924862	0.983273	1.02119	1.02099	1.07326	1.0485	1.00132	1.02947	1.0169	0.997117	1.15694	1.13566	0.982956	1.04586	1.04839	0.987189	1.10978	1.04741	1.11431	1.06621	0.905297	1.05596	0.888494	0.936988	1.01588	0.957424	1.08365	0.959442	1.05477	1.00006	0.918477	1.07454	1.14458	0.990687	0.98885	1.01684	0.989456	0.98202	0.987551	1.07582	1.03765	1.0363	1.11563	1.08223
761		4	892001..893000	1.11238	1.07049	1.08457	1.09705	0.98476	1.01023	1.13867	0.903674	1.14151	0.926399	1.05619	1.03829	1.01838	0.878026	0.992513	1.09278	0.916249	1.07793	1.0452	1.1275	1.10844	1.0587	1.09151	1.04174	0.985706	0.97097	1.04387	1.03125	1.03429	1.02508	1.10694	0.974095	1.03015	1.0888	1.0667	1.01833	0.952263	1.13544	1.07939	1.05538	1.11014	0.967044	1.09437	1.08281	1.30264	0.952343
762		4	896001..897000	1.25317	1.12787	1.2136	1.13024	1.07779	1.08269	1.14288	1.08054	1.06103	1.0603	1.03339	1.012	1.1001	0.975687	1.1776	1.22074	1.18123	1.20552	1.04863	1.02762	1.20473	1.21722	1.04017	1.07067	1.03015	1.12974	0.993601	1.02365	1.09742	1.04688	1.18343	1.06916	1.14433	1.07233	0.937934	1.05066	1.03853	1.0649	1.04815	1.09389	0.97792	1.09987	1.12073	1.11928	1.33575	1.04814
763		4	897001..898000	1.23033	1.09893	1.2938	1.2076	1.30154	1.14952	1.15892	1.1275	1.26431	1.02684	1.21243	1.10259	1.23439	1.0328	1.30909	1.23799	1.15172	1.31785	1.23158	1.40136	1.37867	1.35512	1.17603	1.29295	1.33017	1.17654	1.11414	1.24257	1.18958	1.13137	1.2765	1.1112	1.20724	1.18026	1.0172	1.18401	1.10839	1.13705	1.12842	1.13683	1.12122	1.21397	1.1004	1.21038	1.34563	1.1959
764		4	898001..899000	1.22918	1.07595	1.16756	1.10929	1.10898	1.20036	1.15789	1.18409	1.25893	1.14268	1.07996	1.06468	0.988185	0.886801	1.20445	1.2338	1.27276	1.25228	1.13241	1.32663	1.26183	1.21635	1.08512	1.1298	1.19337	1.17443	1.10747	1.06862	1.20434	1.10198	1.19668	1.15634	1.11742	1.18317	0.942331	1.13481	1.06852	1.15105	1.13807	1.04007	1.16973	1.14015	1.21688	1.17207	1.25825	1.1625
765		4	899001..900000	1.05103	1.05547	1.16613	1.01836	1.06744	1.02131	1.04498	1.11014	0.921817	1.07983	1.04928	1.02265	1.01016	0.933767	0.940331	1.16682	1.0086	1.11424	1.09355	1.22431	1.07589	1.02219	1.04868	1.15766	1.06947	1.06335	0.980831	0.993674	1.09374	1.00684	1.19437	1.04902	1.08748	1.08557	1.07868	0.947898	1.02354	1.01731	1.07333	1.0752	1.04993	0.971198	1.08036	1.12835	1.69041	1.07483
766		4	903001..904000	0.912686	1.04208	0.920027	0.769109	0.851178	0.961298	1.10783	1.10035	0.992005	0.982091	1.06797	1.15523	1.21834	1.02078	1.21107	1.05294	1.10889	0.953931	1.05012	1.02048	1.14835	1.07329	1.12672	1.04762	0.959811	1.02196	1.10867	0.960459	1.0405	1.04897	1.09919	0.999803	1.00694	1.08611	1.01843	0.999419	1.07235	1.02323	1.08923	1.09156	1.12987	1.05427	1.00083	1.13321	1.76938	0.993408
767		4	904001..905000	1.04546	1.12935	1.13206	1.10316	0.95025	1.07978	1.00636	1.20743	1.10889	1.19799	1.14989	1.00183	0.996873	0.921031	1.16868	1.20588	1.09111	1.07898	1.10675	1.09868	1.10756	1.26063	1.10486	1.10597	1.0681	1.09412	1.04481	1.07907	1.07227	1.13287	1.12057	1.11404	1.07361	1.1761	1.16791	1.0611	1.11956	0.963164	1.12845	1.04561	1.08344	1.11457	1.10333	1.13417	1.55983	1.00015
768		4	905001..906000	1.10027	1.15238	1.10558	1.21456	1.13717	1.19025	0.962373	1.24116	1.16081	1.10936	1.06765	1.084	1.01949	1.01345	1.10702	1.15586	1.04875	1.18919	1.00962	1.14207	1.10497	1.16343	1.07052	1.06399	1.1029	1.11167	1.11808	1.03861	1.14814	1.08282	1.07419	1.11616	1.09166	1.15508	1.17031	1.25329	1.11887	1.04218	1.17572	1.08668	1.06991	1.03013	1.05364	1.10914	1.40421	1.19252
769		4	906001..907000	0.841588	0.986401	0.869423	0.976098	0.925828	0.985082	0.994101	1.11264	0.97579	1.17792	0.998239	1.07253	1.02297	1.03694	0.873558	1.02721	1.00422	1.08639	0.984501	0.976396	1.07283	0.97445	0.924401	0.924577	0.967477	1.01751	0.97365	0.97707	1.13157	0.983704	0.979351	0.986298	0.994168	0.979841	1.01454	0.975363	1.05424	0.951184	0.979365	0.955699	0.96546	0.991885	0.976234	1.0136	1.58988	1.04747
770		4	907001..908000	0.951182	0.963147	1.06989	0.98029	1.06916	1.04693	1.05144	1.0578	1.11983	1.11255	1.03108	0.955107	1.10357	0.963238	1.07003	1.12755	1.18178	1.10579	1.06339	1.075	1.19859	1.05358	1.00664	0.963041	1.08283	1.05457	1.08668	1.06198	1.03475	0.982395	0.989281	0.972911	1.01987	1.07834	1.1961	1.1093	1.00372	1.12024	1.09326	1.00744	1.08443	1.05276	1.00253	1.10047	1.49347	1.05215
771		4	908001..909000	1.01749	1.06995	0.980889	1.04258	1.02305	1.0446	0.996212	1.1742	0.869133	1.19759	0.984967	0.975255	1.0608	0.988507	1.04307	1.04594	0.962927	0.937834	0.969772	0.889291	1.06843	0.947666	1.03196	0.934184	1.0259	0.988515	1.00131	0.977248	1.03163	0.995835	1.01403	0.944608	0.908346	1.11152	1.06516	0.946521	0.984741	1.0626	1.03178	0.916331	1.01449	1.03182	0.960735	0.998937	1.94132	1.0469
772		4	909001..910000	1.11946	1.20013	1.11027	1.15068	1.01942	1.02455	1.09086	1.10922	1.02578	1.14831	1.07908	1.05059	1.10314	0.982264	1.06714	0.984015	1.0868	1.12298	1.08338	1.02131	1.21807	1.1746	0.953017	1.06094	1.10621	1.01765	1.2314	1.12053	1.09105	1.1384	1.21961	0.985023	1.07418	1.23271	1.10331	1.06681	1.10406	1.23367	1.12055	1.06329	1.10043	1.1463	1.11732	1.11177	1.72256	1.11624
773		4	910001..911000	1.0156	1.05735	1.17299	0.949232	1.03356	1.07037	1.0664	1.07658	0.919923	1.1026	1.10108	1.05866	1.03471	1.06759	1.08811	1.00766	1.07104	1.07819	1.08273	1.08265	1.0749	1.03027	1.07283	0.954802	0.986891	1.14879	1.12621	1.06139	0.970183	1.06943	1.08569	1.02669	1.03852	1.2054	1.17851	1.10408	1.13092	1.12581	1.18824	1.06817	1.02572	1.0153	1.13546	1.08621	1.80151	1.01402
774		4	911001..912000	1.13077	1.03111	1.07629	1.00981	0.938671	1.05532	1.08054	0.952782	0.991916	1.00723	1.10091	1.05048	0.911195	1.01777	1.01131	1.0925	1.02461	1.25539	1.12318	1.11848	1.10811	1.03637	1.12631	1.06563	0.909094	1.16771	1.09107	1.06412	1.03848	1.02182	1.10856	0.987281	1.05023	1.22731	1.01689	1.21068	1.03138	1.07445	1.13793	1.0619	1.08018	0.990012	1.12946	1.0571	1.60044	1.043
775		4	912001..913000	1.02487	0.884555	0.961981	1.02963	0.982847	1.13987	1.11242	1.19927	0.836244	1.15563	0.994568	1.10914	1.10246	1.04542	0.947686	1.00497	1.00672	1.01313	1.04968	0.955826	1.046	0.934241	0.970686	0.844813	0.983063	0.925832	0.992165	0.960636	1.03929	1.09629	1.0058	1.02138	1.07911	1.03646	1.06934	1.02403	1.06945	1.03782	1.00022	1.03896	0.99207	0.988447	1.10085	1.07029	1.93919	1.03106
776		4	913001..914000	0.985877	1.04406	0.98181	1.00729	0.918145	1.06801	1.02974	1.13937	0.963435	1.10707	1.00574	1.06753	1.09909	0.9527	1.13178	1.1164	1.0826	1.05116	0.991241	1.00931	1.02859	1.11648	1.06409	1.04825	1.01827	1.04125	1.04827	1.01839	1.05445	1.04421	0.926392	0.998054	1.00101	1.09489	1.07609	0.940891	1.02867	0.977098	0.988929	0.977776	1.05427	0.818759	1.0374	1.13809	2.73809	1.03238
777		4	914001..915000	1.02672	1.12821	0.933923	1.02186	1.0122	1.01398	1.07027	1.04421	0.999927	1.08174	1.05501	1.18332	1.01439	0.929222	1.06166	1.00403	1.09058	0.986842	1.03857	0.977258	1.05352	1.08076	1.0193	1.03845	1.00965	1.13599	1.10462	1.08471	1.13344	1.17608	1.03374	1.03822	1.06491	1.15114	0.970015	1.02777	1.10192	1.11518	1.09709	1.08057	1.06535	1.06774	1.13989	1.07862	1.54225	1.02057
778		4	915001..916000	1.09787	1.06103	1.02311	1.02265	1.01341	0.939263	1.12567	1.09828	1.04071	1.04646	1.00602	1.09329	0.903888	0.882042	1.0678	0.898236	0.99094	0.848591	1.01797	0.963246	0.926195	0.997631	0.970764	0.995224	1.02298	0.979185	1.13149	1.02126	1.01192	1.04115	1.05931	0.922433	1.04906	1.04842	0.979558	1.04696	1.05417	0.971378	0.983848	0.975791	0.954963	1.03237	0.988485	1.05868	1.71345	1.00455
779		4	916001..917000	1.05884	0.94925	1.0689	1.03336	0.916872	0.960108	0.99083	0.848836	0.926467	0.915438	1.03138	0.848603	1.00778	0.839139	1.00503	0.980394	1.03381	0.997788	0.966248	1.05901	1.08958	0.899194	0.967633	0.966657	0.987638	0.976832	1.05653	1.04307	0.983073	0.993171	1.10152	1.00793	1.00308	1.07701	0.998468	1.07862	1.0334	1.0879	1.03597	0.959345	1.01718	1.03353	0.987499	1.15194	1.7904	1.0888
780		4	917001..918000	1.15222	1.05577	1.06637	1.1431	1.14559	0.919311	0.89038	0.825941	1.05625	0.822287	1.02703	0.932496	1.02626	0.845531	1.07533	1.01421	0.95442	0.848077	1.0785	1.1594	1.07457	0.970703	1.04998	1.02826	1.07456	1.06624	1.08487	1.02649	1.03486	1.01091	0.997241	1.06072	1.01379	1.10288	1.01109	1.03852	1.08705	1.04725	1.03176	1.00631	1.03083	1.06584	1.00282	1.17595	1.85419	1.09014
781		4	918001..919000	1.22412	1.05407	0.988185	1.09211	1.06356	0.978014	1.05569	1.05724	1.10485	0.998498	1.05216	1.03282	1.00978	1.0783	0.908946	1.03428	1.00262	0.961233	1.13454	1.0404	1.11588	1.12611	1.07545	1.04215	1.10672	1.03778	1.12176	1.02596	1.13398	0.987456	1.12824	1.04465	1.039	1.11529	1.05544	1.06861	1.05562	1.09111	1.06049	1.03932	1.05492	1.08641	1.16877	1.1318	1.72219	1.00107
782		4	921001..922000	1.06298	1.12223	1.0047	1.05475	1.11383	0.998605	1.04382	0.967101	1.1367	1.08474	1.09273	1.01618	1.14384	0.99847	1.04969	0.98077	1.04279	0.939806	1.15087	0.996261	1.05081	1.19071	1.04476	0.924786	1.09547	0.985198	1.07699	1.12695	1.14166	1.04743	1.09316	0.994029	0.945853	1.11551	1.12947	1.02	1.07447	1.09344	1.08322	1.05814	1.07141	1.02767	0.966095	1.09516	1.50929	1.09268
783		4	922001..923000	1.08951	1.13647	1.07024	1.15305	1.07752	1.03154	1.04777	0.955255	1.08328	1.07341	1.14538	0.962972	1.00737	1.01722	1.10442	1.1034	1.04105	0.988348	1.11089	0.965128	1.0018	1.07611	1.13044	1.09423	1.14295	1.09471	1.08327	1.19854	1.12121	1.06302	1.05462	1.09728	1.14888	1.14163	1.10342	1.11229	1.09987	1.06343	1.16791	1.10678	1.17841	1.16482	1.06346	1.19444	1.73314	1.15105
784		4	923001..924000	1.02899	1.00605	1.09802	1.03263	1.04146	1.08543	0.961046	0.927305	1.08257	0.98036	1.01659	1.03014	1.28107	1.02911	0.987575	0.985632	1.00545	1.03954	1.07308	0.999289	1.08866	0.909886	0.88676	0.929172	0.907733	1.02278	1.12469	1.02331	1.05442	0.99177	1.01119	1.00316	1.00545	1.03549	1.00759	0.986415	0.952302	1.02082	1.09253	0.994326	1.10696	1.0636	1.08996	1.14576	1.39095	1.0688
785		4	925001..926000	1.01497	0.931063	1.08541	0.99452	0.995425	0.969004	1.03553	0.989921	1.02347	1.03887	1.08522	1.11453	1.17585	1.06006	1.06669	1.05444	1.11596	1.09705	1.16193	1.01465	0.987623	1.03463	1.01643	0.980125	1.08582	1.04289	1.06581	1.15549	1.15278	1.05197	0.909256	1.04014	1.06319	1.18129	1.06764	1.00722	1.02266	1.03931	1.04129	1.1144	1.08516	1.03545	1.08207	1.24377	1.33815	1.05122
786		4	926001..927000	0.923517	1.01099	1.03636	1.01084	0.965335	0.947101	1.09836	0.846089	1.0415	1.05346	1.02587	1.11715	1.02867	1.05859	0.907205	1.03724	1.0406	1.05618	1.10243	1.05351	1.02215	1.01938	0.957271	1.12437	0.982721	1.07401	1.00312	1.03416	1.09624	1.00787	0.898332	1.09426	1.08242	1.22245	1.06287	1.01679	1.0448	1.09742	1.06543	1.06277	1.15668	1.06683	1.14785	1.24959	1.46088	1.09312
787		4	927001..928000	1.00244	0.976639	1.11465	1.13824	1.13144	1.05286	1.03462	0.878532	0.878958	1.10353	0.941056	0.973532	1.08737	1.12093	0.921785	1.08643	1.03407	0.949091	1.20653	1.01604	0.899998	0.99199	0.977087	1.15409	0.994996	1.08536	1.01715	1.12174	1.18744	1.06892	0.992609	1.08166	1.12822	1.10769	1.12257	1.11354	1.02825	1.07039	1.09904	1.0178	1.05244	1.02658	1.08318	1.23045	1.90691	1.08774
788		4	928001..929000	0.722066	0.91155	1.01982	0.937964	1.01274	0.947285	0.988384	0.998137	0.957221	0.968349	1.09851	0.927172	1.05665	0.907886	1.04158	1.05068	1.01754	0.891181	1.1966	0.978571	0.937489	1.00265	0.924069	0.98394	1.00917	1.11311	1.12116	1.10447	1.06805	1.01105	0.975704	1.10493	1.08706	1.05088	1.10412	1.08085	1.02111	1.02347	1.14186	1.11101	1.06857	1.11901	1.07483	1.16622	2.23139	1.24299
789		4	929001..930000	0.974316	1.05795	0.98587	0.978248	1.06085	0.988738	1.04829	0.852576	0.952136	1.10965	1.05256	1.11809	0.978925	1.00041	0.887166	0.929201	0.856628	0.965702	1.11751	1.01771	0.961267	0.966579	0.967886	0.942105	0.838452	1.02259	1.11368	1.12949	1.07919	1.08282	1.00026	1.05064	1.10545	0.970011	1.0324	1.07165	1.06908	1.05104	1.11697	1.05741	1.03597	1.02014	1.07995	1.13176	1.57269	1.15495
790		4	930001..931000	1.03324	1.13854	1.04884	1.09914	1.19686	1.03339	0.975575	0.849992	1.17158	0.978738	1.12386	1.05459	1.01686	1.0804	1.12022	1.1169	1.13466	0.974378	1.24279	1.081	1.10061	1.08208	1.00511	1.07481	1.08177	1.16861	1.15773	1.18269	1.19554	1.141	1.15059	1.20349	1.26286	1.22067	1.2519	1.19965	1.19217	1.20334	1.25588	1.15077	1.20255	1.2386	1.26557	1.39933	1.96174	1.1962
791		4	931001..932000	1.08405	1.02771	1.08787	1.14624	1.07389	1.03283	1.00991	0.827126	0.907947	1.11802	1.05383	0.982069	1.16513	0.947608	0.940165	1.00526	1.06676	1.11997	1.22009	1.03259	0.995306	1.00244	0.97135	0.992903	1.05807	1.10935	1.20688	1.17676	1.16208	1.1035	1.06081	1.15235	1.27351	1.19835	1.31103	1.12838	1.0981	1.11007	1.15925	1.09362	1.15948	1.0973	1.14885	1.33239	1.76954	1.05838
792		4	932001..933000	1.14408	1.16129	1.0634	1.18264	1.21016	1.13183	1.06833	0.794674	1.07287	1.05268	1.05099	0.948469	1.0194	0.946958	0.972545	1.10761	1.06147	1.09049	1.39754	1.09608	1.01816	1.1094	1.11494	1.11436	1.14316	1.15419	1.18302	1.2204	1.15176	1.08086	1.06665	1.20054	1.21432	1.28098	1.08457	1.05225	1.10926	1.1575	1.16359	1.06585	1.0851	1.11139	1.11838	1.27889	1.4187	1.21662
793		4	933001..934000	1.08205	1.20254	1.11203	1.13716	1.15297	0.982116	1.11929	0.780272	1.09702	0.942389	1.18373	0.984921	0.931422	0.96745	1.02809	1.1299	0.954126	1.04972	1.32187	1.02692	0.95525	1.03484	1.12295	1.02192	1.13572	1.16642	1.14704	1.32096	1.23056	1.15817	1.13507	1.25226	1.29147	1.21363	1.15516	1.12883	1.04273	1.16636	1.10783	1.14971	1.14032	1.24064	1.24684	1.41493	1.21323	1.33748
794		4	934001..935000	1.02176	1.10974	1.07342	1.02064	0.96407	1.02542	0.990078	0.704096	0.980923	1.05991	1.16036	1.10589	0.922398	0.93091	1.19808	1.21033	1.06211	1.10143	1.28399	1.16958	0.956344	1.06039	1.13009	1.09139	1.14142	1.22405	1.25836	1.16713	1.21726	1.17702	1.02687	1.17715	1.26276	1.28169	1.13095	1.18108	1.11689	1.21418	1.27098	1.12647	1.13352	1.08377	1.09801	1.37194	1.59611	1.21132
795	clade II unique CNV	4	935001..936000	0.88772	0.979728	0.85893	0.927321	0.852857	3.05999	2.6808	1.2684	1.10972	2.88298	2.09043	3.01659	2.77328	2.57781	1.18933	0.953152	0.800734	1.04298	1.45076	0.916588	0.881106	0.913586	0.96094	1.08391	0.911543	1.54181	1.60092	1.50787	1.47947	1.45596	1.20087	1.21915	1.34097	1.45089	1.25089	1.33055	1.39238	1.558	1.44212	1.56691	1.4055	1.54841	1.37803	1.63773	0.624329	1.41434
796	TWCC13847 unique CNV	5	1..1000	1.04423	0.849202	1.04814	0.986672	1.02943	1.0475	0.992957	1.0848	0.825605	1.02006	0.986114	0.922918	1.03761	1.92927	0.905926	0.936555	0.92428	0.921833	0.988594	0.867838	1.04274	0.998047	0.930772	0.958627	1.05665	0.967543	1.00225	1.01516	0.962186	1.02373	1.03542	0.966472	1.06531	1.03928	0.935647	0.989428	0.986531	1.00658	1.01465	0.875824	0.997303	0.996192	1.0436	1.03342	0.44837	1.0043
797	TWCC13847 unique CNV	5	1001..2000	1.03571	0.927749	0.905483	0.986374	1.08736	0.939771	1.00966	1.03243	0.945487	1.01112	1.01239	0.929595	0.978905	2.03898	0.963781	1.06263	0.999113	1.00397	1.00036	1.07505	1.14623	1.03742	1.04182	1.00123	0.873707	1.02682	1.09592	0.997294	1.02772	1.06361	1.1624	1.03335	1.03076	1.15514	1.21798	1.08656	1.05015	1.08232	1.09656	1.08451	1.18042	1.06174	1.11304	1.13043	0.402958	1.05449
798	TWCC13847 unique CNV	5	2001..3000	1.02316	1.14206	1.11626	1.17565	0.979623	1.06958	0.994727	1.08141	0.9478	0.950003	1.12226	1.15751	0.973708	2.01663	1.13903	1.12763	1.04788	0.957696	1.09533	1.07062	1.25069	1.02967	0.966823	1.18877	1.07843	1.05403	1.07273	1.1112	1.11667	1.18112	1.16354	1.13628	1.05765	1.12825	1.07798	1.20187	1.12258	1.13818	1.19827	1.02525	1.14743	1.13447	1.07403	1.16718	0.554143	1.11808
799	TWCC13847 unique CNV	5	3001..4000	1.05856	1.0454	0.986057	1.13351	1.03834	0.952428	1.03054	1.18774	0.960259	1.07295	0.938677	1.23055	1.06146	1.94086	0.975944	1.16797	0.933486	1.02457	0.932762	1.06088	1.04453	1.0379	1.05618	1.03478	0.923248	0.90842	0.905949	0.919355	0.963591	0.939116	1.01629	0.871882	0.879673	0.955212	0.920079	0.848465	0.933099	0.986905	0.943011	0.871864	0.940098	0.951903	0.841922	0.928988	0.563678	0.928941
800	TWCC13847 unique CNV	5	4001..5000	1.2147	1.19263	1.15022	1.24205	1.16206	0.975119	1.10804	1.17018	1.09109	0.948643	1.1487	1.0701	1.03095	1.87497	1.14152	1.20756	1.02773	1.03933	1.13801	1.14451	1.06864	1.02001	1.13839	1.03046	1.1648	1.09583	1.07493	0.974719	1.08905	1.11032	1.22586	1.15492	1.09184	1.11886	1.07727	0.991519	1.06098	1.08089	1.07513	1.11652	1.03191	1.04459	1.05552	1.21392	1.05949	1.11496
801	TWCC13847 unique CNV	5	5001..6000	0.955489	0.954901	1.02541	1.00057	0.992045	0.90549	0.952467	0.969035	0.884124	1.03534	1.08822	1.01474	1.04439	1.87133	0.981037	1.04683	0.991527	0.925263	0.974461	1.09739	0.886017	0.979149	0.975048	0.936404	0.983177	1.03734	0.924279	1.00872	1.05672	1.05206	1.21767	1.00446	0.971262	0.975843	0.972763	1.00435	1.00881	1.04778	1.06142	1.04161	0.980526	1.04308	1.03101	1.13679	0.644559	1.15328
802	TWCC13847 unique CNV	5	10001..11000	1.09102	0.984064	1.05679	1.01579	1.05971	1.00716	1.01993	0.823297	0.961089	0.942927	1.14871	1.00414	0.954251	1.8414	1.01702	1.10275	1.04467	1.1318	0.964859	1.10832	1.02823	1.01533	1.00649	1.06687	1.20682	1.09114	0.955447	0.994268	1.0412	0.993973	1.116	1.07857	0.940168	0.919705	1.14511	1.07013	0.872123	0.979041	0.939448	0.88795	0.959995	0.973039	0.943972	1.10062	0.442858	0.959252
803	TWCC13847 unique CNV	5	11001..12000	0.612212	0.59326	0.622132	0.671913	0.683048	0.991336	0.972028	0.87971	0.8603	0.998666	0.828756	0.917867	0.840438	1.73434	0.601598	0.601714	0.648842	0.701162	0.70582	0.648748	0.694488	0.726685	0.67469	0.689889	0.727182	0.616417	0.698536	0.731592	0.621842	0.648438	0.792174	0.693311	0.648106	0.623682	0.781619	0.675448	0.673144	0.672932	0.727934	0.67325	0.666815	0.705238	0.620179	0.738847	0.247616	0.754095
804	TWCC13847 unique CNV	5	12001..13000	0.851428	0.697365	0.812435	0.794617	0.822196	1.06405	1.11428	0.890822	0.665782	0.997629	0.833098	0.928106	1.03777	1.87393	0.817184	0.909548	0.765835	0.992148	0.863348	0.887694	0.83406	0.932907	0.808297	0.902962	0.879256	0.910874	0.775214	0.874222	0.808691	0.79957	0.882297	0.896579	0.729886	0.749358	0.862052	0.913584	0.897695	0.844253	0.914605	0.913663	0.784908	0.842853	0.828813	0.901161	0.392515	0.859995
805	TWCC13847 unique CNV	5	13001..14000	1.14185	1.11667	1.09566	1.18824	1.04208	1.05799	1.02505	0.830874	1.0941	1.01134	1.03737	1.04225	1.06667	1.91995	1.0195	1.14597	1.02049	1.26309	1.0466	1.26698	1.13905	1.18525	1.13346	1.22168	1.11535	1.07924	1.02535	1.05082	1.01207	1.10003	1.1354	1.09274	1.03983	1.1002	1.15333	1.10133	0.982775	1.0775	1.01204	1.00843	1.04814	1.02954	0.991862	1.17554	0.484034	1.08718
806	TWCC13847 unique CNV	5	14001..15000	0.949424	1.11621	0.980398	1.01965	0.945722	1.0726	1.06468	0.996168	0.905287	1.05532	0.969631	1.10159	0.928532	1.87345	0.930241	1.01964	0.942469	0.899463	0.900535	0.940354	0.772036	1.06347	1.02415	0.977922	0.977865	0.933043	0.932682	0.987142	0.940622	0.893661	1.08705	0.907753	0.900364	0.947548	0.893561	0.927669	0.933999	0.97834	1.01528	0.917613	0.973461	0.97838	1.00324	1.14957	0.729812	0.95776
807	TWCC13847 unique CNV	5	15001..16000	1.02395	1.10351	0.942367	0.960995	0.914897	1.04452	1.0988	1.02991	0.857963	0.983275	0.996947	0.978613	1.16477	1.93049	0.872326	0.915895	1.05631	1.11599	0.928008	0.982061	0.91388	0.995522	0.86711	0.85926	0.902596	0.946409	0.886329	0.900231	0.913526	0.883548	1.02509	0.919992	0.87431	0.862153	0.882259	0.971666	0.916038	0.941598	1.05082	0.900797	0.86988	0.934418	0.877496	0.955567	0.641175	0.923559
808	TWCC13847 unique CNV	5	16001..17000	0.913281	1.08224	0.996707	0.877345	0.988586	0.979247	0.897991	1.10142	0.927305	1.10486	0.951737	1.14366	0.984211	1.7008	0.938531	0.913789	1.00058	0.976099	0.933312	0.848341	0.840247	0.938364	0.865598	0.942649	0.81376	0.946236	0.858198	0.84965	0.876194	0.83059	1.06335	0.886225	0.871633	0.937258	0.919178	0.859972	0.942617	0.90193	0.892048	0.908602	0.920524	0.973653	0.969106	0.981801	0.981664	0.902928
809	TWCC13847 unique CNV	5	18001..19000	0.98761	1.049	1.0696	1.03594	1.08411	0.779922	0.875268	0.925612	0.922437	0.965616	1.02196	0.949481	0.898928	1.82391	1.05778	0.992957	1.05842	1.12864	1.07815	1.07484	0.830437	1.07806	1.02334	1.1069	1.01992	1.00416	0.888211	0.86699	0.995216	0.982617	1.14899	0.945801	0.94339	0.961725	1.01124	0.994988	0.977169	1.01634	0.994769	0.95775	0.976219	1.00092	0.914689	1.02592	0.82048	0.995348
810	TWCC13847 unique CNV	5	19001..20000	0.790851	0.859368	0.738089	0.80428	0.767113	0.885415	0.945816	1.03008	0.795955	1.01017	0.926459	0.919619	1.01292	1.64742	0.79056	0.826534	0.893007	0.775229	0.848666	0.829589	0.802258	0.816068	0.931435	0.793562	0.752655	0.854551	0.859576	0.888837	0.838449	0.86855	1.03121	0.901406	0.838332	0.884199	0.963748	0.871529	0.819395	0.861852	0.818608	0.856624	0.853657	0.813562	0.806915	0.959478	0.660883	0.827815
811	TWCC13847 unique CNV	5	21001..22000	0.782557	0.730931	0.849319	0.751073	0.813249	0.95283	0.907596	1.0157	0.755192	0.959166	0.854637	0.96814	0.83748	1.78878	0.806299	0.890995	0.707764	0.885146	0.822414	0.878843	0.766578	0.767621	0.803097	0.761542	0.770208	0.859286	0.806061	0.870805	0.826404	0.694685	0.956297	0.765964	0.813766	0.783143	0.703296	0.786448	0.862096	0.772691	0.879814	0.872263	0.849178	0.876307	0.769229	0.953257	0.571646	0.833384
812	TWCC13847 unique CNV	5	24001..25000	0.95081	0.984221	1.07783	1.05462	1.06124	0.94606	0.878197	1.06666	0.880102	0.940833	1.05285	0.980852	1.03905	1.86318	0.969087	0.886133	0.934631	0.882338	0.95136	1.02004	1.17134	0.822372	1.00801	0.993438	0.923933	0.951966	0.958183	0.92806	0.927516	0.939014	1.07313	0.923398	0.897009	0.868086	1.00698	0.907578	1.01622	0.91351	1.0751	0.984935	0.918762	1.03613	1.01359	1.11304	1.04309	1.00211
813	TWCC13847 unique CNV	5	25001..26000	1.10568	1.09243	1.01262	1.08668	1.00832	1.00453	1.04955	1.11631	0.847301	1.07491	1.07925	1.1046	1.10939	1.99612	0.98883	0.966891	0.934529	0.949283	0.935205	1.05191	0.956465	0.88891	1.1446	0.949646	0.931169	0.960515	0.985896	0.957308	0.999155	0.950823	1.17078	1.02299	1.02249	0.951197	1.03686	0.93871	0.955315	0.971579	1.02941	1.04974	0.976189	1.07173	1.0328	1.0107	0.896817	0.959342
814	TWCC13847 unique CNV	5	26001..27000	1.146	1.0853	0.983889	0.9616	1.01544	1.01316	1.07726	1.17813	0.900919	1.08343	1.04204	0.994206	1.13358	2.00803	1.07484	1.06683	0.933415	1.06384	0.968663	1.00553	1.01414	1.07136	1.18893	1.00081	1.07935	1.00608	1.05205	0.95564	1.08213	0.945255	1.27502	1.03718	1.07416	0.919654	0.884766	0.976999	1.00148	1.02984	0.961193	1.01201	0.973793	1.01056	1.00118	1.05237	0.678502	0.952798
815	TWCC13847 unique CNV	5	27001..28000	1.05124	1.07593	0.943936	1.05045	0.993036	1.09183	1.04182	1.16052	0.945583	1.07427	1.11892	1.0397	1.13313	2.04555	1.16566	1.06329	1.12726	1.06608	1.01963	0.981693	1.0113	0.991263	1.09008	1.05236	1.02044	0.943559	0.941871	1.00486	1.06304	0.981695	1.22467	1.08509	1.01797	1.06553	1.04467	1.06511	1.10919	1.10255	1.15312	1.06995	1.02966	1.11387	0.994327	1.06911	1.03754	1.07268
816	TWCC13847 unique CNV	5	28001..29000	1.05096	0.942892	1.04222	0.952542	0.957714	0.935808	0.97958	1.19153	0.869303	0.958769	1.22126	1.2148	1.0551	1.76265	0.873641	0.904066	0.936808	0.988646	1.05905	0.991763	0.92673	0.879737	0.929455	0.853269	0.946333	1.04711	1.02448	0.976201	1.02663	1.05332	1.25837	0.98586	0.965775	1.06899	0.925246	1.03598	1.0371	1.10661	1.01567	1.0398	1.08201	1.0866	1.11818	1.11563	1.13194	1.05451
817	TWCC13847 unique CNV	5	29001..30000	0.969811	1.01657	0.874199	1.00397	0.994098	0.993033	1.12621	1.27681	0.761784	1.02717	1.02608	1.03479	0.995503	1.79541	0.941018	0.924086	0.966684	0.936305	1.05084	0.945725	0.915874	1.0114	0.931182	0.888116	0.936095	0.966377	1.00494	0.939862	0.978485	0.99849	1.21332	0.947822	1.04704	0.966269	1.06197	0.854798	0.963992	0.98445	1.01951	1.01806	0.967725	1.00791	1.00256	1.16412	1.37197	1.04901
818	TWCC13847 unique CNV	5	30001..31000	0.996683	1.07882	1.01052	1.05774	1.07381	1.04672	1.01727	1.16219	0.979424	1.02028	1.02826	1.00098	0.974537	1.91804	1.01757	0.878009	0.939036	0.974163	1.02896	0.869972	0.998382	1.02597	1.02286	1.09998	1.05727	1.04913	0.914003	0.904446	1.06455	0.996988	1.19297	1.02355	0.984326	0.972151	0.966189	0.886773	0.962671	0.953778	1.0238	0.891387	0.928323	1.08798	0.985827	1.0735	0.938573	1.00538
819	TWCC13847 unique CNV	5	31001..32000	0.950216	0.985322	0.969022	0.904201	0.90502	1.07182	1.11242	1.2413	0.855255	1.09005	1.03647	1.0862	1.18703	1.96334	0.921749	0.904075	1.01906	0.926745	1.01917	0.902892	1.02724	1.00224	0.918254	0.975602	0.972649	0.901707	0.88694	0.92751	0.914204	0.934442	1.16644	0.994739	0.842927	0.941436	1.18623	0.992401	1.01192	0.940897	1.01009	0.87685	0.959824	1.04329	0.962611	1.00885	0.887592	1.00191
820	TWCC13847 unique CNV	5	32001..33000	0.935053	0.955148	0.97623	0.801069	1.08906	0.899095	1.06078	1.0493	0.909035	1.05462	1.07442	1.10141	0.924962	1.84824	0.905749	0.944097	1.0542	1.01629	0.970303	0.971887	1.00369	1.01256	0.919035	1.00411	0.916364	0.930457	0.844312	1.02715	0.902877	0.962373	1.21538	1.01212	0.965271	1.019	1.00902	0.974025	1.01897	1.00353	1.05049	0.970787	1.02089	1.03112	0.937198	1.02892	0.80992	0.99491
821	TWCC13847 unique CNV	5	33001..34000	0.982956	1.10247	1.00453	1.04229	0.960869	1.10026	1.04678	1.05427	0.942569	1.02568	1.12345	1.18688	1.00032	1.92774	0.969585	1.05726	0.933841	1.04147	1.06639	1.07029	1.00929	1.07524	0.941524	1.04014	1.03318	0.949086	1.03083	0.978632	1.04135	1.11793	1.28612	0.985132	0.966891	0.977275	0.983889	1.03737	1.05146	1.04443	1.09862	1.04536	1.03163	1.0307	1.07296	1.09221	0.686857	1.04836
822	TWCC13847 unique CNV	5	34001..35000	0.918046	0.973841	0.991941	0.982827	0.904193	1.04323	0.998048	1.14658	0.980577	0.944274	0.960012	0.948245	0.993373	1.78356	0.822347	0.927885	0.969591	0.903585	0.984576	0.92589	0.901833	1.12021	0.956754	0.862812	0.846425	0.926197	0.960881	0.906319	0.955142	0.926662	1.1995	0.982965	0.902388	0.967539	0.946795	0.888062	0.990709	0.929097	1.01045	0.914755	0.96226	1.03061	0.963554	0.970049	0.829725	0.974618
823	TWCC13847 unique CNV	5	35001..36000	1.05761	1.17029	1.03467	1.04772	1.02937	0.965803	0.921382	1.02739	1.09474	1.07571	1.1399	1.03502	1.06653	2.08993	1.11843	0.907724	0.996966	1.06312	1.14148	1.00199	1.07095	1.03302	1.05276	0.863528	0.908391	1.08668	0.979016	1.01492	1.12767	1.07807	1.34091	1.08304	1.06945	1.09749	1.14401	1.0767	1.081	1.20701	1.13378	1.12149	1.11356	1.14604	1.07724	1.16955	0.749211	1.11084
824	TWCC13847 unique CNV	5	36001..37000	0.861553	0.827284	0.830441	0.790307	0.879364	1.10291	0.973872	1.01852	0.821987	1.08771	0.920919	1.0098	1.07964	1.7884	1.04166	0.787622	0.94968	0.978357	0.940686	0.844367	0.835227	0.848414	0.931026	0.935661	0.823797	0.894415	0.883747	0.89717	0.879072	0.937208	1.14957	0.942868	0.847794	0.863261	0.875311	0.8804	0.851814	0.970427	0.920633	0.854896	0.91999	0.903808	0.861751	0.914032	0.748553	0.961076
825	TWCC13847 unique CNV	5	38001..39000	1.19678	1.19186	1.14699	1.05516	0.946869	1.08006	1.05131	1.13265	1.01112	1.12127	1.068	1.05245	1.10848	1.85892	1.16822	1.021	1.08127	1.07033	1.0982	1.0236	0.988924	1.14988	0.950783	1.05145	0.972298	1.04082	1.04285	0.982395	1.05566	0.950961	1.28538	1.03119	0.942944	1.05649	0.964562	1.03309	0.983597	1.01098	1.09647	1.02534	1.05831	1.03334	1.01075	1.15579	0.930934	0.992729
826	TWCC13847 unique CNV	5	39001..40000	1.01739	0.991771	1.02818	0.828599	1.00601	1.01972	1.05513	1.1987	0.99186	1.15849	0.992954	1.00885	0.909184	1.9782	0.943837	1.01361	1.07883	0.968056	0.964374	0.954701	0.938315	1.02191	0.97777	0.906442	0.991607	0.949035	0.884485	0.939418	1.0342	0.994748	1.15247	0.962666	0.938507	0.943209	0.973379	0.957285	0.9704	0.979131	1.07552	1.07724	1.03186	0.977449	0.951796	1.1117	1.24417	0.97536
827	TWCC13847 unique CNV	5	40001..41000	1.13877	0.989243	1.15941	0.962422	0.927686	1.11125	0.946184	1.00677	0.945624	1.04958	1.00346	1.10082	1.11166	1.82043	1.09225	0.992929	0.946693	0.982791	0.905084	1.12012	1.04685	1.01495	0.98899	0.976662	1.02947	0.870259	0.893325	0.841806	0.983456	0.932949	1.25228	0.944134	0.91561	0.981418	1.00731	0.907588	1.03973	1.02192	0.953165	0.965992	1.02939	1.04444	0.996546	1.08623	0.969943	0.976692
828	TWCC13847 unique CNV	5	41001..42000	1.14774	0.886925	1.01483	0.877306	0.930247	1.093	1.02509	1.01674	0.875202	1.06308	0.940971	0.965931	1.206	1.82657	0.858102	0.928854	0.964163	0.869241	0.940705	0.980926	0.863454	0.94896	0.963818	0.901675	0.866129	0.880157	0.810379	0.909309	0.966077	0.91312	1.16854	0.87884	0.891126	0.867498	0.9871	0.831189	0.898536	0.991242	1.02093	0.900047	0.92942	0.949877	0.906715	0.987305	0.668793	0.980616
829	TWCC13847 unique CNV	5	42001..43000	0.992388	0.906169	0.978535	0.906669	0.889139	1.08516	1.00856	1.05737	0.915079	1.00909	1.00371	0.968062	1.0745	1.78227	0.971029	0.779563	0.876175	0.871177	0.974787	0.778548	0.847748	0.95409	0.932314	0.984792	0.778866	0.887347	0.872443	0.891402	0.834951	0.885309	1.12752	0.883766	0.878855	0.886577	1.05232	0.826947	0.924509	0.912649	0.89178	0.894046	0.909664	0.944056	0.91515	0.93913	0.843708	0.926822
830	TWCC13847 unique CNV	5	43001..44000	0.936514	0.960091	1.01932	0.981974	1.05423	0.858132	0.9224	0.980666	0.895092	0.912193	0.973046	0.952917	0.984201	1.90981	0.97052	1.00751	0.926103	1.07272	0.993012	0.994327	1.01419	1.02506	0.909151	0.96092	0.847347	0.915529	0.921397	0.940545	0.944483	0.967591	1.17711	0.978275	0.921138	0.963763	1.00104	1.00454	0.882649	0.961231	0.990992	0.947343	0.985257	0.970809	0.922578	1.03118	0.619958	0.954729
831	TWCC13847 unique CNV	5	44001..45000	1.07047	0.860582	0.860969	0.851342	1.07685	1.05377	1.14489	1.12158	0.88152	1.05525	0.985247	1.18308	0.961263	2.07097	0.970745	0.943015	0.962178	0.90784	0.929248	0.89214	0.879513	0.880033	0.923689	0.899862	0.886922	0.896342	0.947179	0.947059	0.916808	1.02464	1.17581	0.879168	0.833821	0.927071	0.977425	0.976335	0.870304	0.956062	0.878109	0.950913	1.0321	0.996294	1.02442	1.05334	0.739502	0.923282
832	TWCC13847 unique CNV	5	45001..46000	0.99594	0.994096	0.980918	0.923754	1.08915	0.98705	1.03088	1.02852	0.950572	1.10149	1.07626	1.01628	1.05076	1.92285	1.03629	1.09007	1.10266	1.05858	1.03483	0.990995	1.06158	1.00127	1.06583	1.08705	0.975994	0.99754	0.990661	0.940386	1.05695	1.0316	1.26759	0.995532	0.956016	0.938588	1.01524	0.989815	0.952106	1.03078	1.09306	1.04711	1.0384	0.947248	0.973705	1.08671	0.602842	0.988635
833	TWCC13847 unique CNV	5	46001..47000	0.902673	0.979009	1.00125	0.841927	0.932722	1.03644	0.968598	1.04427	0.895004	1.01692	1.00905	1.07826	1.12585	2.00089	0.884466	0.927133	1.07484	0.858103	0.848945	0.944642	1.00645	0.867368	1.03889	0.839303	0.792537	0.879417	0.84014	1.028	0.998998	0.907202	1.15809	0.953241	0.874195	0.891547	1.00029	0.891025	0.879	0.892334	0.992064	0.933508	0.942574	0.93891	0.91053	1.00327	0.83924	0.938961
834	TWCC13847 unique CNV	5	47001..48000	0.846663	0.759847	0.892705	0.77781	0.807284	0.882808	1.14278	0.986031	0.821229	0.933603	0.931803	1.00119	0.969369	1.80234	0.846674	0.821503	0.85757	0.838397	0.831764	0.848393	0.990845	0.72332	0.751582	0.86796	0.707451	0.793592	0.775417	0.80647	0.787352	0.757839	1.00254	0.815795	0.822789	0.801975	0.759652	0.81307	0.835927	0.782878	0.907104	0.898243	0.880428	0.964466	0.882898	0.861805	0.776171	0.84108
835	TWCC13847 unique CNV	5	48001..49000	0.856181	0.962798	0.857723	0.886373	1.026	0.893663	0.962515	1.09024	0.878418	1.14644	1.02158	1.05556	1.1512	1.89868	0.86779	0.893863	0.891386	0.935074	0.981164	1.07255	0.922925	0.917525	0.992931	0.862205	0.92684	0.937566	0.905745	0.929932	0.950534	0.898528	1.11481	0.933079	0.884044	0.860942	0.96067	0.891501	0.980114	0.915183	1.02008	0.898974	0.985065	0.956752	0.933414	0.972451	0.796479	0.925124
836	TWCC13847 unique CNV	5	49001..50000	0.96684	0.913886	0.908003	0.868734	0.842324	1.01105	1.07762	1.12964	0.82002	0.976321	0.890195	1.09126	1.04735	1.80149	0.825687	0.883387	0.910477	0.85061	0.873696	0.851126	0.845171	0.86386	0.923416	0.922656	0.840823	0.862075	0.834657	0.840803	0.837446	0.798141	1.04953	0.932268	0.847141	0.890243	0.904621	0.817382	0.866078	0.874744	0.948494	0.870279	0.940531	0.899797	0.924957	0.892984	0.735479	0.88017
837	TWCC13847 unique CNV	5	50001..51000	1.06097	1.03804	1.03821	0.98026	0.942372	1.20956	1.08121	1.08843	0.9473	1.06982	0.897129	1.19015	1.08398	1.93479	1.01384	0.990024	0.949113	0.996067	1.02076	0.966778	0.876766	1.00428	0.997166	0.851964	0.927779	0.906017	0.980094	0.946269	0.92507	0.884313	1.23145	0.986634	0.902752	1.0624	0.940374	0.933279	0.937354	0.954189	1.01894	0.969486	1.02539	0.979782	0.93395	1.00185	1.30243	1.01368
838	TWCC13847 unique CNV	5	51001..52000	1.02705	1.16153	1.05837	0.99459	1.13093	1.08673	0.906929	1.07492	0.953385	1.04963	1.11481	1.06107	1.01266	1.93445	1.17755	1.04473	1.01248	1.11409	1.00791	1.08266	1.0384	0.992477	1.12823	1.02315	1.08654	1.04326	1.00277	1.04378	1.05926	0.930644	1.32889	0.993428	0.998613	1.06932	0.966475	1.02646	1.04749	1.10365	1.04026	1.08121	1.07578	1.00108	1.07667	1.08007	1.04075	1.07627
839	TWCC13847 unique CNV	5	52001..53000	1.19327	1.02647	1.01965	1.1206	1.0823	1.07201	1.11475	1.12199	0.999838	1.15597	1.17771	0.956937	1.15738	2.03492	1.16218	1.01083	1.08056	1.05207	1.07188	1.01397	1.0163	1.04061	1.07439	1.08014	1.03802	0.95799	1.00011	1.04654	1.11017	1.03861	1.29916	1.03818	0.95386	1.10978	1.0712	1.05993	1.01727	1.0561	1.09221	1.07714	0.978654	1.07433	1.15751	1.06266	0.878405	1.05917
840	TWCC13847 unique CNV	5	53001..54000	1.03091	1.01523	1.06853	1.0163	0.980333	0.979221	1.06597	1.06693	1.0192	1.00077	1.15968	1.09259	1.02226	1.96933	1.08591	0.955672	1.03885	0.894121	1.00169	1.00866	1.10311	0.885674	1.14666	0.981801	1.05792	0.962117	1.074	0.942622	1.01486	1.08185	1.34924	1.0679	0.920386	1.08348	0.994598	1.00778	1.0992	1.12769	1.16619	1.12691	1.05124	1.04729	1.12513	1.08639	1.03524	1.0989
841	TWCC13847 unique CNV	5	54001..55000	0.850289	0.952362	0.911406	0.802248	0.901842	0.899603	1.06787	1.14089	0.840854	1.0323	0.984712	0.943232	1.07501	1.78129	0.884359	0.853484	0.893219	0.830654	0.889637	0.870424	0.955055	0.808365	0.810717	0.745464	0.807737	0.818448	0.844545	0.813347	0.856555	0.886166	1.15308	0.866792	0.824012	0.873892	1.00078	0.865245	0.894956	0.888458	0.910551	0.895261	0.954551	0.915072	0.847431	0.836483	1.14035	0.972661
842	TWCC13847 unique CNV	5	55001..56000	1.04364	0.953205	0.963354	0.884788	0.950562	0.979693	0.997981	1.04723	0.730925	1.0712	0.887137	0.946269	1.0821	1.77378	0.958357	0.857161	0.987709	0.828192	0.887792	0.830083	0.878456	0.915623	0.982863	0.966303	0.97192	0.761952	0.780221	0.83885	0.822798	0.753534	1.06345	0.868923	0.774673	0.881164	0.833621	0.780402	0.865266	0.877349	0.873545	0.854659	0.814366	0.843518	0.929298	0.810361	0.876258	0.797744
843	TWCC13847 unique CNV	5	56001..57000	0.944646	0.97037	0.917487	0.933555	0.919472	1.04744	0.947694	1.06483	0.764275	1.05846	1.05311	0.860712	0.961963	1.75744	0.89599	0.93774	0.917708	0.938312	1.00359	0.905846	0.894381	0.959803	0.916927	0.882434	0.915864	0.883595	0.915294	1.00318	1.03644	0.905368	1.19177	1.02434	0.881202	0.945025	0.94121	1.01482	1.12538	1.03004	1.09388	1.02281	1.06677	1.13081	1.10894	0.917859	0.922288	1.06647
844	TWCC13847 unique CNV	5	57001..58000	1.09933	0.992973	1.0686	1.06488	1.05226	0.963555	1.01283	0.958509	0.932769	0.866998	1.14313	1.08852	1.09563	1.87516	1.00193	1.08024	0.977683	1.05037	1.05225	0.975891	1.09728	1.04442	1.07609	0.975366	0.933943	1.12482	1.024	1.04262	1.03519	1.10188	1.37251	1.02297	1.08988	1.13385	1.05232	1.11213	1.17803	1.12364	1.21799	1.12065	1.20361	1.09592	1.19611	1.10954	0.741726	1.05332
845	TWCC13847 unique CNV	5	58001..59000	1.03345	1.01654	1.08273	1.04032	1.16545	1.13062	1.07557	1.01119	1.08039	0.973904	1.15387	1.09952	1.05972	1.88602	1.03553	1.22547	1.17716	1.16738	1.13664	1.11355	1.16737	1.06104	1.23062	1.08281	1.00754	1.05694	1.12818	1.10793	1.13547	1.11615	1.38963	1.15631	1.08896	1.19304	1.17083	1.13711	1.22111	1.08839	1.17093	1.12945	1.25615	1.14128	1.22426	1.08219	0.74453	1.0785
846	TWCC13847 unique CNV	5	60001..61000	1.01323	1.08979	1.0085	1.06634	1.08578	0.97015	0.974173	0.990702	0.970269	1.00245	1.09699	0.999462	1.01953	1.8542	0.898654	0.992374	0.932615	0.986699	0.972662	1.0294	1.01489	0.943646	0.946568	0.904249	1.05457	1.01918	0.968905	0.953555	0.999018	1.10923	1.20793	1.04957	0.972609	1.01059	1.18627	1.08859	1.06082	1.05663	0.960889	1.09402	1.10342	0.968773	1.11471	1.09923	1.02947	0.997868
847	TWCC13847 unique CNV	5	61001..62000	0.86013	0.977369	0.914584	0.890129	0.910556	1.1208	1.06792	1.16542	0.709101	1.00897	0.998842	1.0568	1.10611	1.87856	0.843961	0.905213	0.955281	0.801304	0.957392	0.901253	1.09233	0.817067	0.856095	0.923607	0.992854	0.953548	0.904969	0.963627	1.00638	0.924026	1.18634	0.940327	0.930591	1.00207	0.984549	0.910294	1.02195	0.984521	1.05963	1.05111	1.02794	0.950685	0.982547	0.969723	1.23487	0.922192
848	TWCC13847 unique CNV	5	63001..64000	0.912699	0.817264	0.749288	0.780833	0.925859	1.02234	0.908172	0.946202	0.915579	0.943439	1.01242	0.874173	0.912162	1.74014	0.836998	0.842238	0.830651	0.898303	0.855872	0.979402	0.915449	0.770385	0.869569	0.842747	0.887537	0.911513	0.961123	0.878756	0.945937	0.954169	1.09085	1.00866	0.869022	1.00133	0.944332	1.04994	0.97716	0.928806	0.982973	0.988487	0.981845	0.937866	1.003	0.901906	0.892465	0.949393
849	TWCC13847 unique CNV	5	64001..65000	0.919606	1.00841	1.01307	0.98465	1.02331	0.886517	1.07282	0.99427	0.892924	1.02362	1.04487	0.99554	0.912044	1.74959	1.04569	0.885071	1.029	1.06109	1.06287	0.957339	0.9495	0.905986	0.941319	0.882289	0.998017	0.962655	0.992844	0.886583	1.03918	0.997734	1.04717	1.03706	0.915841	1.01992	0.959196	0.980676	1.08664	0.940416	1.05602	0.998969	0.988407	1.02998	1.04295	0.927368	1.14774	1.04877
850	TWCC13847 unique CNV	5	66001..67000	1.06855	0.951284	0.92899	0.943613	0.842246	0.988143	1.02098	0.913923	0.835003	0.964236	1.00837	0.928466	1.18487	1.98809	0.857901	0.916008	0.938682	0.918905	0.941917	0.865421	0.924542	0.88398	0.920293	0.951222	0.883445	0.939178	0.965179	0.962668	1.00444	0.959884	1.19073	1.00309	0.947679	1.01512	0.976853	0.865255	1.04435	1.00948	1.02141	1.01929	0.916619	0.91764	1.03452	0.950566	1.02102	0.988188
851	TWCC13847 unique CNV	5	67001..68000	0.986075	1.06144	1.01256	1.04189	0.940631	0.889263	1.02358	1.00644	0.845431	1.13357	0.965569	1.02751	1.00872	1.91649	0.961034	0.917776	0.821729	0.931943	0.964356	0.914455	0.793687	1.01626	0.939846	0.969947	0.908514	0.858171	0.867669	0.983788	1.00755	0.906668	1.18898	1.03511	0.85257	1.05862	0.926874	0.957859	0.972992	0.947398	1.00124	0.945805	0.967574	0.958154	0.9711	0.953593	0.816013	0.945701
852	TWCC13847 unique CNV	5	68001..69000	0.915905	1.0394	0.84874	0.945159	0.995582	0.905105	0.940592	1.04901	0.735793	1.14816	0.917308	0.961122	0.894273	1.81128	0.820796	0.806222	0.70908	0.867615	0.872009	0.822641	0.85306	0.883605	0.883052	0.835288	0.827546	0.927658	0.894169	0.919931	0.98213	0.947412	0.991934	0.885078	0.878227	0.89546	0.969069	0.917123	0.893723	0.879202	0.897478	0.967274	0.844428	0.946838	0.945858	0.977806	0.888597	0.874368
853	TWCC13847 unique CNV	5	69001..70000	0.821436	0.914571	0.971219	0.928937	0.823578	1.02253	0.992382	0.930801	0.839427	1.0173	0.955059	0.984229	1.12635	1.83267	0.888978	0.837987	0.88219	0.871595	0.836304	0.820108	0.856635	0.905403	0.889521	0.93954	0.826466	0.915407	0.846389	0.886326	0.941349	0.958105	1.04159	0.949498	0.915469	0.906926	1.01472	0.915963	0.91369	0.967702	0.877475	0.931239	0.937401	0.965929	0.93873	0.956796	0.765437	0.956008
854	TWCC13847 unique CNV	5	70001..71000	1.02391	1.18312	1.09064	1.11606	1.17396	1.01741	1.10658	1.02581	0.990538	1.04156	1.02922	1.11384	1.00257	2.062	1.05655	1.04231	1.06817	1.05355	0.997217	0.974346	1.00985	1.08457	1.03124	0.983306	1.08007	1.04495	0.959056	1.00912	1.06356	1.10394	1.12244	1.10515	1.03958	1.02877	0.947323	0.9825	1.06623	0.993316	1.09691	1.02637	1.06715	1.0607	1.01851	0.936774	0.879314	1.06081
855	TWCC13847 unique CNV	5	72001..73000	1.05137	0.980323	1.00215	1.00178	1.04366	1.04198	0.974532	1.0718	1.02588	1.13604	0.992487	0.888676	0.932645	1.87646	0.863266	0.98283	0.989482	0.89093	0.946699	0.895356	1.02245	0.969552	0.999898	0.947733	0.932644	0.95728	1.03828	1.02691	1.04878	0.950187	1.06322	1.12504	0.971923	0.955715	0.845649	0.991757	0.993986	0.971959	1.09303	1.07593	1.00024	1.07914	0.987349	0.998388	1.15555	0.971838
856	TWCC13847 unique CNV	5	73001..74000	0.899578	0.956373	1.01761	0.944247	0.96421	1.04712	1.02992	1.05097	0.961339	1.08422	1.05172	1.06183	1.09036	1.95772	0.898844	0.88051	0.925425	0.896774	0.935223	0.84051	0.883817	0.950862	0.919523	0.890772	0.864276	0.980929	1.022	0.983451	0.940573	0.996545	1.11998	1.02679	0.976427	0.967582	0.909547	0.972638	1.08406	0.974233	0.974963	1.03213	1.05898	0.980191	0.945783	0.956703	0.785126	0.942814
857	TWCC13847 unique CNV	5	74001..75000	0.967125	1.17531	1.01481	0.899702	0.967599	0.901851	1.03272	1.10622	1.04646	1.21869	1.05929	0.981387	1.04214	1.87891	0.940781	0.788252	1.05071	0.887238	0.973053	0.933984	1.00202	1.01734	0.914937	0.951594	0.887888	1.03042	1.04384	0.97707	0.924755	1.02898	1.03258	0.984203	0.982987	1.00985	0.981932	1.00871	1.02152	0.968253	0.926813	1.02909	1.03056	1.07237	1.09026	1.01544	1.00659	1.05788
858	TWCC13847 unique CNV	5	75001..76000	1.06097	0.967629	0.926087	0.879456	1.0042	0.980839	0.991197	1.04845	1.00875	1.09432	0.886406	1.12243	0.943335	1.90064	1.02391	0.992139	0.955524	1.00813	0.973268	0.988115	0.992145	0.90446	1.03859	1.03417	0.929807	1.01592	1.00687	0.865383	0.946516	1.0078	1.06279	0.989312	1.00814	0.92991	0.88061	0.963648	0.925947	0.972901	0.986393	1.03385	0.940793	0.959167	1.1084	0.965606	1.03587	0.96635
859	TWCC13847 unique CNV	5	76001..77000	1.04632	1.20187	1.03642	1.13028	1.02922	1.07354	0.991222	0.953427	1.00722	0.978186	1.14787	1.04908	1.03982	2.0336	1.062	1.13676	1.04543	0.919431	1.07283	1.11875	1.14434	1.07026	1.07657	1.07303	1.03671	1.21938	1.07278	1.0073	1.04508	1.11004	1.08957	1.00135	1.15803	1.10471	0.993146	1.17053	1.19107	1.01618	1.14954	1.12871	1.11028	1.10601	1.14638	1.05842	0.854442	1.14397
860	TWCC13847 unique CNV	5	77001..78000	0.881135	1.00823	0.946721	0.866217	0.86834	1.02668	1.025	0.993006	0.906625	0.942631	1.0467	1.00987	1.0348	2.05529	1.05618	0.955268	1.11166	0.881752	1.00863	0.925481	0.900849	0.911228	1.01623	0.954204	0.937614	1.16238	0.98577	0.999025	0.947528	1.05745	0.924457	0.995222	1.0211	1.05931	0.991189	1.11414	1.14868	1.03867	1.17843	1.04779	1.11793	1.01291	1.15732	1.02164	1.26873	0.968853
861	TWCC13847 unique CNV	5	78001..79000	0.935474	0.813894	0.762606	0.87904	0.809642	1.02185	0.930028	1.03349	0.851693	1.10598	0.938822	1.02579	1.1532	1.85382	0.91231	0.631909	0.800978	0.90815	0.88892	0.754772	0.854604	0.794245	0.851119	0.780891	0.826949	0.920447	0.930412	0.808919	0.938735	0.874496	0.938522	0.940446	0.79738	0.816408	0.760488	0.823716	0.940259	0.877329	0.95838	0.835924	0.932228	0.980088	0.902813	0.907522	0.925383	0.877998
862	TWCC13847 unique CNV	5	79001..80000	0.840808	0.921671	0.834628	0.962254	0.954997	0.762821	0.739995	0.662704	0.78323	0.856872	0.875088	0.785443	0.841296	1.61131	0.936056	0.952005	0.945082	1.01176	0.863414	0.816293	0.900107	0.942623	0.933719	0.948757	0.94376	0.854713	0.865311	0.836135	0.923989	0.892564	0.913445	0.90085	0.88597	0.89766	0.874453	0.855116	0.944358	0.89583	0.945985	0.927659	0.900627	0.962093	0.910627	0.922404	0.927278	0.914996
863	TWCC13847 unique CNV	5	80001..81000	1.02844	1.10552	1.07383	0.947755	1.12894	1.04447	1.04826	1.07065	0.93447	0.994162	1.08254	0.873453	1.02244	1.88147	1.14127	1.07466	1.04126	1.01151	1.1456	0.91929	0.943628	1.01283	1.00041	1.01549	1.02359	1.12093	1.18585	0.999211	1.02403	1.08725	1.20731	1.08546	1.13664	1.10068	1.18499	1.07105	1.10531	1.09269	1.12854	1.0859	1.04698	1.12405	1.08651	1.08425	1.03787	1.05473
864	TWCC13847 unique CNV	5	81001..82000	1.0794	1.08382	1.11185	1.10044	1.13172	1.05366	1.20058	0.961255	0.982938	1.04941	1.15702	1.07283	0.936954	1.75291	1.23077	1.12773	1.166	1.10136	1.10699	1.04308	1.09825	1.1371	0.985155	1.05521	1.09696	1.07419	1.1117	0.959438	1.1489	1.03112	1.09384	1.08682	1.12111	1.10985	1.08224	1.09444	1.07672	1.01733	1.05072	1.10847	1.1714	1.20443	1.07902	1.19536	0.769944	1.14304
865	TWCC13847 unique CNV	5	82001..83000	0.895778	0.892081	0.874974	0.952046	0.978779	0.991275	0.968331	0.978501	0.917505	1.18467	1.0697	0.981991	1.01403	1.78419	0.970283	0.974075	0.9171	0.958042	0.968327	0.934541	0.912045	1.04939	0.954178	1.0311	0.9828	0.969977	1.03788	0.927643	1.00367	0.909829	1.04197	1.01111	1.02097	0.961018	0.940726	0.933219	0.903105	0.943952	1.04323	1.00097	0.945271	1.03734	0.931581	0.967506	0.706604	1.00525
866	TWCC13847 unique CNV	5	83001..84000	0.709713	0.803367	0.796665	0.831076	0.802857	0.823448	0.925413	0.787899	0.684746	0.80083	0.799035	0.855563	0.733223	1.63306	0.778159	0.784236	0.872286	0.880796	0.806837	0.779904	0.800446	0.805049	0.759787	0.869311	0.831963	0.80781	0.803189	0.836543	0.809987	0.814697	0.89142	0.859051	0.83135	0.759111	0.743051	0.759528	0.845554	0.835167	0.866759	0.874979	0.845837	0.843068	0.75566	0.892295	0.539811	0.819761
867	TWCC13847 unique CNV	5	86001..87000	0.892226	1.0687	0.903894	1.06495	0.93077	0.94857	0.920932	0.810003	1.03556	0.945587	1.04726	0.813329	0.938433	1.7532	0.835754	0.811695	0.85278	0.867926	0.872	0.875627	0.853048	0.79729	0.824093	0.819618	0.891216	0.916736	0.926472	0.863715	0.921209	0.958585	0.922159	0.89168	0.818848	0.883465	0.879291	1.01841	0.864415	0.863465	0.839549	0.842353	0.778739	0.766286	0.861343	0.914199	0.862546	0.800426
868	TWCC13847 unique CNV	5	87001..88000	1.01676	1.10565	0.985341	1.02246	0.991326	0.936088	1.06151	1.02171	0.94323	1.08186	1.0725	1.04839	1.16514	1.98673	1.10311	1.13975	1.00143	1.16909	1.01026	1.01982	0.928116	0.915911	1.05053	1.07175	1.01572	0.99032	1.04428	0.920925	0.929461	0.935714	1.09557	1.0323	0.971188	0.918912	0.972631	1.01706	0.974479	1.08282	1.01807	1.00244	0.976813	0.992498	0.904185	1.12366	0.926891	1.00723
869	TWCC13847 unique CNV	5	88001..89000	0.900927	1.04846	0.915427	0.918065	0.93718	0.978749	1.049	1.11088	0.883382	1.08523	1.02907	1.07975	0.991094	1.99549	0.941148	0.981288	1.00602	1.02126	1.00688	1.02063	1.05757	0.786119	1.05494	0.959597	0.95471	0.976497	0.983723	1.02824	1.01157	0.963507	1.09121	0.982773	0.958198	0.84003	1.07912	0.905814	1.00314	0.956293	1.05671	0.982732	1.04315	1.01814	0.966663	1.04029	0.605279	0.988116
870	TWCC13847 unique CNV	5	89001..90000	0.884886	0.875624	0.817505	0.782498	0.780636	1.0058	0.92442	0.950386	0.960042	0.911136	0.930818	1.18569	1.08357	2.03856	0.885627	0.939423	0.822326	0.823627	0.875878	0.793221	0.907523	0.990831	0.908761	0.896763	0.907478	0.83585	0.836976	0.914509	0.899448	0.896435	0.896939	0.869278	0.910255	0.850013	0.857874	0.833558	0.886611	0.855582	0.90297	0.904472	0.899006	0.861411	0.912942	0.968465	0.721844	0.89348
871	TWCC13847 unique CNV	5	90001..91000	1.0746	1.0816	1.10332	1.10106	1.00443	0.995255	0.960979	0.99052	1.14894	1.10953	1.16196	0.999618	0.96145	1.85203	1.14703	1.04798	1.01632	1.16214	1.04005	1.09488	1.07868	1.12469	1.03648	1.03022	1.01484	1.01852	1.11525	1.15894	1.08544	1.14597	1.17917	1.08891	1.06579	1.05594	1.11556	0.983828	0.978089	0.966009	0.997618	1.01665	1.09433	1.03644	1.05695	1.05488	1.01443	1.05561
872	TWCC13847 unique CNV	5	91001..92000	1.06484	0.98876	1.05423	1.14336	1.09625	1.06668	1.00125	0.968165	0.892554	1.19857	1.07631	0.92761	0.930317	1.95122	0.980729	1.03526	1.04067	1.02484	1.05651	0.998658	1.00265	0.994906	0.985682	1.00193	1.00409	1.08276	1.04329	1.09801	1.06626	1.06195	1.12519	1.05238	1.04923	1.07807	1.06076	1.07213	0.993223	0.996771	1.04534	1.02908	1.01933	0.986247	0.990082	1.09058	0.96271	0.993193
873	TWCC13847 unique CNV	5	92001..93000	1.10879	1.23215	1.06994	1.07066	0.964765	1.00633	1.07818	1.00152	1.03832	1.186	1.08936	0.924554	1.14628	1.84528	1.21462	1.07638	1.06949	1.00051	1.02917	1.14884	1.04974	1.06323	1.05453	1.04928	1.03892	0.962563	1.0862	1.06086	1.01856	0.88801	1.13978	1.02015	1.06599	0.978673	1.04917	0.979209	1.0276	1.01662	1.09251	1.0335	1.10856	1.08703	1.06475	1.04466	0.871694	1.17726
874	TWCC13847 unique CNV	5	93001..94000	1.06375	1.10202	1.1499	1.01725	1.0493	1.06467	1.10939	0.925402	1.0624	1.03894	1.1533	1.09696	1.07925	2.11104	1.03226	1.04478	0.931218	0.974079	1.05102	0.955616	1.05255	1.0679	1.02079	1.0527	0.942215	0.99178	1.1015	1.09901	1.00091	0.992416	1.12875	1.01161	0.988565	1.01974	1.00726	1.04597	1.05026	0.969866	1.12636	1.05363	1.10879	1.11218	1.06417	1.14455	0.681809	1.02045
875	TWCC13847 unique CNV	5	95001..96000	0.921945	1.01699	0.994952	0.886314	0.973712	1.05635	0.942887	0.80782	0.855836	0.930041	0.985842	1.0414	1.04831	1.73329	1.14247	1.01436	1.0201	1.01594	0.896946	0.947406	0.988778	0.999701	1.02758	0.947353	0.987418	0.996688	0.963035	0.956412	0.902808	0.982865	1.01295	0.950381	0.901042	0.862673	1.09042	0.969783	0.998535	0.994317	1.03529	0.977472	1.00278	0.912463	1.00195	0.977964	0.736736	0.910357
876	TWCC13847 unique CNV	5	96001..97000	0.870032	0.853819	0.923891	0.884372	0.907378	1.104	1.00978	0.9922	0.877692	0.99701	0.9286	1.03413	0.859659	1.99598	0.947485	1.02807	0.830216	0.911986	0.982693	0.814569	0.931824	0.920697	1.0437	0.881555	0.812601	0.9515	0.948945	0.958462	0.914489	0.926533	1.07081	0.939007	1.04532	0.885128	0.938923	0.90062	0.980085	0.929026	1.05343	0.97695	1.03246	1.05625	0.966738	1.05125	1.02613	0.963918
877	TWCC13847 unique CNV	5	97001..98000	1.12696	1.03985	1.03274	0.967992	0.971183	0.960974	1.10653	0.97584	0.867804	0.978845	0.949528	1.03565	1.04822	1.79497	0.991211	0.99213	0.911034	0.880593	0.946196	0.903229	1.02945	0.960283	0.983107	0.922647	0.975845	0.91269	0.991961	1.03329	0.931367	0.866458	1.03895	0.901451	0.902	0.916619	0.931051	0.835441	0.906157	0.898835	0.961318	0.912068	0.935187	0.929722	0.884913	1.00766	0.835585	0.982091
878	TWCC13847 unique CNV	5	98001..99000	0.845128	0.850381	0.944191	0.925488	0.882917	0.867115	0.995403	0.908991	0.799163	1.1547	1.04156	0.918821	1.01056	1.73825	0.839816	0.876156	0.873764	0.893069	0.914062	0.889659	1.02028	0.835637	0.97415	0.958047	0.925057	0.85953	0.909588	0.958977	0.928646	0.962705	1.03305	0.905987	0.901719	0.873679	0.873442	0.872302	0.883628	0.865348	1.02667	0.96038	0.852862	0.922305	0.987864	0.99023	1.20907	0.900631
879	TWCC13847 unique CNV	5	99001..100000	0.698103	0.730437	0.723221	0.740361	0.767785	0.868007	1.06326	0.893252	0.932439	1.00106	0.95443	0.88451	1.08572	1.89292	0.973611	0.953726	0.988368	0.910074	0.897338	0.872642	0.949937	0.879697	1.06006	0.966086	0.915319	0.85814	0.947111	0.933934	0.911561	0.895827	1.01981	0.871218	0.923451	0.86581	0.912493	0.910294	0.865471	0.939214	0.963809	0.9252	0.997585	1.06599	1.03634	0.98209	1.04539	0.91833
880	TWCC13847 unique CNV	5	100001..101000	0.69507	0.751164	0.790938	0.667433	0.742402	0.875058	1.0629	0.926379	0.787348	1.08281	0.793087	1.00752	0.947437	1.6959	0.796576	0.720697	0.790678	0.791613	0.863134	0.744282	0.819484	0.688561	0.873325	0.812259	0.685877	0.792365	0.839451	0.807747	0.805999	0.739541	0.966378	0.869597	0.839051	0.75946	0.746064	0.754909	0.759183	0.82475	0.899719	0.821881	0.858719	0.908698	0.981829	1.04665	1.03794	0.880492
881	TWCC13847 unique CNV	5	101001..102000	0.95825	0.847292	0.872032	0.990279	0.870448	1.03126	1.01859	0.929449	0.812904	1.03382	1.08414	1.15576	1.10575	1.81765	0.987089	0.902589	0.935178	0.945734	1.06382	0.874481	0.898393	0.950926	0.854553	0.863981	0.967152	0.977035	0.958843	0.971586	0.957146	0.879345	1.06489	0.978903	1.02378	0.906202	0.898069	0.956125	0.967181	1.01102	1.03003	1.02115	1.00292	0.995343	0.976459	0.980824	0.939637	0.930147
882	TWCC13847 unique CNV	5	102001..103000	0.990692	1.13493	0.950821	1.03498	1.00021	1.02752	0.97086	1.00275	0.845254	0.982629	1.06424	0.907121	1.05141	1.77952	1.05848	1.07345	1.15767	1.00628	1.05402	1.04068	1.00427	1.00693	1.03953	0.978466	1.02778	1.00805	1.11383	1.02295	1.01043	1.02587	1.05931	1.04547	1.06499	0.96031	0.944552	0.94438	0.94654	0.963405	1.02322	0.98692	0.940199	1.07029	0.928816	1.10743	1.14969	1.0299
883	TWCC13847 unique CNV	5	103001..104000	0.843754	1.06207	1.11978	1.09162	0.981762	1.05392	1.07661	0.962591	1.01317	0.970154	1.03147	0.974155	0.907586	2.04044	0.917095	0.978081	1.11792	1.06801	0.936062	0.867449	0.935228	1.0667	0.903132	0.921124	0.959355	0.922851	1.03002	1.05976	1.00648	1.06775	1.15852	1.03418	1.05757	0.958613	0.921443	0.911196	0.965058	0.952266	1.09458	0.967302	1.00047	1.06454	1.11495	1.17527	1.03266	0.960352
884	TWCC13847 unique CNV	5	104001..105000	1.00789	1.09094	1.10728	1.00845	0.97721	1.13934	1.06664	1.00953	0.922977	1.11146	0.9182	1.08589	1.00882	1.97401	0.889926	0.923945	0.971424	1.02894	0.984389	0.970972	0.94894	0.920306	1.05047	0.898702	0.942619	0.946378	0.911567	0.94894	0.860995	0.93246	0.990923	0.943724	0.910288	0.866211	0.94961	0.854977	0.926583	0.874093	0.923294	0.913397	0.961747	1.03884	1.03178	1.00238	0.982824	0.885998
885	TWCC13847 unique CNV	5	105001..106000	1.0762	1.07318	1.12024	1.08906	1.09557	1.01838	1.01074	0.981844	0.966215	0.994936	1.07272	1.17425	0.942901	1.93814	1.04537	1.04937	1.02459	0.994323	1.0718	1.11485	1.06988	1.07301	1.13399	0.963711	1.02837	1.07837	1.09892	1.01481	0.985126	1.08574	1.13487	1.07283	1.07653	1.04476	1.08422	1.07607	1.12248	1.09946	1.09045	1.13155	1.06502	1.03972	1.10632	1.0308	0.726021	1.04164
886	TWCC13847 unique CNV	5	106001..107000	0.882868	1.00591	0.973582	0.887206	0.860977	1.05889	1.05539	0.992156	0.868279	1.09645	0.912142	0.980005	1.02144	1.98402	0.986971	0.942103	1.02966	0.980257	0.937377	0.944653	0.892193	0.916039	0.900546	0.88905	0.858701	0.966052	0.938747	0.994792	0.92787	0.928847	1.01528	0.957475	0.900612	0.857413	0.939429	0.901224	0.956988	0.89006	0.950852	0.979295	0.889898	0.893966	0.925172	0.948862	0.947721	0.957098
887	TWCC13847 unique CNV	5	107001..108000	0.987474	0.964461	0.884173	0.87907	0.924087	0.989753	1.07292	1.01755	0.870931	1.05086	0.994747	1.16314	1.12203	2.02173	1.15112	0.974696	0.975901	1.03473	0.988239	0.93698	1.05879	1.00654	0.869696	1.04614	0.943892	1.04192	0.902087	0.98669	0.927663	0.981584	1.00891	1.02467	0.919799	0.926073	0.886305	0.86136	0.894379	0.918358	0.971328	0.942045	0.99355	0.966645	0.966781	0.954887	1.25991	1.0255
888	TWCC13847 unique CNV	5	108001..109000	0.941861	0.921435	0.910426	0.948251	0.880004	1.04197	0.943455	0.922877	0.912919	1.01014	1.01962	1.13837	1.12667	1.87732	1.03478	0.85923	0.876843	0.966347	0.988519	0.938157	1.00627	0.878986	0.915064	0.890264	0.845933	0.989823	0.928917	0.845453	0.958256	0.92267	1.04668	0.942896	0.992672	0.897796	0.994158	0.938542	0.83763	0.899426	0.919079	0.866566	0.906605	0.811148	0.960167	0.899829	0.846416	0.884559
889	TWCC13847 unique CNV	5	109001..110000	0.844917	0.855425	0.989881	0.780099	0.89925	0.978346	0.943071	0.841112	0.838121	0.90637	0.869489	0.784956	0.790331	1.64224	0.893242	0.901179	0.822053	0.973996	0.927672	1.02325	0.843043	0.906626	0.94046	0.942912	0.808457	0.860818	0.871608	0.939809	0.925355	0.895882	1.04026	0.86651	0.911445	0.78437	0.796483	0.887318	0.905766	0.942259	0.965113	0.870146	1.00046	0.930776	0.961668	0.981671	1.0188	0.853898
890	TWCC13847 unique CNV	5	110001..111000	0.965355	0.981952	1.04782	0.96922	0.950422	1.02948	1.03752	0.991261	0.889233	1.10541	0.953827	1.0171	0.988964	1.86284	0.840823	0.958635	0.898627	0.993415	1.0299	0.761636	0.916604	0.90275	0.901463	0.944371	0.860009	0.867917	0.935807	0.945479	0.947292	0.881474	1.09074	0.955809	0.959429	0.877958	0.918122	0.885554	0.914228	0.871168	0.988849	0.931647	1.02623	0.968108	0.927037	1.03918	0.88705	0.947569
891	TWCC13847 unique CNV	5	111001..112000	1.10141	1.11404	1.16697	1.07191	1.18557	1.18419	1.07598	1.01935	1.08335	1.00348	1.10581	1.2013	1.03614	1.93438	1.14227	1.00407	0.973521	1.09774	1.09593	1.01296	1.05862	1.00142	1.08051	1.07038	1.08949	1.03551	1.07995	1.05069	1.16263	1.01748	1.23966	1.10121	0.99492	1.06586	1.01006	1.03496	1.11454	1.05144	1.09776	1.03957	1.02523	1.14029	1.07495	1.12878	0.885348	1.08589
892	TWCC13847 unique CNV	5	112001..113000	1.10155	1.11898	1.14814	1.16731	0.998041	0.977183	1.13758	1.10227	1.05685	1.12513	1.07841	1.06324	1.0363	1.78505	1.13786	1.21207	1.03938	1.12066	1.07762	0.976122	1.08018	1.02288	1.13959	1.00861	1.11814	1.01443	1.02454	1.00864	1.15495	1.04185	1.07105	1.01212	1.05817	1.13556	0.9369	1.00886	1.03207	1.0518	1.0977	1.13788	1.02824	1.11822	1.09704	1.11432	1.1447	1.08669
893	TWCC13847 unique CNV	5	113001..114000	1.10698	1.09275	1.07015	1.07044	0.999072	1.08376	1.07851	1.08174	1.05122	1.06642	1.04479	1.00124	0.905545	2.031	0.896297	1.02769	1.06949	1.00333	1.15043	0.994065	0.9778	1.00577	1.09013	0.966883	0.94614	1.01443	1.06177	1.04213	1.0318	1.04071	1.14904	1.07707	1.1084	1.07847	0.993586	1.04564	1.06838	1.03754	1.16434	1.05588	1.10911	1.16069	1.03482	1.08274	1.25024	1.19053
894	TWCC13847 unique CNV	5	114001..115000	1.00621	0.988344	1.10763	1.06222	1.02517	1.0558	0.985914	1.10097	0.91869	1.00291	1.00785	1.09251	0.931136	2.09813	1.02089	1.13489	0.975597	0.898363	1.13148	0.949929	0.987149	0.979484	0.978501	0.984964	0.980736	1.05125	1.03339	1.09949	1.13182	0.979538	1.19929	1.12906	1.00115	1.0467	0.978216	1.03283	1.04034	1.05252	1.13175	1.06894	1.09193	1.13479	1.10566	1.06723	1.23885	1.09992
895	TWCC13847 unique CNV	5	115001..116000	1.17136	0.998219	1.02085	1.03319	1.00565	1.03606	0.980473	1.00476	1.05668	0.967393	1.00586	1.10064	0.925426	1.87085	0.951026	0.950707	0.887538	0.984213	1.04316	1.00406	0.942193	0.990671	0.960461	0.943954	0.980007	1.00132	1.09234	1.03264	1.07471	0.929169	1.124	1.02181	1.04897	1.04452	0.93457	0.991559	1.02617	1.0238	1.05548	1.10239	1.05855	1.08119	1.01359	1.07859	0.769112	1.04689
896	TWCC13847 unique CNV	5	116001..117000	1.03109	1.27828	1.07418	1.02694	1.22453	1.12609	1.05782	1.02249	1.07897	1.00439	1.04562	1.08994	1.06358	1.91298	1.13171	1.06891	1.16671	1.08176	1.01076	0.944159	1.08055	1.05611	1.05192	1.22826	1.16649	1.04207	1.02376	1.05249	1.02321	0.964033	1.14117	1.07826	1.02035	1.00614	0.996555	1.04204	1.00269	0.95474	1.07186	0.955623	0.986656	1.08125	1.05745	1.09352	0.627578	1.05922
897	TWCC13847 unique CNV	5	117001..118000	0.953756	0.990198	1.00333	0.862431	0.892614	0.986516	1.08107	1.05191	0.845874	0.993314	1.00719	0.974447	0.96365	1.75492	0.962478	0.920729	0.897513	0.908879	1.00296	0.839953	0.801443	0.948209	0.805468	0.838242	0.887958	1.01117	0.977862	1.00558	0.951861	0.978948	1.11889	1.02331	0.907603	0.890575	1.01412	0.86586	0.919745	1.05438	0.988831	0.926738	0.917967	1.00373	0.955698	1.03141	1.15437	0.971642
898	TWCC13847 unique CNV	5	118001..119000	1.02155	1.02227	1.13042	1.02117	1.00554	0.896471	0.978379	0.900329	1.00131	1.09008	1.03438	0.996309	0.968935	1.71332	0.977863	0.990748	0.982423	0.978561	0.963321	0.996177	1.06804	1.10741	1.04092	0.969856	0.997674	1.04669	0.967518	0.866209	1.00618	0.984009	1.11311	1.0232	0.924088	0.90066	0.922146	0.930484	0.951813	1.00954	0.99552	1.03719	1.00823	0.968405	0.954465	1.04771	0.920238	0.975101
899	TWCC13847 unique CNV	5	119001..120000	1.03899	0.989704	1.10019	1.08655	1.15792	1.05841	0.897933	0.986257	0.91956	1.09943	1.03689	1.10081	1.05963	1.76472	0.926072	1.1473	0.908147	1.01741	1.09869	1.03559	1.03195	1.02788	1.00877	1.04563	1.01661	1.0179	0.997181	0.881268	1.0304	1.02881	1.19482	0.990177	0.992077	1.03995	1.1017	1.04322	1.02511	1.00998	1.01893	1.01328	0.981452	0.94736	0.959063	1.05319	0.805781	1.01414
900	TWCC13847 unique CNV	5	120001..121000	1.07421	1.15936	1.10386	1.04578	0.963219	1.05337	1.00207	1.00809	1.00387	1.19221	1.00877	1.08712	1.07793	2.03102	1.07406	0.932248	0.909221	0.867281	0.969641	0.949298	1.05867	1.02805	0.943895	0.956905	1.02906	0.952645	0.998773	0.993682	1.02446	0.938277	1.0888	0.982518	1.03097	1.00831	0.998138	0.926747	1.01382	0.944903	1.0292	0.988344	1.08952	0.989982	0.965762	0.987966	0.757372	1.01291
901	TWCC13847 unique CNV	5	121001..122000	0.932256	0.896788	0.952517	0.862877	0.892403	1.11554	1.12713	1.10497	0.985428	1.02191	0.963751	1.08081	1.05443	1.88787	1.04091	0.943109	0.879942	0.96961	1.0389	0.893349	0.919497	1.05684	0.983975	0.939513	0.931616	0.912862	0.954108	0.956004	1.03196	0.975196	1.06799	1.03185	0.966031	0.972109	0.891033	0.979804	0.961214	1.0241	1.05509	0.955557	1.01342	1.01482	1.00299	1.0309	1.09349	1.00377
902	TWCC13847 unique CNV	5	122001..123000	1.03856	0.867895	1.02853	0.970102	1.058	1.0961	1.03493	1.04255	0.997928	1.1002	0.930478	0.999034	1.12008	1.87228	1.06619	0.889359	0.944384	0.849129	1.02219	1.03504	0.963091	1.03778	0.948773	0.947307	0.989675	0.921948	0.956194	0.914607	1.02573	0.949827	1.10626	1.0283	0.998456	0.95811	0.978744	0.95111	1.00524	0.888768	1.02254	1.03616	1.03162	1.01527	1.07451	1.07474	0.865118	0.970256
903	TWCC13847 unique CNV	5	123001..124000	0.95268	0.994411	0.953625	0.998048	0.988039	1.02092	1.0469	1.02944	1.03773	1.10244	0.949052	1.09882	0.939844	1.77901	1.03636	1.00278	1.04405	0.888839	0.976782	0.981283	0.973655	0.991822	1.00728	1.02255	0.973097	1.0027	0.922377	1.03436	0.939639	0.947246	1.06458	0.988875	0.973559	0.985962	1.15285	0.968078	0.990219	0.982637	1.01897	1.01948	1.02243	1.01202	1.06411	1.01872	0.824851	1.00775
904	TWCC13847 unique CNV	5	124001..125000	1.09944	0.968876	0.960696	1.20003	1.06353	1.08131	1.10862	1.02785	1.08876	0.973675	1.04965	1.16929	1.09479	2.07679	1.01704	1.18155	1.07772	1.13102	1.07473	1.09605	1.00529	1.05827	1.00121	1.07626	1.11326	1.01781	0.919417	1.03687	0.991217	0.963516	1.13247	1.01648	1.05858	1.01378	0.955129	0.958107	1.03946	1.09496	1.07759	1.1463	1.05969	1.04744	0.991315	1.08958	0.764509	1.0737
905	TWCC13847 unique CNV	5	125001..126000	1.03944	1.2547	1.18645	1.22289	1.12308	1.07221	1.07139	0.96133	1.07293	1.09087	1.15082	1.11233	1.04388	1.82824	1.09367	1.24121	1.15162	1.09351	1.17932	1.16271	1.13794	1.20419	1.23928	1.09228	1.12872	1.04685	1.10125	1.19687	1.09309	1.03685	1.24796	1.08484	1.07986	1.07515	1.14423	1.05562	1.116	1.09444	1.17961	1.09759	1.05338	1.22448	1.04749	1.21036	0.808605	1.09064
906	TWCC13847 unique CNV	5	126001..127000	0.854201	0.952643	0.873846	0.8218	0.874297	0.989578	0.946417	0.931532	0.907383	0.941567	0.982588	0.895616	1.0344	1.74085	0.890163	0.887657	1.03141	0.910194	0.949981	0.983039	1.03971	0.908128	0.856505	0.934601	0.82817	0.889466	0.91081	0.918352	0.951173	1.011	1.14795	1.01237	1.02833	0.910157	0.881622	0.962647	0.902674	1.01486	1.05289	1.01196	1.02827	0.997419	1.03182	1.05297	0.853224	0.960683
907	TWCC13847 unique CNV	5	127001..128000	0.964525	1.02114	0.99655	1.11775	1.01627	0.986228	0.974248	0.795096	1.03407	0.869172	1.06411	0.937995	0.971095	1.76034	1.15099	1.13889	1.05853	0.957014	1.04439	1.08096	1.07525	1.04907	1.00115	1.20395	1.0514	1.08374	1.08237	1.09759	1.03103	1.07942	1.16599	1.15126	1.052	0.970813	1.13541	1.18483	1.10746	1.10359	1.09735	1.09451	1.03215	1.13426	1.14506	1.03402	0.97971	1.18585
908	TWCC13847 unique CNV	5	128001..129000	0.882187	1.02646	0.807816	0.989496	0.795861	1.01808	0.966053	1.00567	0.871906	1.12386	1.03485	1.05637	1.18353	1.85764	0.947852	1.03718	1.01472	0.946929	0.993432	0.957413	0.984633	1.00757	0.927562	0.908001	0.964132	0.929747	0.971428	0.97235	0.957706	1.01684	1.01276	0.93541	0.9059	0.917608	0.980701	0.950465	0.983411	0.994558	1.01717	0.959288	0.974045	1.08557	0.923189	1.0176	0.979497	0.970131
909	TWCC13847 unique CNV	5	129001..130000	1.00012	0.936624	0.92849	0.853859	1.01375	1.073	1.10852	0.939259	1.04397	1.08599	1.08196	1.06239	1.19296	1.79474	1.05243	0.877548	1.09566	0.849344	0.984557	0.955962	1.00207	0.954162	0.985399	0.920317	0.959829	0.867734	0.960289	1.00997	1.0746	0.922357	1.17131	0.954133	1.0258	0.895682	0.934306	0.91853	1.01343	0.906348	1.10385	1.05051	0.997394	1.00028	0.922792	1.09415	0.830092	0.942009
910	TWCC13847 unique CNV	5	130001..131000	0.965862	0.809748	0.851878	0.847536	0.890826	1.07494	0.988326	1.03442	0.87625	1.08925	0.848137	1.07861	0.929627	1.8513	0.822276	0.808272	0.831735	0.908353	0.82728	0.903355	0.924457	0.897381	0.859676	0.801011	0.864821	0.829309	0.781569	0.824235	0.868816	0.745284	0.869785	0.732115	0.767005	0.761694	0.784741	0.665516	0.781105	0.773162	0.909113	0.84712	0.86988	0.848633	0.802242	0.878158	0.69498	0.852245
911	TWCC13847 unique CNV	5	131001..132000	0.84972	0.882532	0.829009	0.629637	0.817535	0.791591	0.887468	0.843812	0.795528	1.01332	0.870585	1.01036	0.94438	1.78166	0.836097	0.828678	0.855312	0.746692	0.846941	0.820676	0.840746	0.86378	0.808824	0.843	0.793942	0.911696	0.805886	0.860183	0.748703	0.888388	1.05734	0.899657	0.843852	0.85026	0.916099	0.787875	0.911264	0.807911	0.905613	0.897644	0.95288	0.910202	0.933768	0.874945	0.564973	0.874458
912	TWCC13847 unique CNV	5	134001..135000	0.915484	0.909213	0.919389	0.969934	0.943614	1.12098	1.13908	0.968098	0.93945	1.00237	0.941541	1.09074	0.98569	1.69003	0.796173	0.897662	0.803266	0.95325	0.913605	0.861437	0.880912	0.922495	0.92843	0.982998	0.95867	1.03123	0.950343	0.903639	0.927329	0.95663	1.10627	0.939462	0.899472	0.835487	1.0203	0.930612	0.978255	0.992945	1.03595	0.976029	0.903696	1.00503	0.919823	1.00935	0.709253	0.956347
913	TWCC13847 unique CNV	5	135001..136000	1.15538	1.21122	0.918997	1.12609	1.11153	0.953889	1.04871	0.871516	0.999266	1.00124	0.927351	1.11272	0.935287	1.94573	1.00495	1.05266	1.1265	0.964973	0.947333	0.975649	1.02949	1.03453	1.16437	0.963739	1.04278	0.988525	0.956825	0.947174	0.892836	0.974634	1.02373	0.971272	0.955843	0.866492	0.834435	1.03325	0.951607	1.06698	1.01451	1.00983	0.908557	1.01938	1.06086	1.04555	0.88235	0.997001
914	TWCC13847 unique CNV	5	136001..137000	1.16392	1.11491	1.07385	1.01947	1.04215	1.17468	1.10619	1.09503	1.09918	1.0236	1.07394	1.21048	1.13798	2.10002	0.995924	1.14443	1.1694	1.11486	1.05154	0.95406	1.14957	1.12833	1.06907	1.15213	1.12659	1.08967	1.03501	1.03677	1.12254	1.07397	1.10204	1.09676	1.06429	1.03459	1.10786	1.03552	1.09937	1.12648	1.15507	1.03072	1.13065	1.05771	1.03137	1.13378	0.906139	1.07337
915	TWCC13847 unique CNV	5	137001..138000	1.10862	1.11841	1.09631	1.14553	1.15436	1.18827	0.964526	1.05851	1.09532	1.07893	1.17491	1.02818	1.03659	1.76153	1.0582	1.133	1.11542	1.17312	1.08683	1.2282	1.05312	1.10367	1.27026	1.03602	1.07222	1.13039	1.05533	1.07166	1.08007	1.00434	1.23792	1.0915	1.02966	1.03361	1.14579	1.0797	1.07411	1.07746	1.05997	1.1055	1.1034	1.14842	1.14326	1.08205	1.14244	1.09101
916	TWCC13847 unique CNV	5	138001..139000	0.941317	0.92102	1.05697	1.05774	0.923259	1.07131	0.943138	1.02506	0.895108	0.960331	1.04888	0.993973	0.98925	1.89346	0.921962	0.971216	1.0656	1.01703	0.980959	1.10074	1.10293	1.01372	1.03322	0.961128	0.928525	1.08146	0.977542	0.974825	1.04053	0.989687	1.11831	0.990314	0.938903	0.938563	0.922498	0.98471	1.12454	0.975535	1.02912	1.00264	1.00228	1.11751	0.997403	1.04726	0.85713	1.0698
917	TWCC13847 unique CNV	5	139001..140000	0.821176	0.89416	0.94729	0.90433	0.892965	1.0557	0.986765	0.903715	0.839016	0.946024	0.998808	0.875409	1.17696	1.88027	0.89156	0.822142	0.956192	0.945148	0.807135	0.899214	0.862701	0.941737	0.902907	0.872202	0.886351	0.805904	0.79757	0.844326	0.802639	0.84957	0.95714	0.841694	0.832507	0.728907	0.886943	0.78059	0.991002	0.984491	1.04306	1.05749	0.996408	1.04586	1.02997	0.937174	0.662024	1.01331
918	TWCC13847 unique CNV	5	140001..141000	1.04709	0.829868	1.02274	1.0152	0.952694	0.97853	1.01206	0.962277	0.96736	1.12744	0.945475	1.0218	1.07588	1.98866	1.14812	0.933593	1.06621	1.01797	0.957345	0.879232	1.08326	1.06889	0.99939	1.0248	0.988279	0.934452	0.940523	0.993177	0.974565	0.973168	1.07206	1.02335	0.993184	0.879066	0.904424	0.915319	0.966076	0.891393	0.905336	0.968385	1.04609	1.02594	0.999536	1.03528	0.679121	1.0368
919	TWCC13847 unique CNV	5	141001..142000	0.987783	1.07984	1.11663	1.13607	1.06138	1.02086	1.13598	0.933015	1.21525	1.1769	1.10052	0.939056	1.10692	2.0078	1.17038	1.09388	1.15802	1.19713	1.14561	0.975481	1.14513	1.13147	1.17209	1.14663	1.14409	1.11754	1.08477	1.02136	1.04263	1.11245	1.19202	1.087	1.03981	1.07432	0.973775	1.01269	1.04893	0.996451	1.06098	1.00248	1.10455	1.09058	1.01517	0.979268	0.947934	1.1195
920	TWCC13847 unique CNV	5	142001..143000	1.00894	1.05185	1.07628	1.02719	1.06954	1.02359	1.09742	1.01736	1.07313	0.986103	1.09707	0.970427	1.0697	1.79347	1.02764	1.04361	0.947837	1.03301	0.991334	1.02957	1.06972	0.962105	0.916137	1.06863	1.14346	1.0493	1.04435	0.924741	0.978416	1.00184	1.11052	1.08307	1.00452	1.06295	0.941694	1.01442	1.04599	1.04587	1.07717	1.01841	0.984995	1.07675	1.04023	0.988814	0.912792	1.04667
921	TWCC13847 unique CNV	5	143001..144000	0.876283	0.90263	0.898922	0.86255	0.876874	1.02938	1.11247	0.90385	1.12024	1.0712	1.14718	0.94037	1.10965	1.82174	0.808952	0.954967	0.904562	0.86807	0.807853	0.943297	0.8915	0.89933	0.862105	0.871767	0.855109	0.872784	0.865796	0.903151	0.869287	0.829382	0.932612	0.897909	0.873699	0.951111	0.75653	0.929086	0.843137	0.909884	0.858472	0.881075	0.884564	0.873678	0.862254	0.799651	0.939076	0.920842
922	TWCC13847 unique CNV	5	144001..145000	0.98563	1.02426	0.951988	0.984947	0.910782	1.12775	1.04503	1.03136	1.14062	1.04194	1.16337	1.01537	1.15316	2.08128	1.00432	1.03142	0.998171	0.949307	0.875346	1.03216	0.947433	0.979348	0.918684	0.95782	0.961216	0.933824	0.901058	0.940483	0.992091	0.972882	1.06221	0.954798	0.932111	0.816476	0.901983	0.992045	0.966448	1.07177	0.954469	0.908915	0.909896	0.884461	0.9053	0.940266	0.980929	0.945764
923	TWCC13847 unique CNV	5	146001..147000	1.03012	1.02682	1.01938	1.05884	1.08678	0.951623	0.991656	0.90591	0.952345	0.944355	1.06053	0.990936	1.00619	1.73548	1.06333	0.907479	1.13153	1.01988	0.987755	1.0433	1.139	0.921792	1.07032	1.05499	1.08892	1.03444	0.978706	1.00962	0.988977	0.977049	1.04505	1.06071	0.942391	0.896568	0.972258	0.999984	0.981806	0.964056	0.98909	1.02978	0.936053	0.966635	0.962311	0.912812	0.974256	0.981448
924	TWCC13847 unique CNV	5	147001..148000	0.96653	1.13908	0.976358	0.92742	1.0163	0.996366	0.938122	0.935921	0.880247	0.939157	1.0101	0.878991	0.94363	1.78566	1.08559	0.936169	1.06115	0.886951	0.908459	0.961912	0.853279	0.865977	1.05588	1.01346	0.979858	0.951256	0.930285	0.889476	0.964996	0.884203	1.12522	0.945992	0.942027	0.846586	0.990134	0.959564	0.967279	0.973622	1.05307	0.949147	1.03054	0.950573	1.01108	1.06132	0.935246	0.9832
925	TWCC13847 unique CNV	5	148001..149000	0.86117	0.912988	0.868688	0.814269	0.926062	0.978338	1.04385	0.966322	0.838976	1.05129	0.958483	1.06904	0.849126	2.09453	0.733533	0.881761	0.908309	0.821715	0.957616	0.90798	0.940601	0.904125	0.914108	0.826352	0.905397	0.817718	0.834541	0.900746	0.871714	0.825796	1.01692	0.886271	0.921229	0.849502	0.837293	0.847721	0.856921	0.866801	0.890235	0.906864	0.831777	0.866138	0.805747	0.901627	0.919871	0.950671
926	TWCC13847 unique CNV	5	149001..150000	0.832787	0.931849	0.91934	0.9044	0.82674	0.876492	0.946109	0.803852	0.88169	0.913196	0.816767	0.983237	0.953295	1.73291	0.844731	0.810999	0.889351	0.95049	0.85438	0.978771	1.00352	0.871147	0.895785	0.923435	0.801898	0.728608	0.761144	0.794339	0.803376	0.786139	0.967984	0.801434	0.796141	0.791625	0.798374	0.829534	0.728984	0.793947	0.760474	0.800545	0.677463	0.82144	0.747224	0.813415	0.627385	0.851378
927	TWCC13847 unique CNV	5	150001..151000	0.886321	0.883791	0.831951	0.814596	0.764419	0.893611	0.942887	1.01538	0.85532	0.964613	0.855716	1.10578	1.06214	1.85506	0.859796	0.816792	0.791792	0.811844	0.94559	0.837577	0.875125	0.881016	0.786628	0.927912	0.861484	0.823813	0.805392	0.859305	0.875712	0.841098	1.03993	0.813309	0.82726	0.876611	0.768118	0.74021	0.817233	0.854851	0.884011	0.946185	0.837142	0.906887	0.892759	0.866974	0.678811	0.86585
928	TWCC13847 unique CNV	5	151001..152000	0.8986	0.939174	1.04403	0.9363	0.943723	1.04658	1.07747	0.870037	0.871624	1.02346	0.906449	0.936059	1.10014	2.16629	1.02466	0.85103	0.91793	0.987906	0.907639	0.826867	0.84962	0.852937	0.947739	0.955618	1.01236	0.872805	0.926336	0.957051	0.990205	1.03489	1.12093	0.93133	0.889523	0.866569	0.991651	0.957423	0.905854	0.945044	0.90939	0.973522	0.968832	0.953038	0.999268	0.986011	0.634116	0.993909
929	TWCC13847 unique CNV	5	152001..153000	0.975294	1.00115	1.07653	0.921732	0.893801	1.09553	1.05273	0.967458	0.831376	1.0907	0.838009	1.10572	0.906284	1.85576	0.915508	1.02625	0.871931	0.887489	0.87984	0.922516	1.02593	0.927361	0.950276	0.925393	1.03334	0.95516	0.93602	0.906887	1.03964	0.927934	1.12175	1.05156	0.949588	0.900541	0.924345	0.923377	0.813251	0.934786	0.919374	0.975763	1.01675	1.07185	0.976374	0.891215	0.788646	0.948401
930	TWCC13847 unique CNV	5	153001..154000	1.02171	0.967966	1.09154	0.925646	0.942544	1.06177	1.02257	0.918179	1.0345	1.08485	1.08875	1.08758	1.00605	2.03592	0.872161	0.917231	0.843837	0.885863	0.961475	0.919689	0.938911	1.01869	1.02126	0.84088	1.03526	1.01166	0.884145	0.976432	0.958502	0.948832	1.13688	0.977446	0.951918	0.95661	0.993212	1.08484	1.05438	1.01856	1.0176	0.91673	0.918551	1.00321	0.942514	1.075	0.74571	0.960236
931	TWCC13847 unique CNV	5	154001..155000	1.00457	0.94779	0.918212	0.864572	0.890834	0.972389	1.1219	0.9956	0.854627	1.00297	0.902431	0.919229	0.964083	1.78913	0.915496	0.859004	0.851342	0.842771	0.921268	0.960766	0.879513	0.920617	0.945466	0.937392	0.958652	0.912497	0.934089	0.94618	0.810547	0.881935	1.14391	0.89718	0.927236	0.881138	0.950203	0.875325	0.827583	0.845485	0.927741	0.964482	0.914294	0.932393	0.834397	0.953369	0.693297	0.89087
932	TWCC13847 unique CNV	5	155001..156000	0.938618	0.952755	1.07127	0.951135	0.937641	1.11399	0.964418	0.938884	1.06048	1.01851	0.982223	1.08525	0.938276	1.85922	1.0234	1.06157	0.985289	1.02096	1.09842	1.02762	0.95249	0.922879	0.981224	1.01405	1.00059	0.919717	0.96026	0.999388	0.970576	0.97184	1.20607	0.99647	0.927343	0.852622	1.01302	0.989408	0.940132	0.993736	0.999574	1.03008	0.91678	1.03379	0.983223	1.00865	0.973463	0.997618
933	TWCC13847 unique CNV	5	156001..157000	0.878585	0.948284	0.811395	0.879298	0.836656	1.10526	1.15924	1.04133	0.930738	1.0904	1.00169	0.923191	1.17215	1.79211	0.827854	0.883764	0.95918	0.82426	0.908972	0.910839	0.846435	0.836971	0.831264	0.808615	0.835291	0.937799	0.87907	0.896904	0.905333	0.892177	1.15441	0.968576	0.869997	0.838197	0.889142	0.827185	0.912878	0.962413	0.970248	0.894919	0.921288	0.955125	0.870325	0.927572	0.969634	0.883584
934	TWCC13847 unique CNV	5	158001..159000	1.21003	1.04014	0.938376	0.891923	0.943215	0.94871	1.08272	0.952767	0.943117	1.04668	0.928685	1.02335	1.07077	1.8171	0.971266	0.938351	0.874392	1.01053	0.959695	0.832385	1.01665	1.00227	1.09061	0.920526	0.858613	0.909667	1.01592	0.944406	1.0335	0.91925	1.11652	0.964351	0.989284	0.988298	0.890175	0.931941	0.932737	0.967341	0.901925	1.02218	1.04514	1.01227	0.923532	1.018	0.843534	0.98791
935	TWCC13847 unique CNV	5	159001..160000	1.10107	1.21737	1.25313	1.10877	1.08149	0.869626	1.01158	1.00604	1.14239	1.00433	1.15142	0.909291	0.964409	1.97365	1.24831	1.18376	1.06866	1.15612	1.093	1.15463	1.18412	1.24978	1.07204	1.15859	1.13322	1.05568	1.07481	1.10063	1.17093	0.977261	1.26713	1.05078	1.05334	1.08348	1.08759	1.03605	1.07774	1.05786	1.08112	1.18892	1.10232	1.12535	1.06743	1.19843	0.799554	1.10841
936	TWCC13847 unique CNV	5	160001..161000	1.17578	1.17497	1.12539	1.21098	1.07764	0.968051	0.952926	0.97915	1.12044	0.991321	1.11183	1.027	1.08369	1.95947	1.33602	1.19063	1.11729	1.17644	1.11786	1.30485	1.17676	1.23778	1.286	1.09568	1.15935	1.03913	1.01972	1.17276	1.12386	1.02858	1.27675	1.09838	1.02711	1.07547	1.08891	1.1712	1.11574	1.13955	1.12553	1.08693	1.10916	1.04822	1.14536	1.07674	0.570795	1.14187
937	TWCC13847 unique CNV	5	161001..162000	1.14134	1.03279	1.10411	1.06866	1.15208	1.02848	0.966212	0.954931	1.10386	1.17163	1.0662	0.912932	1.07604	1.98175	1.26129	1.09947	0.926569	1.04939	1.01567	0.983175	1.18568	1.06156	1.21309	1.08897	1.15078	0.963466	0.987701	1.05543	1.02125	1.02379	1.30771	1.04834	1.02777	1.0869	1.01601	1.02324	1.02588	1.04214	1.09003	1.04334	1.05471	1.0351	0.967756	1.02237	0.813247	1.08592
938	TWCC13847 unique CNV	5	162001..163000	0.960725	1.01218	0.882545	0.898236	0.979092	0.869215	0.928075	1.03513	0.844456	0.90194	0.98043	0.991393	0.758488	1.61981	1.08939	1.01601	1.00261	1.00813	0.95301	0.911963	1.01725	0.956232	0.853997	0.984176	0.970384	0.969693	0.998472	0.971285	0.979428	0.927086	1.19035	0.997034	1.01831	1.00302	0.994444	0.884781	0.932218	0.959769	0.952182	1.06338	0.910268	1.00214	0.999633	0.933458	0.851657	0.993024
939	TWCC13847 unique CNV	5	163001..164000	0.857023	0.934231	0.951203	1.01488	0.910938	1.10473	0.992732	1.00015	0.879868	1.08352	0.946945	0.985563	1.14358	1.84352	0.905571	1.07825	0.891346	0.956979	0.939568	0.97586	0.948089	0.898611	1.00845	0.953824	0.99994	0.906879	0.928034	0.935425	0.978789	0.952519	1.17195	0.946848	1.0314	0.967215	1.07347	1.01281	0.87679	1.04042	0.914873	0.912001	0.979852	0.964763	1.00539	0.968009	0.898442	0.961237
940	TWCC13847 unique CNV	5	164001..165000	1.10838	1.19777	1.16449	1.09382	1.13477	1.1415	1.04934	1.00673	1.12193	1.0631	1.08478	1.16626	1.08988	1.91718	0.992312	1.30435	1.04923	1.15422	1.09628	1.10746	1.14699	1.1708	1.12708	1.08262	1.19016	1.03418	1.03853	1.20527	1.10289	1.01585	1.24221	1.08446	1.08801	1.07341	1.03547	1.15699	1.07381	1.0659	1.07775	0.960238	1.08713	1.08224	1.09155	1.14494	0.762865	1.12923
941	TWCC13847 unique CNV	5	165001..166000	1.01005	1.00819	0.960039	1.01632	0.984627	0.978215	1.14454	0.994463	0.981044	1.1436	1.05068	1.10762	1.02134	1.80521	0.886006	1.08647	0.949012	1.08529	0.976437	1.08661	1.13428	1.0928	1.12713	0.993284	1.00716	0.947504	0.993533	1.0016	1.00698	0.912162	1.24174	1.06375	1.02378	1.02955	1.04715	0.918847	0.920841	0.952296	1.07339	1.04084	0.993368	0.983107	1.05781	1.10767	0.72548	1.04786
942	TWCC13847 unique CNV	5	166001..167000	1.17527	1.06158	0.993814	1.17441	1.12919	1.08889	1.12397	1.04179	1.03235	1.04947	0.889159	1.06345	1.18987	1.9929	1.04533	0.996183	1.0676	1.0652	0.977127	1.08527	1.05757	0.894216	1.12024	1.04862	1.09965	0.915955	0.900709	0.956811	0.923773	0.881069	1.12257	0.955563	0.894687	0.911376	0.969531	0.883988	0.947117	0.875786	0.917927	0.864971	0.871682	0.879898	0.953543	1.00315	0.680301	0.884085
943	TWCC13847 unique CNV	5	167001..168000	0.988736	0.967371	0.888527	0.953067	0.89957	1.01254	0.981717	0.876744	0.977369	1.00016	0.949646	0.890058	0.934794	1.73486	1.00957	0.953275	1.1199	0.966694	0.945776	0.920814	1.07425	0.989856	1.00267	0.947661	1.02572	1.00375	0.98413	0.949561	0.954022	0.968623	1.1786	0.925529	0.961321	0.998366	1.03229	0.994354	1.01441	1.05895	1.02165	0.898508	1.0397	1.01112	0.941046	0.956712	0.695193	0.915273
944	TWCC13847 unique CNV	5	168001..169000	0.915731	0.929602	0.94476	1.03574	0.965663	1.05507	1.08416	1.08789	0.993592	1.06127	1.12953	1.1255	1.0061	2.08502	1.03559	0.968997	0.946723	0.952736	0.984138	0.98451	1.14503	0.953363	0.893121	0.917127	0.881241	0.986689	0.954515	0.951869	0.942125	0.986451	1.14219	1.00355	0.995779	0.912791	1.06973	0.953806	1.07314	1.02744	1.00964	0.958253	0.993922	0.982319	1.01365	1.00524	0.942306	0.998753
945	TWCC13847 unique CNV	5	169001..170000	0.823615	0.970539	0.952017	0.960113	0.97454	1.05926	1.03991	1.04995	0.995132	1.06622	1.05161	0.977192	1.00487	1.89369	0.937524	1.03296	1.00499	0.973876	1.03443	0.885539	1.02018	0.955928	1.085	0.973935	0.987726	0.941135	1.02403	0.963449	1.01089	1.08387	1.20681	0.983912	1.01318	0.988494	0.923795	1.03135	0.881162	1.05236	1.04267	1.03621	1.03318	1.01927	1.04435	1.02824	1.11571	1.04319
946	TWCC13847 unique CNV	5	170001..171000	0.78377	0.735582	0.859498	0.780843	0.828435	1.00692	0.872339	0.876335	0.928216	0.919848	0.921149	1.01122	0.900407	1.79602	0.830697	0.786503	0.826327	0.819851	0.747873	0.743441	0.821028	0.85133	0.845997	0.817488	0.783765	0.762753	0.734381	0.764966	0.756121	0.743911	0.86557	0.805614	0.7646	0.766681	0.743931	0.703676	0.723574	0.830109	0.834388	0.804314	0.706931	0.814718	0.908162	0.814067	0.955051	0.809177
947	TWCC13847 unique CNV	5	171001..172000	1.0246	0.965686	1.01642	0.915548	0.920003	0.832388	0.862525	0.776703	1.04425	0.850974	1.00471	0.89911	0.965504	1.83563	0.966387	0.945197	0.947159	0.876853	0.955444	0.894105	0.886418	0.847287	0.908049	0.98578	0.934611	0.823519	0.832416	0.801731	0.884652	0.910051	0.928734	0.911687	0.889184	0.987803	1.06516	0.906468	0.92808	0.99601	0.911864	0.86631	0.938689	0.916044	0.941667	0.873986	0.768454	0.931452
948	TWCC13847 unique CNV	5	173001..174000	0.933816	0.929906	1.05066	1.00235	1.07807	0.993523	1.04446	0.955401	0.974307	1.14016	1.07535	0.904551	1.05979	1.75959	0.917521	0.991453	1.05713	1.11239	1.06348	1.13285	0.893299	1.13813	1.04299	1.01775	1.06096	0.9889	0.98021	0.927093	0.992268	1.02648	1.17941	0.952212	0.961916	1.04904	1.0789	0.94435	1.03834	1.00255	1.08079	0.986844	1.04007	1.01724	1.03393	0.945137	0.745729	0.998154
949	TWCC13847 unique CNV	5	174001..175000	1.04789	1.09693	1.1169	1.13137	1.03477	0.99843	1.0431	1.16572	1.16253	1.18053	1.18991	1.10301	1.03896	2.00477	0.920944	1.21661	0.941669	1.06601	1.01909	1.08548	1.04613	1.17173	1.07938	1.05412	1.06238	1.14289	1.13011	0.964558	1.14188	1.06454	1.24782	1.12298	1.08857	1.04868	1.14324	1.07076	1.10626	1.0607	1.04745	1.03185	1.04069	1.06251	1.09171	1.10196	0.901729	1.13819
950	TWCC13847 unique CNV	5	175001..176000	1.13704	0.949307	0.995393	1.09567	1.15901	0.960143	1.08382	1.12149	1.07761	1.11788	1.05371	1.12844	1.03909	1.99885	0.978692	0.971564	1.05278	0.984225	1.04309	1.09925	1.01917	0.912347	0.999273	0.917118	0.906038	0.917304	0.971157	1.00863	1.02336	0.926293	1.18154	1.09769	1.11404	1.00468	1.13526	0.938938	1.10052	1.11686	1.04537	1.09258	1.04649	1.03974	1.02469	1.07496	0.820906	0.948865
951	TWCC13847 unique CNV	5	176001..177000	0.99297	1.0115	1.09598	1.04691	0.935197	1.04505	1.05771	1.07006	1.00835	1.16213	1.1553	1.15733	1.08224	2.01704	0.972901	1.04985	0.979506	0.993367	1.06972	1.12599	0.915351	1.02902	0.955125	0.916185	0.910007	1.01786	1.05232	1.02724	1.06333	0.981556	1.26407	1.0568	1.09947	0.925085	1.05177	0.979229	1.05255	1.0406	1.09408	1.03122	1.05095	1.02101	1.00664	1.06063	0.890493	0.965563
952	TWCC13847 unique CNV	5	177001..178000	0.935227	0.892014	1.00033	0.920196	1.01748	1.06913	1.04549	1.10504	0.89423	1.02996	0.981483	1.10276	1.03315	1.81472	0.951464	0.981673	0.882788	1.05669	0.991605	0.951926	0.959079	0.983751	1.0317	0.935897	0.943699	0.9666	1.02217	0.959403	0.922142	1.03883	1.1594	1.00877	0.968229	0.932322	0.895013	0.869616	0.944515	1.00159	0.923973	0.963837	1.00562	0.902498	0.962675	0.963055	1.08989	0.943323
953	TWCC13847 unique CNV	5	178001..179000	1.19952	1.13252	1.04631	0.943464	1.05823	1.12621	1.01543	1.07295	1.11722	1.02545	1.0771	1.08667	1.01104	2.03137	1.19534	1.07161	0.917343	1.00802	0.9914	1.0171	1.0744	1.10178	1.06726	1.16354	1.03407	0.979631	0.966208	0.97345	1.07813	0.987465	1.21001	0.9404	1.06245	1.06671	0.999611	1.08642	1.04135	1.00335	0.988858	0.986084	1.04063	1.03972	1.0609	0.998369	1.14857	1.06533
954	TWCC13847 unique CNV	5	179001..180000	1.17736	1.17993	1.06664	1.13258	1.0242	1.05395	1.05883	0.996447	1.0957	1.13526	1.07953	1.15951	0.952476	1.87884	1.18724	0.995026	0.95366	1.04309	1.04937	1.07458	1.08531	1.07021	1.03039	1.08341	0.923389	0.991912	1.01808	0.989512	1.06516	1.0244	1.16484	1.03605	1.00862	1.07478	0.990398	0.93535	1.03411	1.03905	1.05942	1.00449	0.961435	1.13274	1.16171	1.02605	0.939869	1.01289
955	TWCC13847 unique CNV	5	180001..181000	0.926488	1.01934	1.03313	0.920285	0.973595	0.869223	0.974857	0.992333	1.1354	0.997346	1.0277	1.05486	0.964941	1.85342	1.06173	1.09674	0.963545	0.988467	0.880772	0.975849	1.0162	1.01498	0.904927	0.991354	1.02586	0.921685	0.970623	0.911182	0.903427	0.931806	1.16991	0.957785	0.916527	0.922442	0.896574	0.80303	0.941277	1.0669	1.06732	0.988183	0.990903	1.01942	1.01824	1.02676	1.06272	1.02896
956	TWCC13847 unique CNV	5	182001..183000	0.82718	0.97492	1.12024	1.04634	0.968059	0.977891	1.04093	0.944007	0.974178	1.03323	1.00421	0.996085	1.01613	1.97551	0.95099	1.01434	1.03437	0.976995	0.990057	0.963278	0.98941	0.95771	0.989643	1.02403	0.938922	0.966366	0.982995	0.945506	0.962628	0.98423	1.08831	1.00479	0.952306	0.983865	1.08482	1.00192	0.916869	1.00485	0.949977	1.06264	0.93723	0.951545	1.01811	1.0002	1.05992	0.995491
957	TWCC13847 unique CNV	5	183001..184000	0.876691	0.857762	0.9732	0.924844	0.849531	1.0516	0.985539	0.996751	0.834076	1.01661	0.966606	1.03656	0.993017	1.80216	0.826836	0.958456	0.961145	0.857601	0.986561	0.975776	0.878322	0.773534	0.928782	0.924876	0.740406	0.889994	0.977571	0.931334	0.959524	0.992913	1.19603	1.04083	0.905603	0.925511	0.960802	0.892562	0.938929	0.927524	0.945164	0.968898	0.942081	0.921251	0.944947	0.932378	0.907822	0.91142
958	TWCC13847 unique CNV	5	184001..185000	0.91942	0.870467	0.923008	0.882469	0.903576	0.94648	1.07084	0.936966	0.942287	1.00126	1.08298	1.14064	1.02971	2.1936	0.96082	0.984015	0.981785	0.973625	0.992481	0.968775	0.96799	0.967347	0.949222	1.03097	1.02121	1.02267	0.998259	0.967975	1.03151	1.0767	1.15002	1.01152	1.05344	1.01792	1.13506	0.924279	0.931572	1.00758	0.972739	1.03724	1.03845	1.03058	0.926758	1.00048	0.90289	1.01222
959	TWCC13847 unique CNV	5	185001..186000	0.892795	0.935085	0.917183	0.857387	0.937992	1.01628	0.90339	1.06719	0.895366	1.13484	0.946469	1.09929	1.17048	1.84973	0.832177	0.885334	0.894971	0.874021	0.88561	0.793105	0.757156	0.84791	0.912517	0.933477	0.867051	0.944604	0.988642	0.936455	0.834981	0.907479	1.13482	0.953013	0.925558	0.99857	0.86977	0.839812	0.962114	0.939434	0.970417	0.90319	0.927055	0.962052	0.931195	0.949458	1.04195	0.962792
960	TWCC13847 unique CNV	5	186001..187000	1.00655	1.0504	0.962883	0.992608	1.05481	1.07197	1.07637	0.935798	0.989813	1.06677	1.05012	0.933314	1.06259	1.95709	1.09356	1.04143	0.953184	0.971868	1.03105	1.04697	0.992899	0.878802	1.11223	1.02593	1.00163	1.10632	1.13301	1.0441	1.06103	1.09629	1.26257	1.0703	1.07804	1.09279	1.11468	1.12665	1.11969	1.06631	1.16425	0.996349	1.06623	1.07506	1.02957	1.09589	0.952788	1.03878
961	TWCC13847 unique CNV	5	187001..188000	0.995371	0.81869	0.918654	0.848676	0.965452	0.960642	0.945733	0.890797	0.950355	0.901744	0.956435	0.842121	0.865497	1.70411	0.759471	1.0345	1.02542	1.08002	1.01496	1.01795	0.873703	0.89285	0.970325	1.02158	0.921334	0.968537	0.92327	0.899575	0.894045	0.937244	1.05277	0.910349	0.888465	0.932254	1.05621	0.943884	0.93935	0.903052	0.919365	0.929834	0.909161	1.00781	0.988936	0.986653	0.824426	0.902481
962	TWCC13847 unique CNV	5	188001..189000	0.978252	0.954283	1.0057	0.958864	0.963195	0.897748	0.921149	0.870745	0.852515	0.879372	1.01162	0.861559	0.985108	1.61005	0.902871	1.11154	1.09646	0.980652	1.01591	1.09208	1.11253	1.06275	0.868047	0.976925	0.946833	1.0693	0.949479	1.00154	0.965517	0.952722	1.08219	1.03733	0.938234	1.02613	1.15124	0.996951	1.00566	0.91367	0.943654	0.983312	0.978292	0.973254	0.941528	1.01577	0.892833	0.94824
963	TWCC13847 unique CNV	5	189001..190000	1.03156	1.11728	1.02045	1.12864	1.01005	1.01369	1.1436	0.81889	1.17616	0.907184	1.08468	1.02379	0.940041	1.90723	0.965475	0.864261	0.865277	0.962022	0.881536	0.924356	0.920275	0.920897	0.810287	0.940329	0.892401	0.930822	0.799783	0.872704	0.940101	0.872026	0.996611	0.919064	0.840068	0.86575	0.869132	0.88719	1.06629	1.0752	1.08399	1.00954	1.00505	1.02849	1.03165	1.10794	0.778821	1.0595
[truncated: 835 more rows]
[truncated: 65 more columns]
